# Supplementary material for: Preoperative Quantitative MR Tractography Compared with Visual Tract Evaluation in Patients with Neuropathologically Confirmed Gliomas Grades II and III: A Prospective Cohort Study
Source: Hindawi journal article supplement (doi:10.1155/2016/7671854), 2016-01-01
Supplement: f1 [file 7671854.f1.pdf]

## **Supplementary information**

**S. fig 1 a-i**

a.

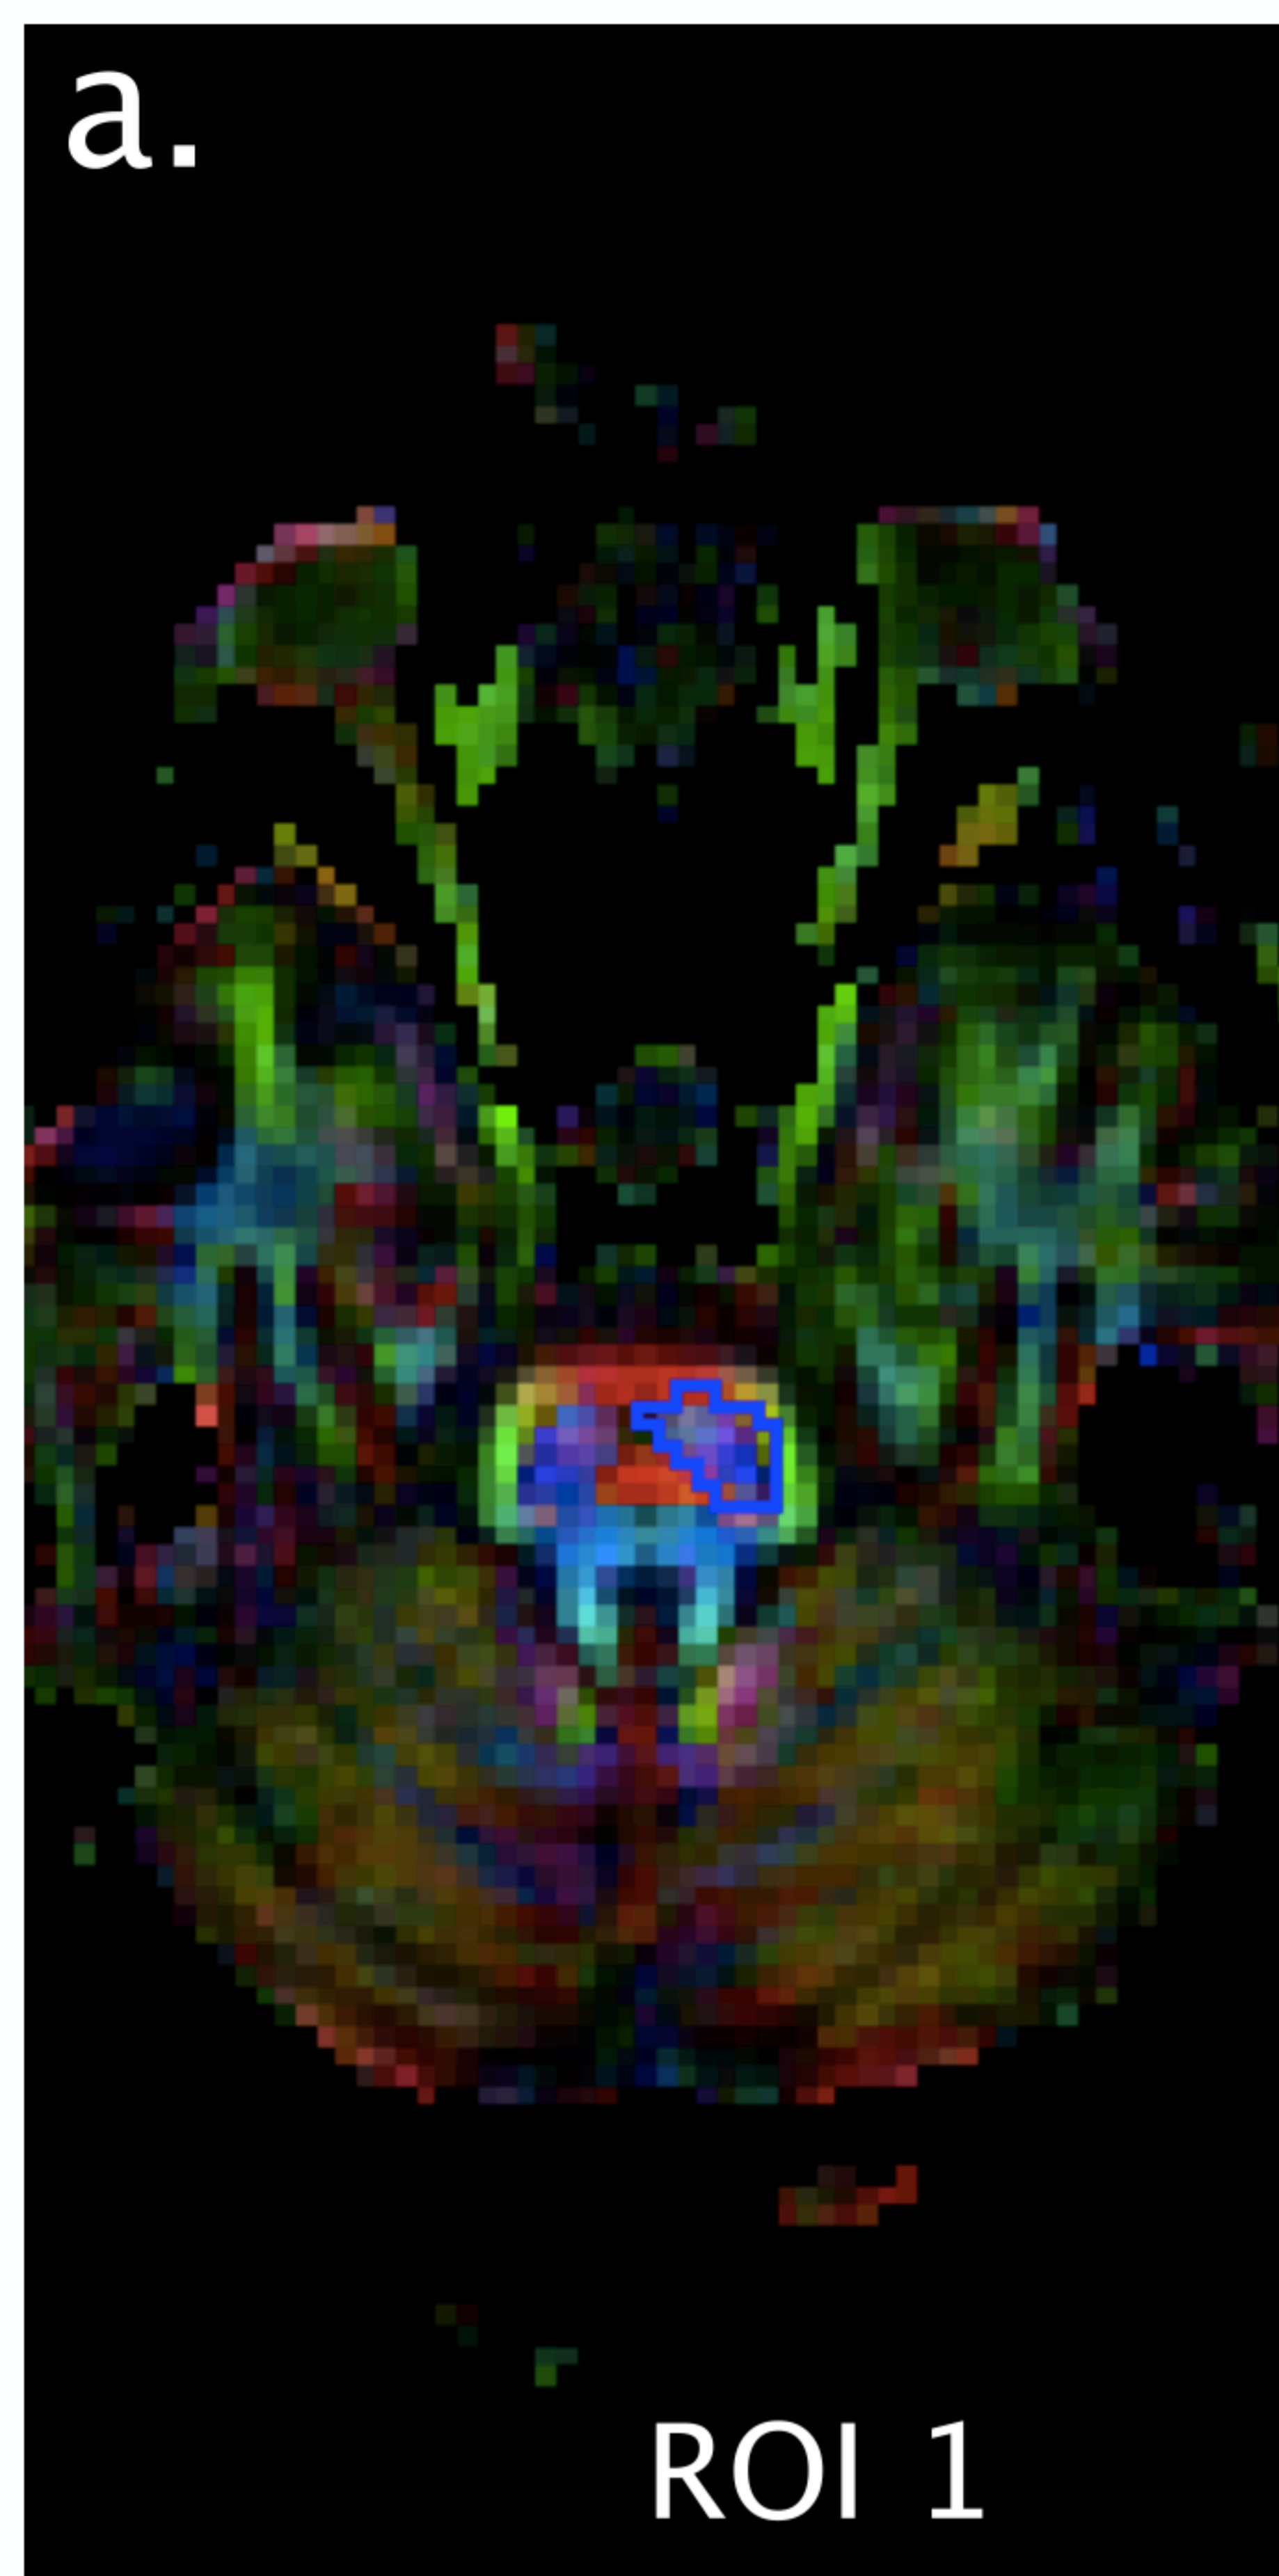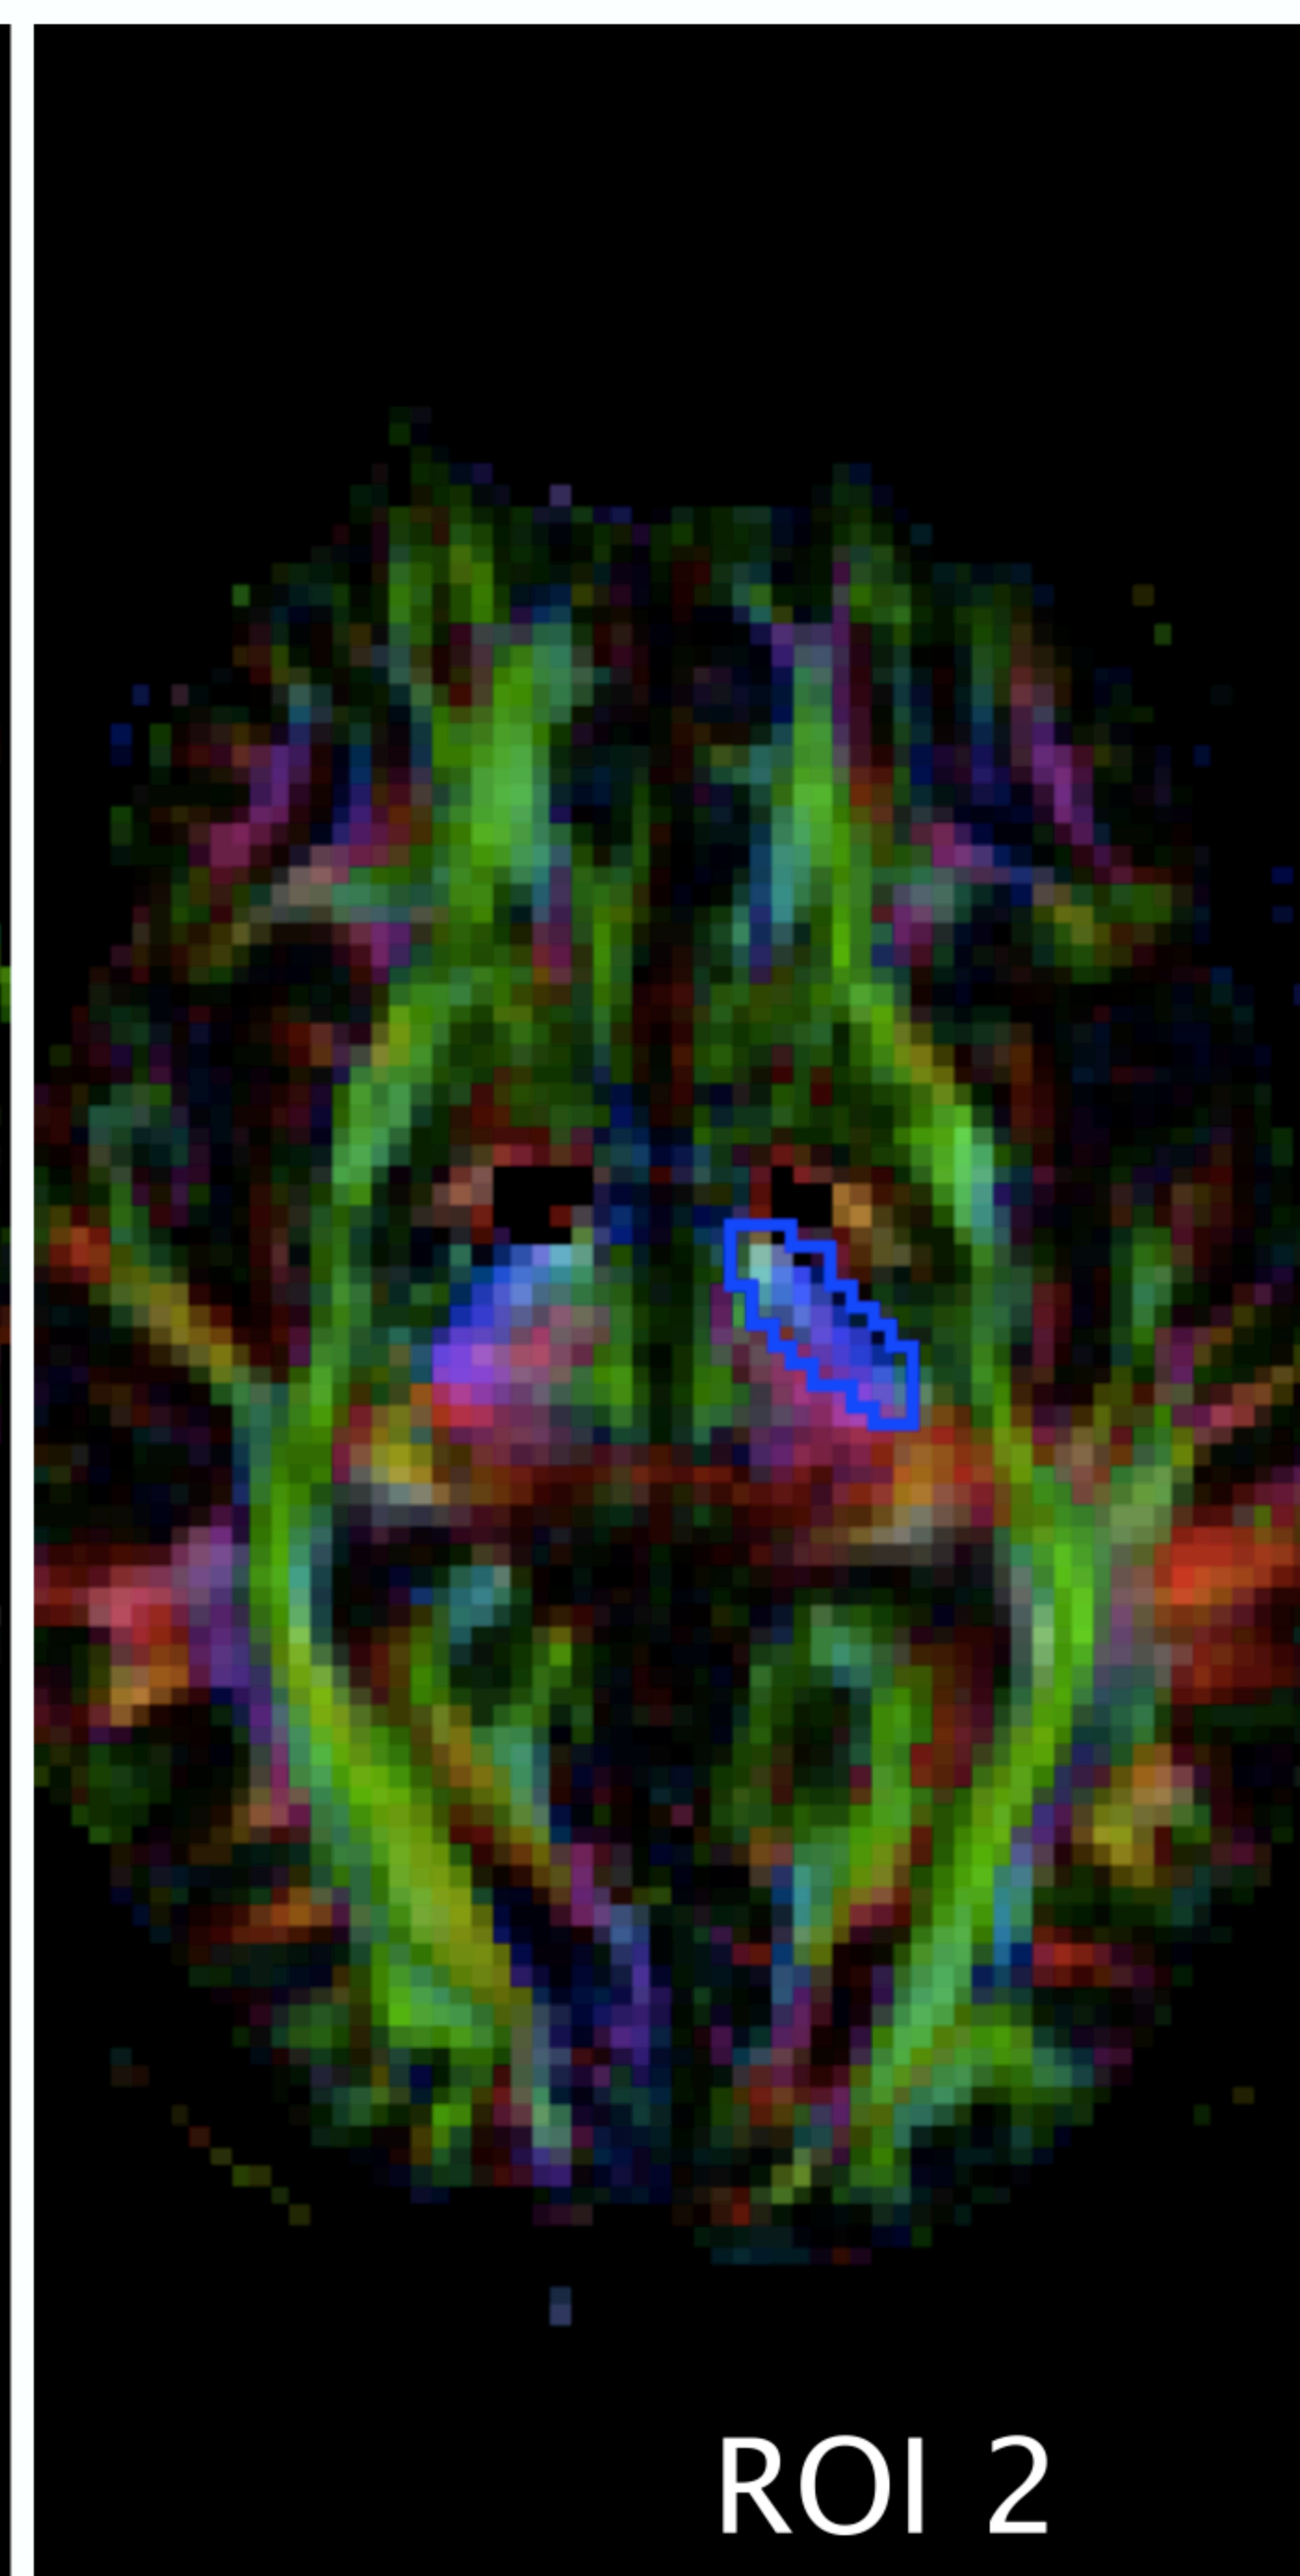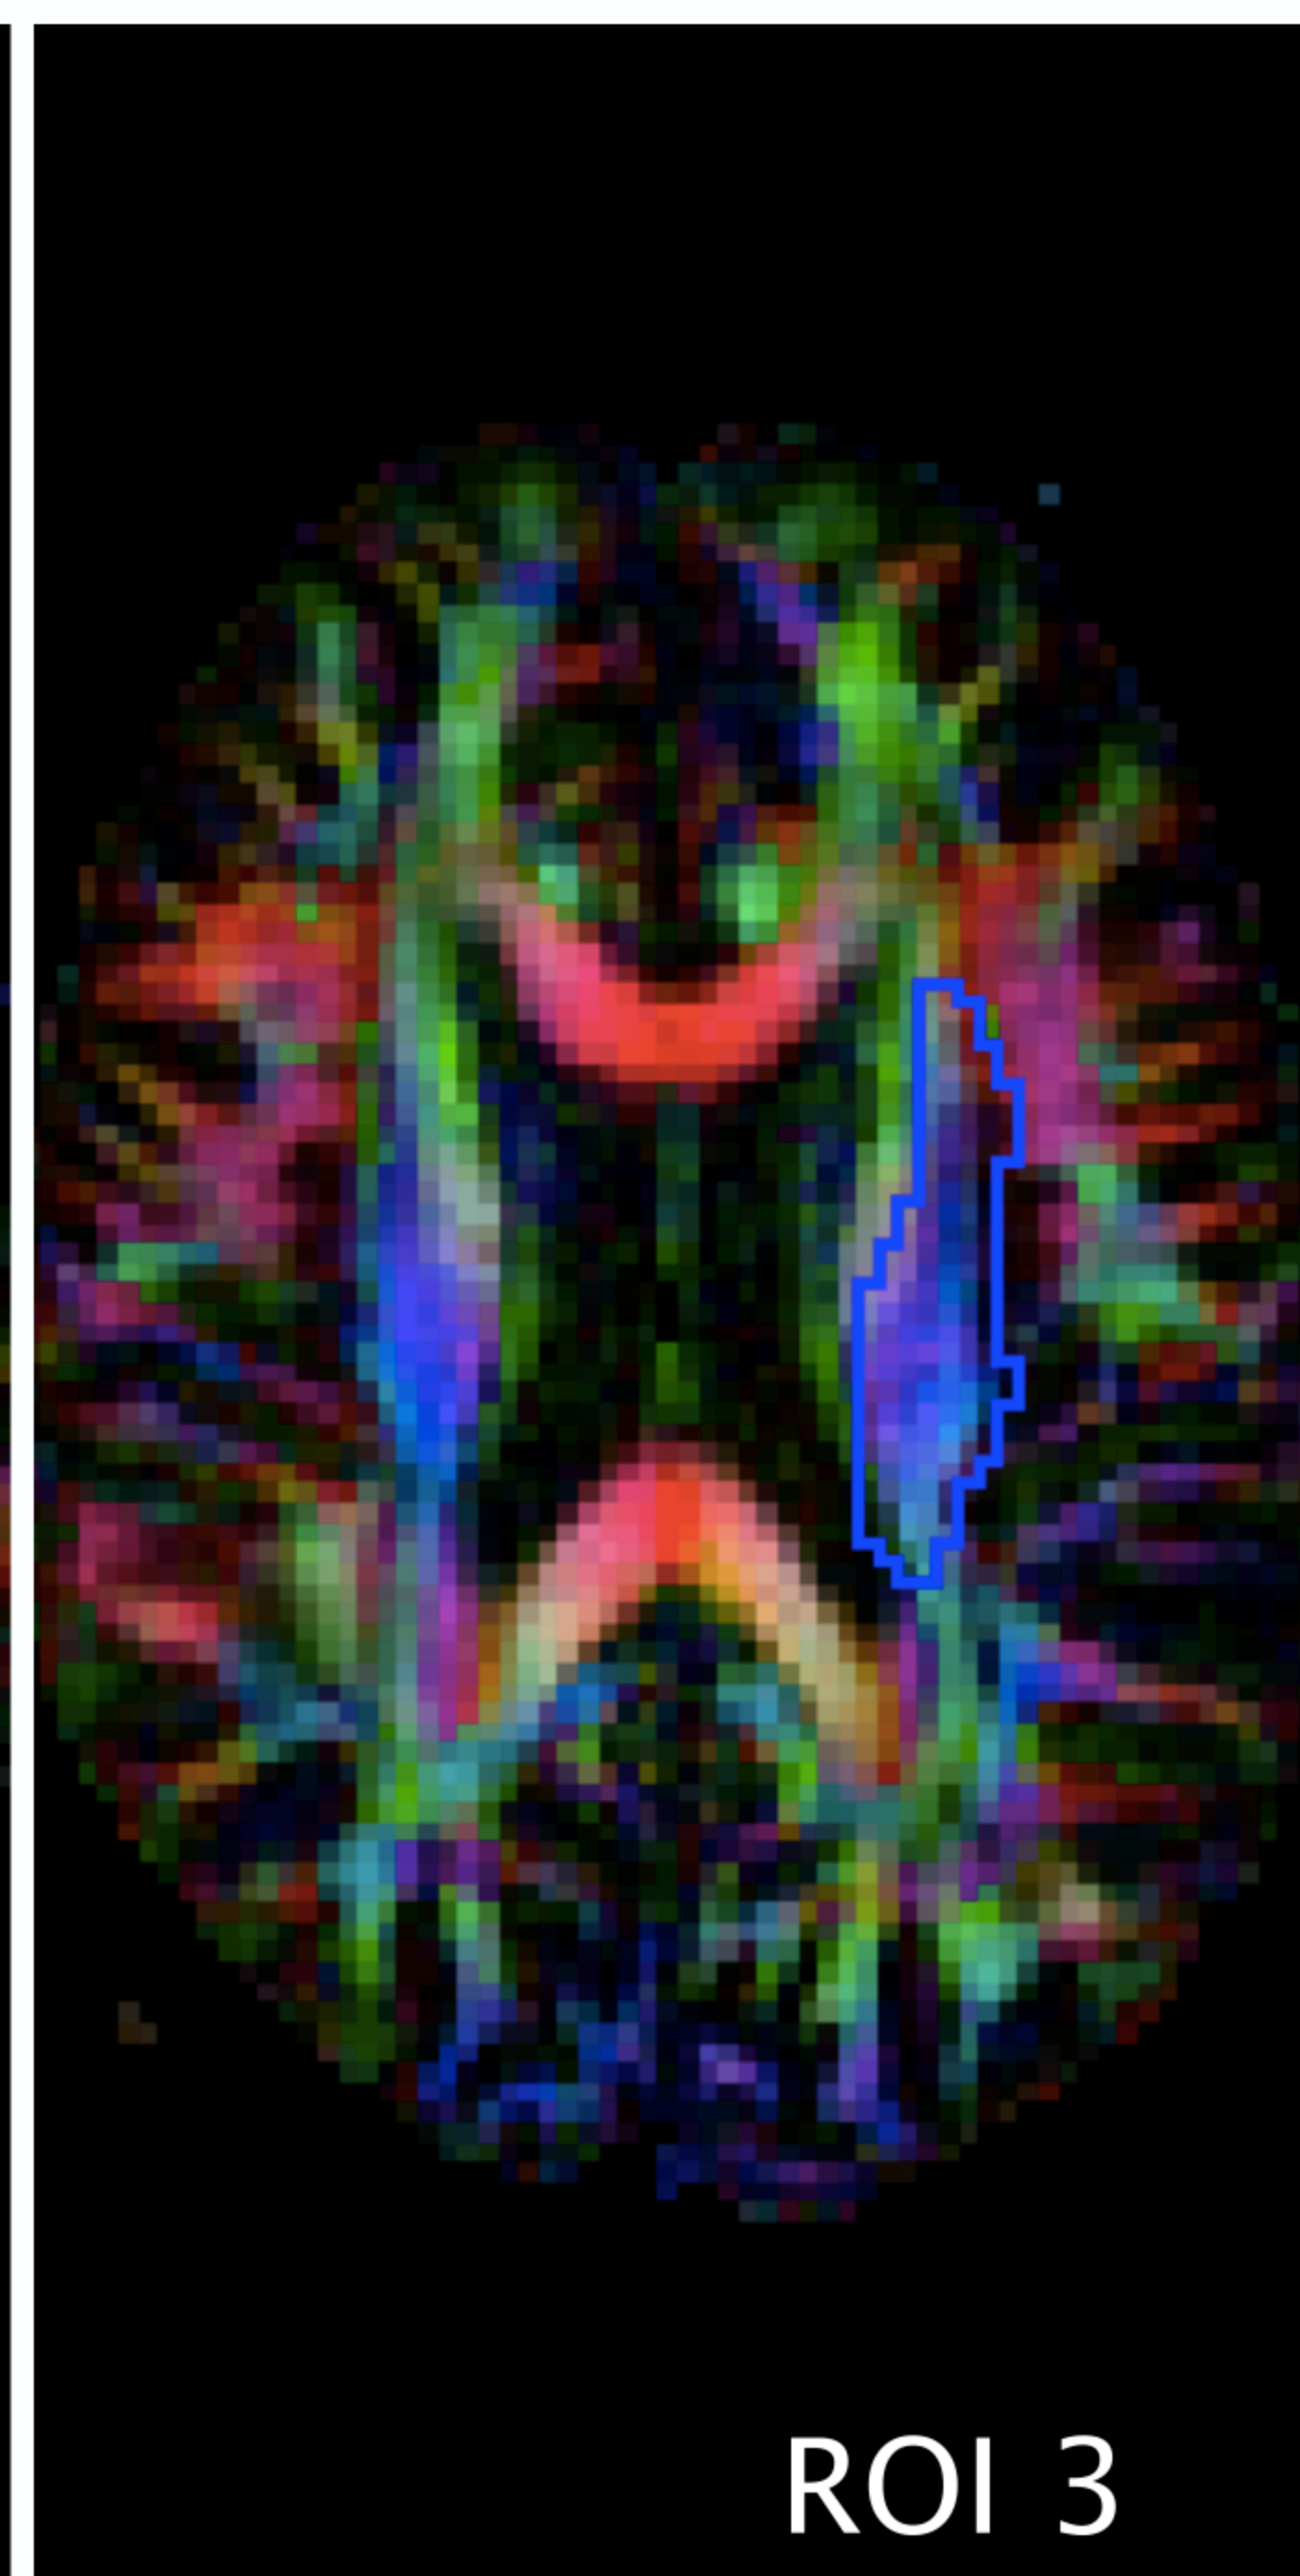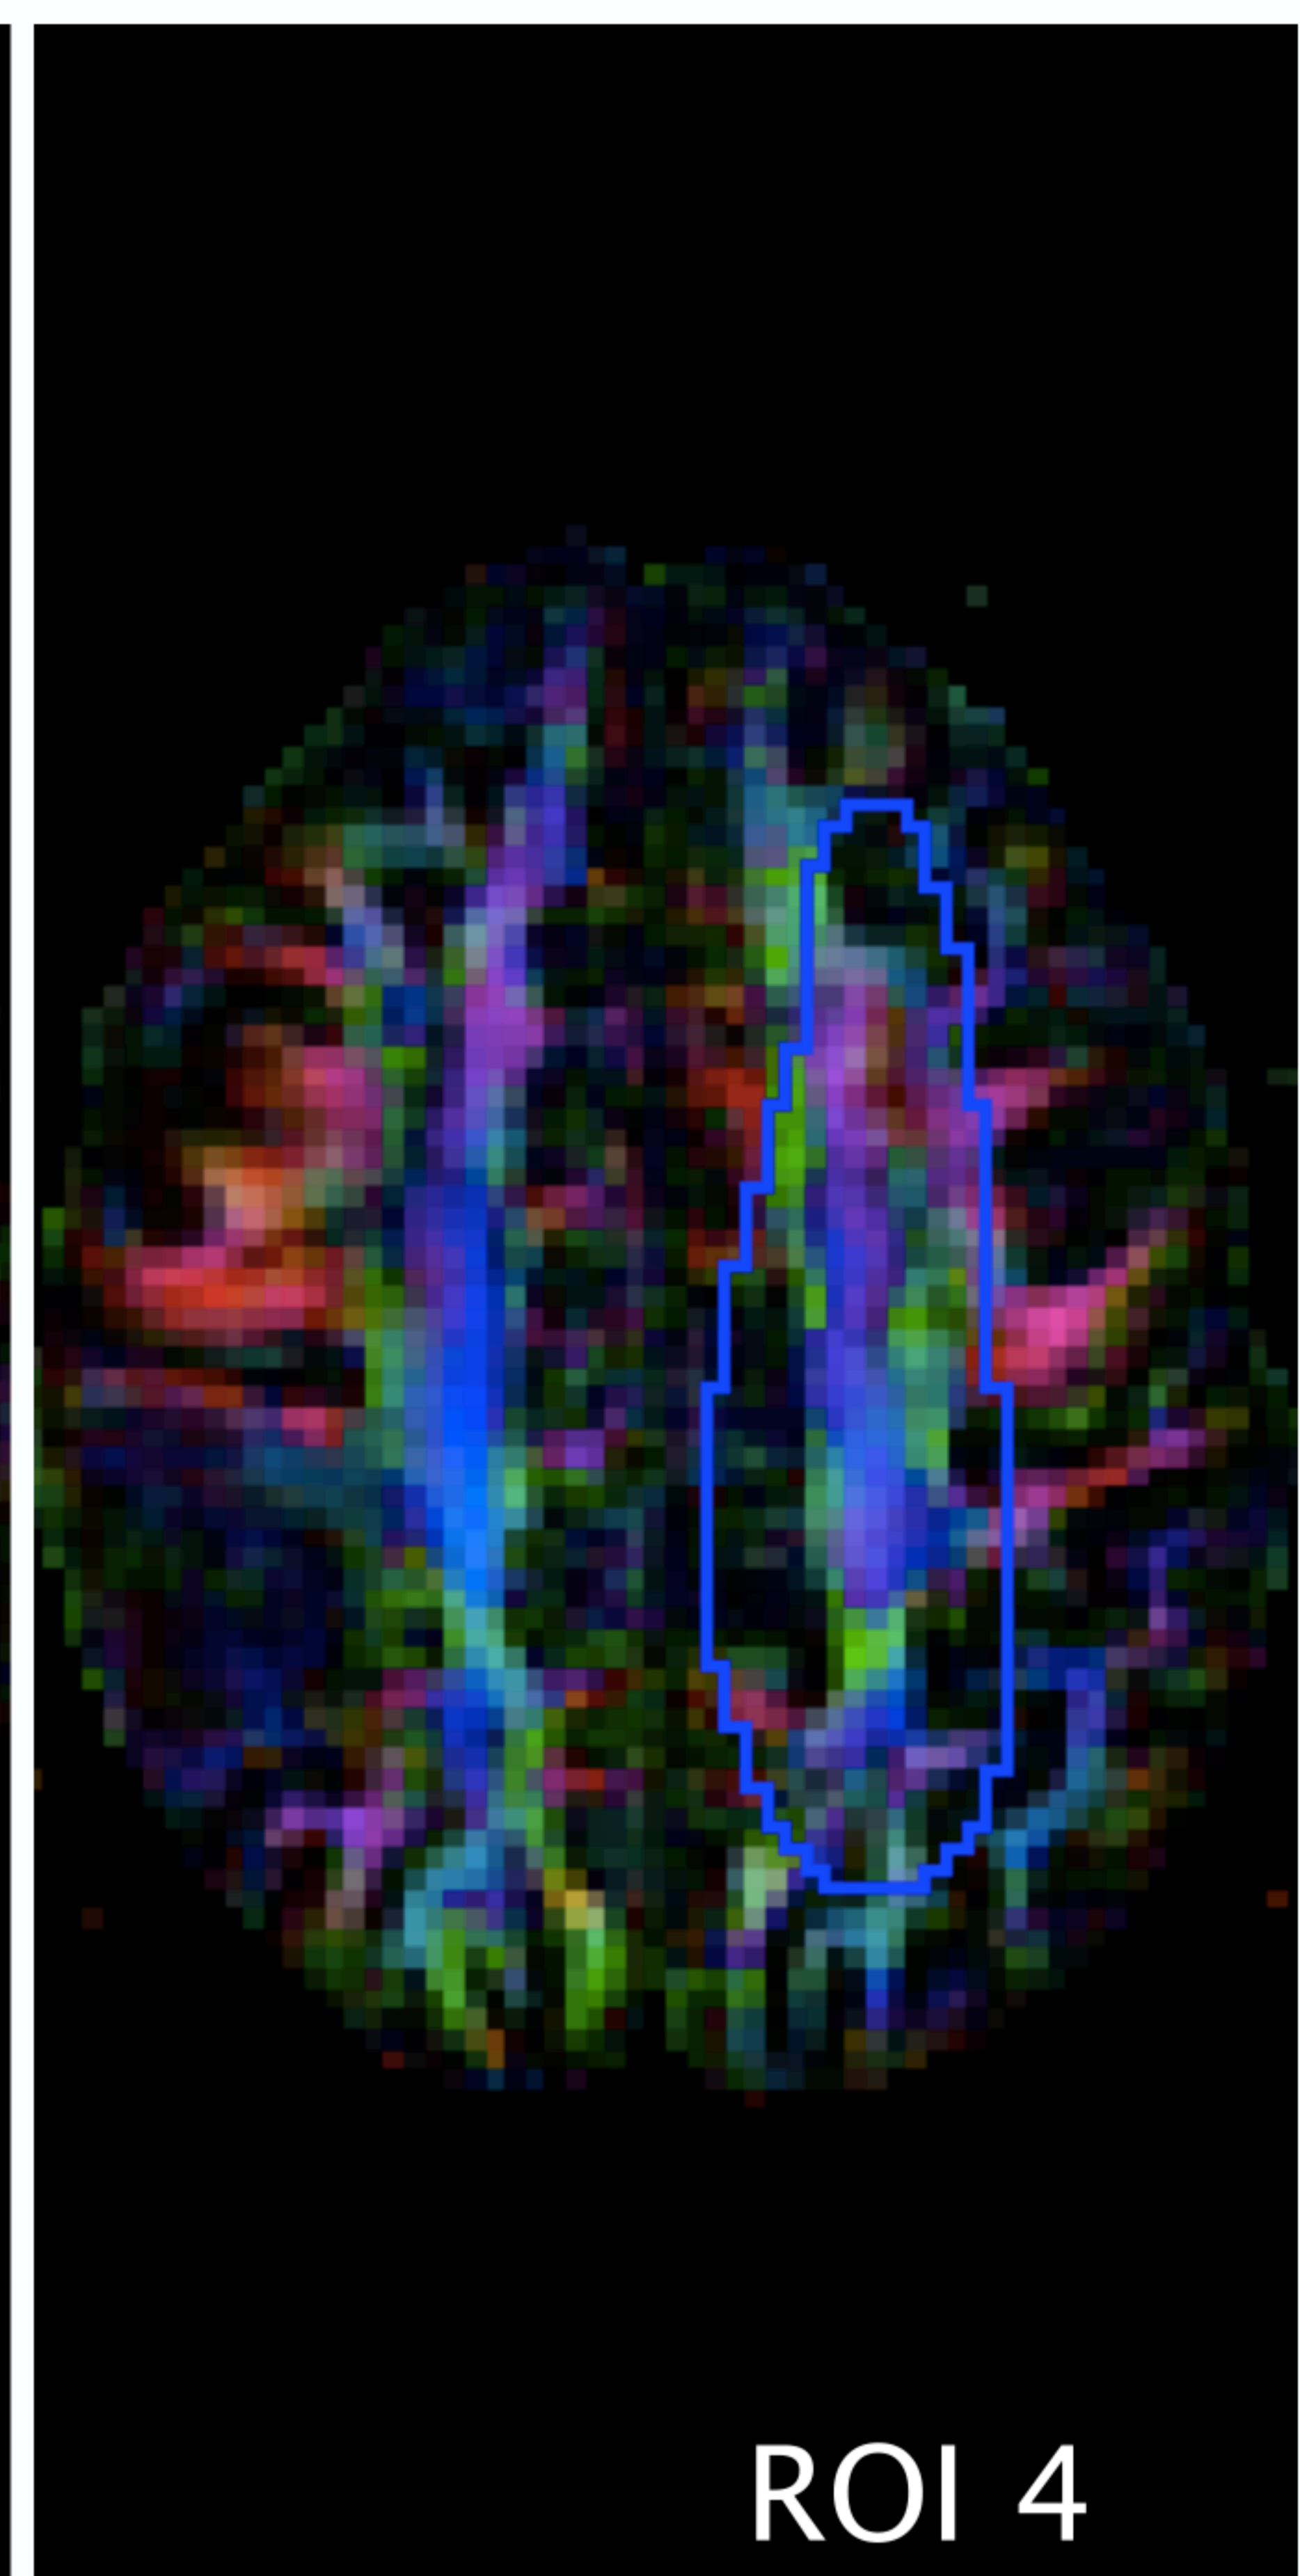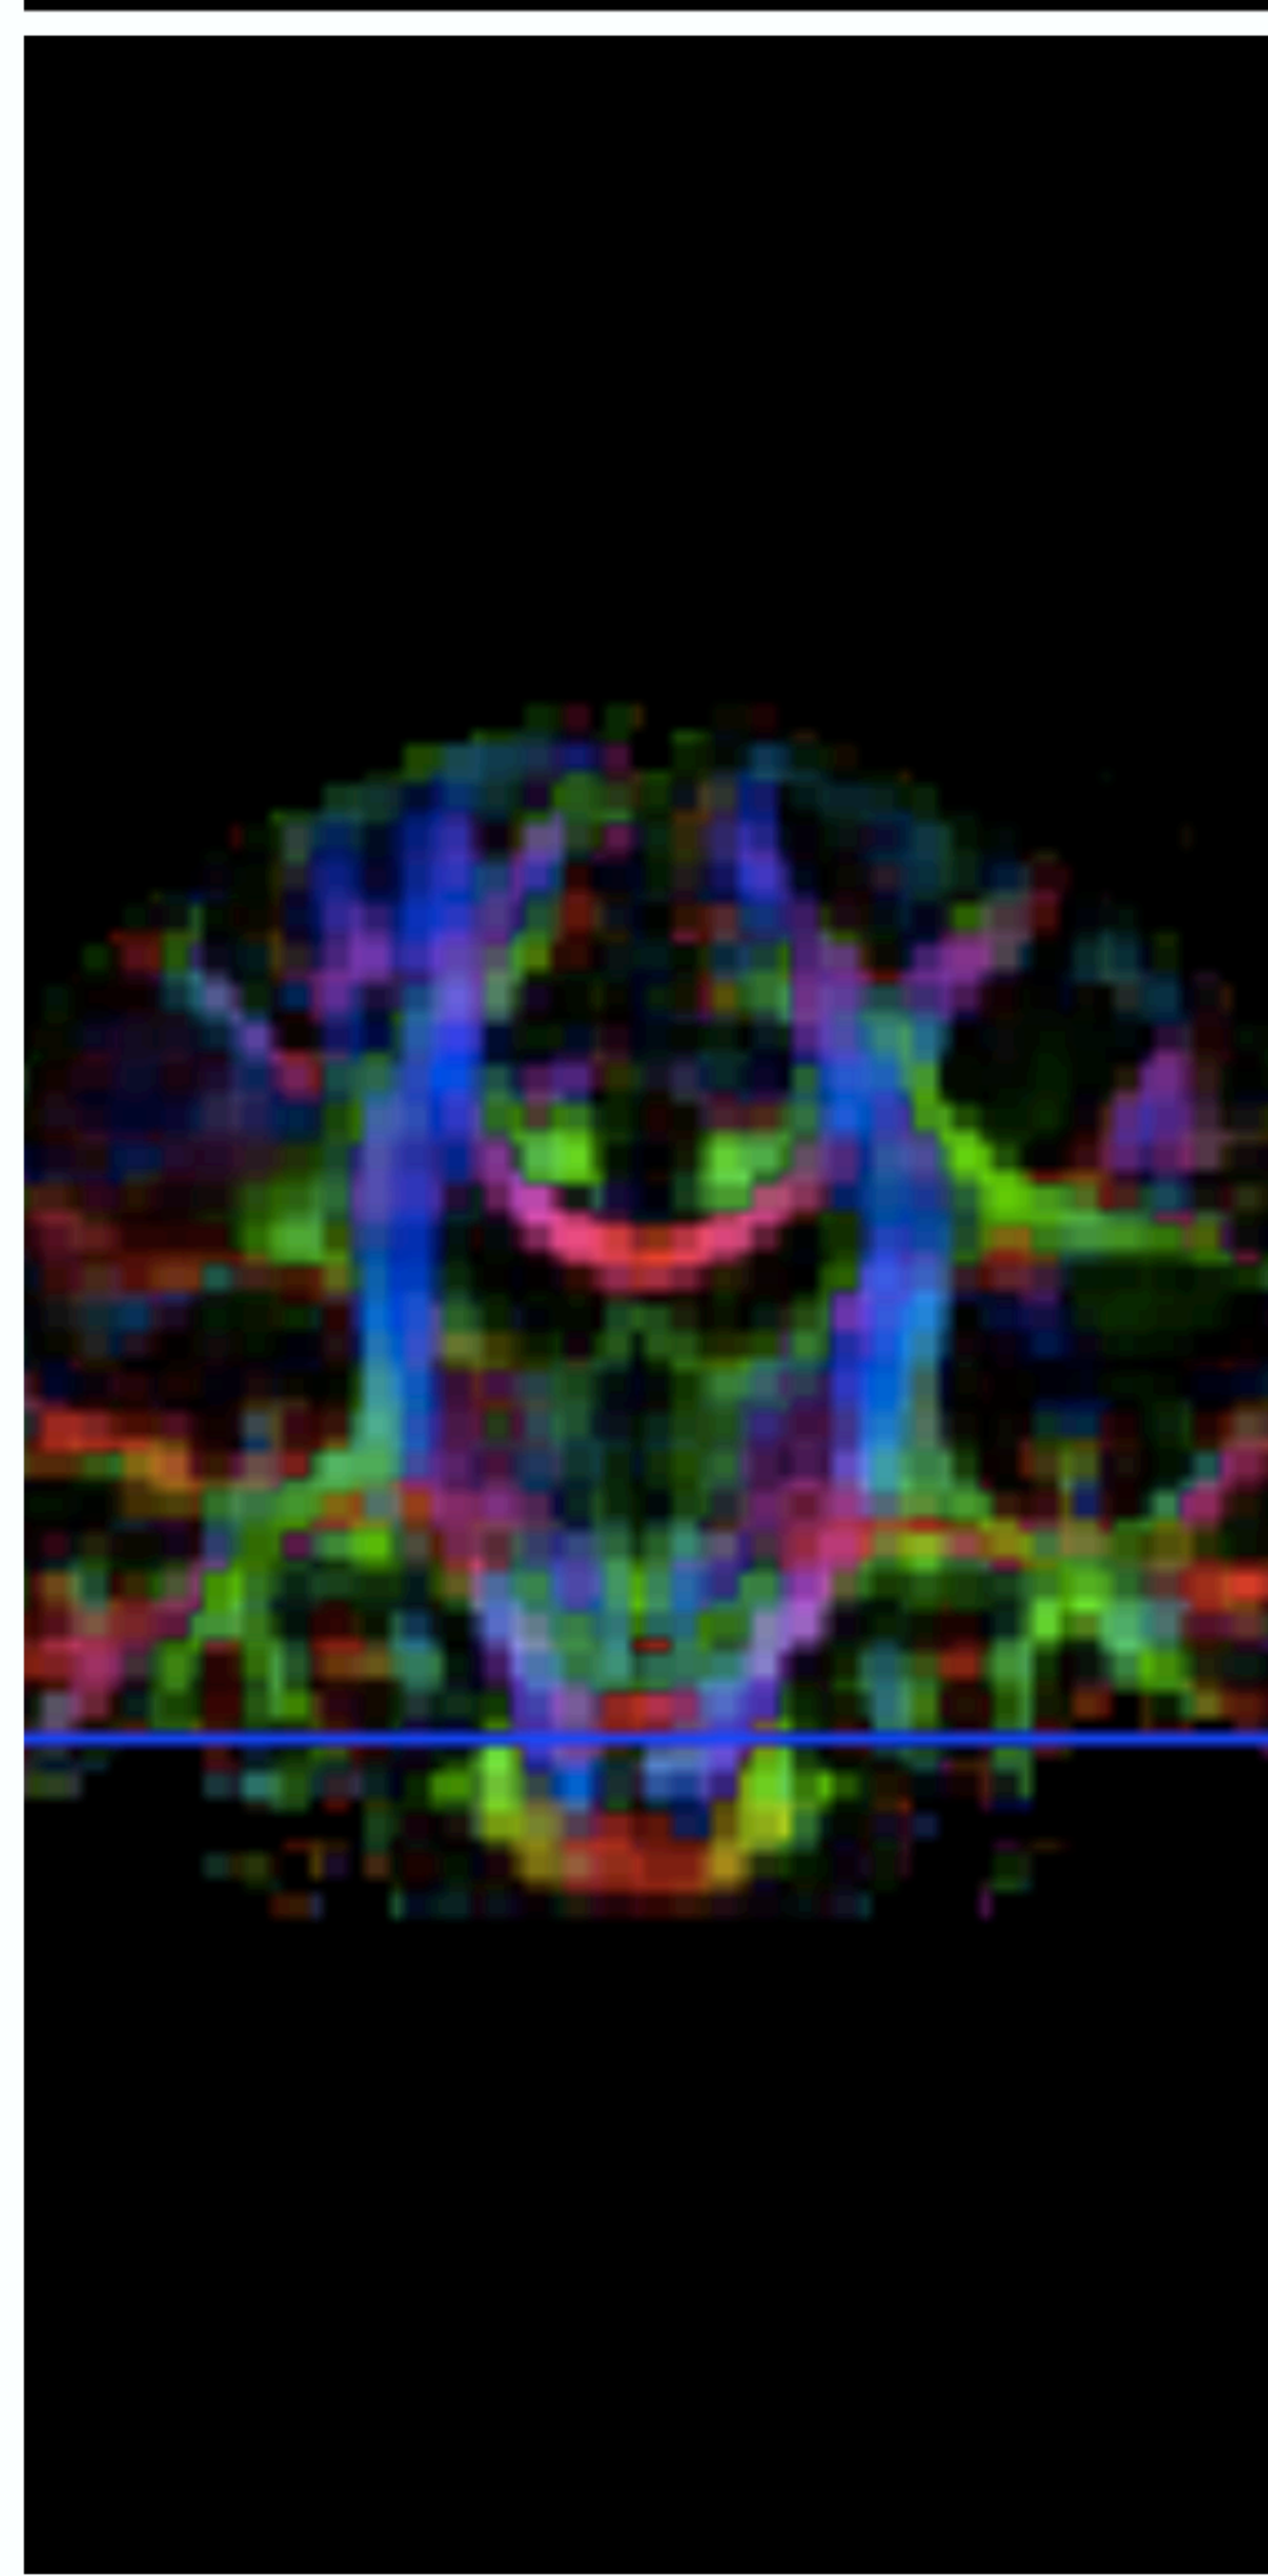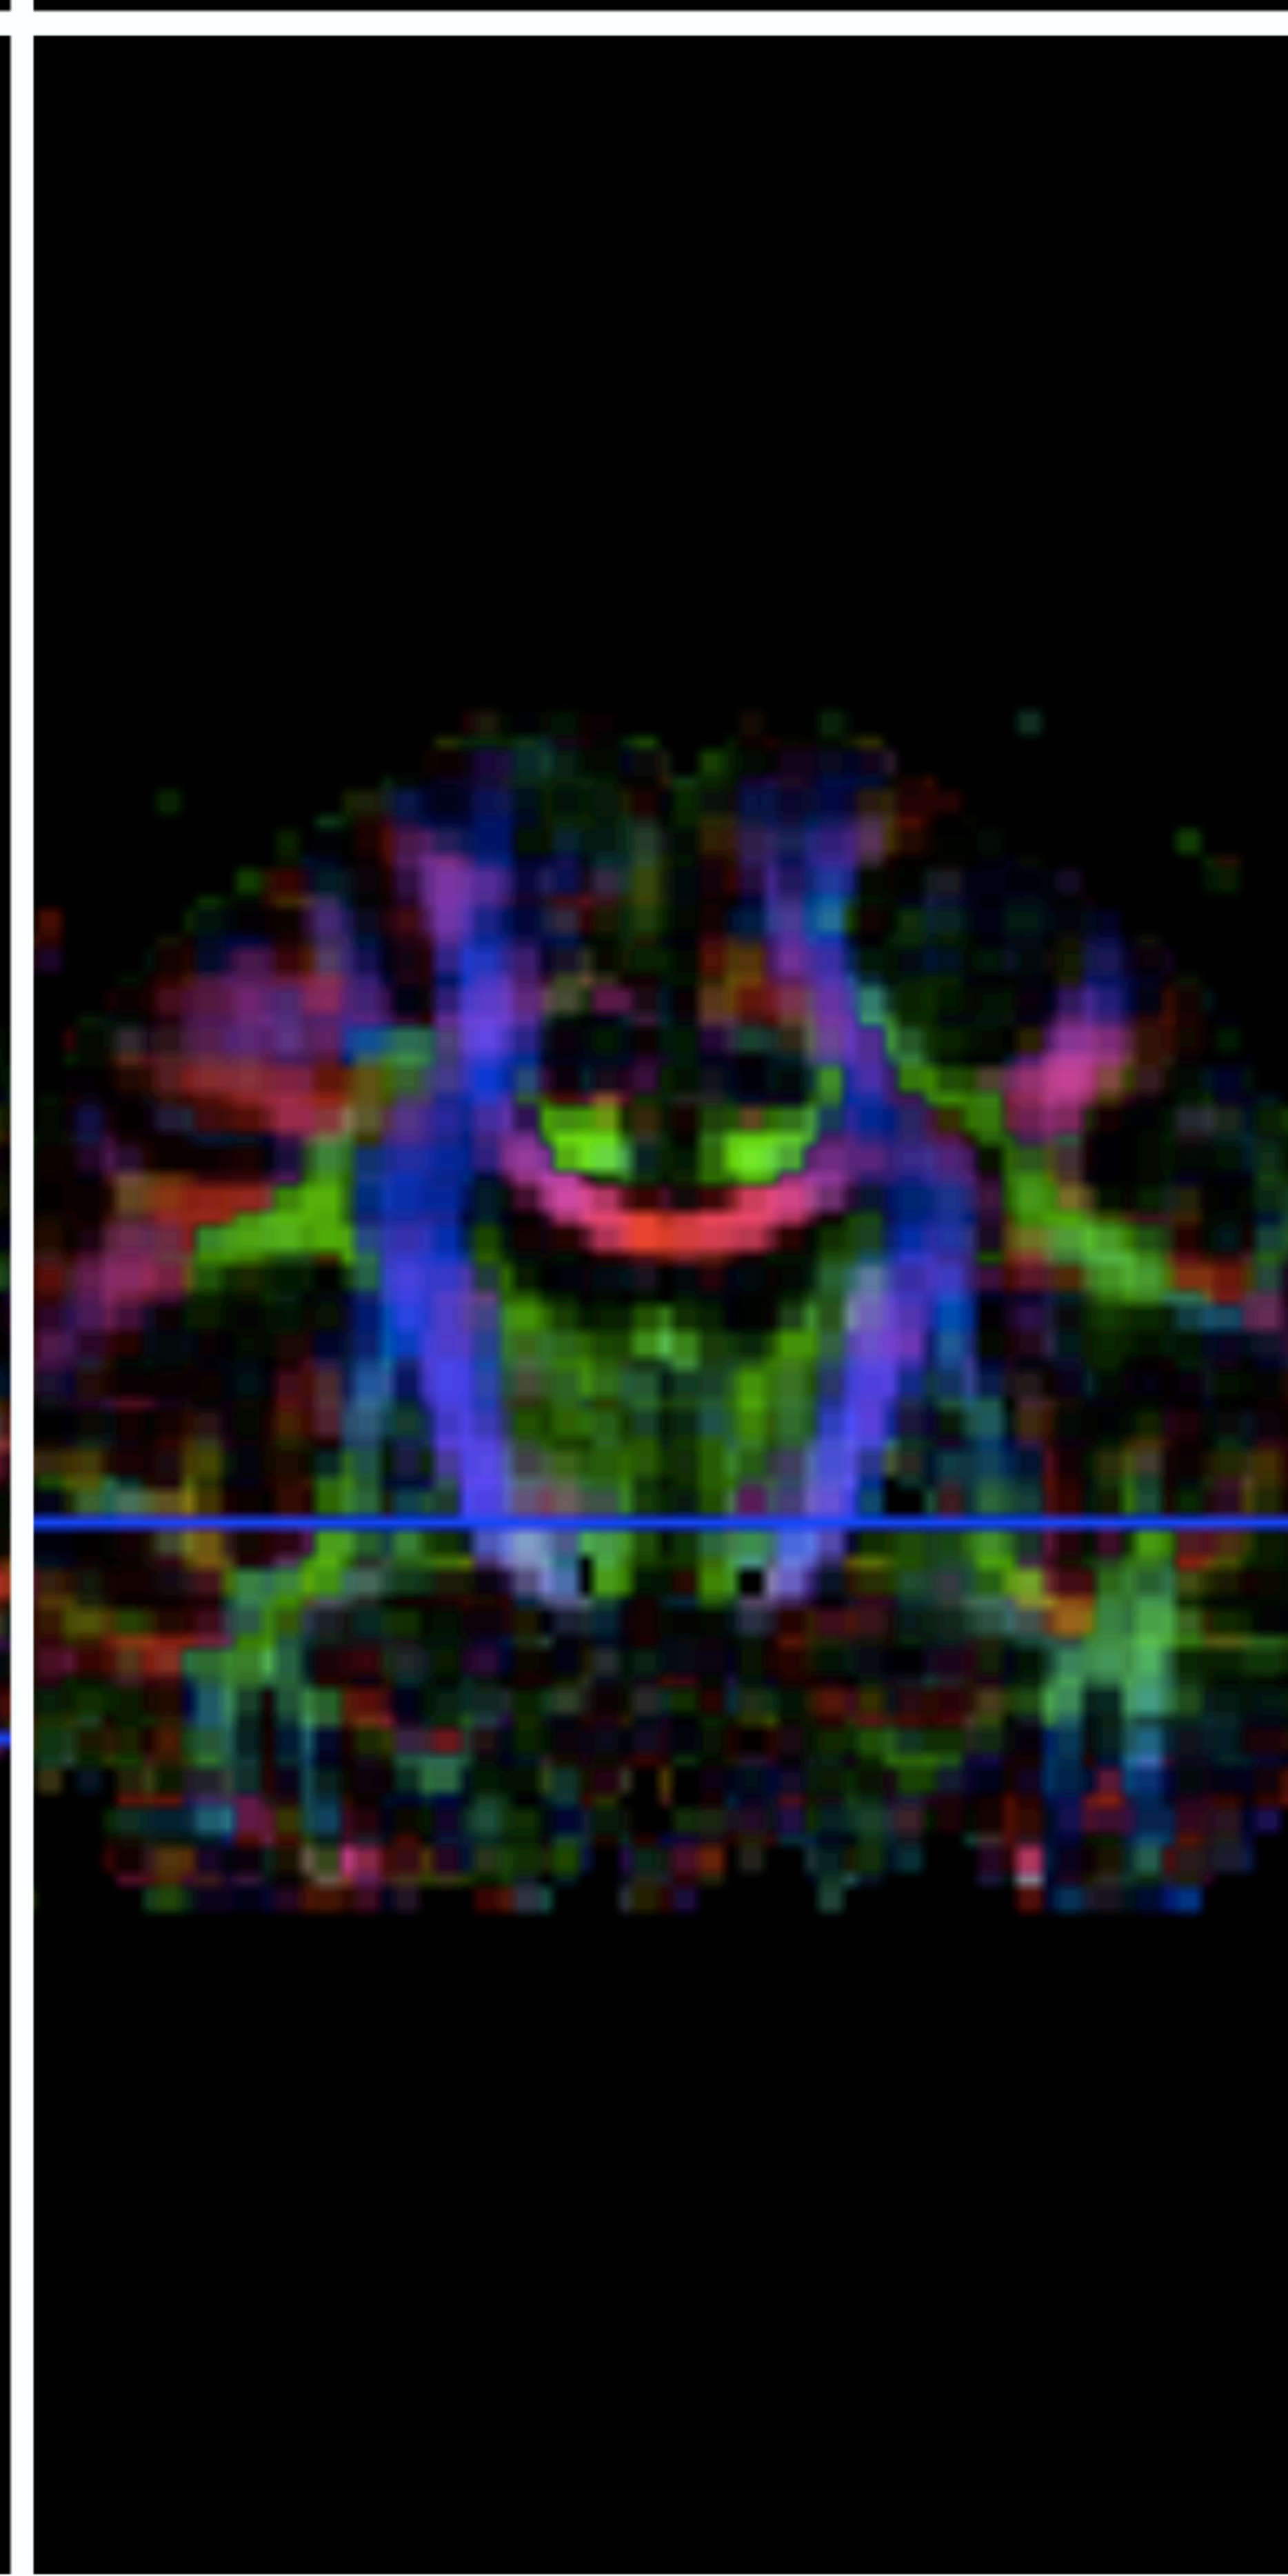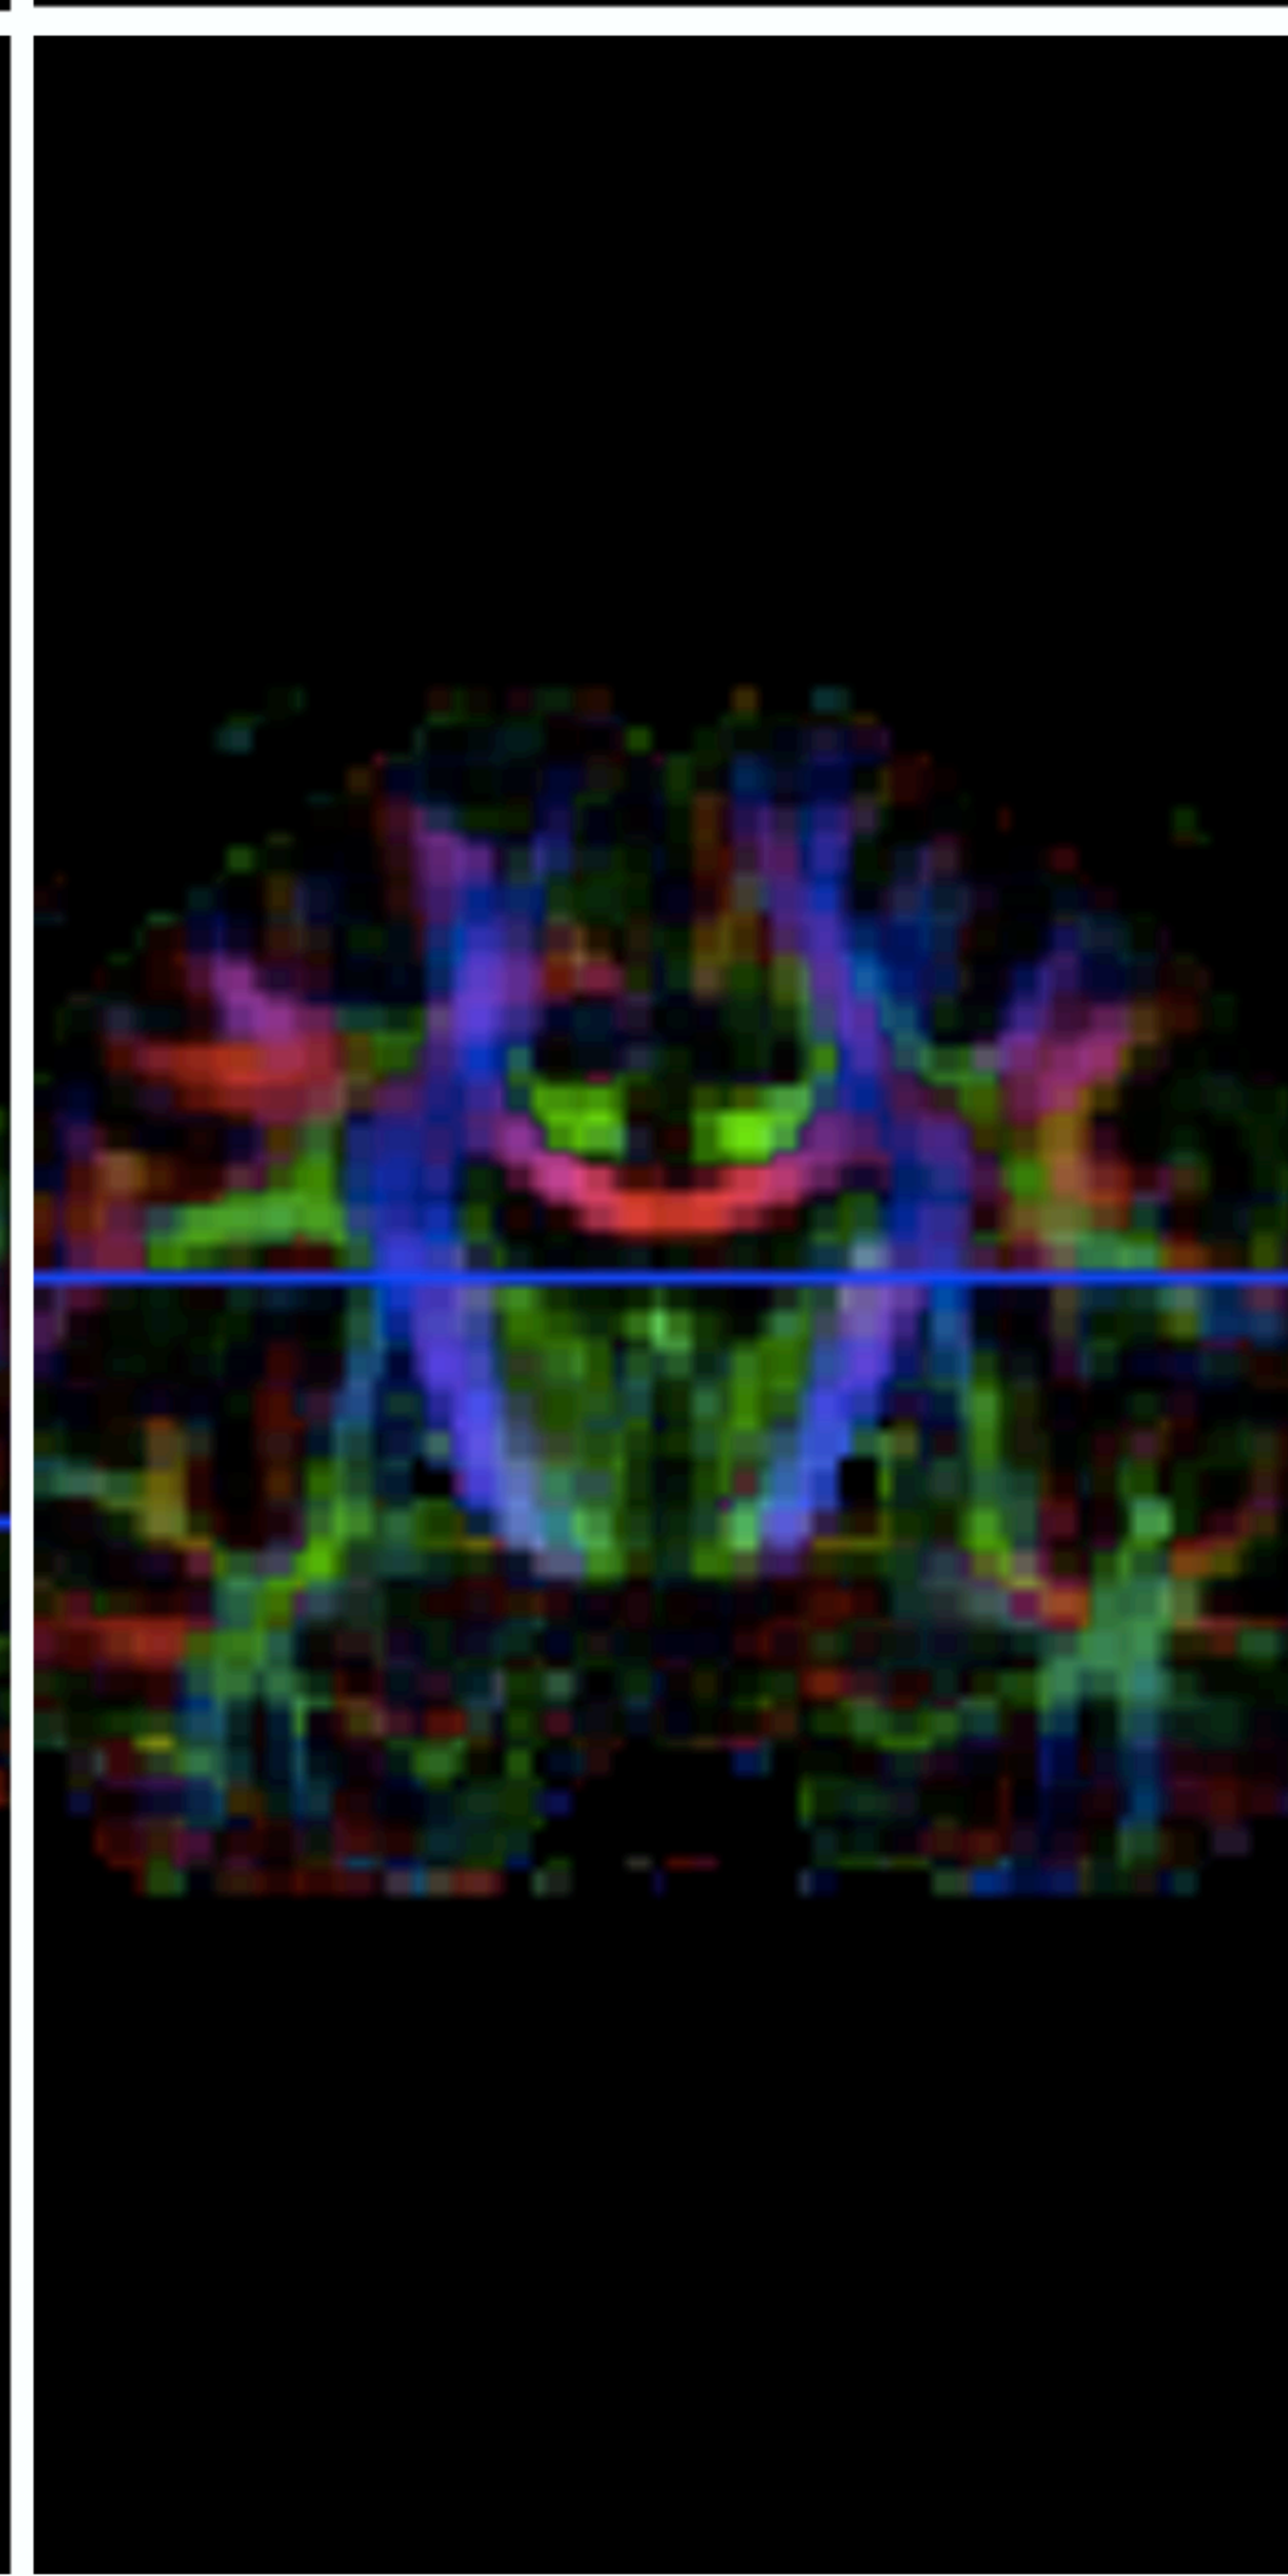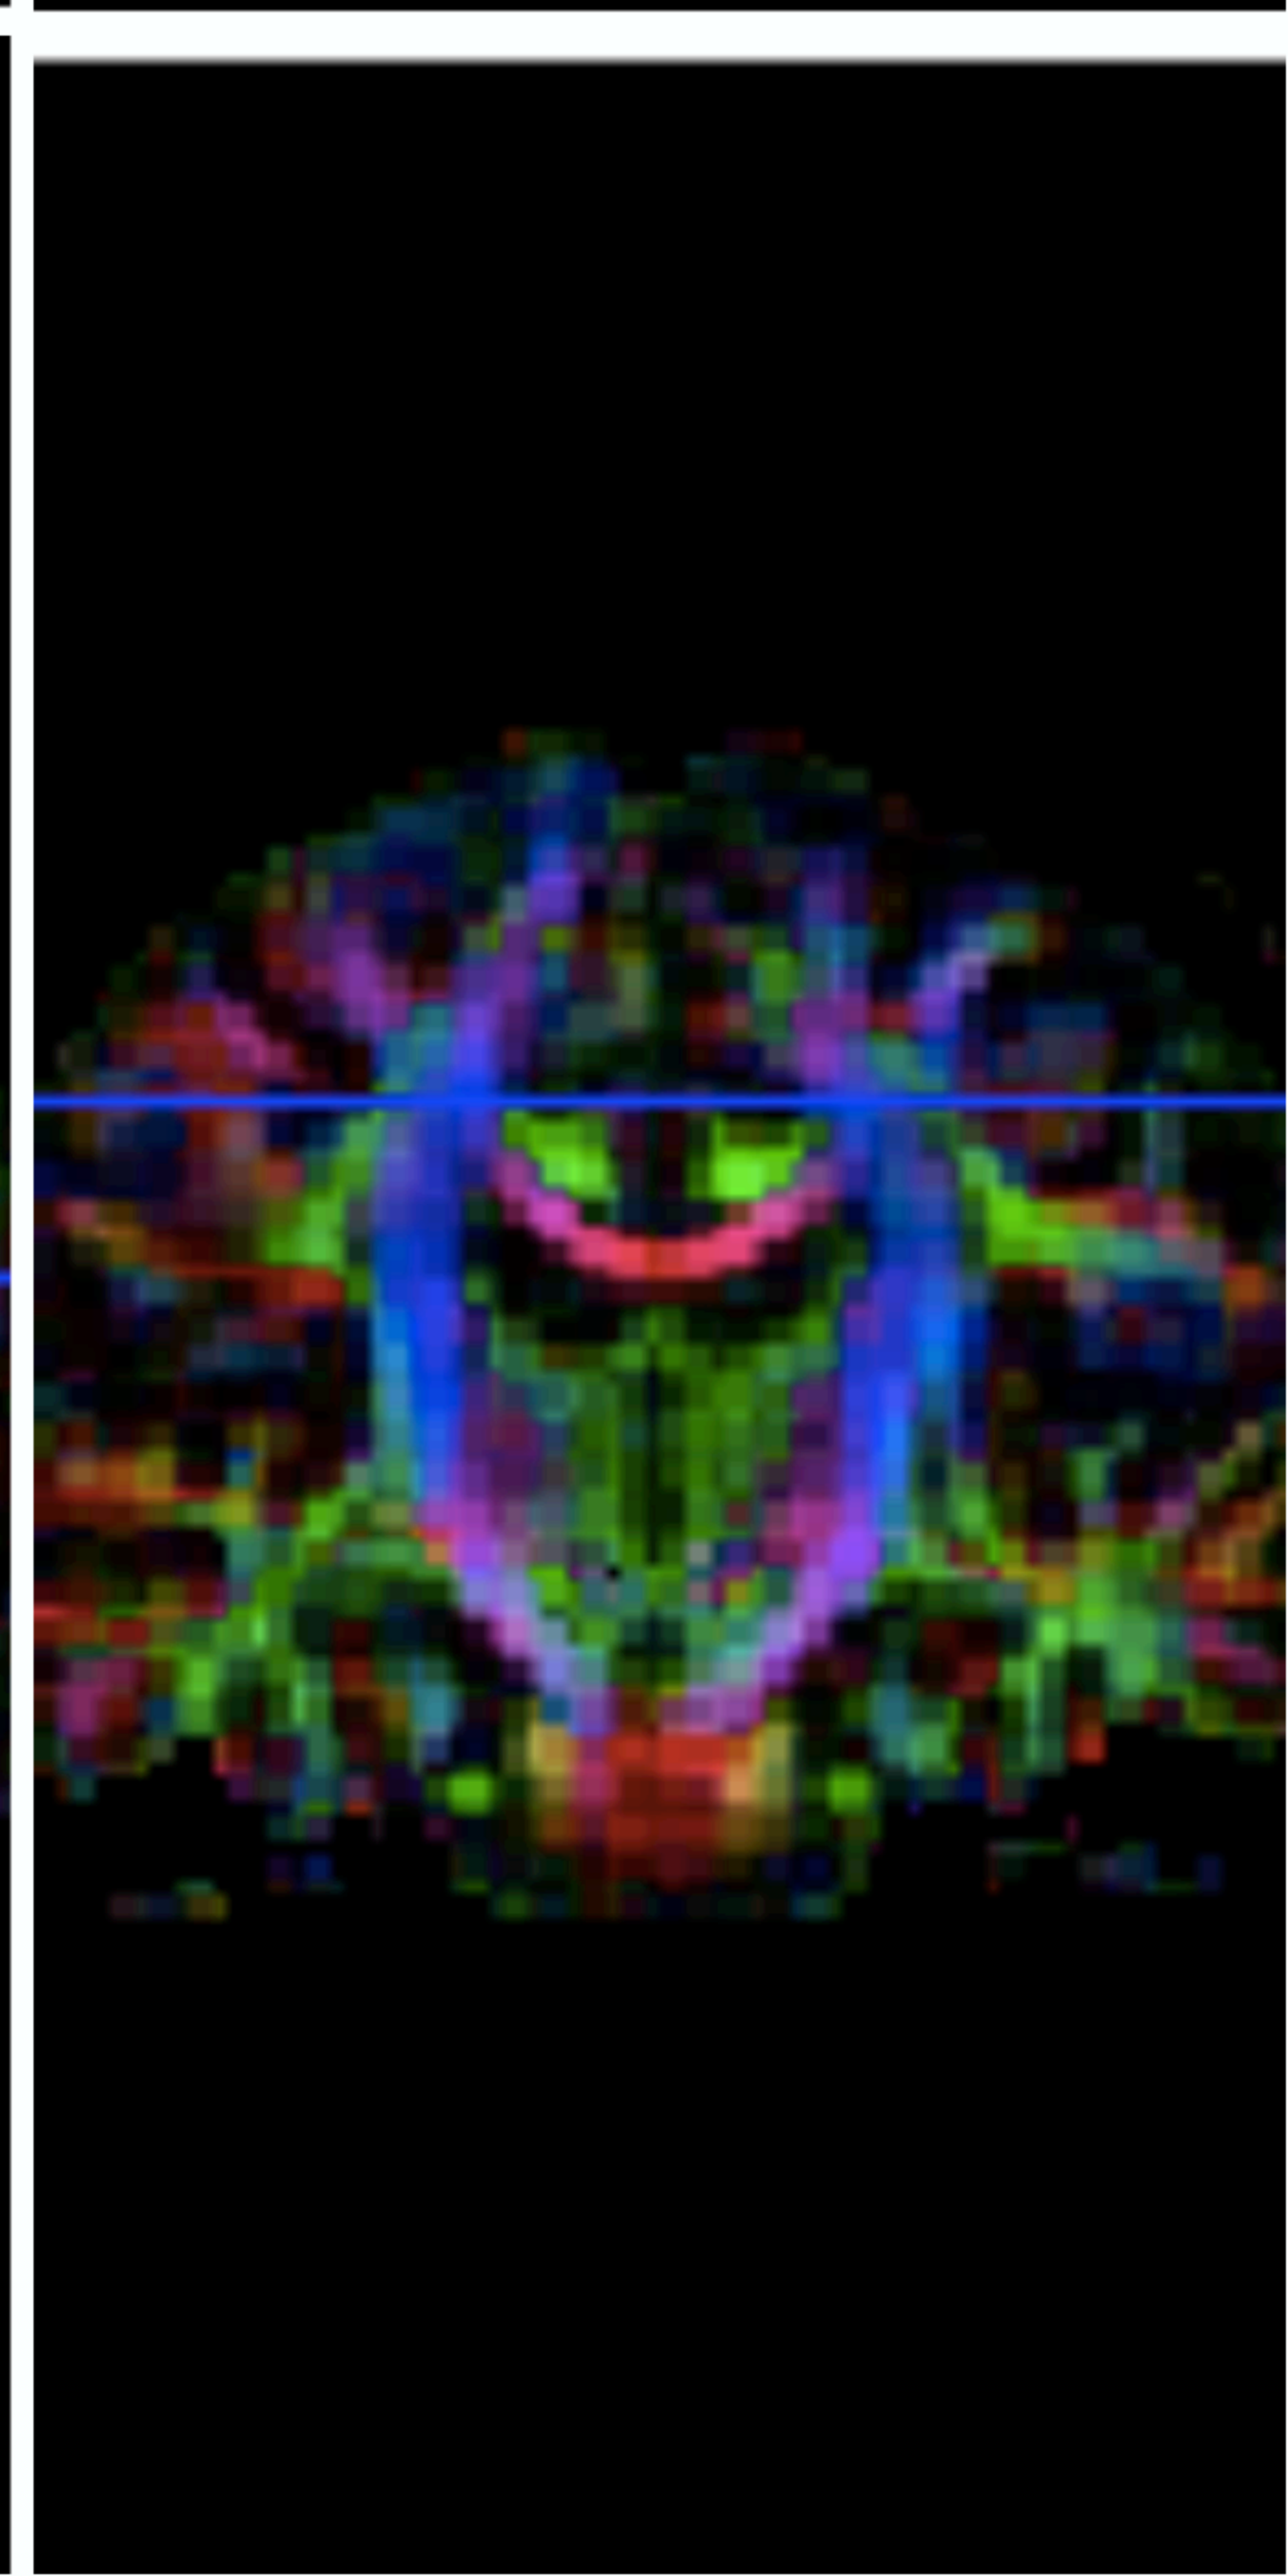

b.

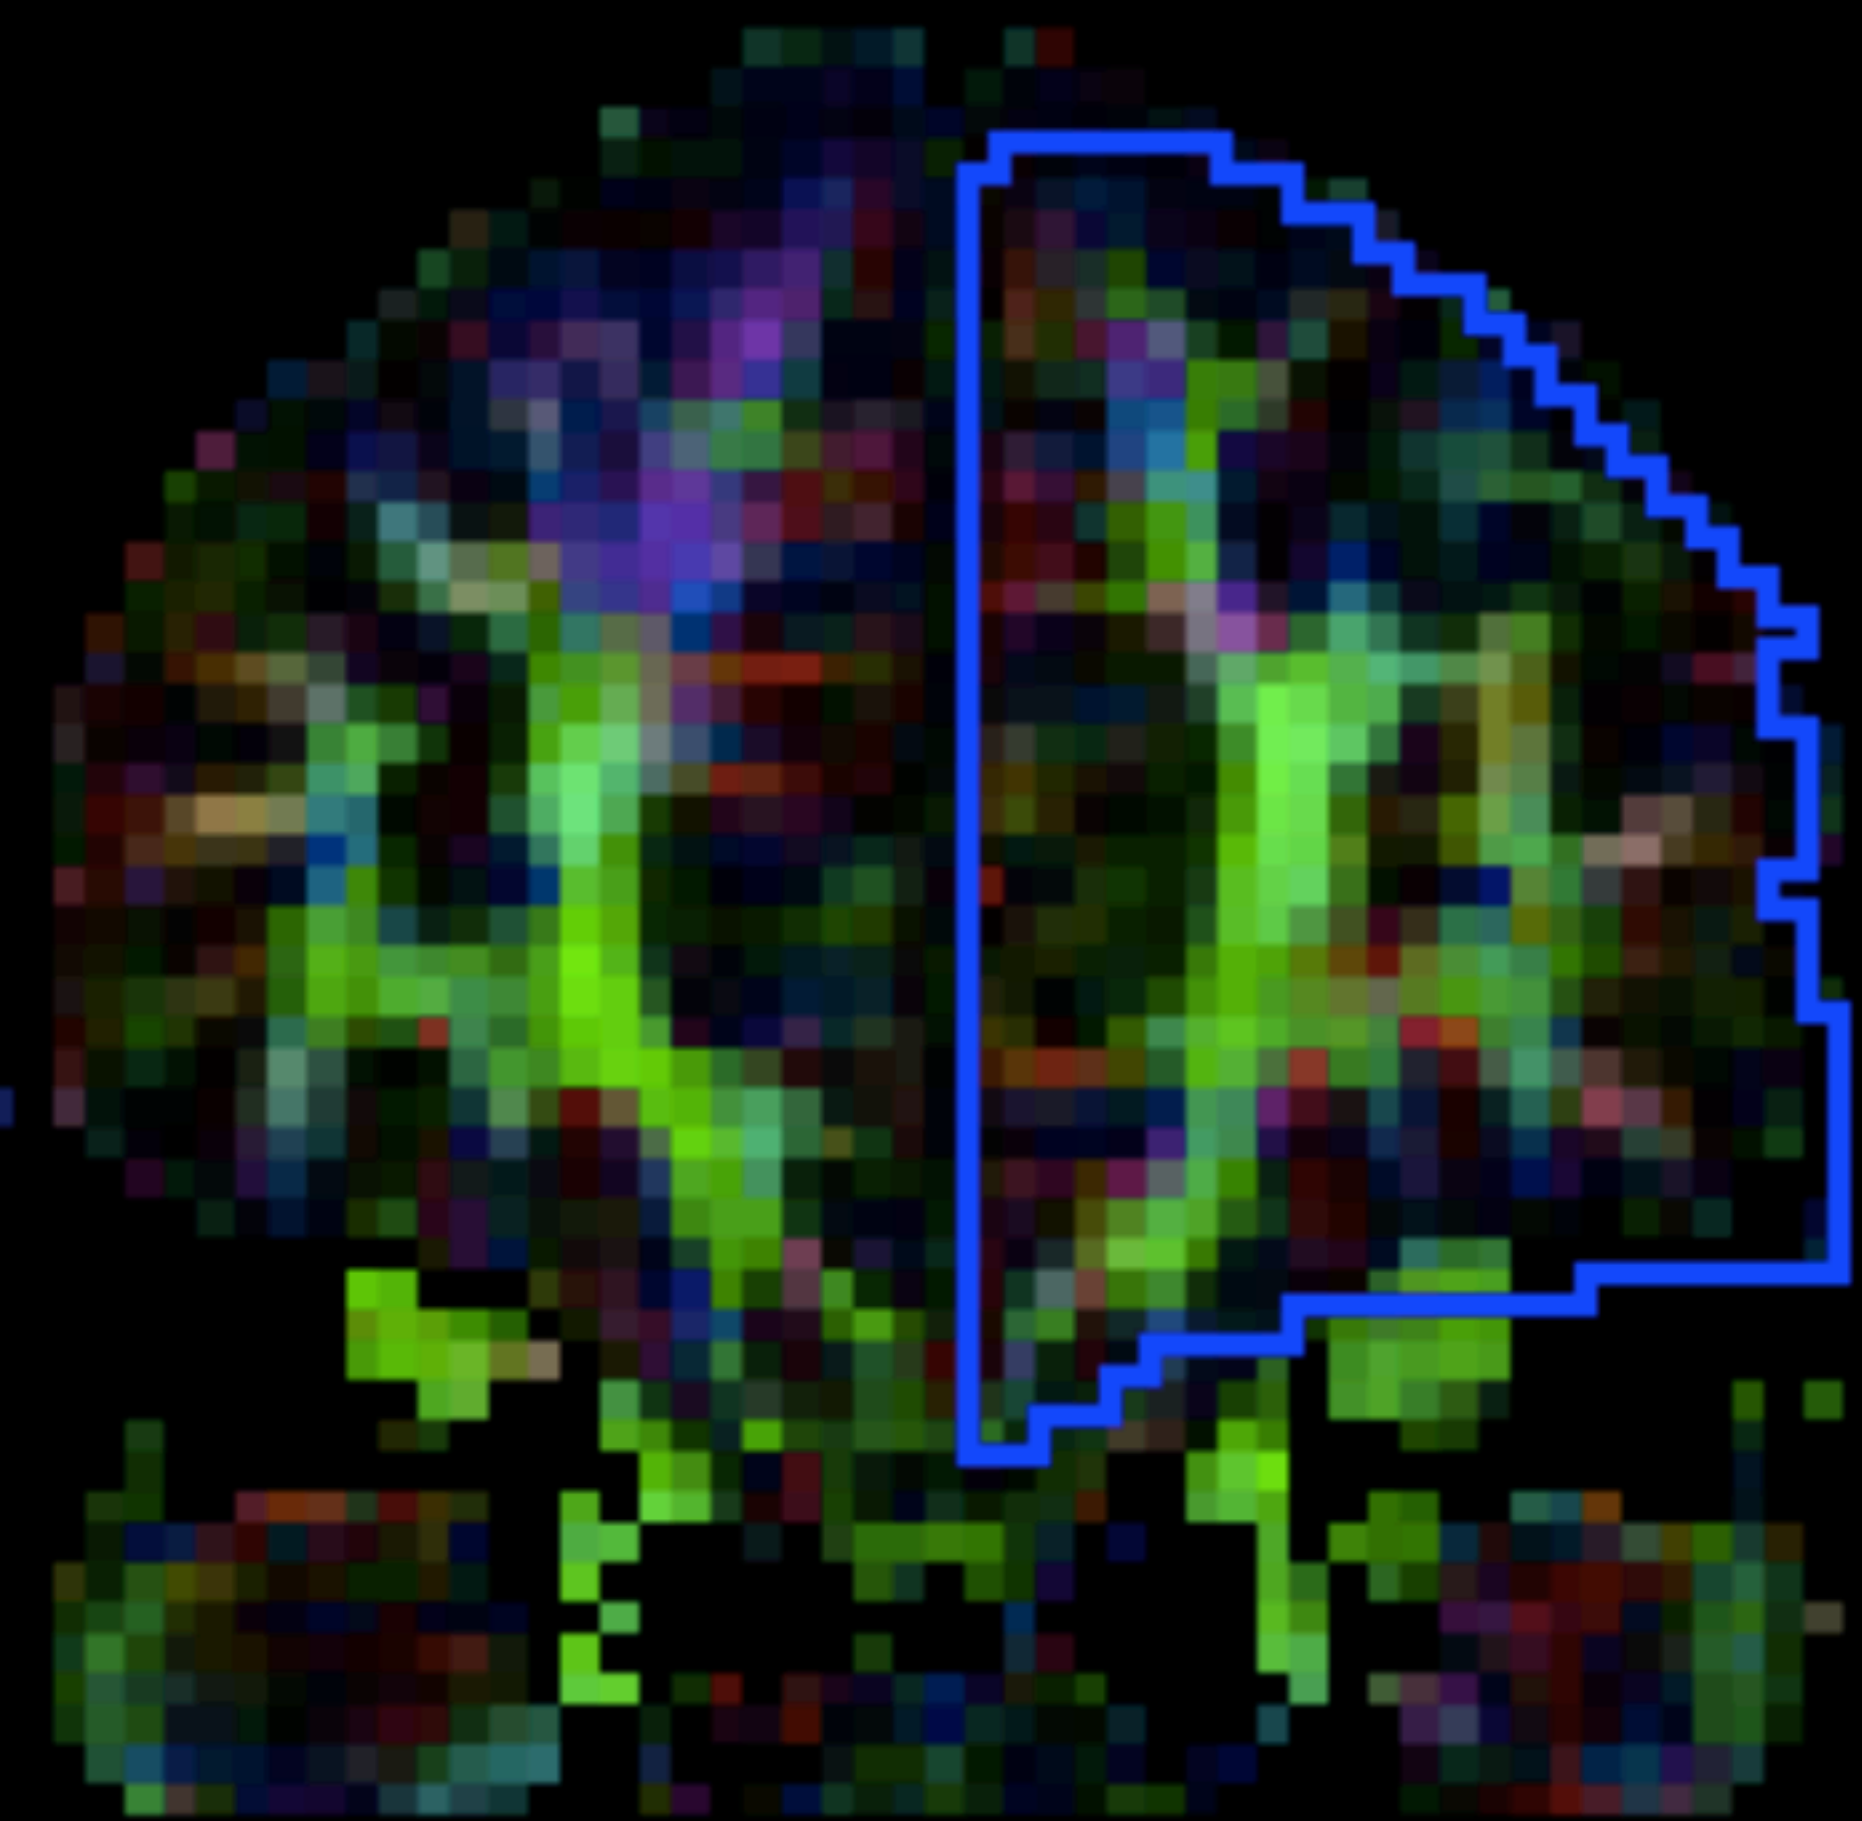

ROI 1

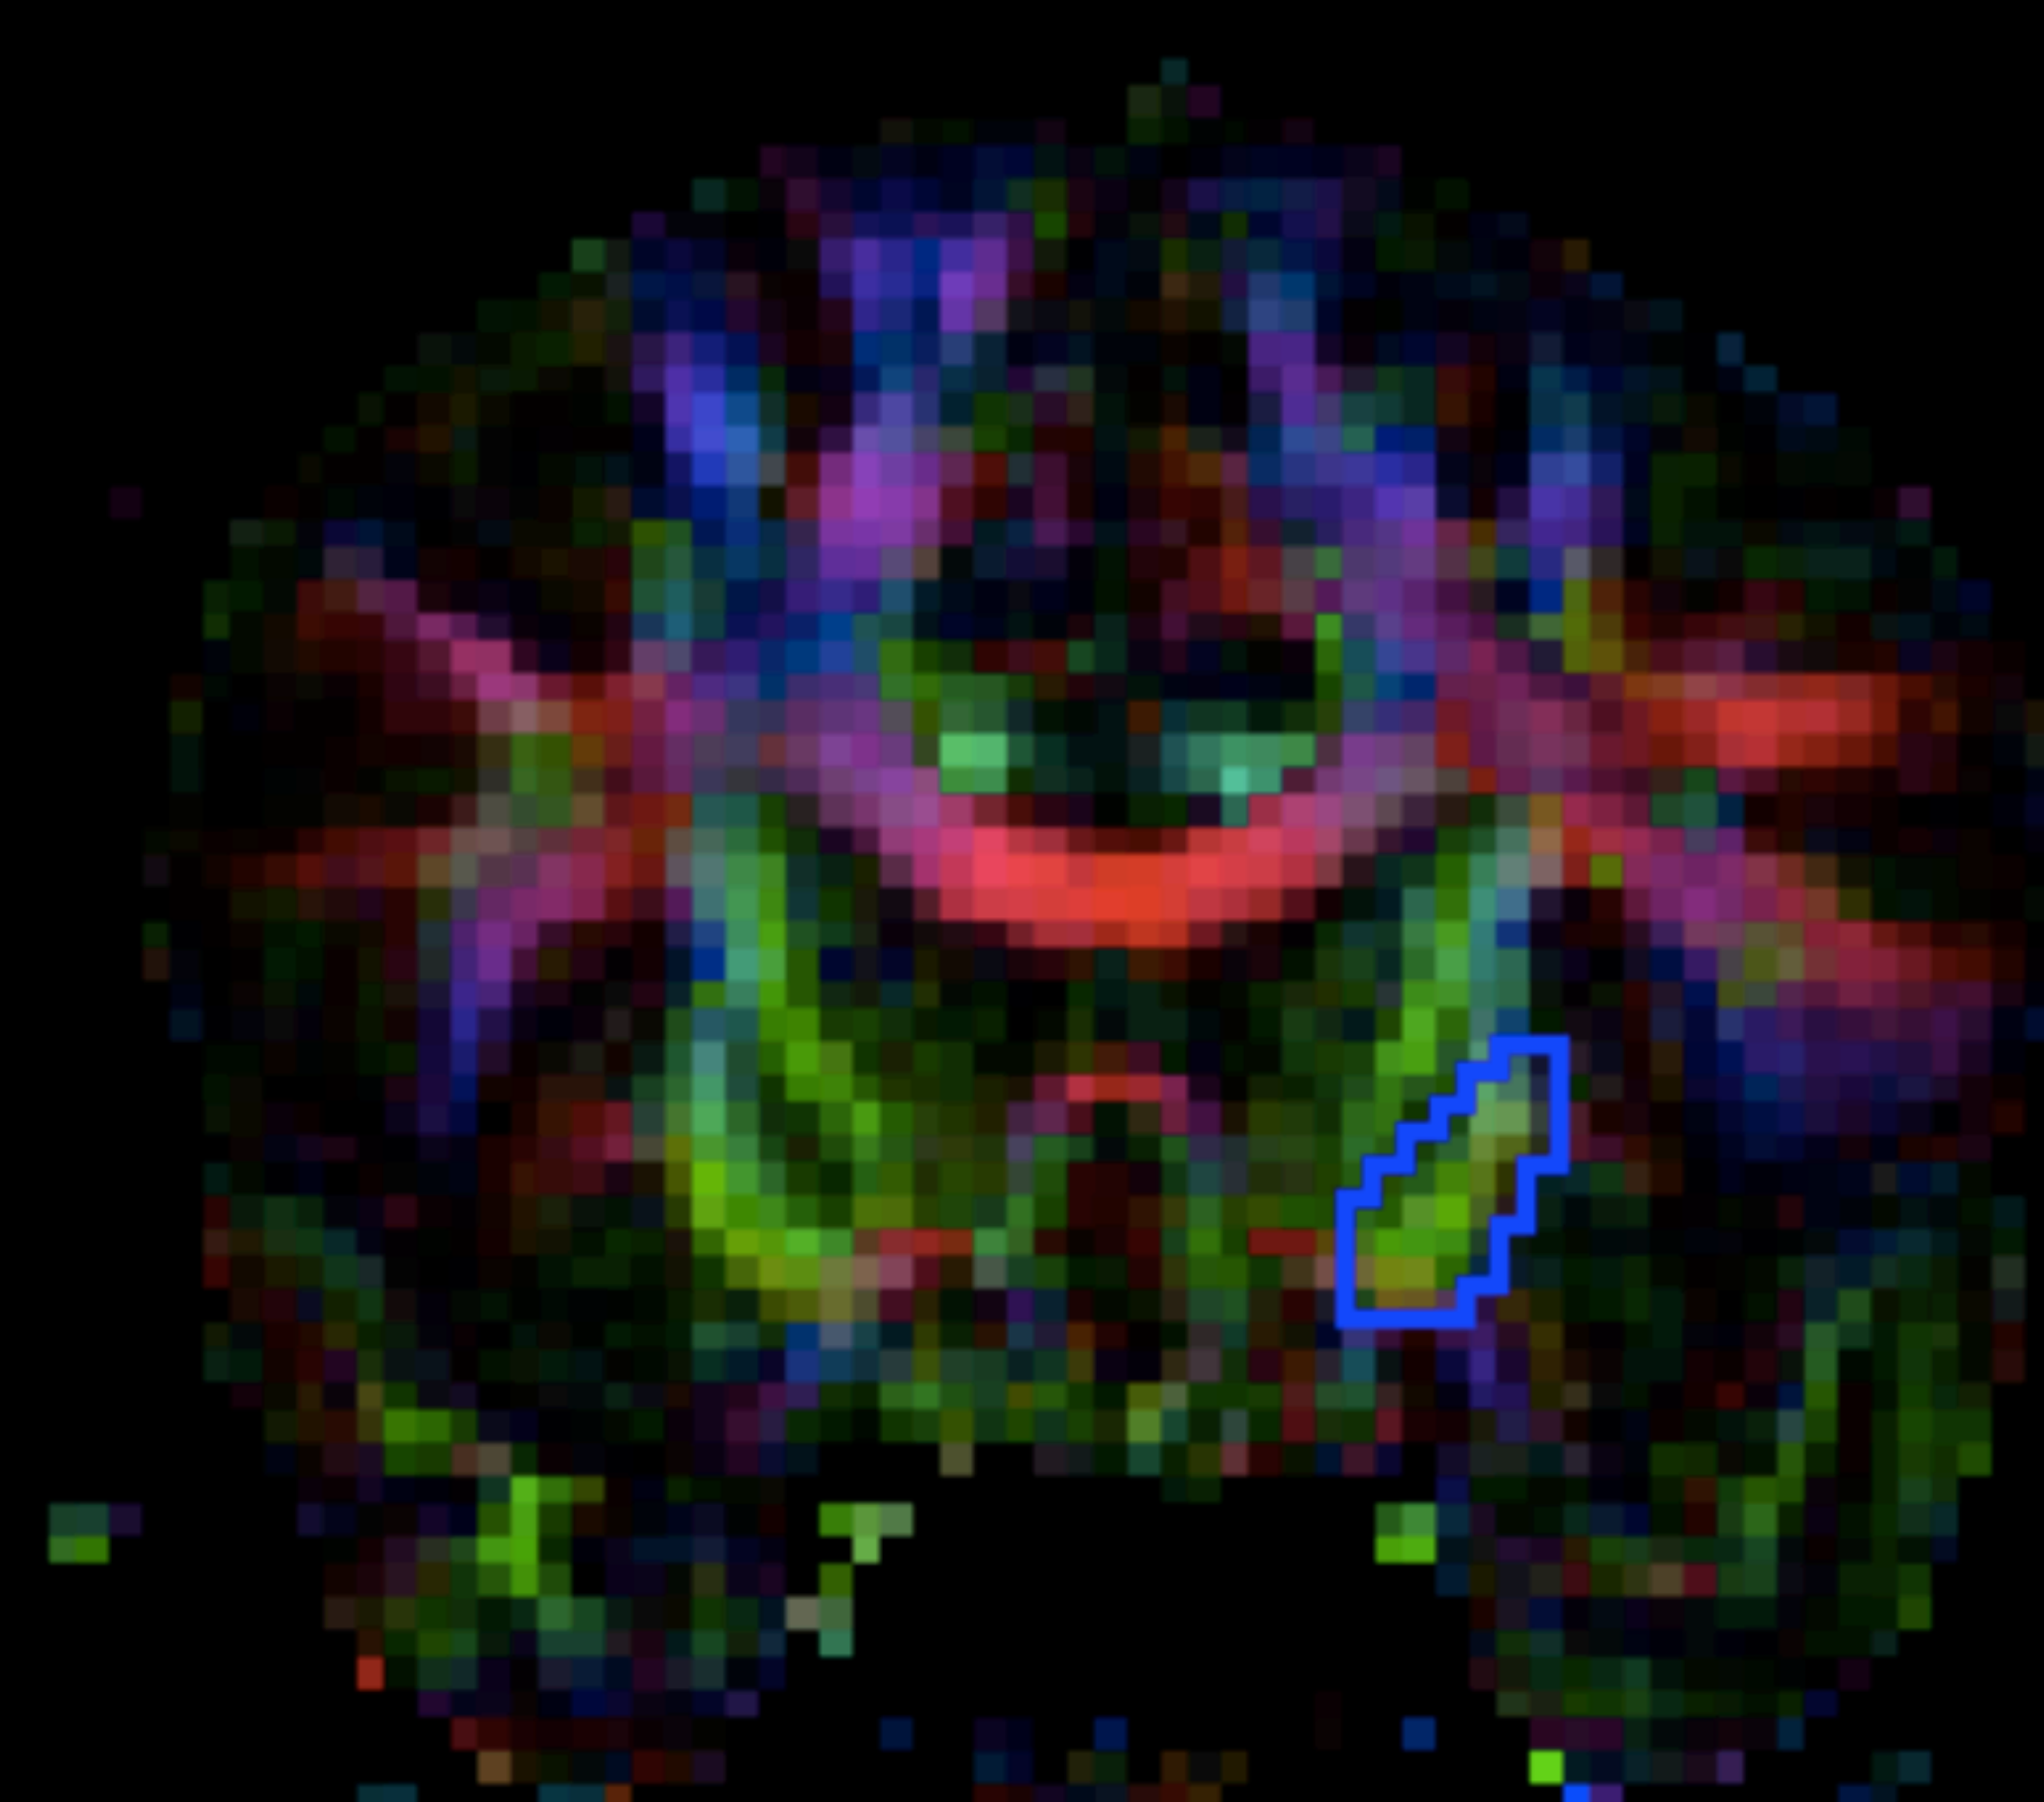

ROI 2

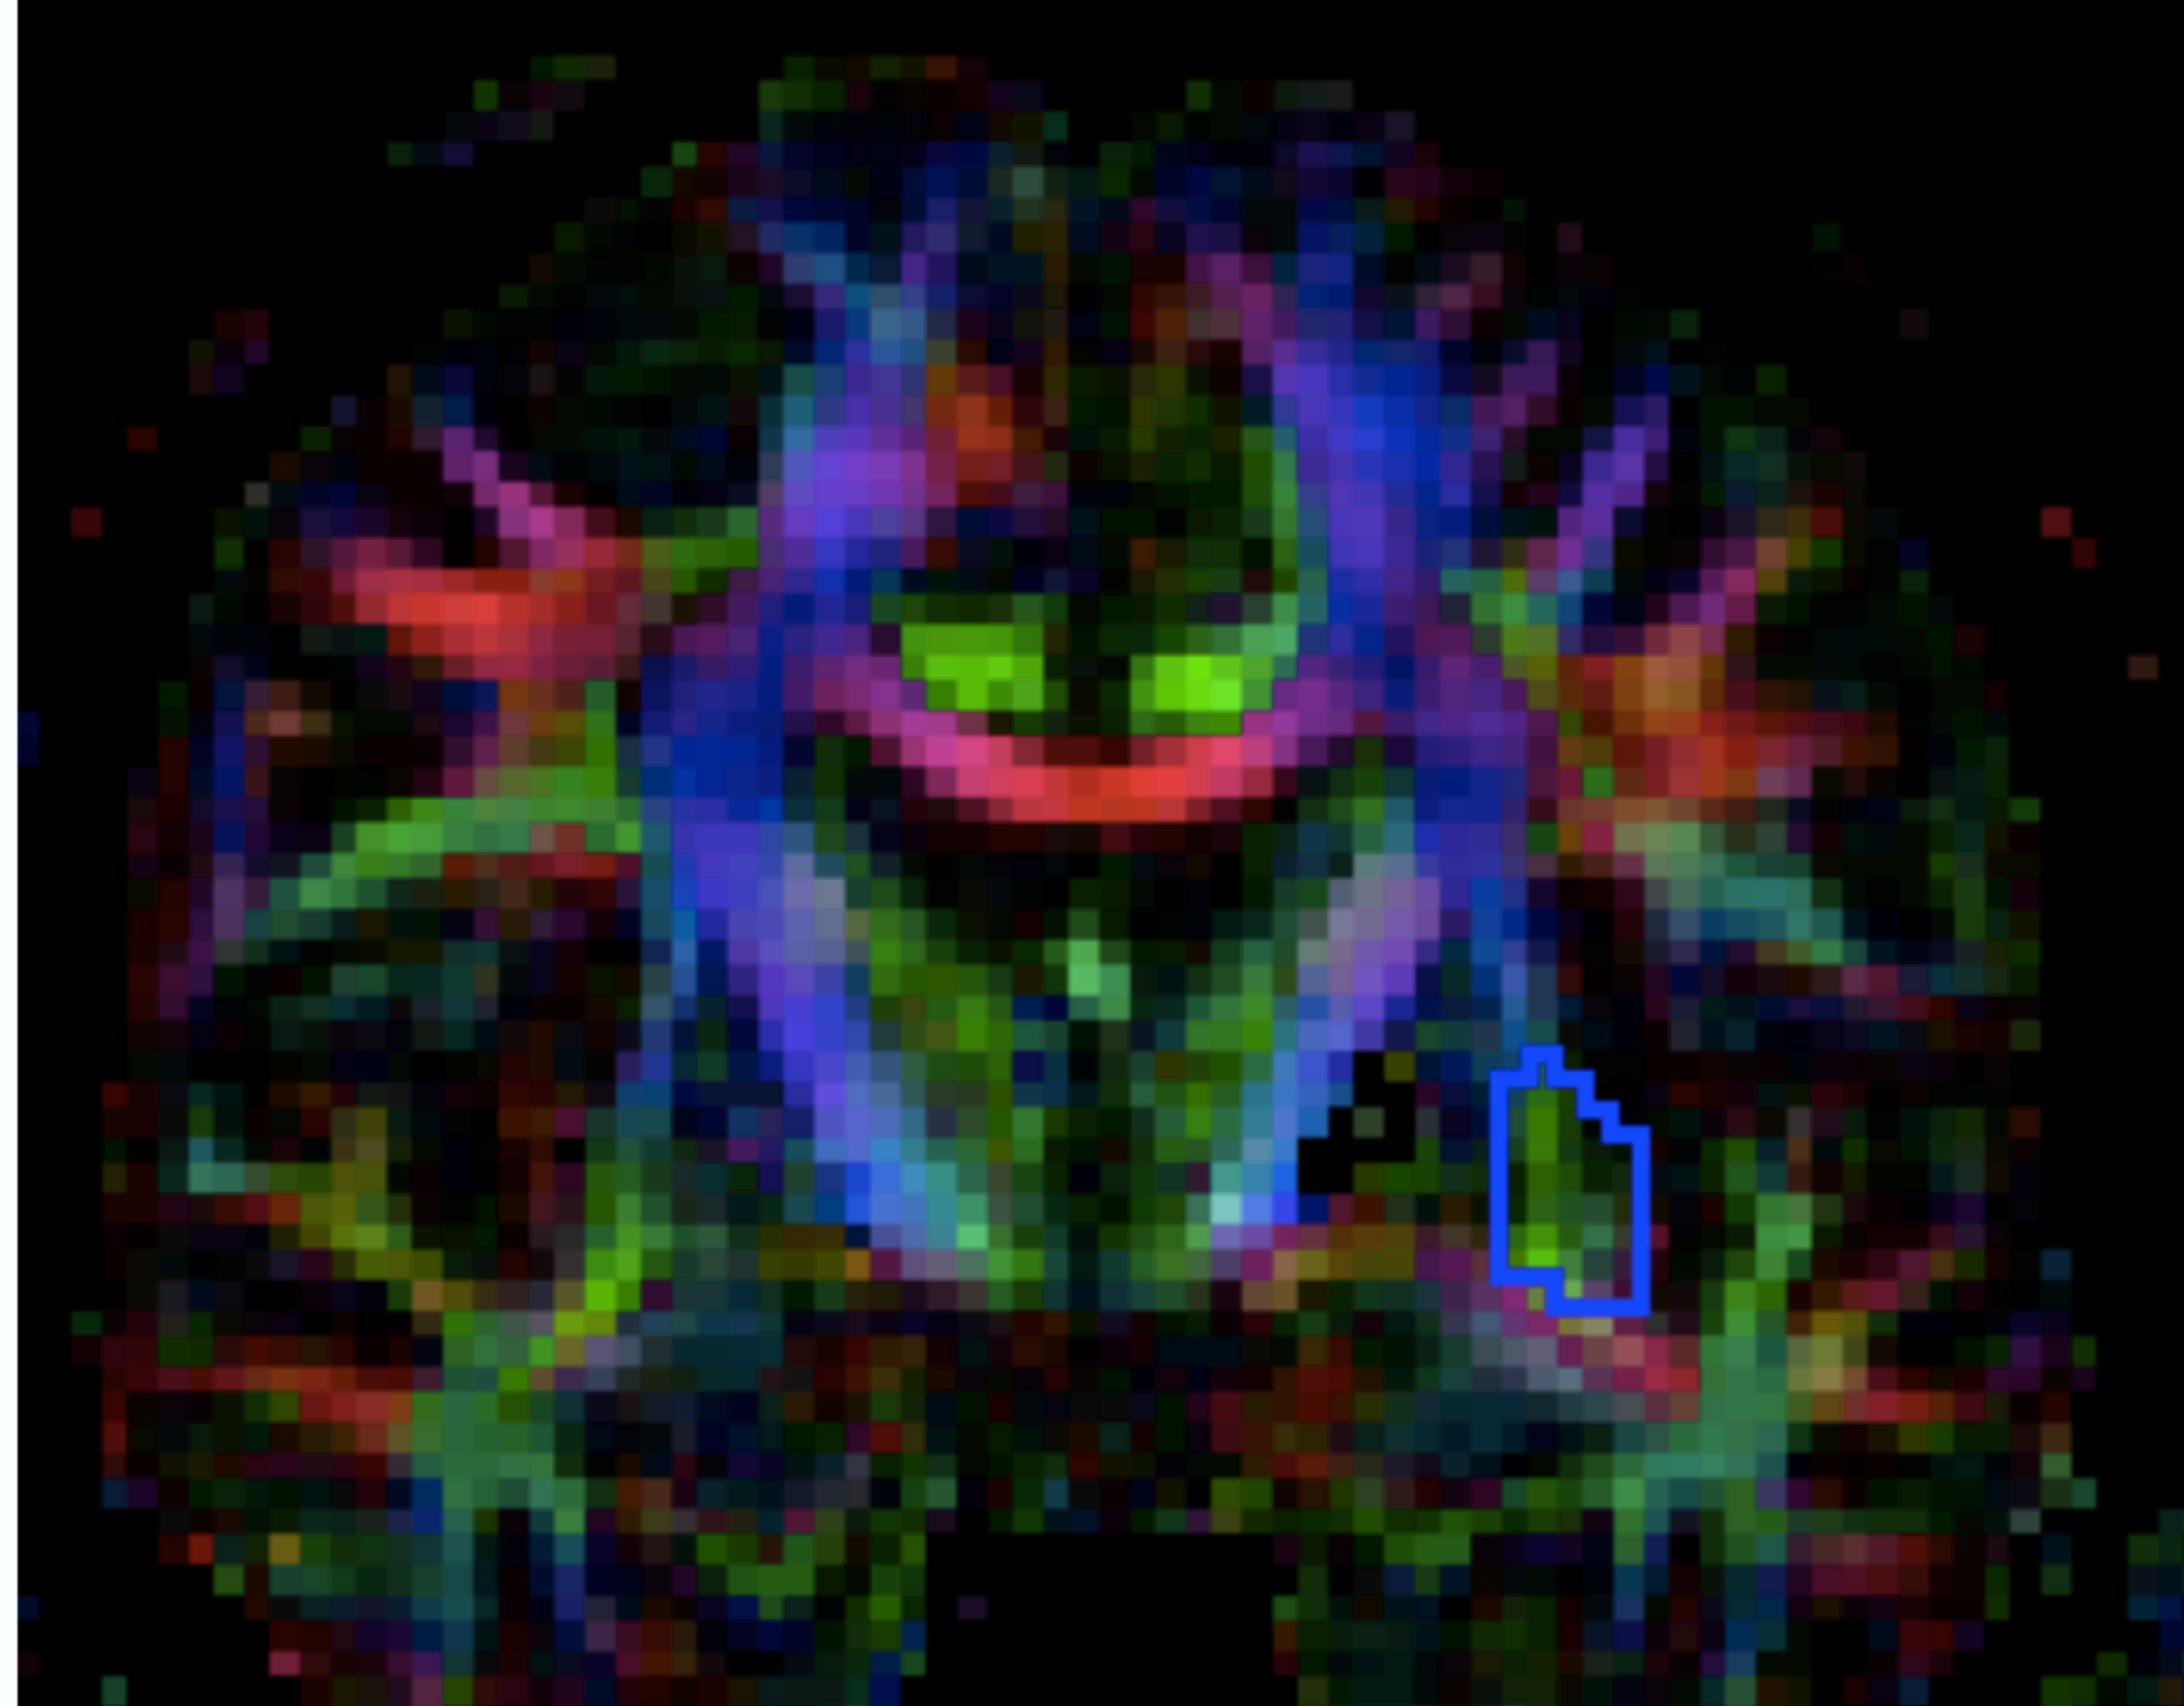

ROI 3

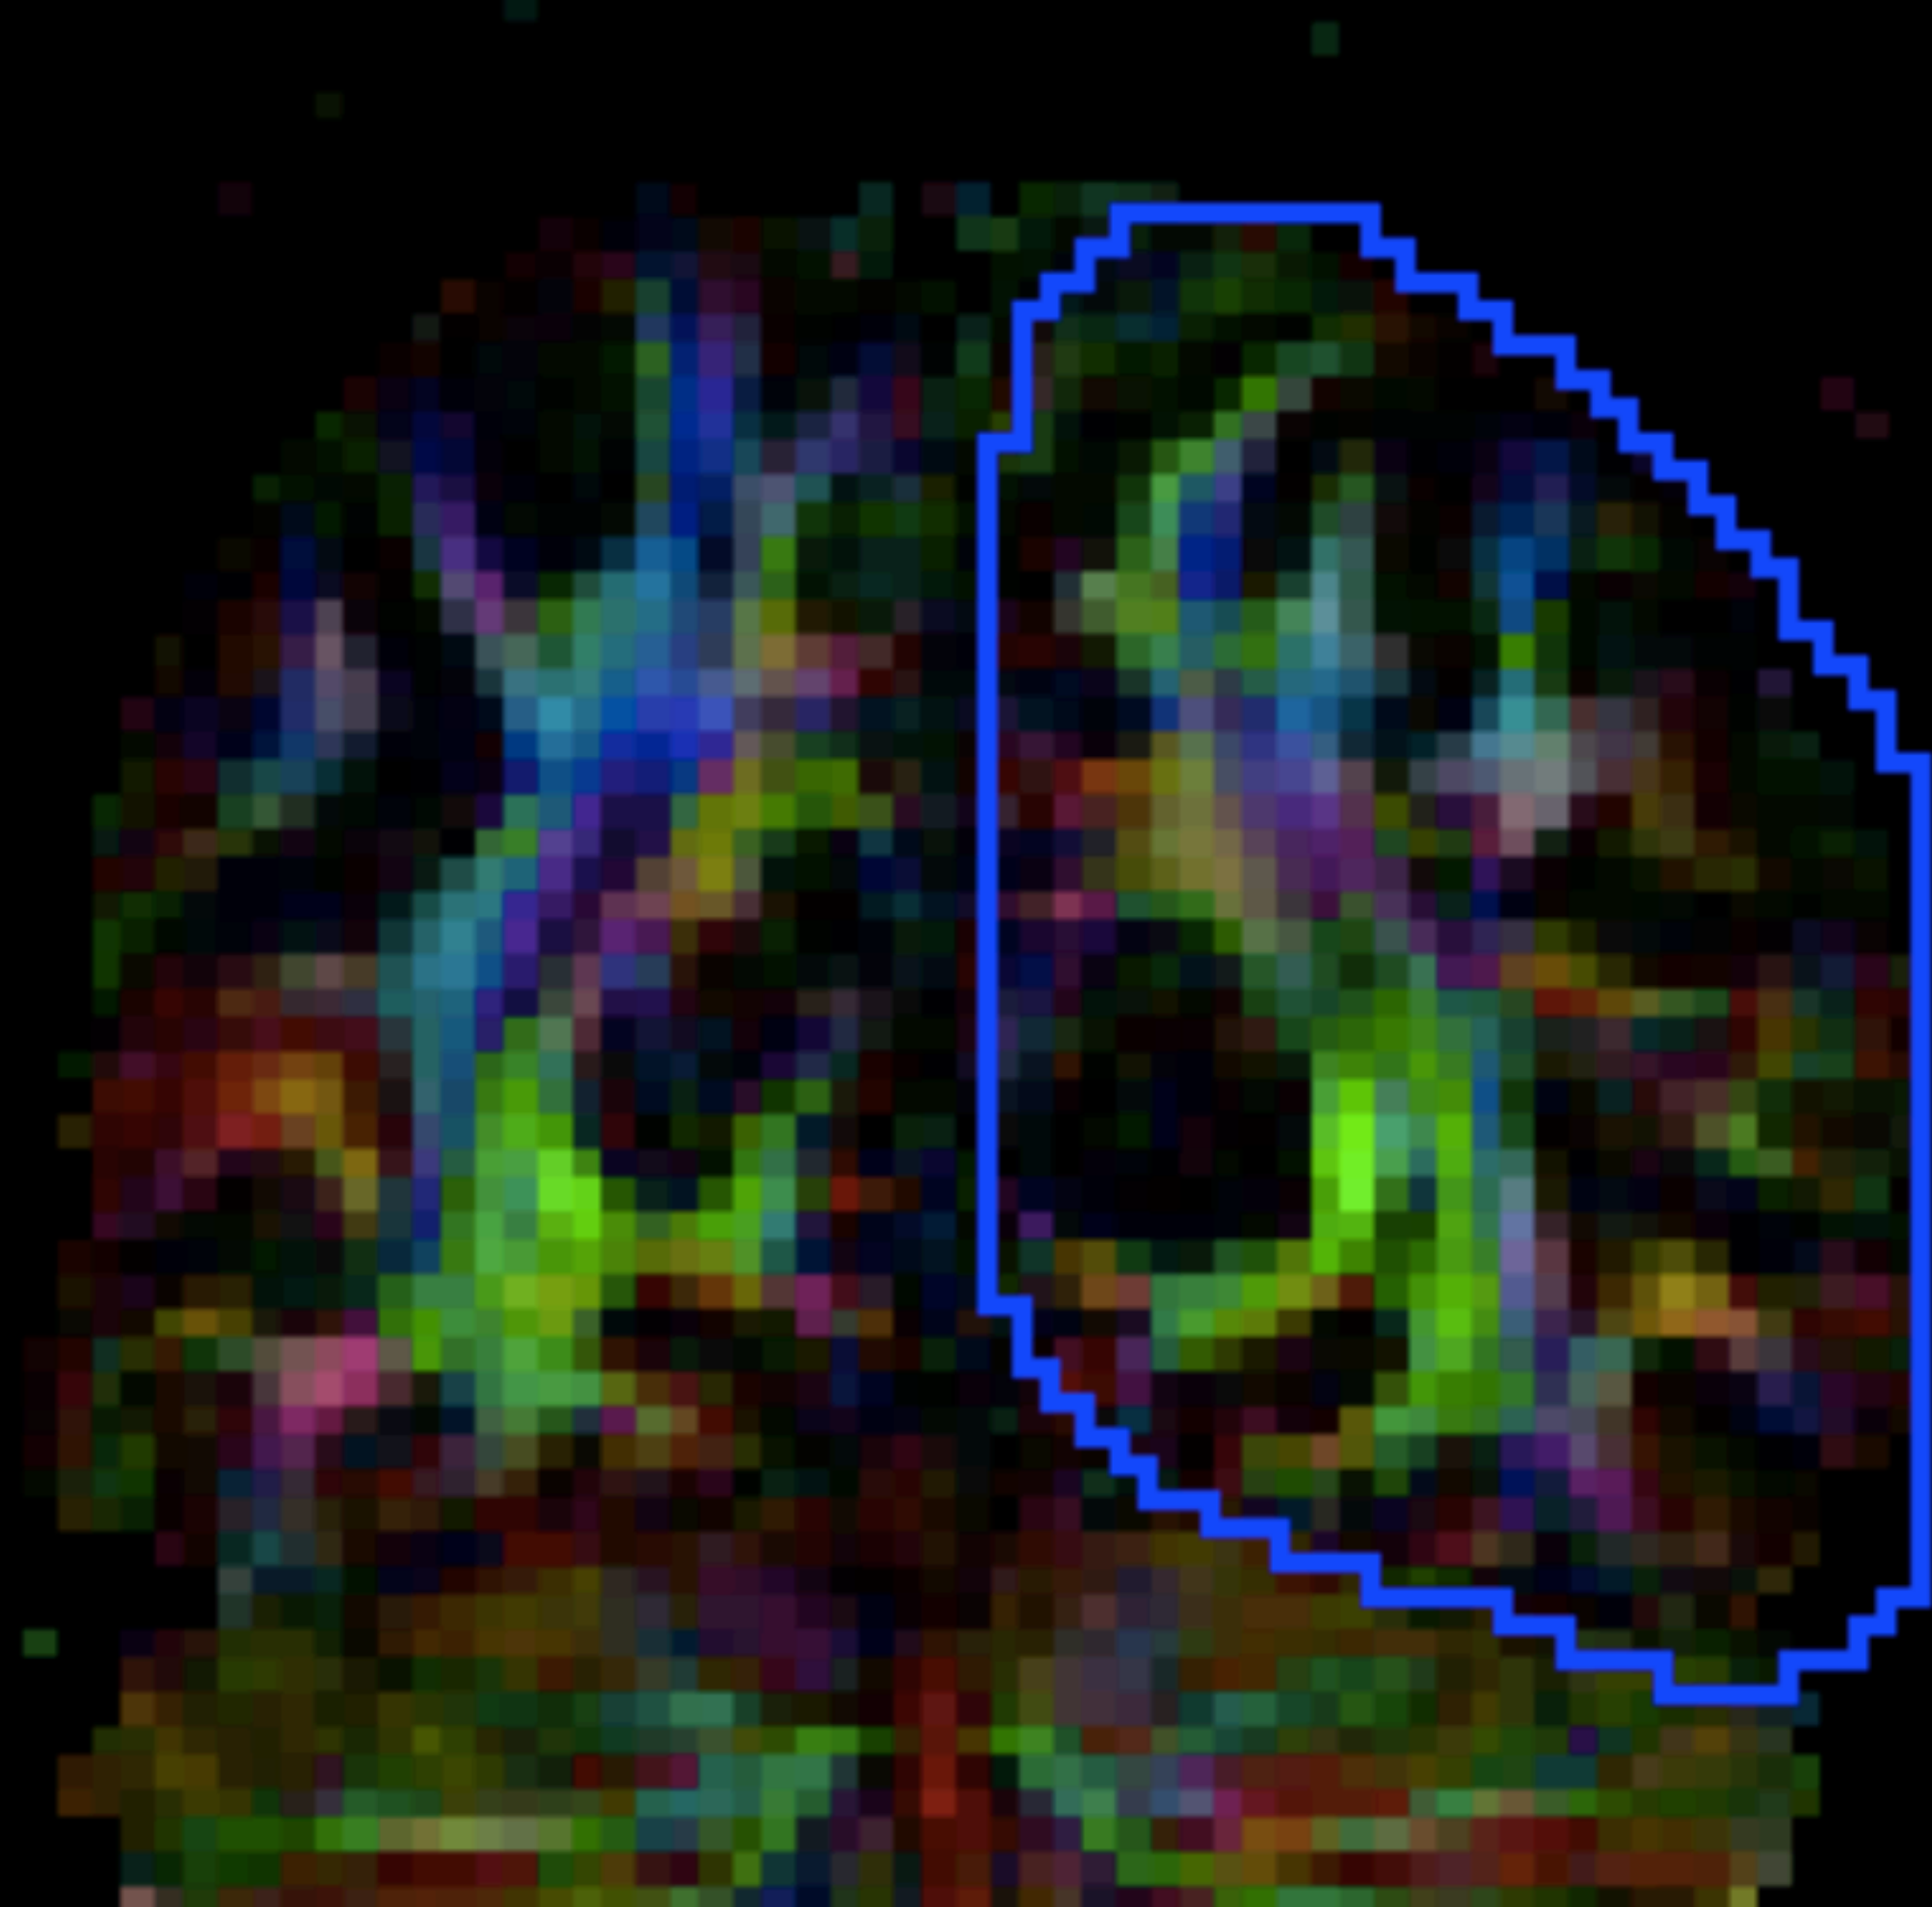

ROI 4

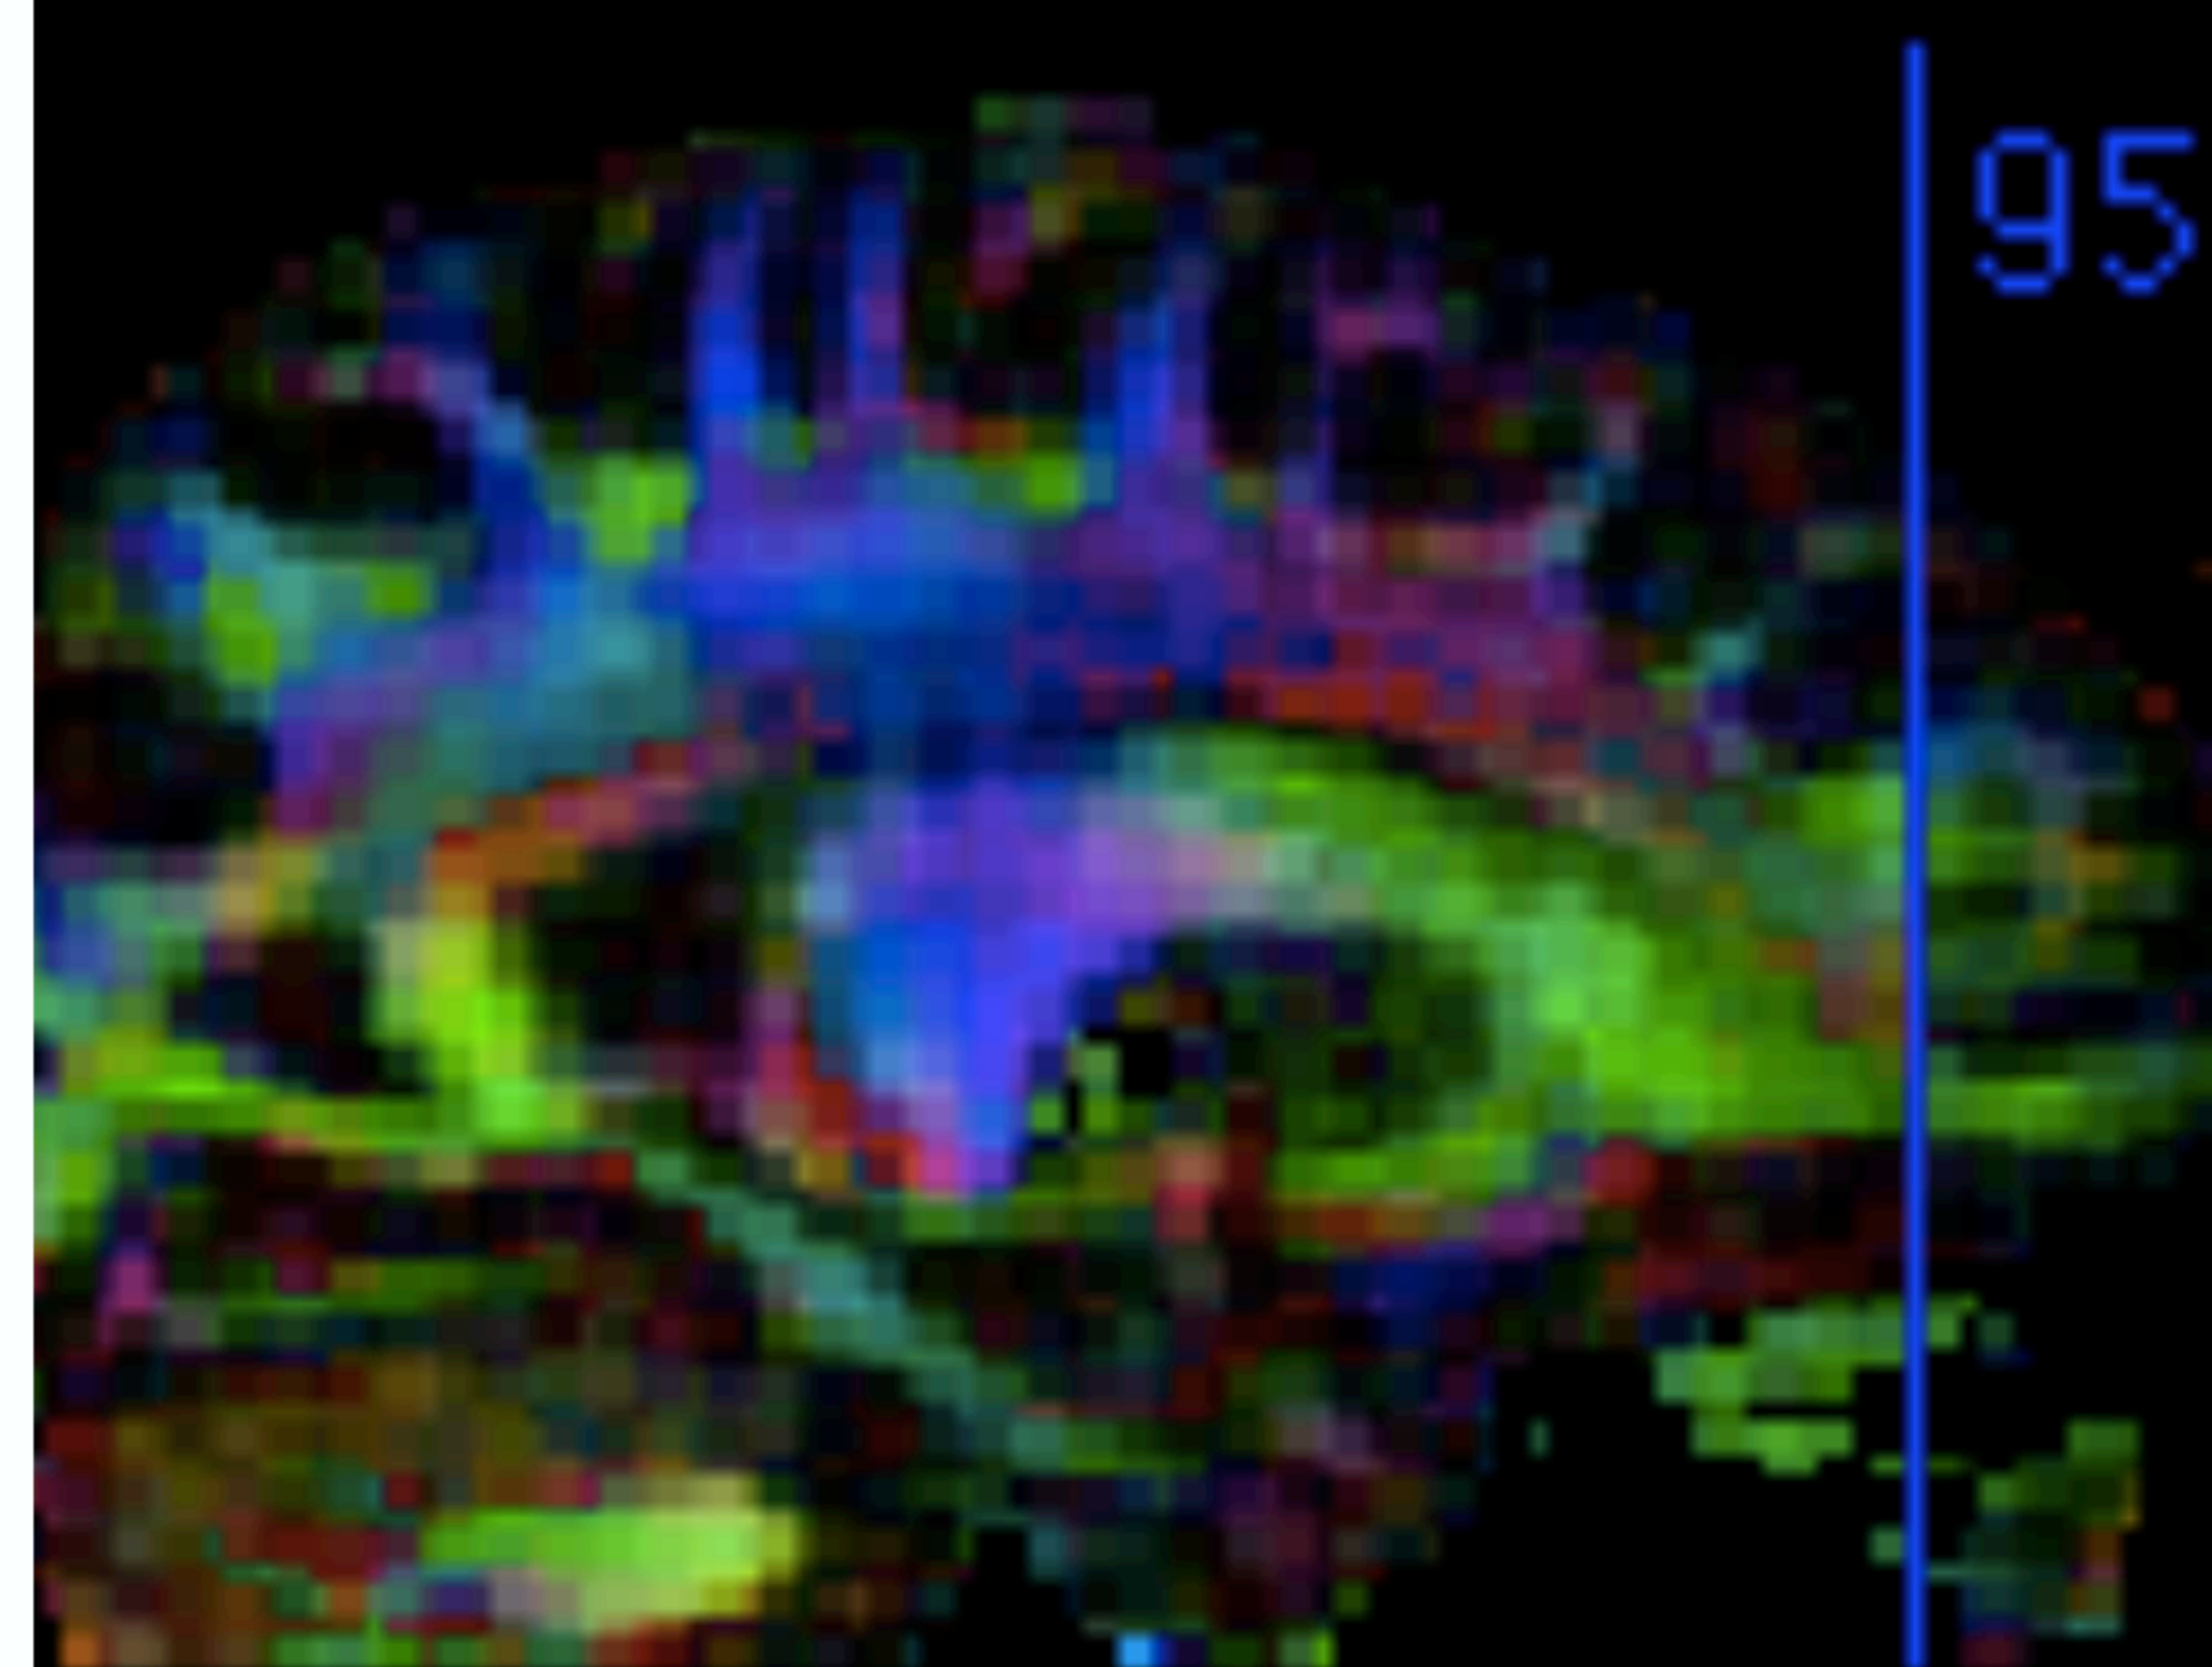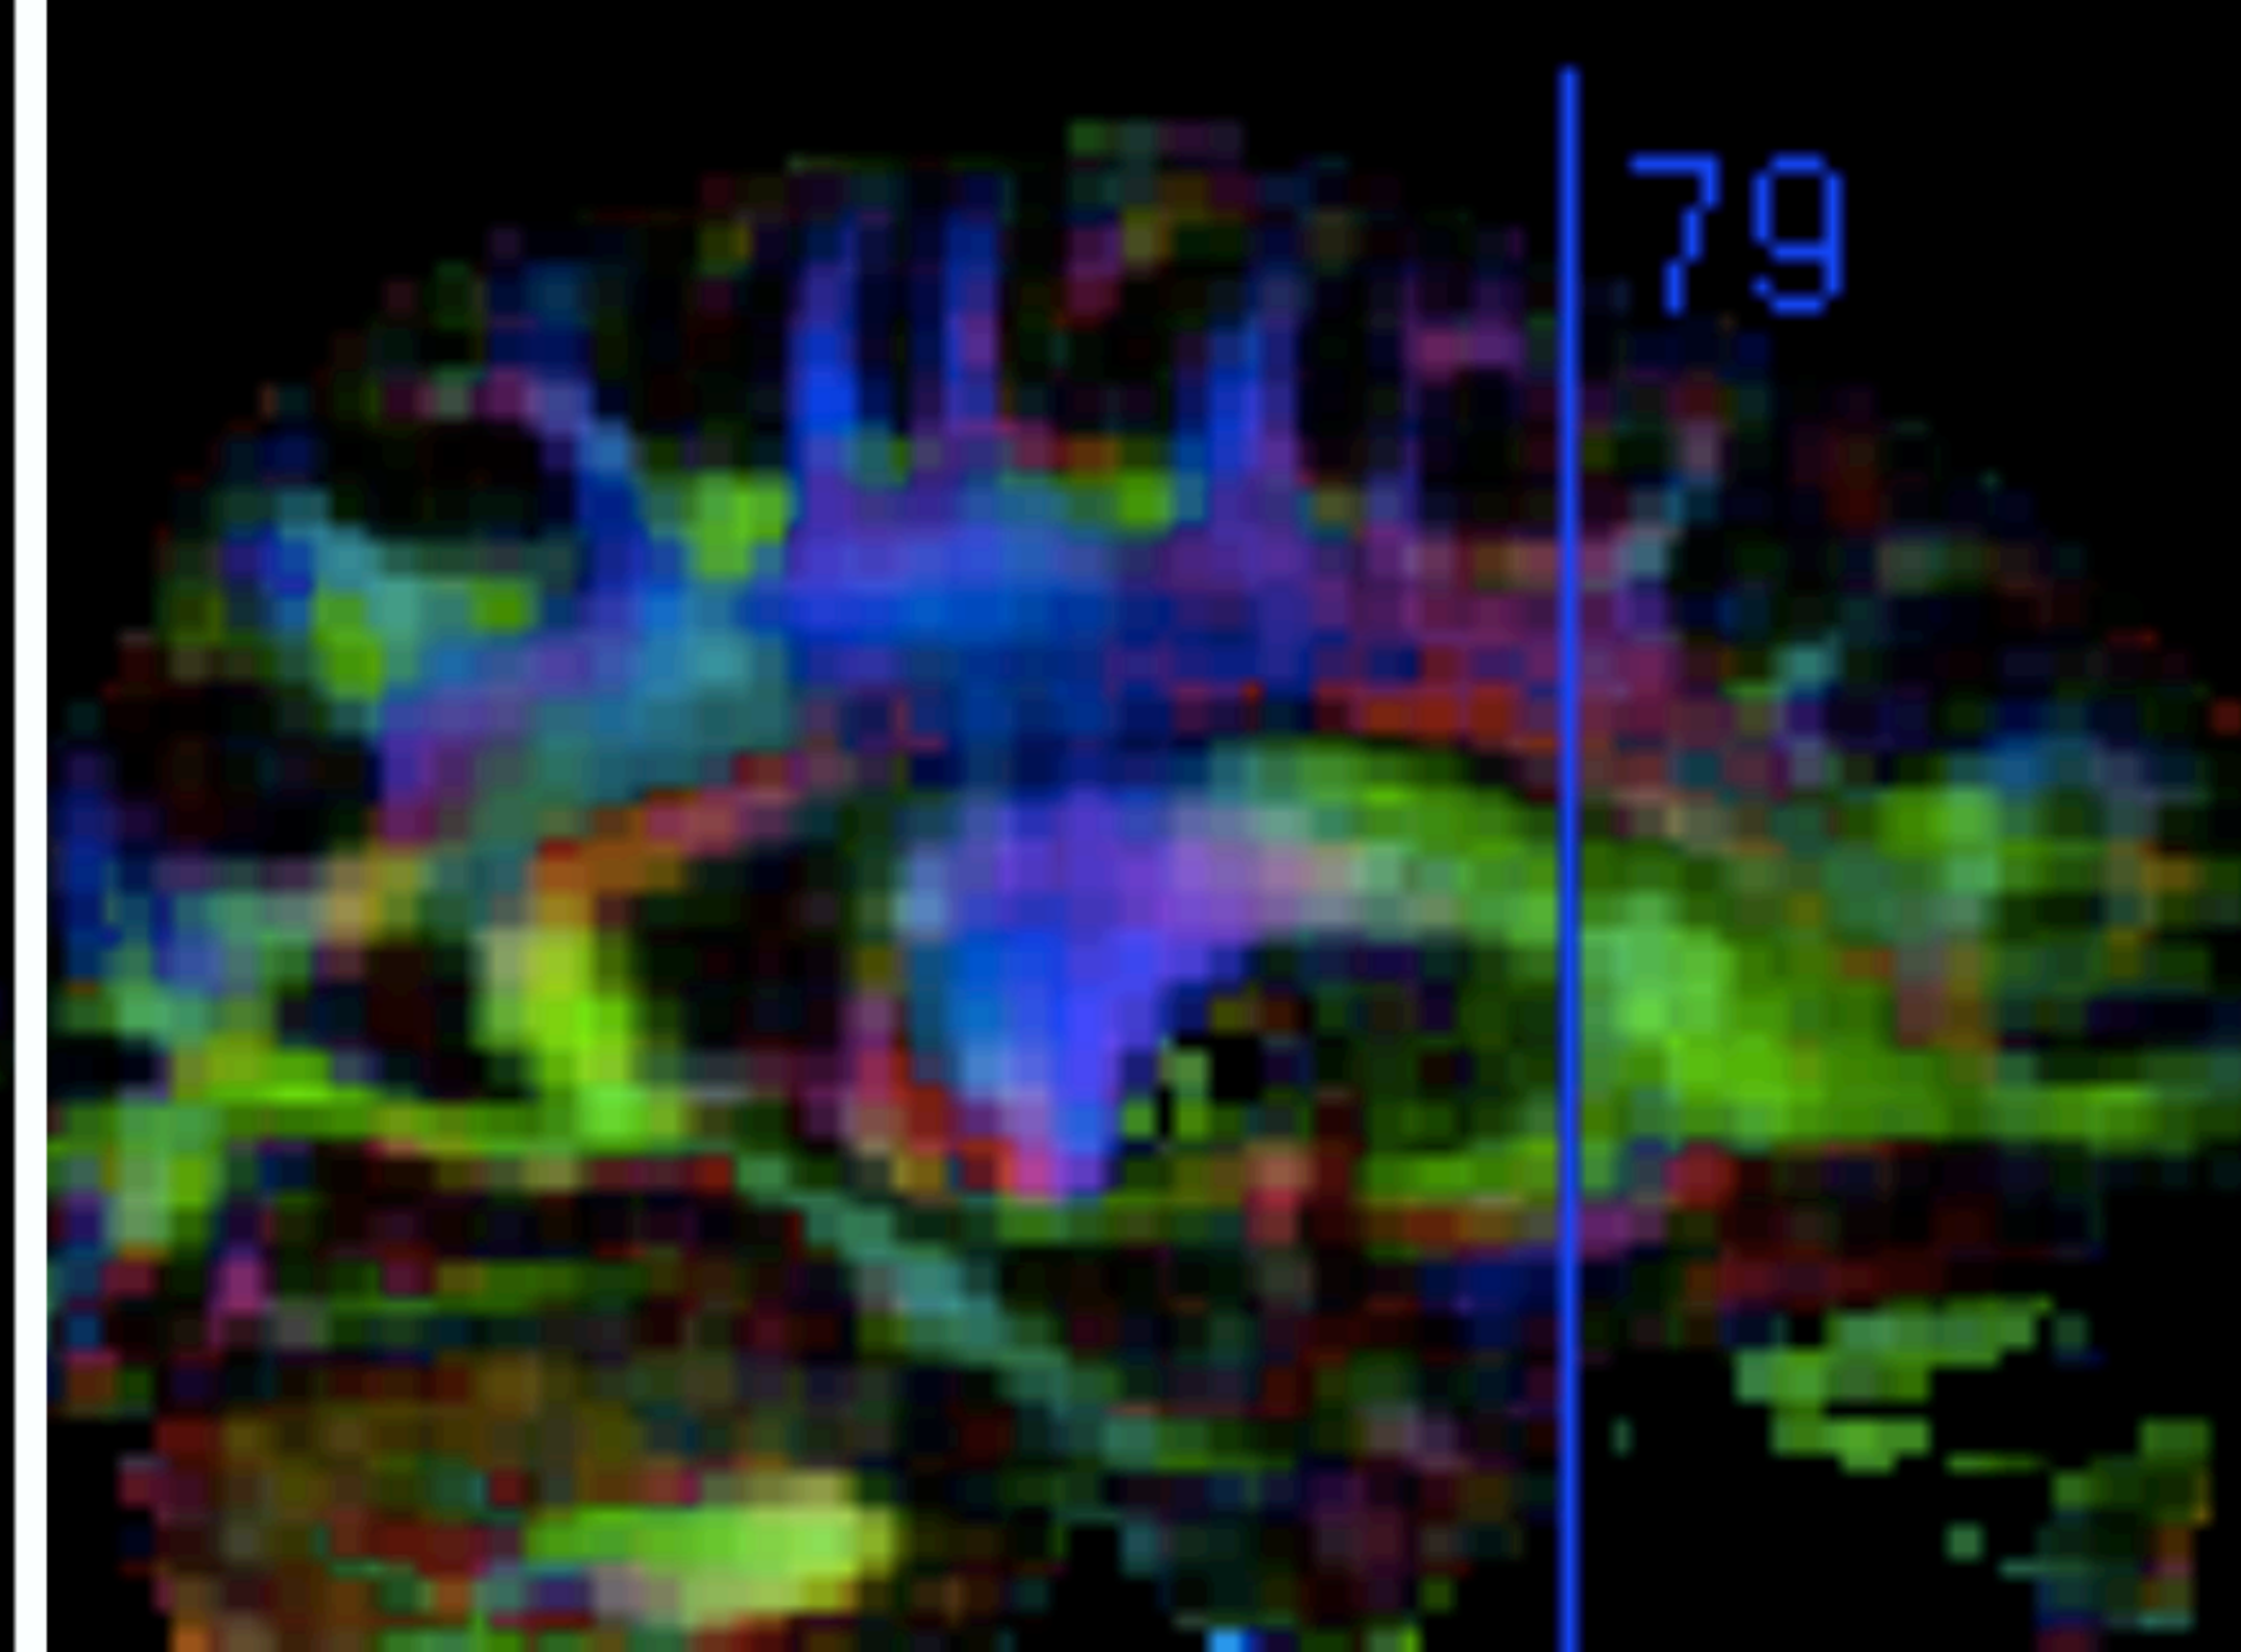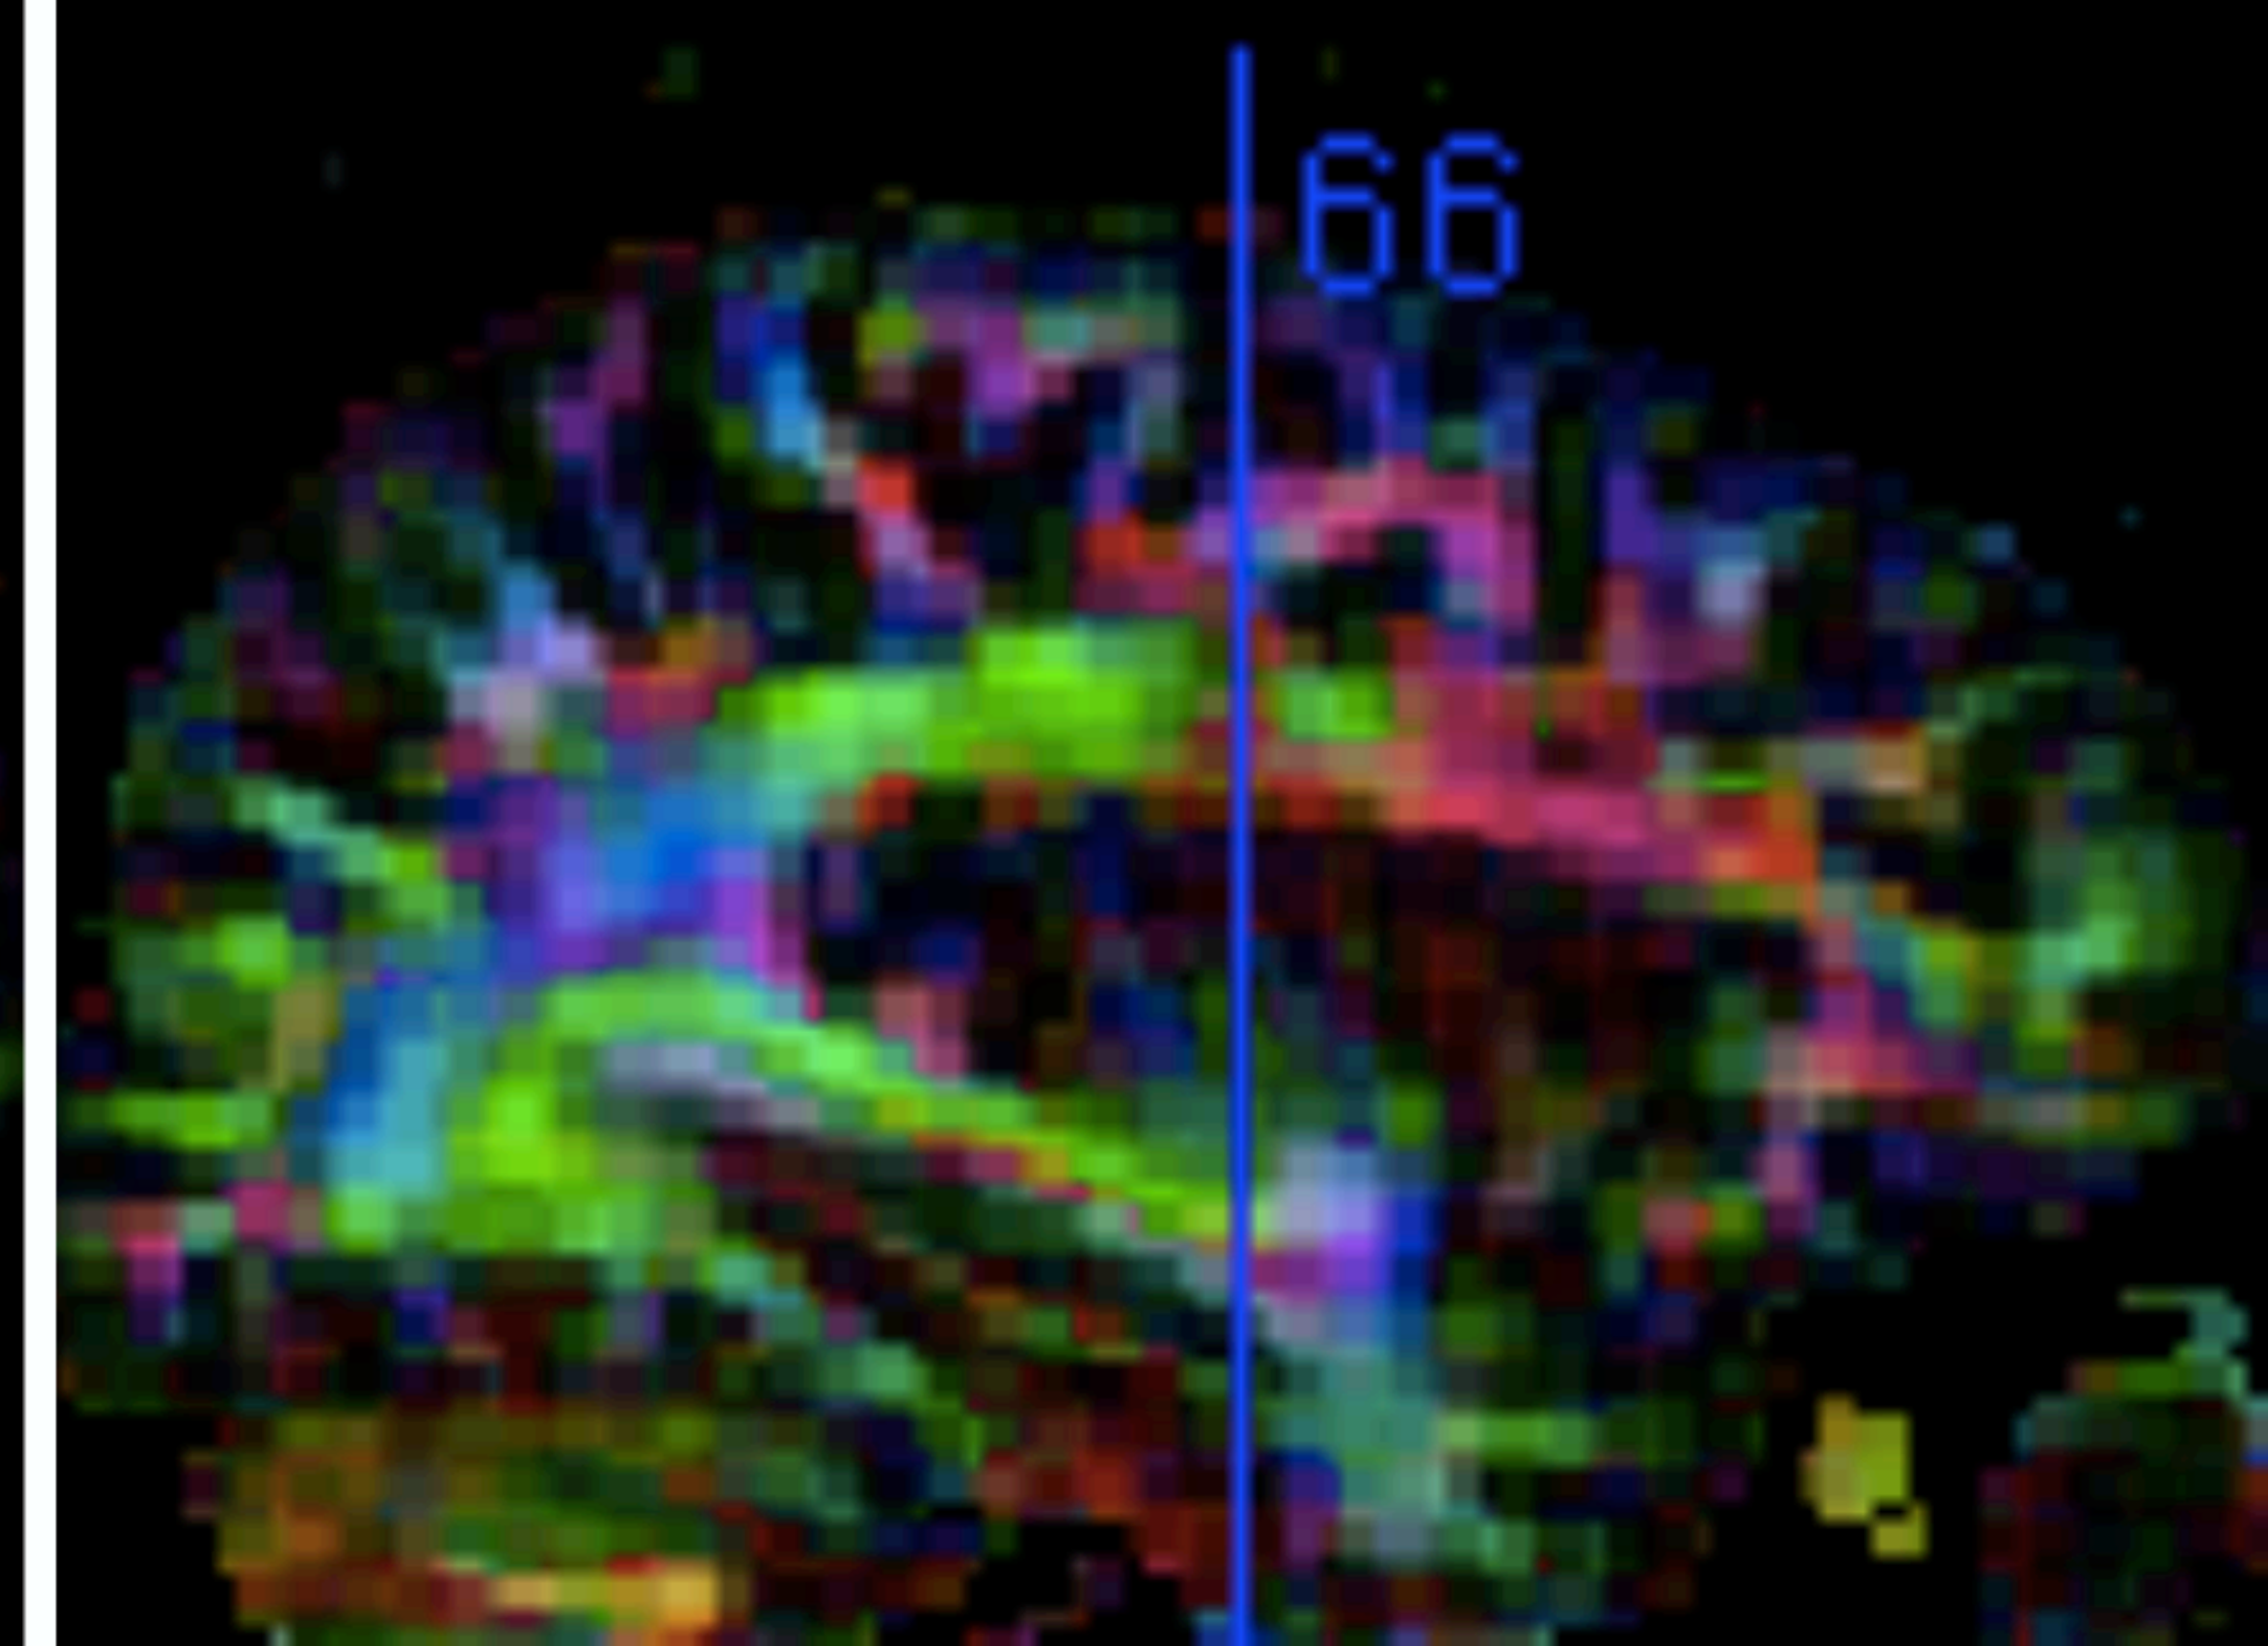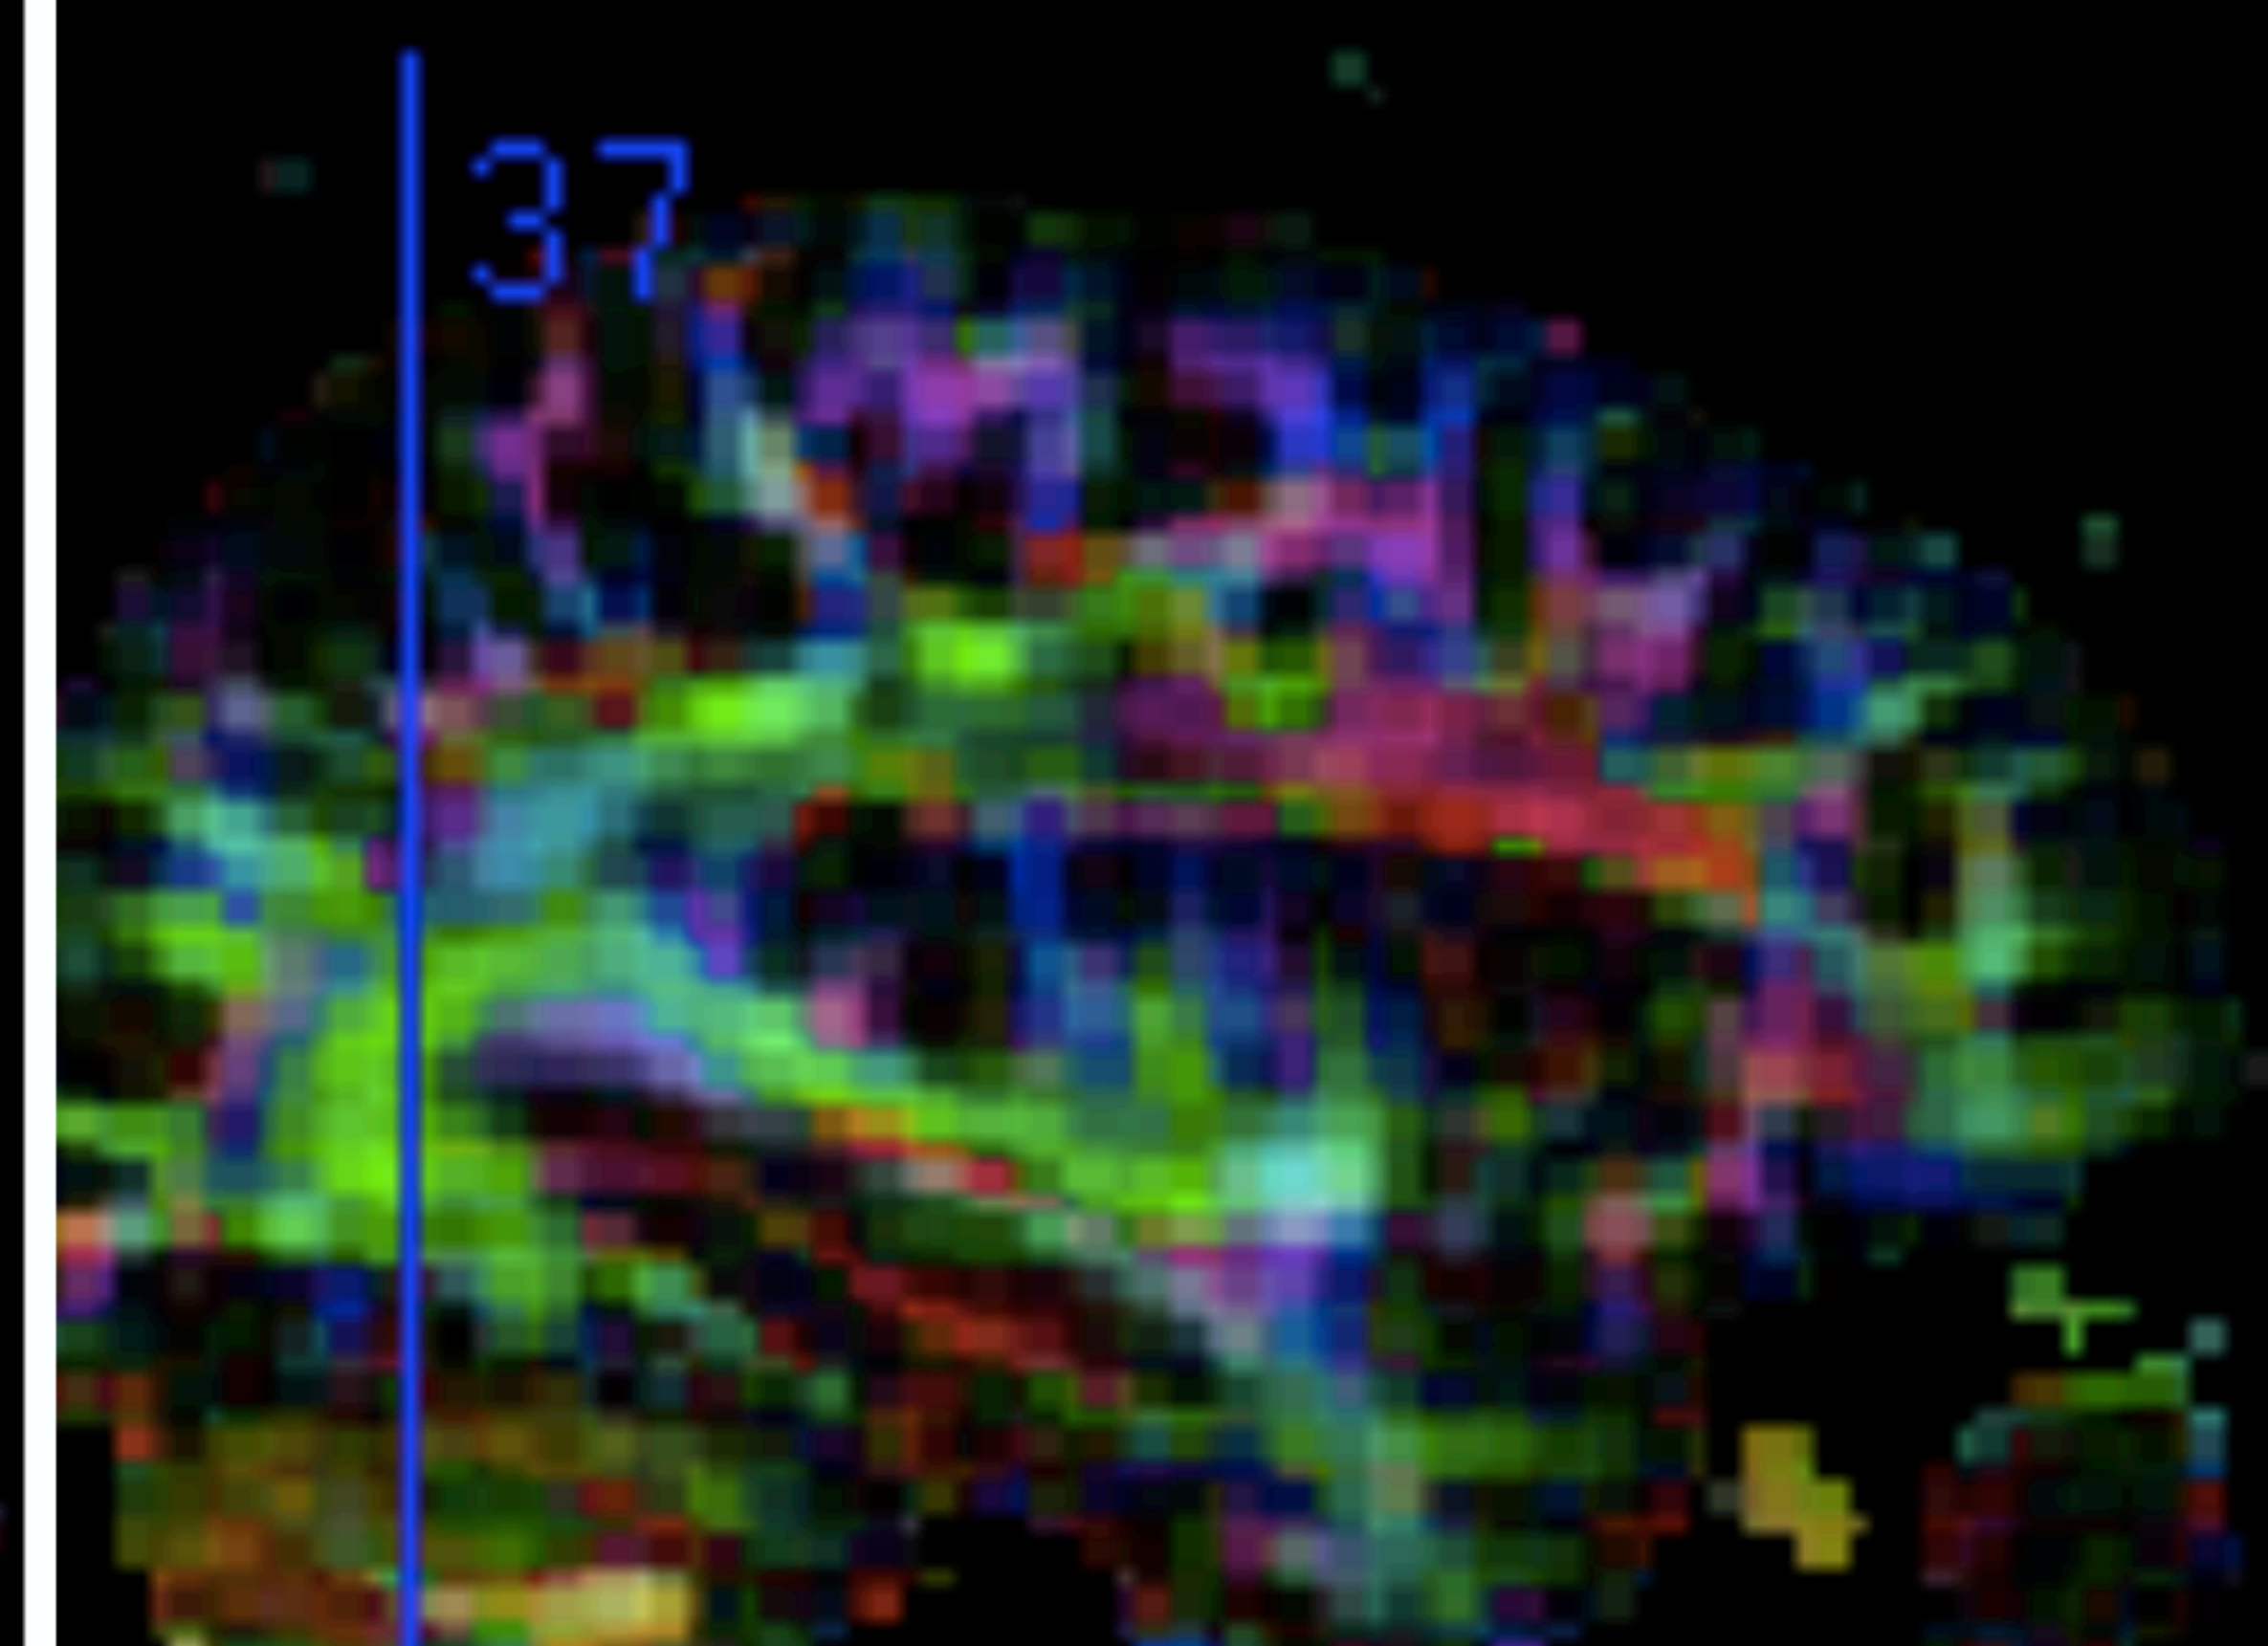

C.

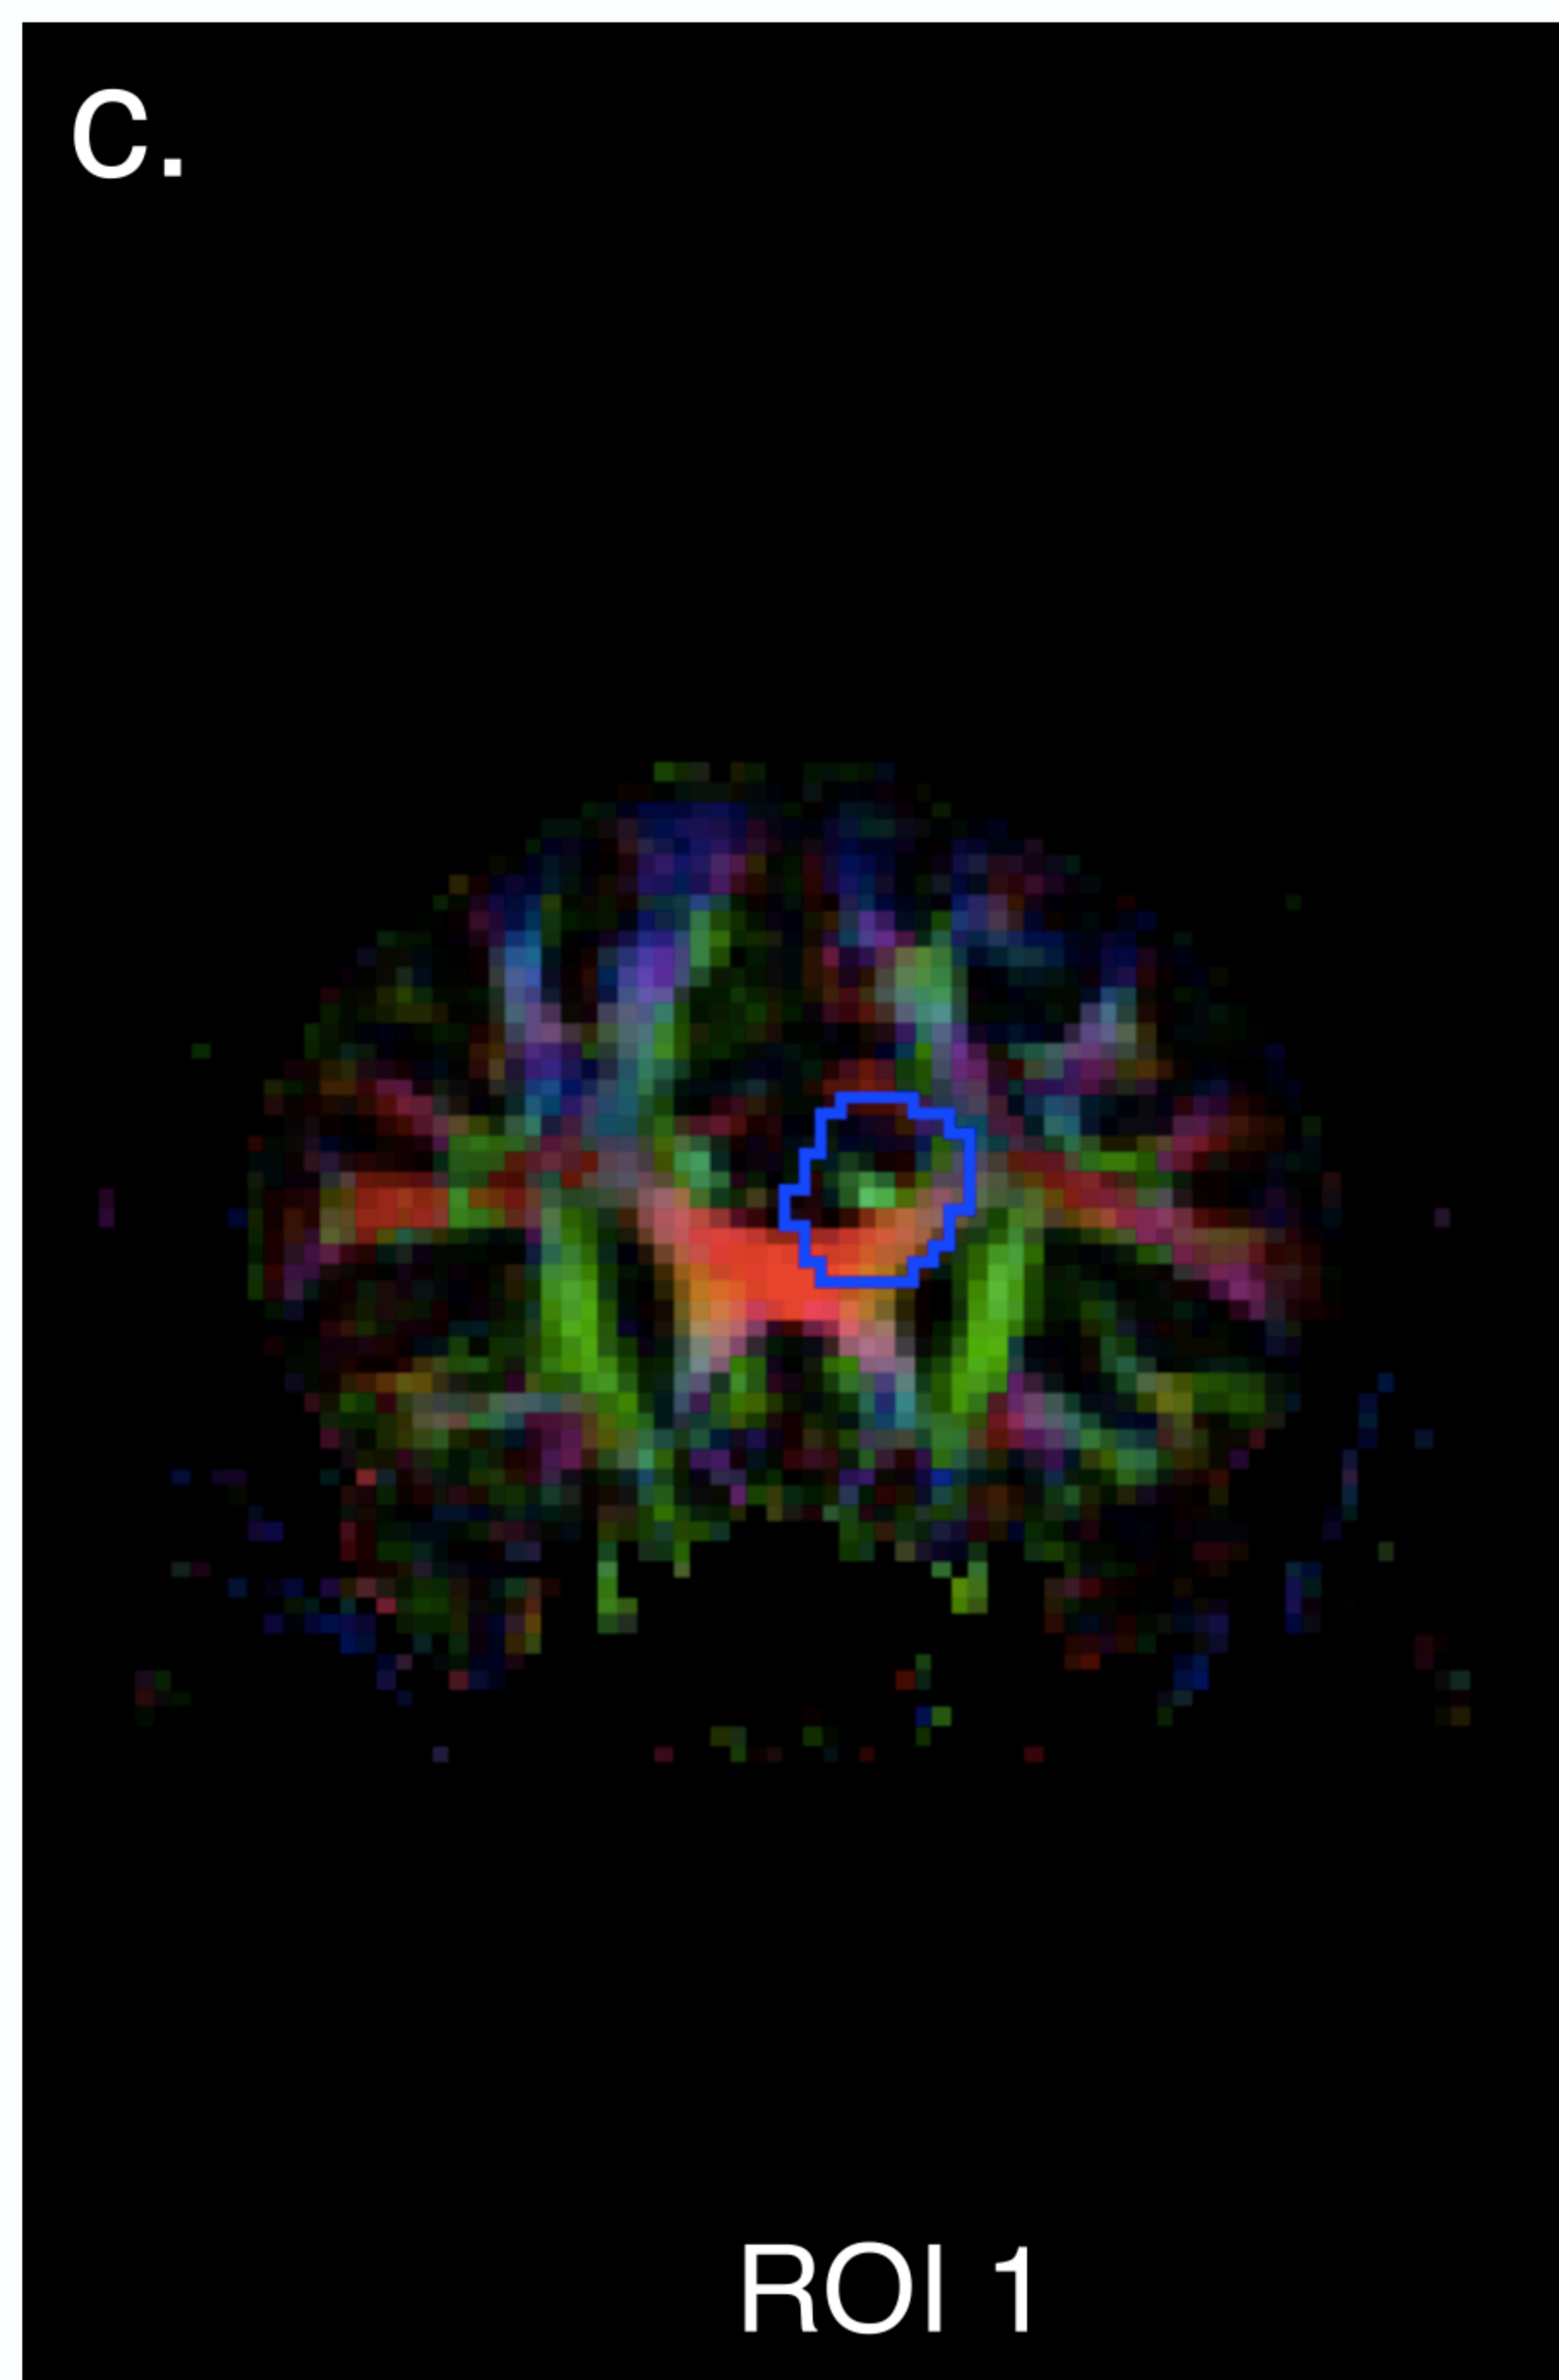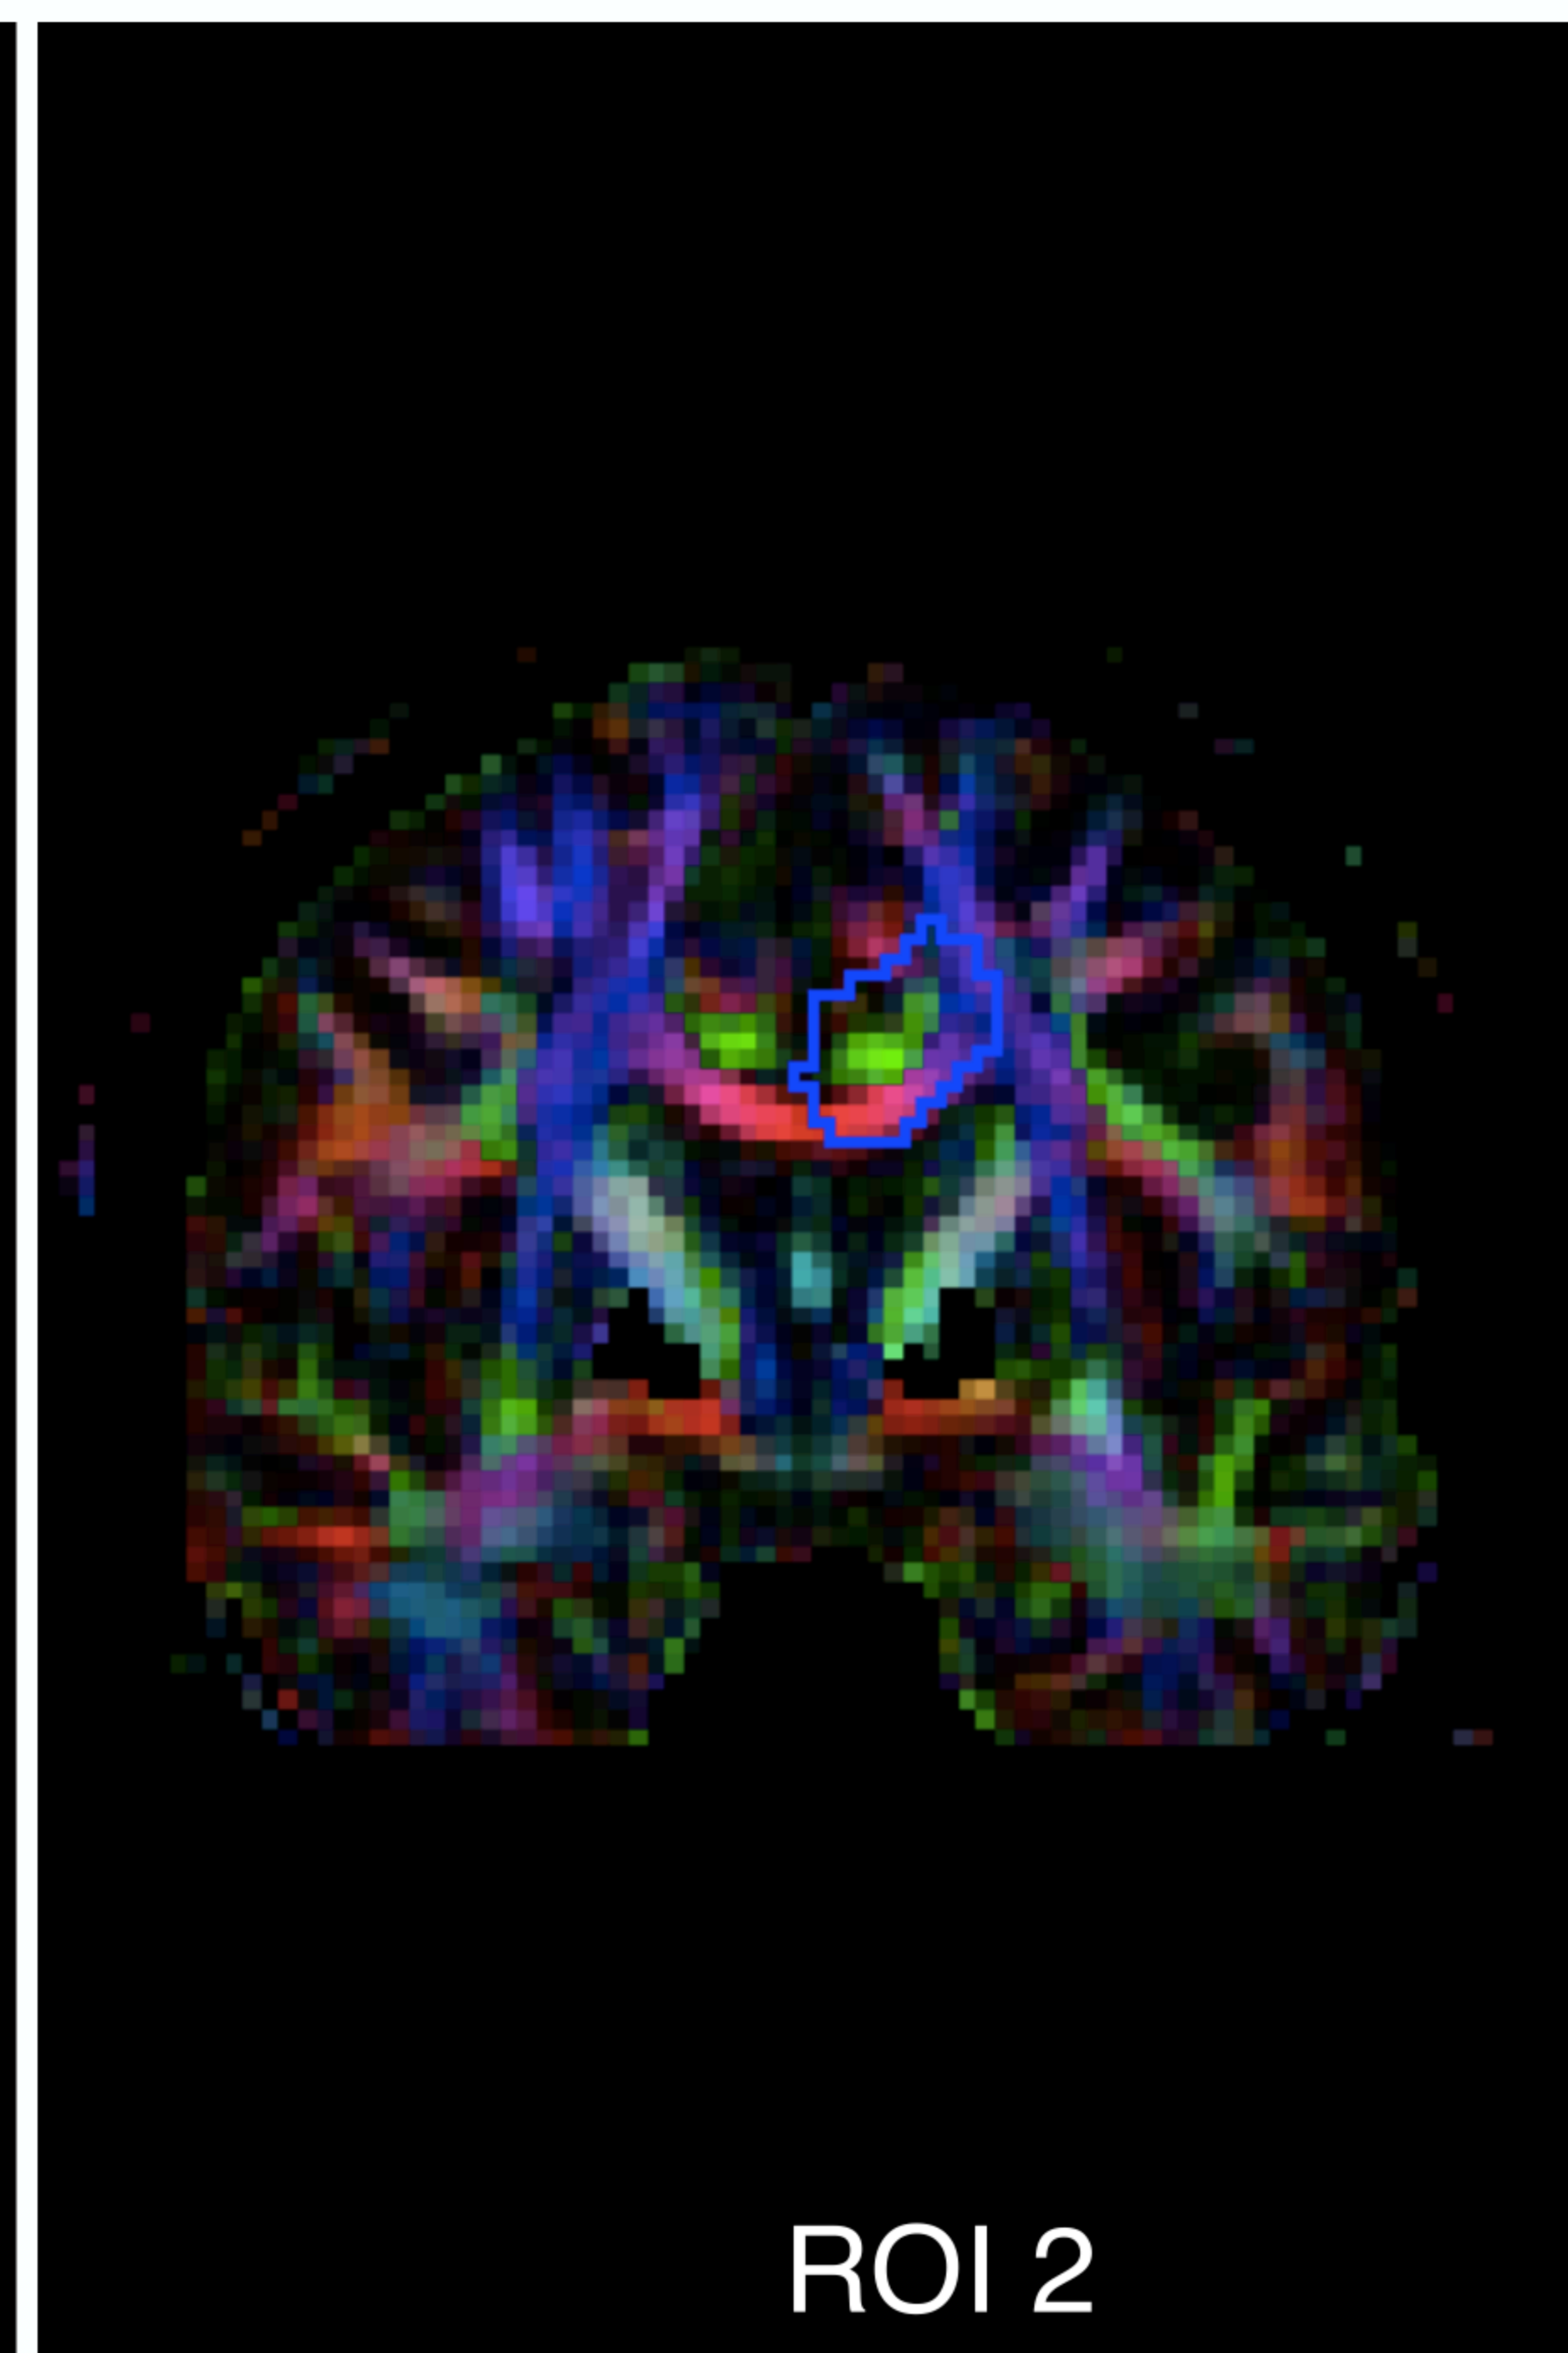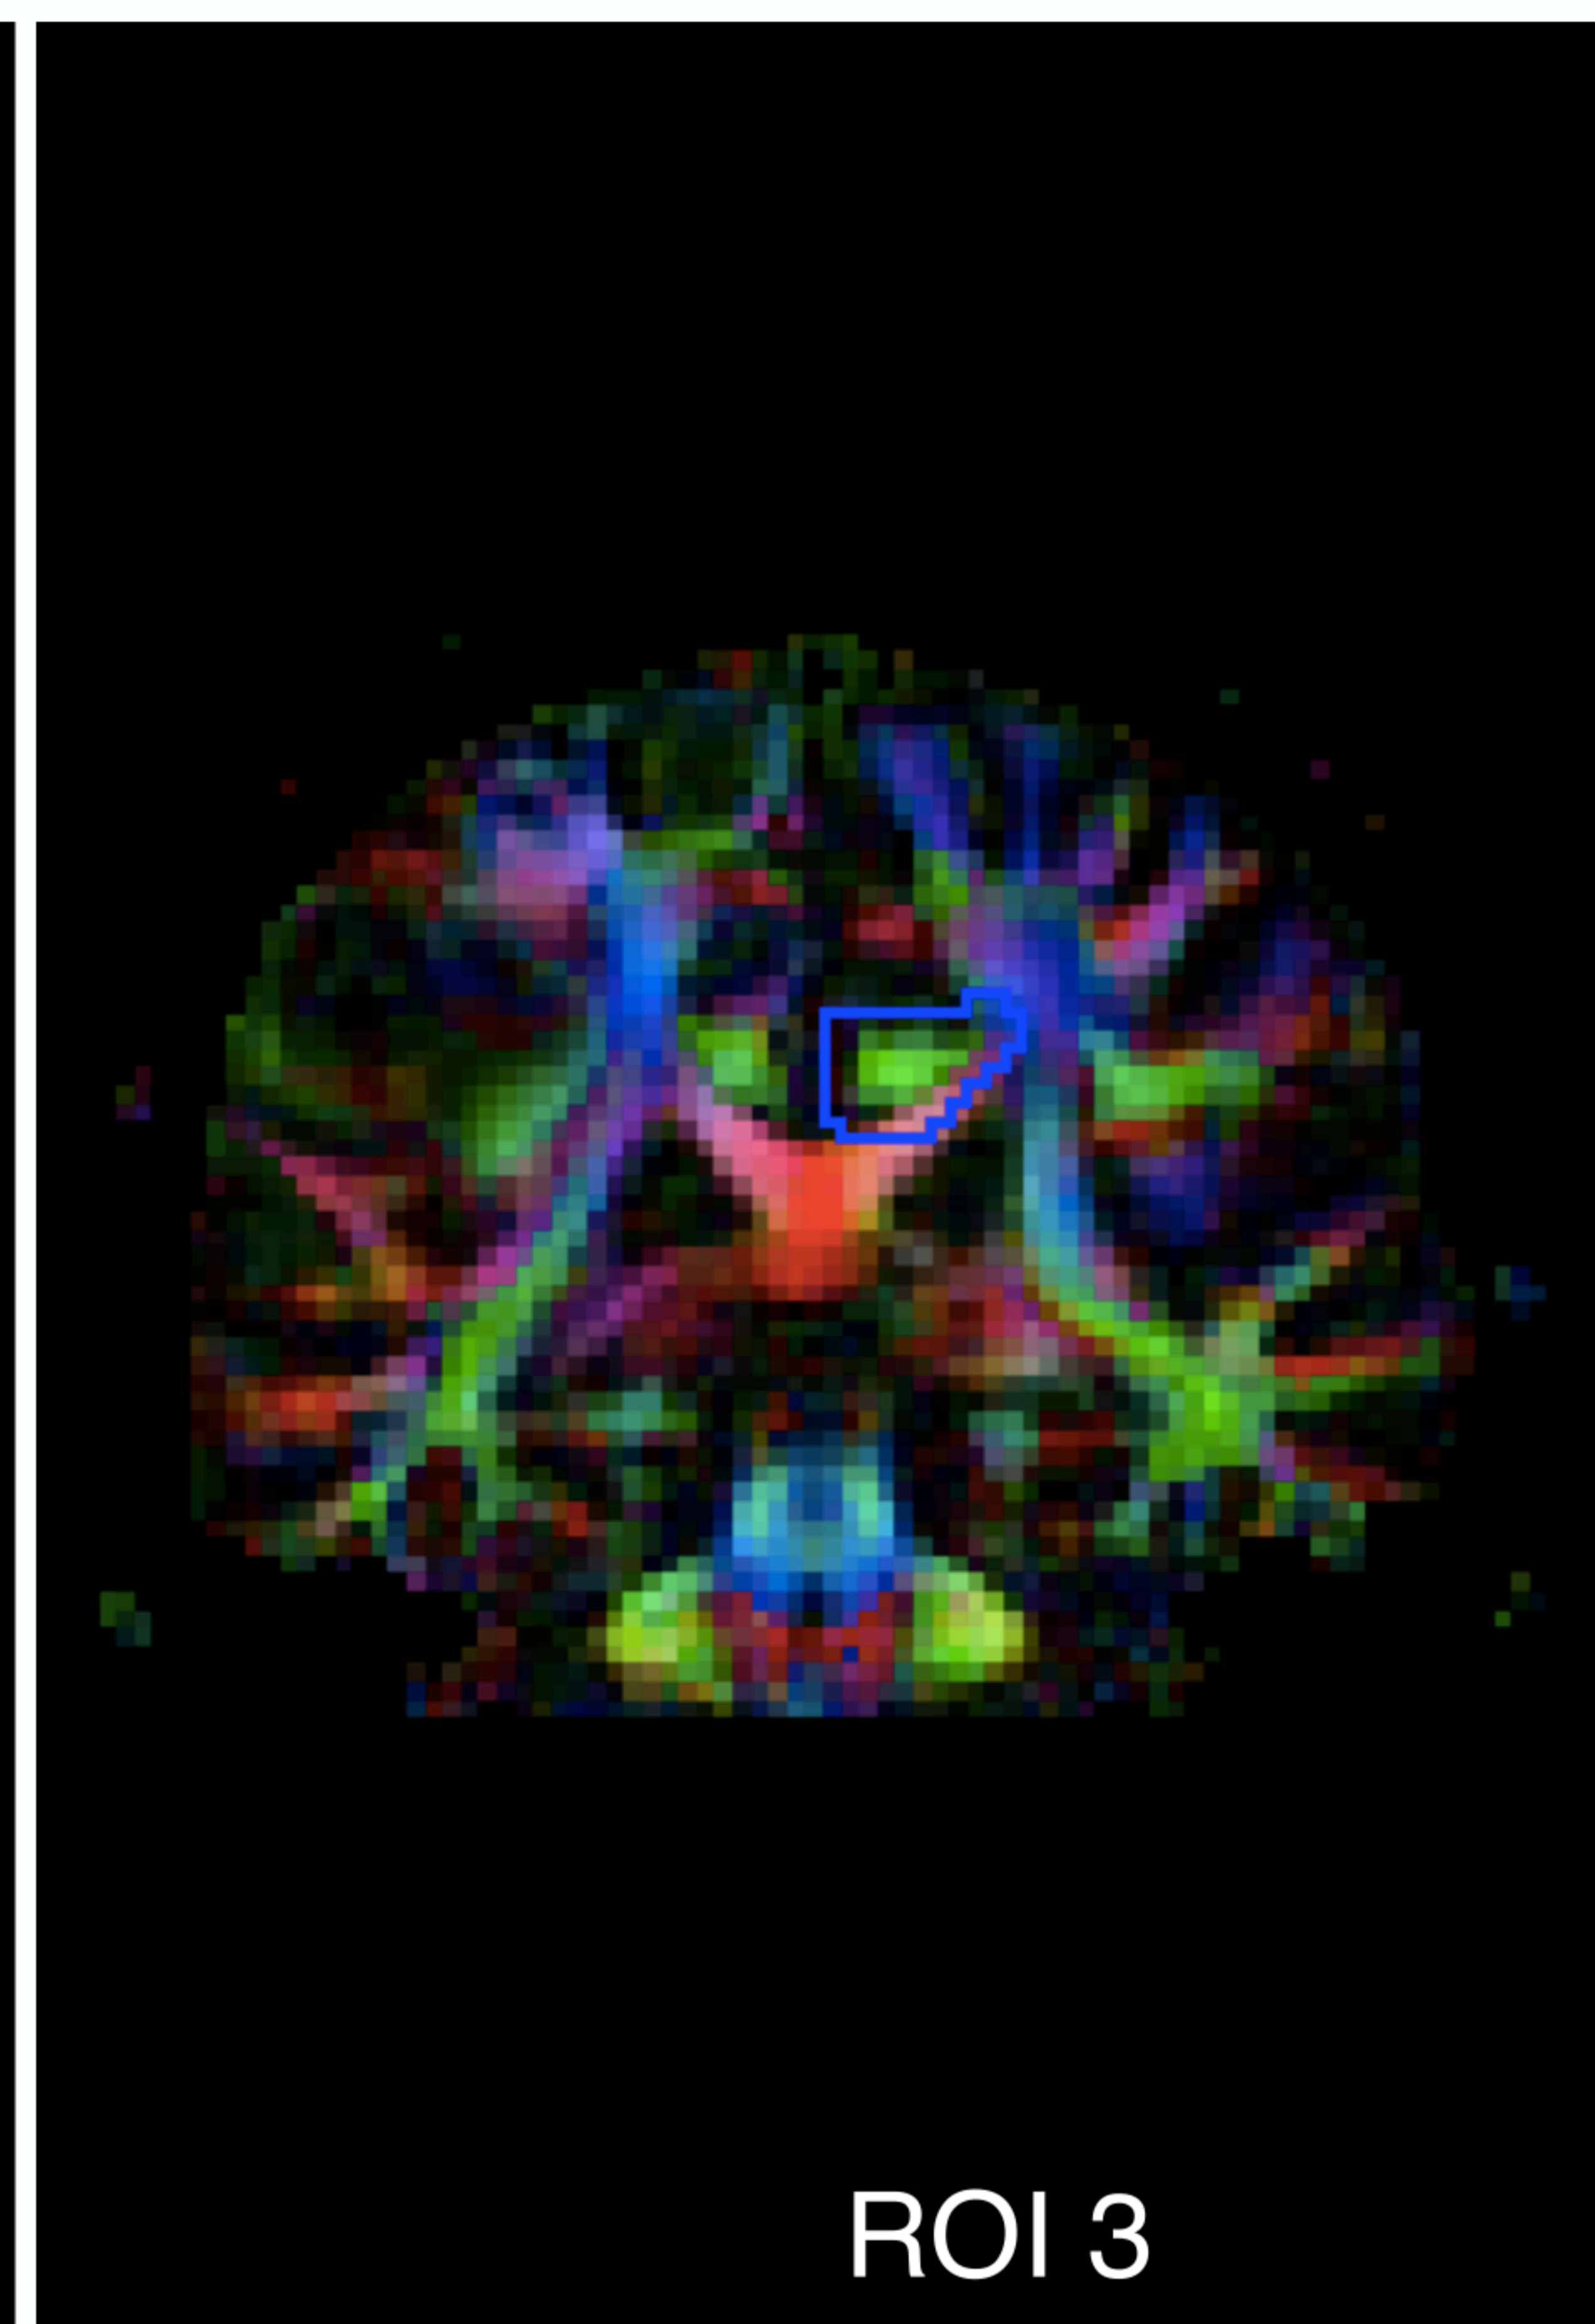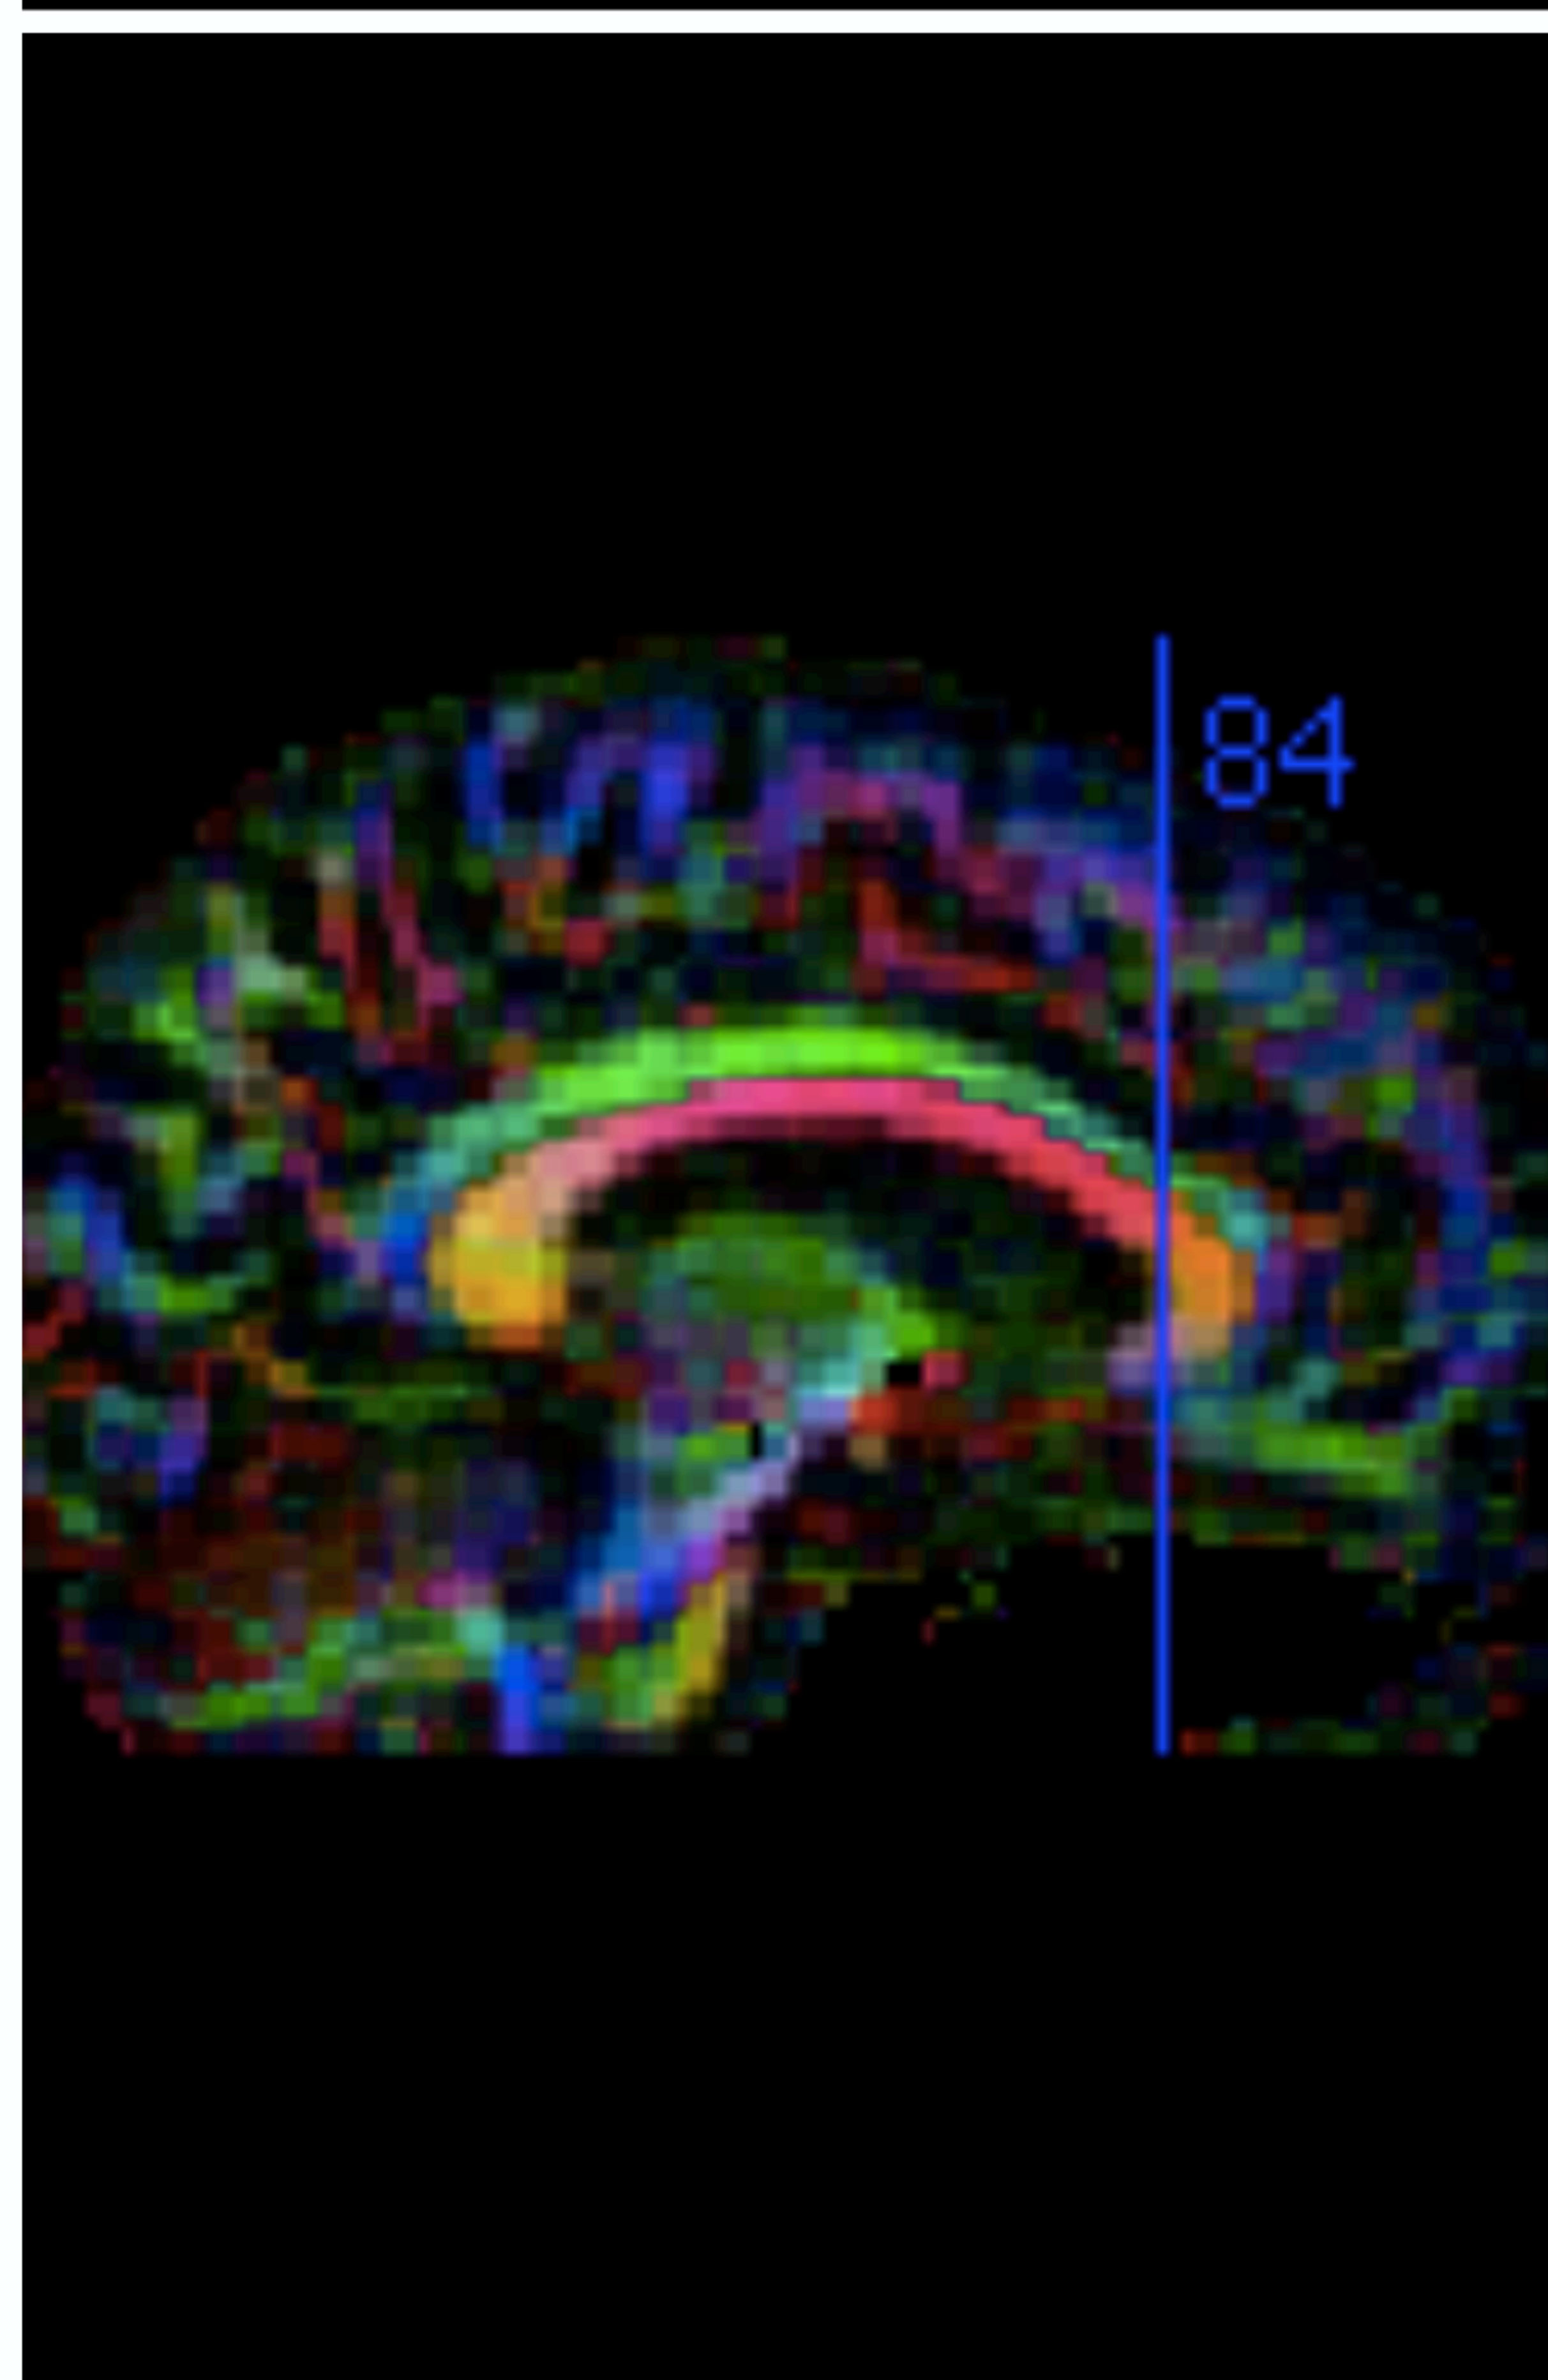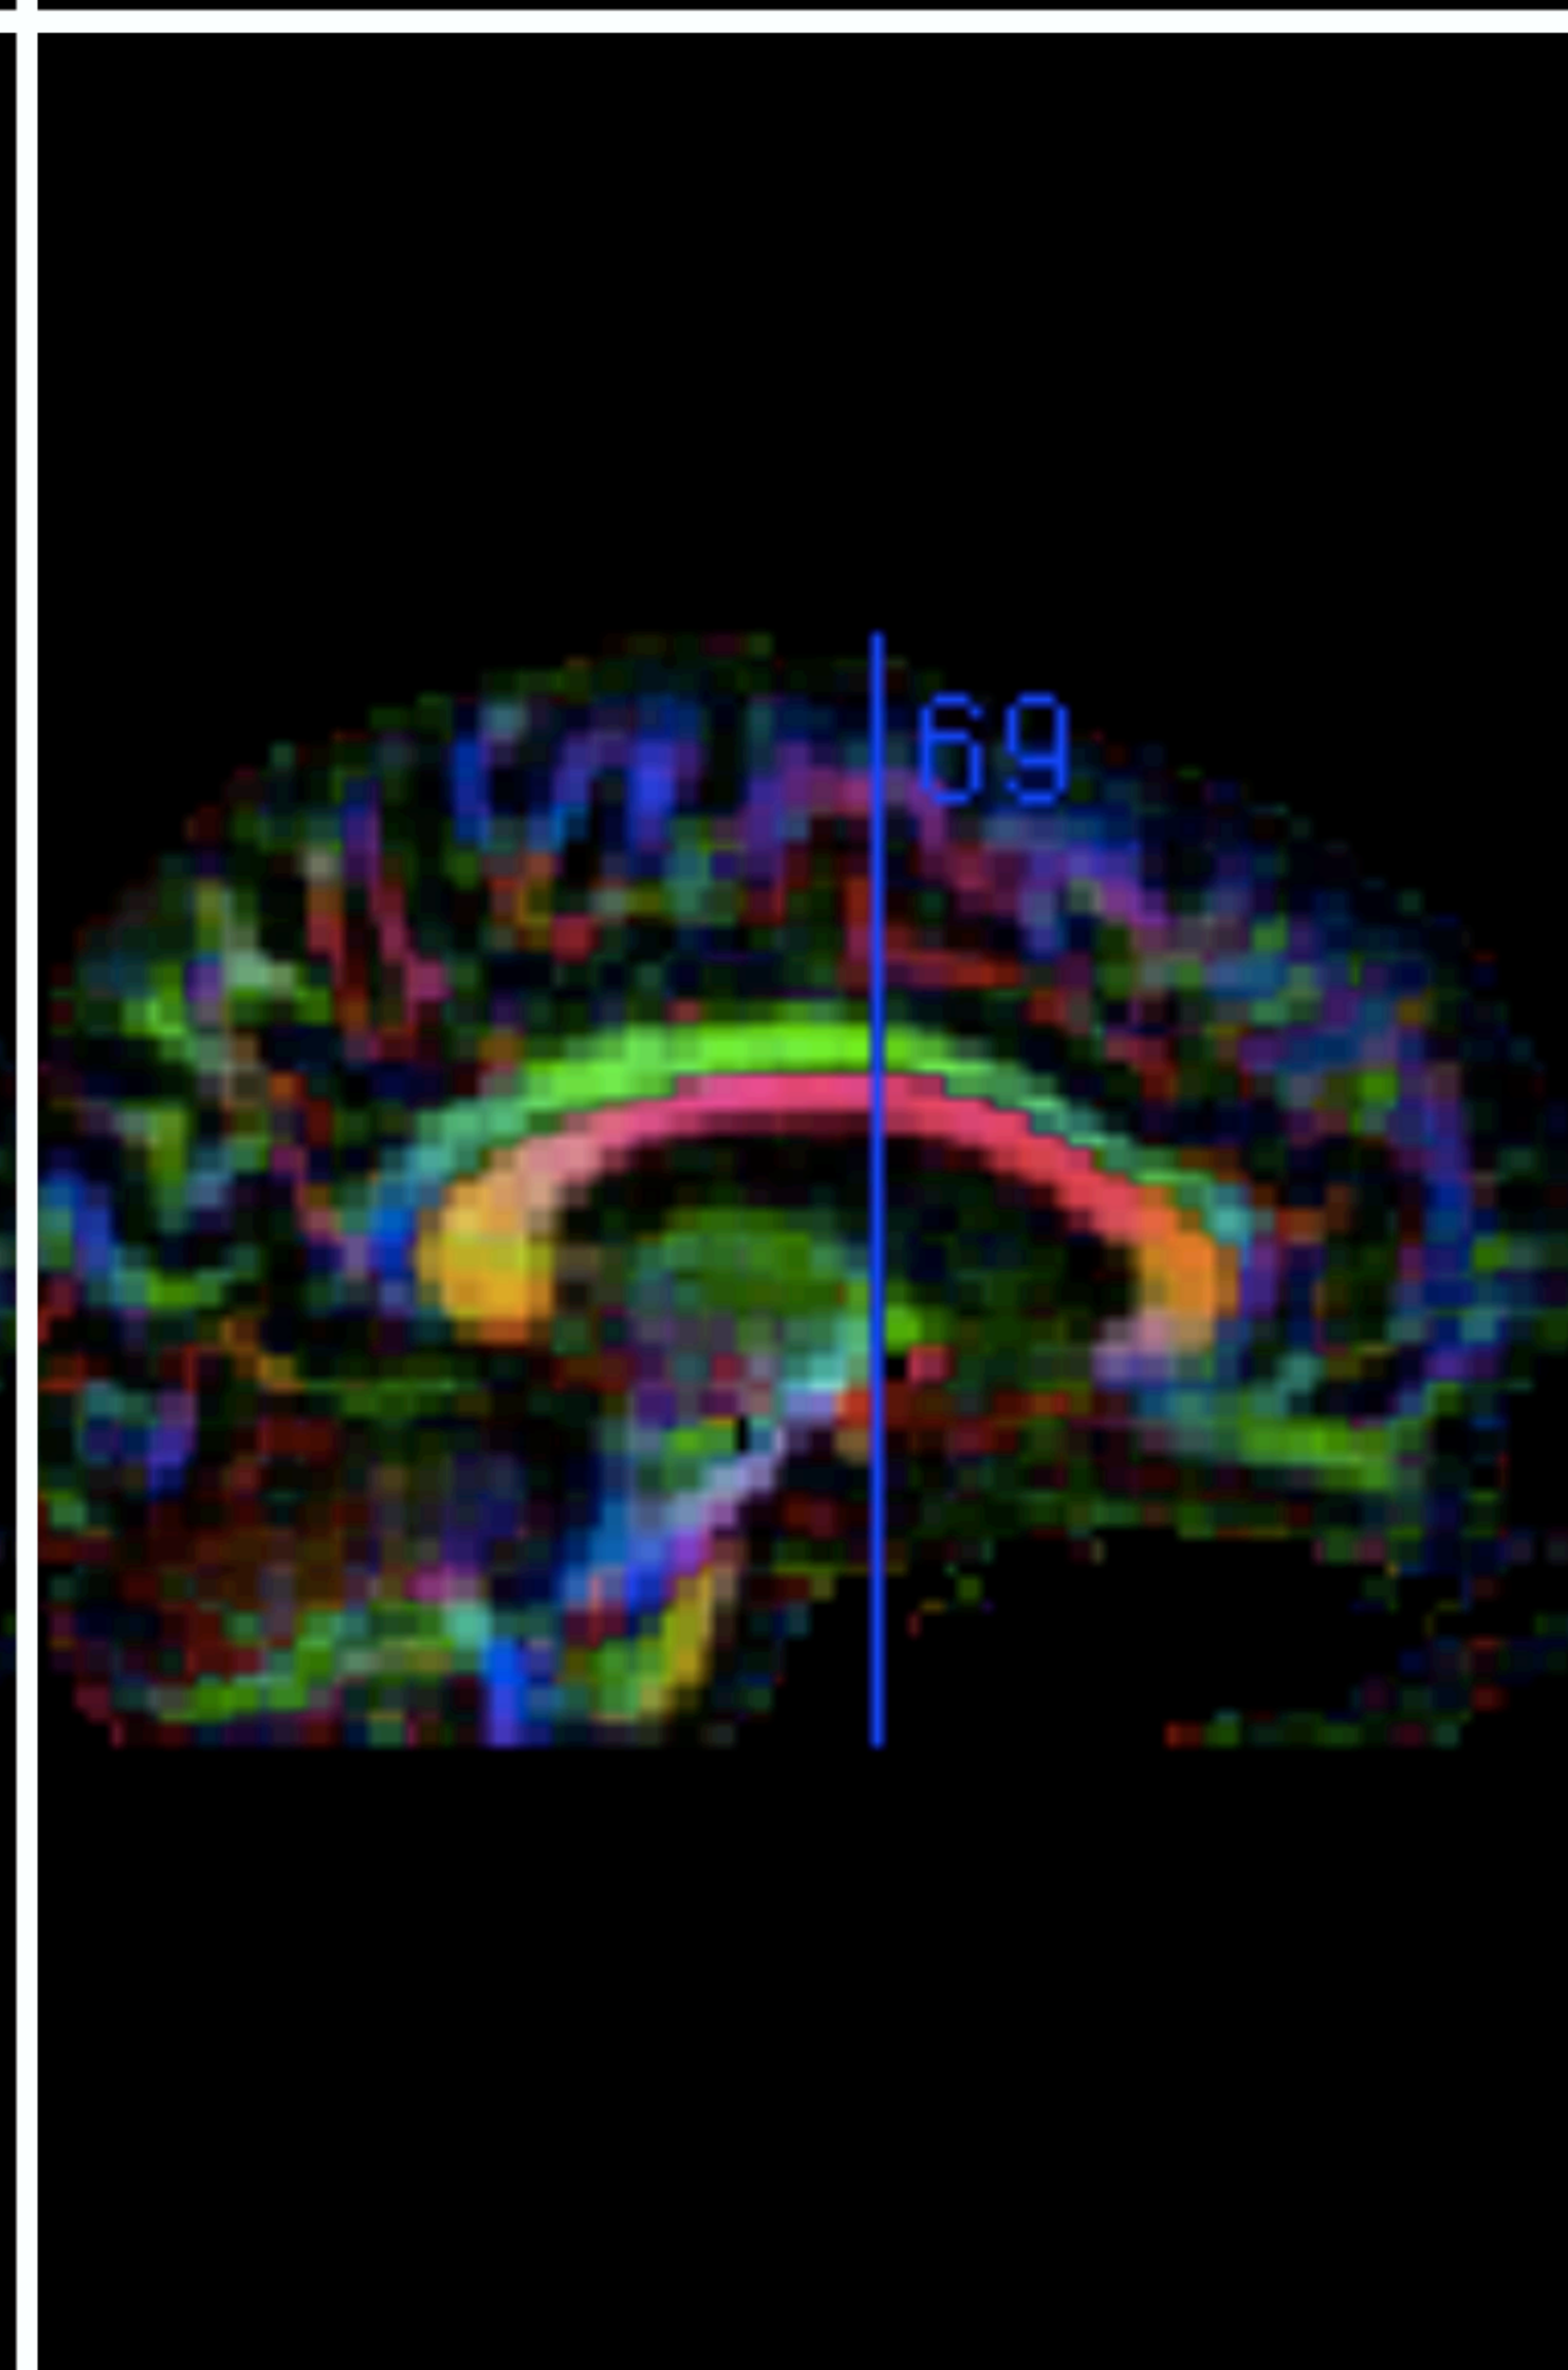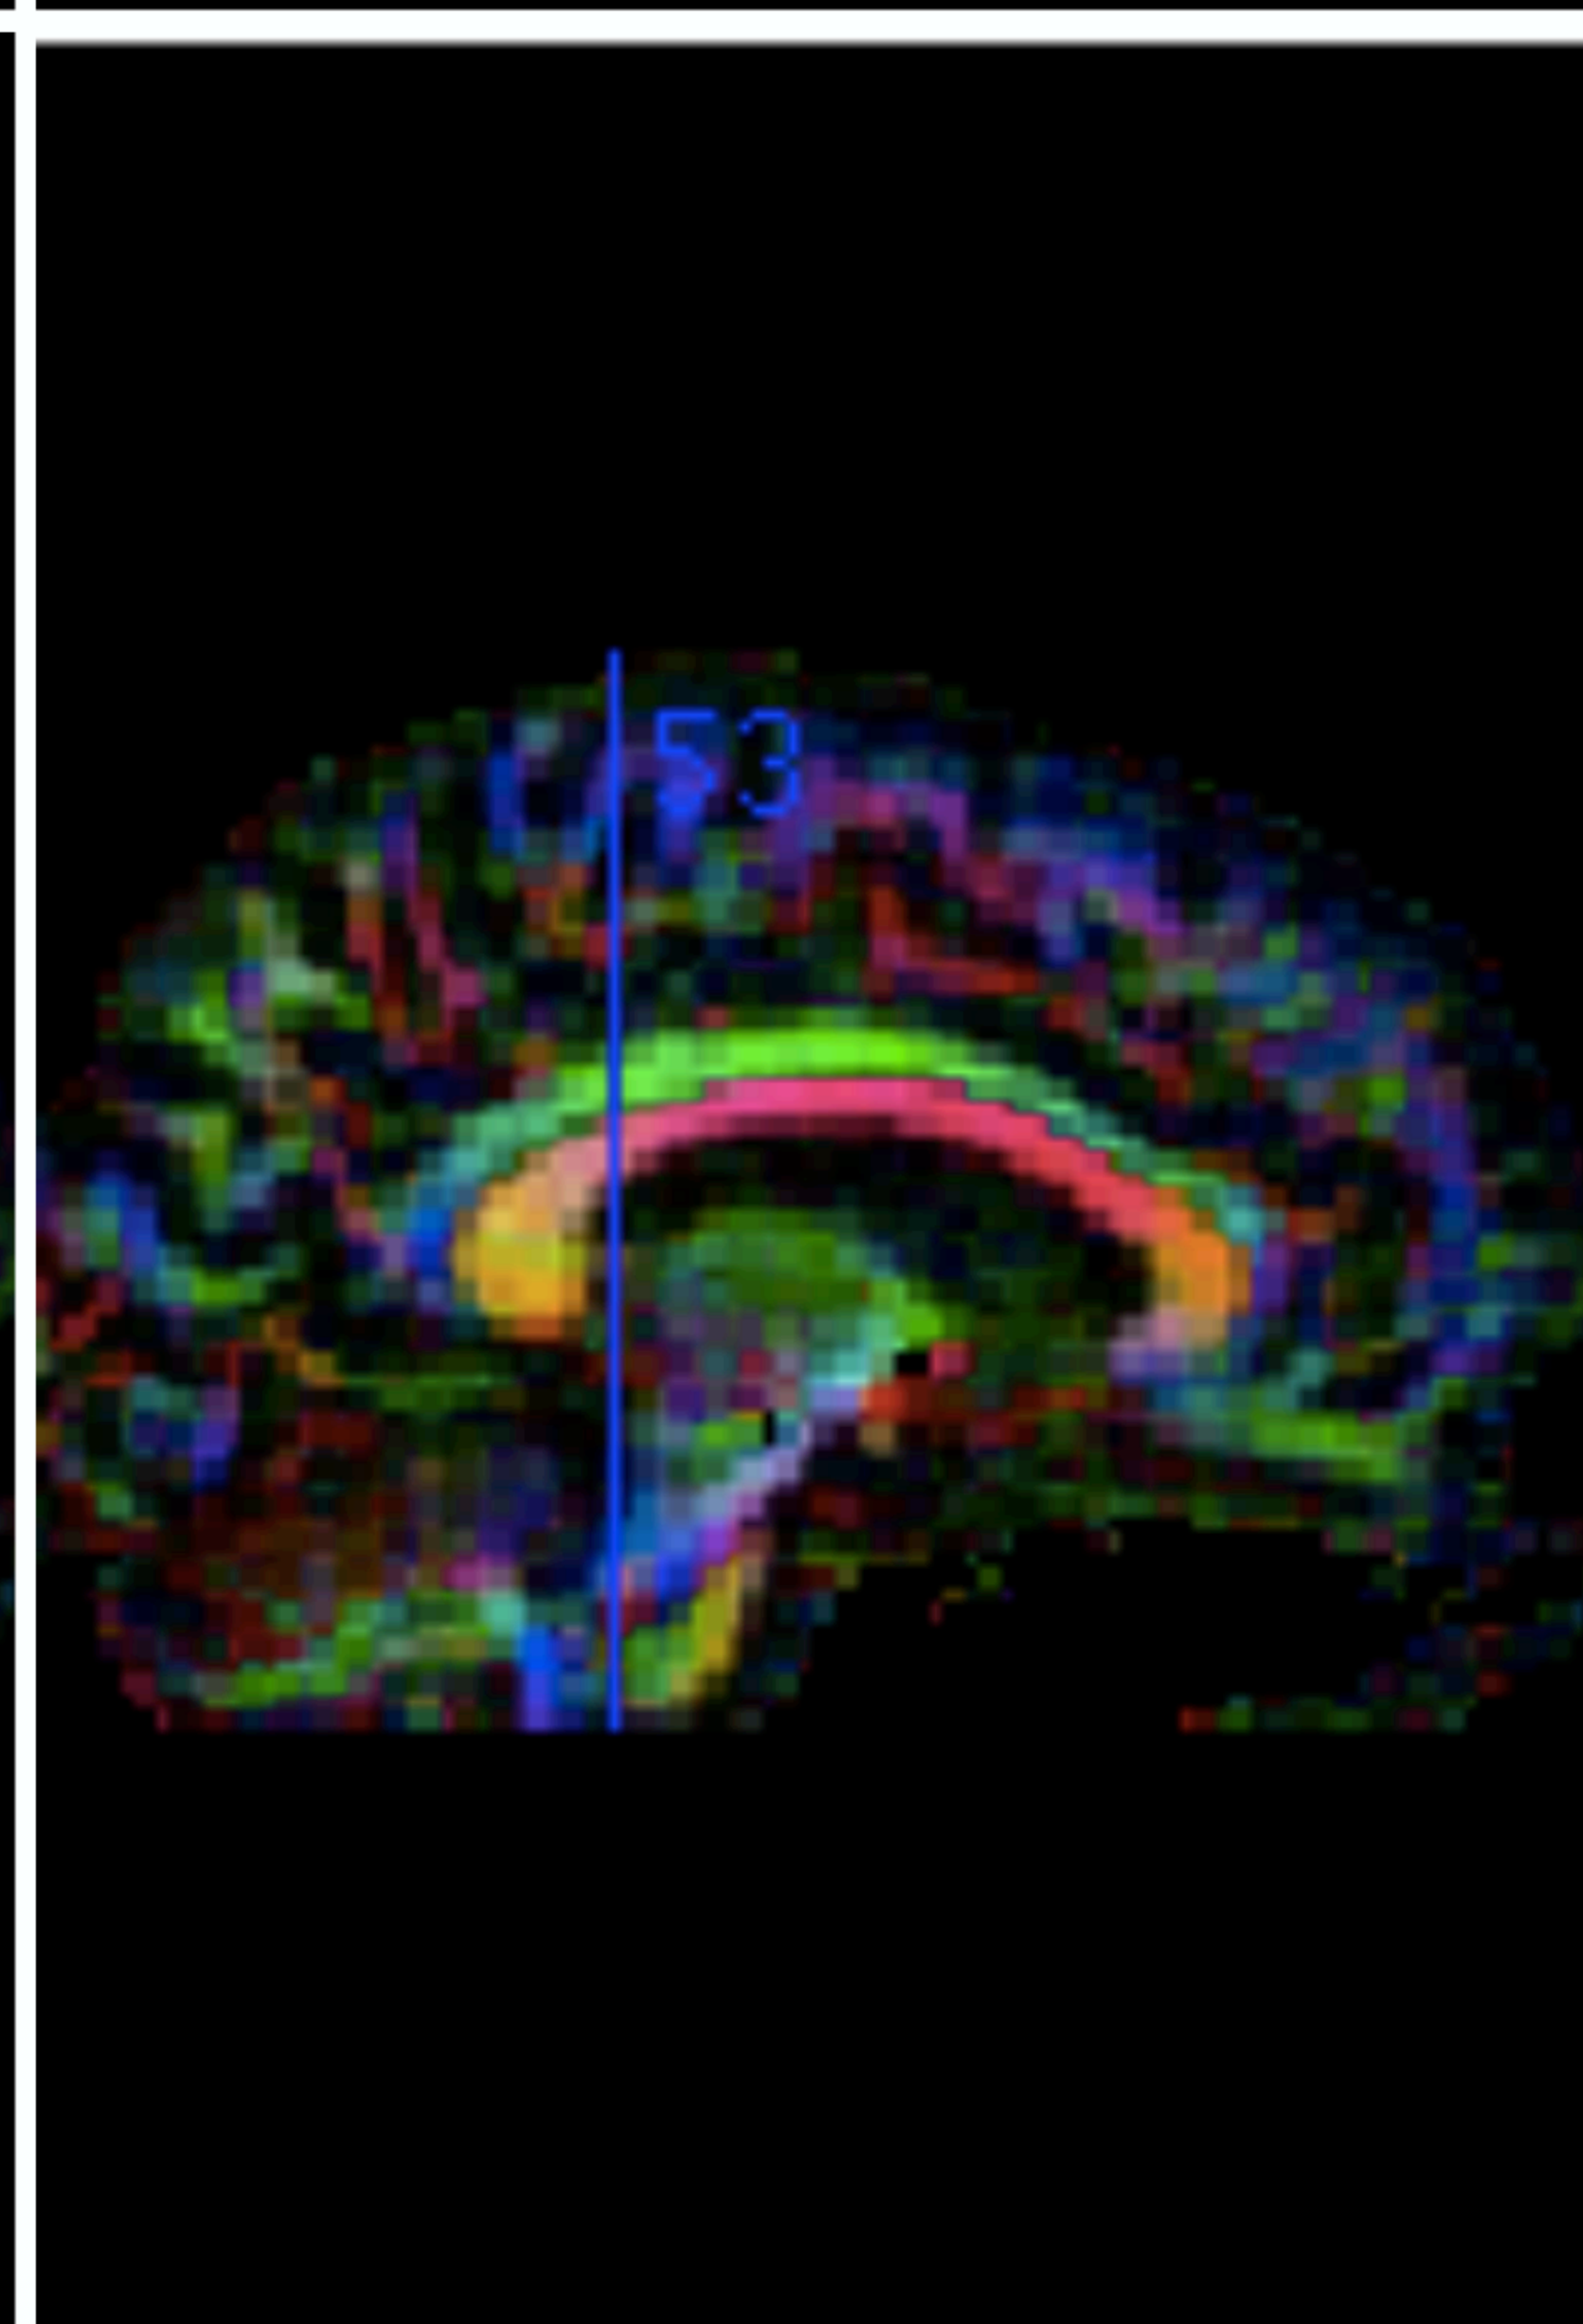

d.

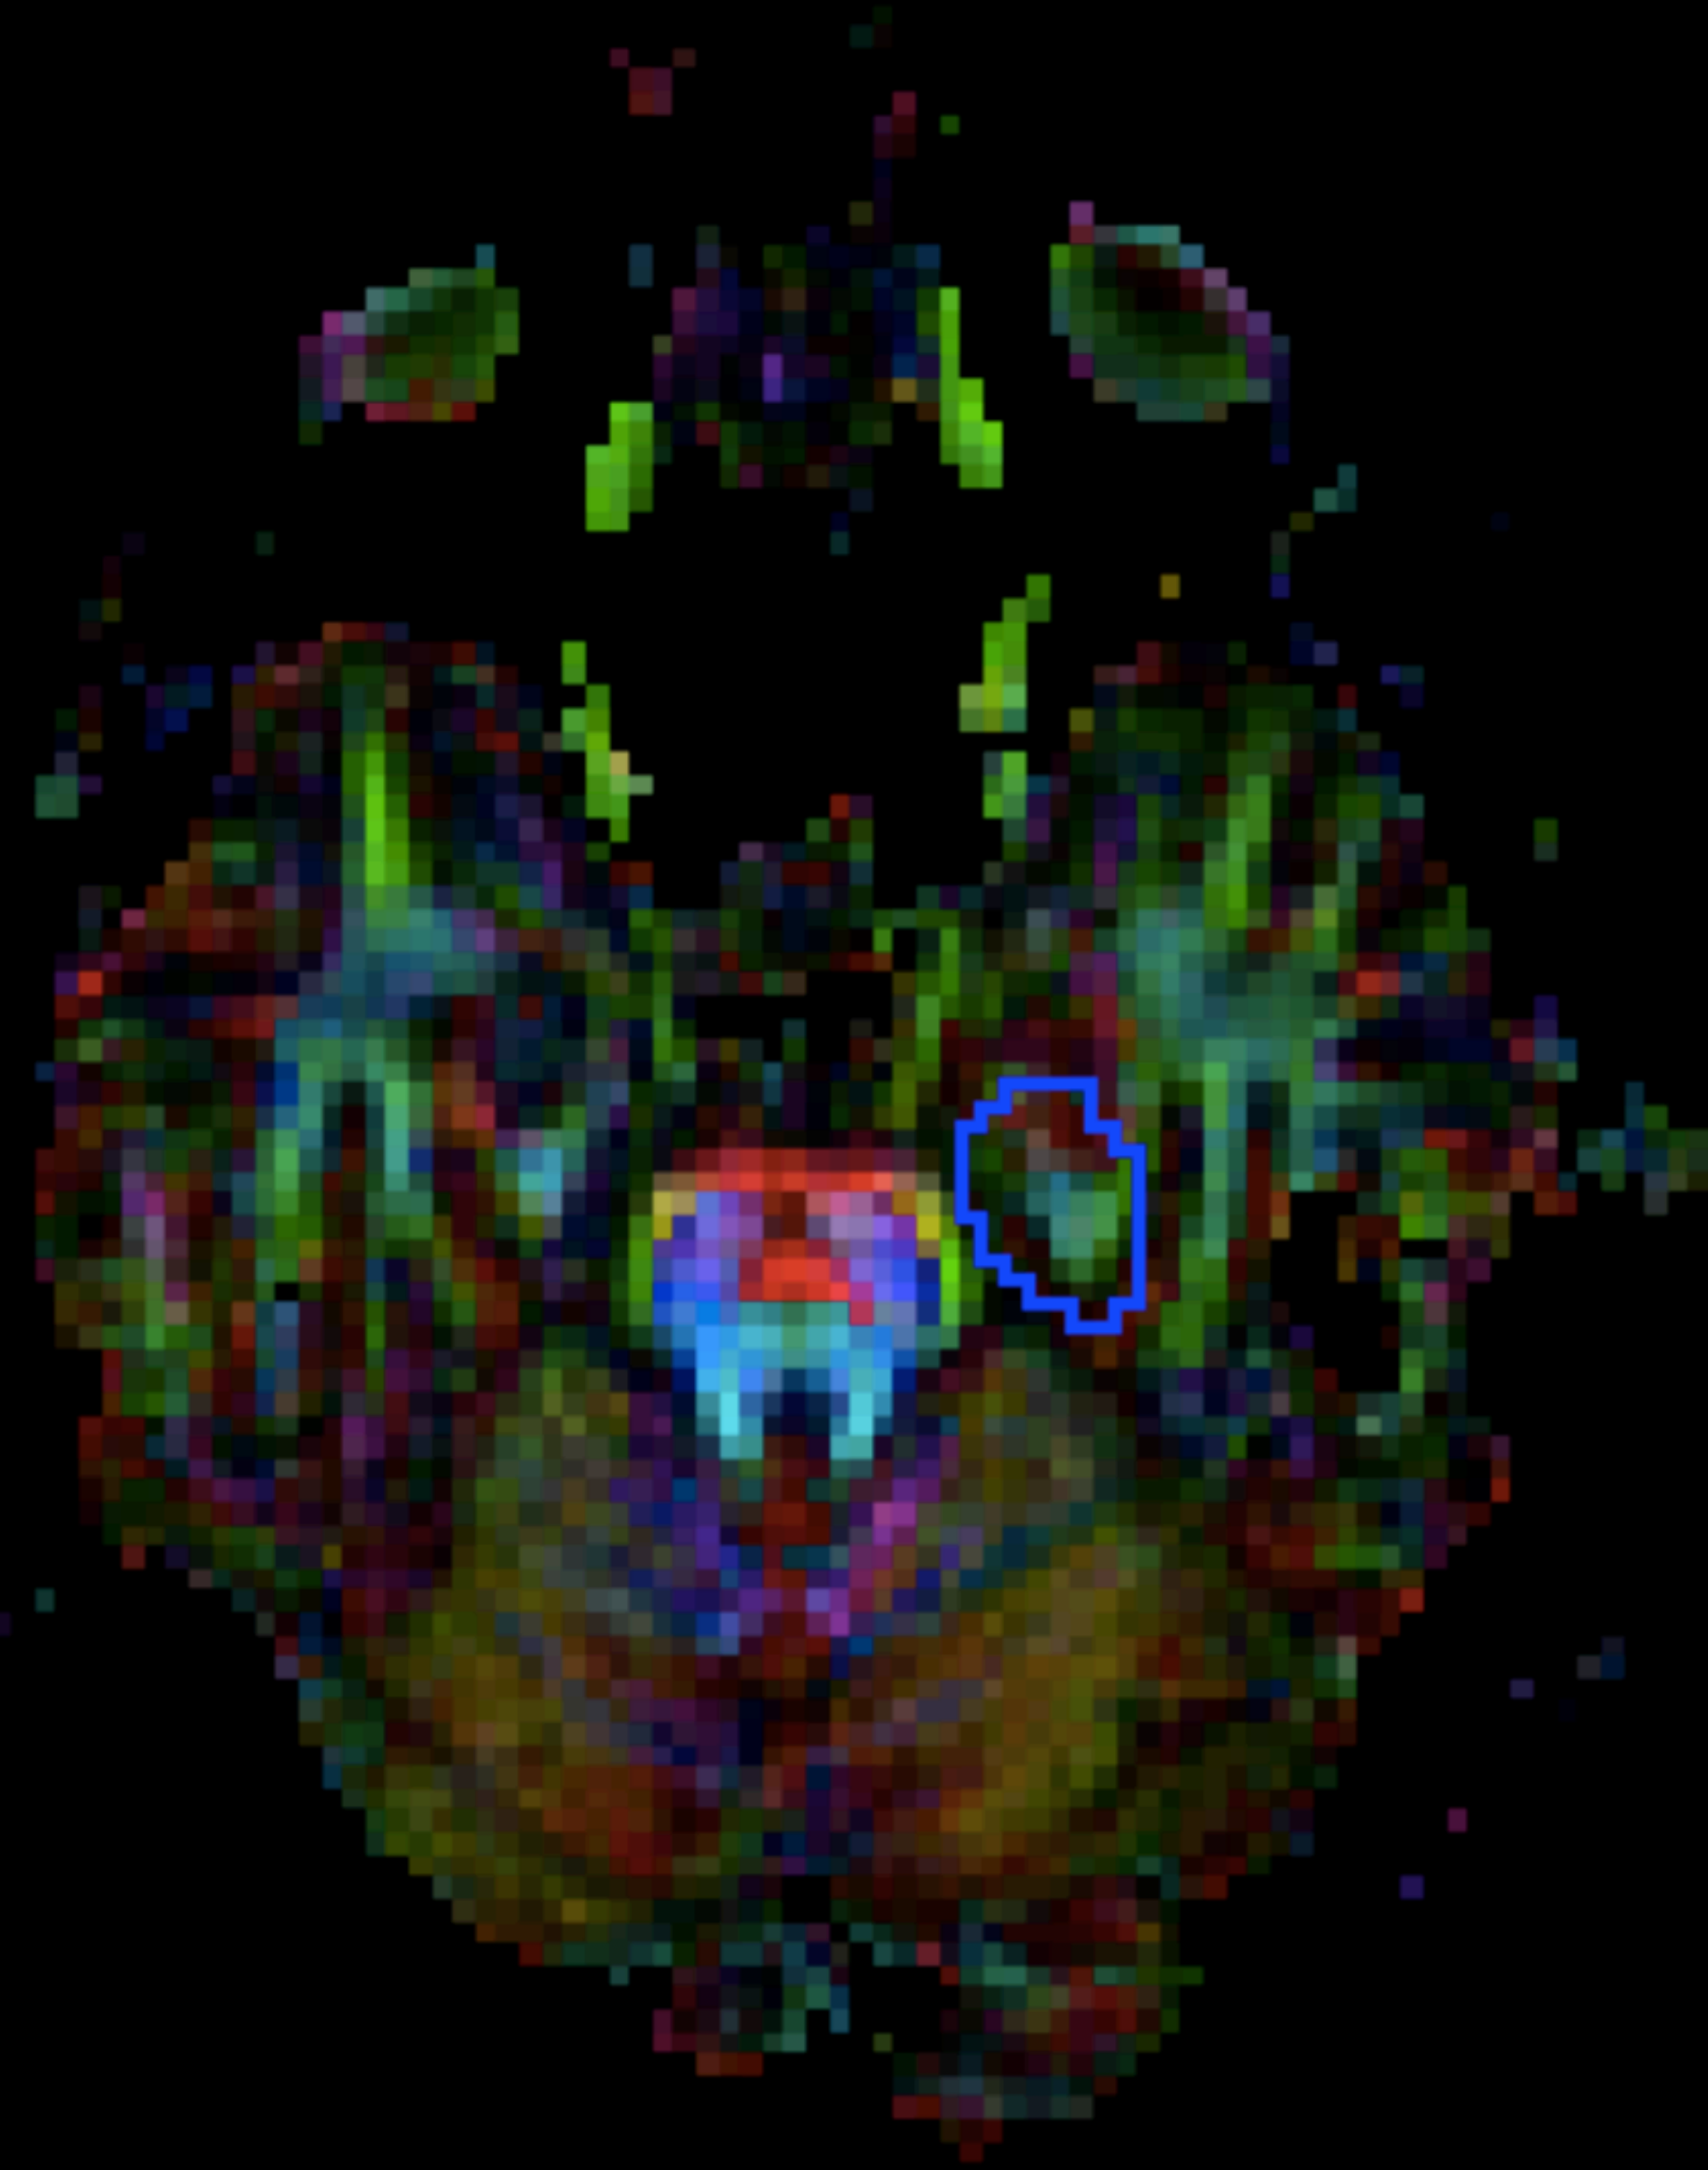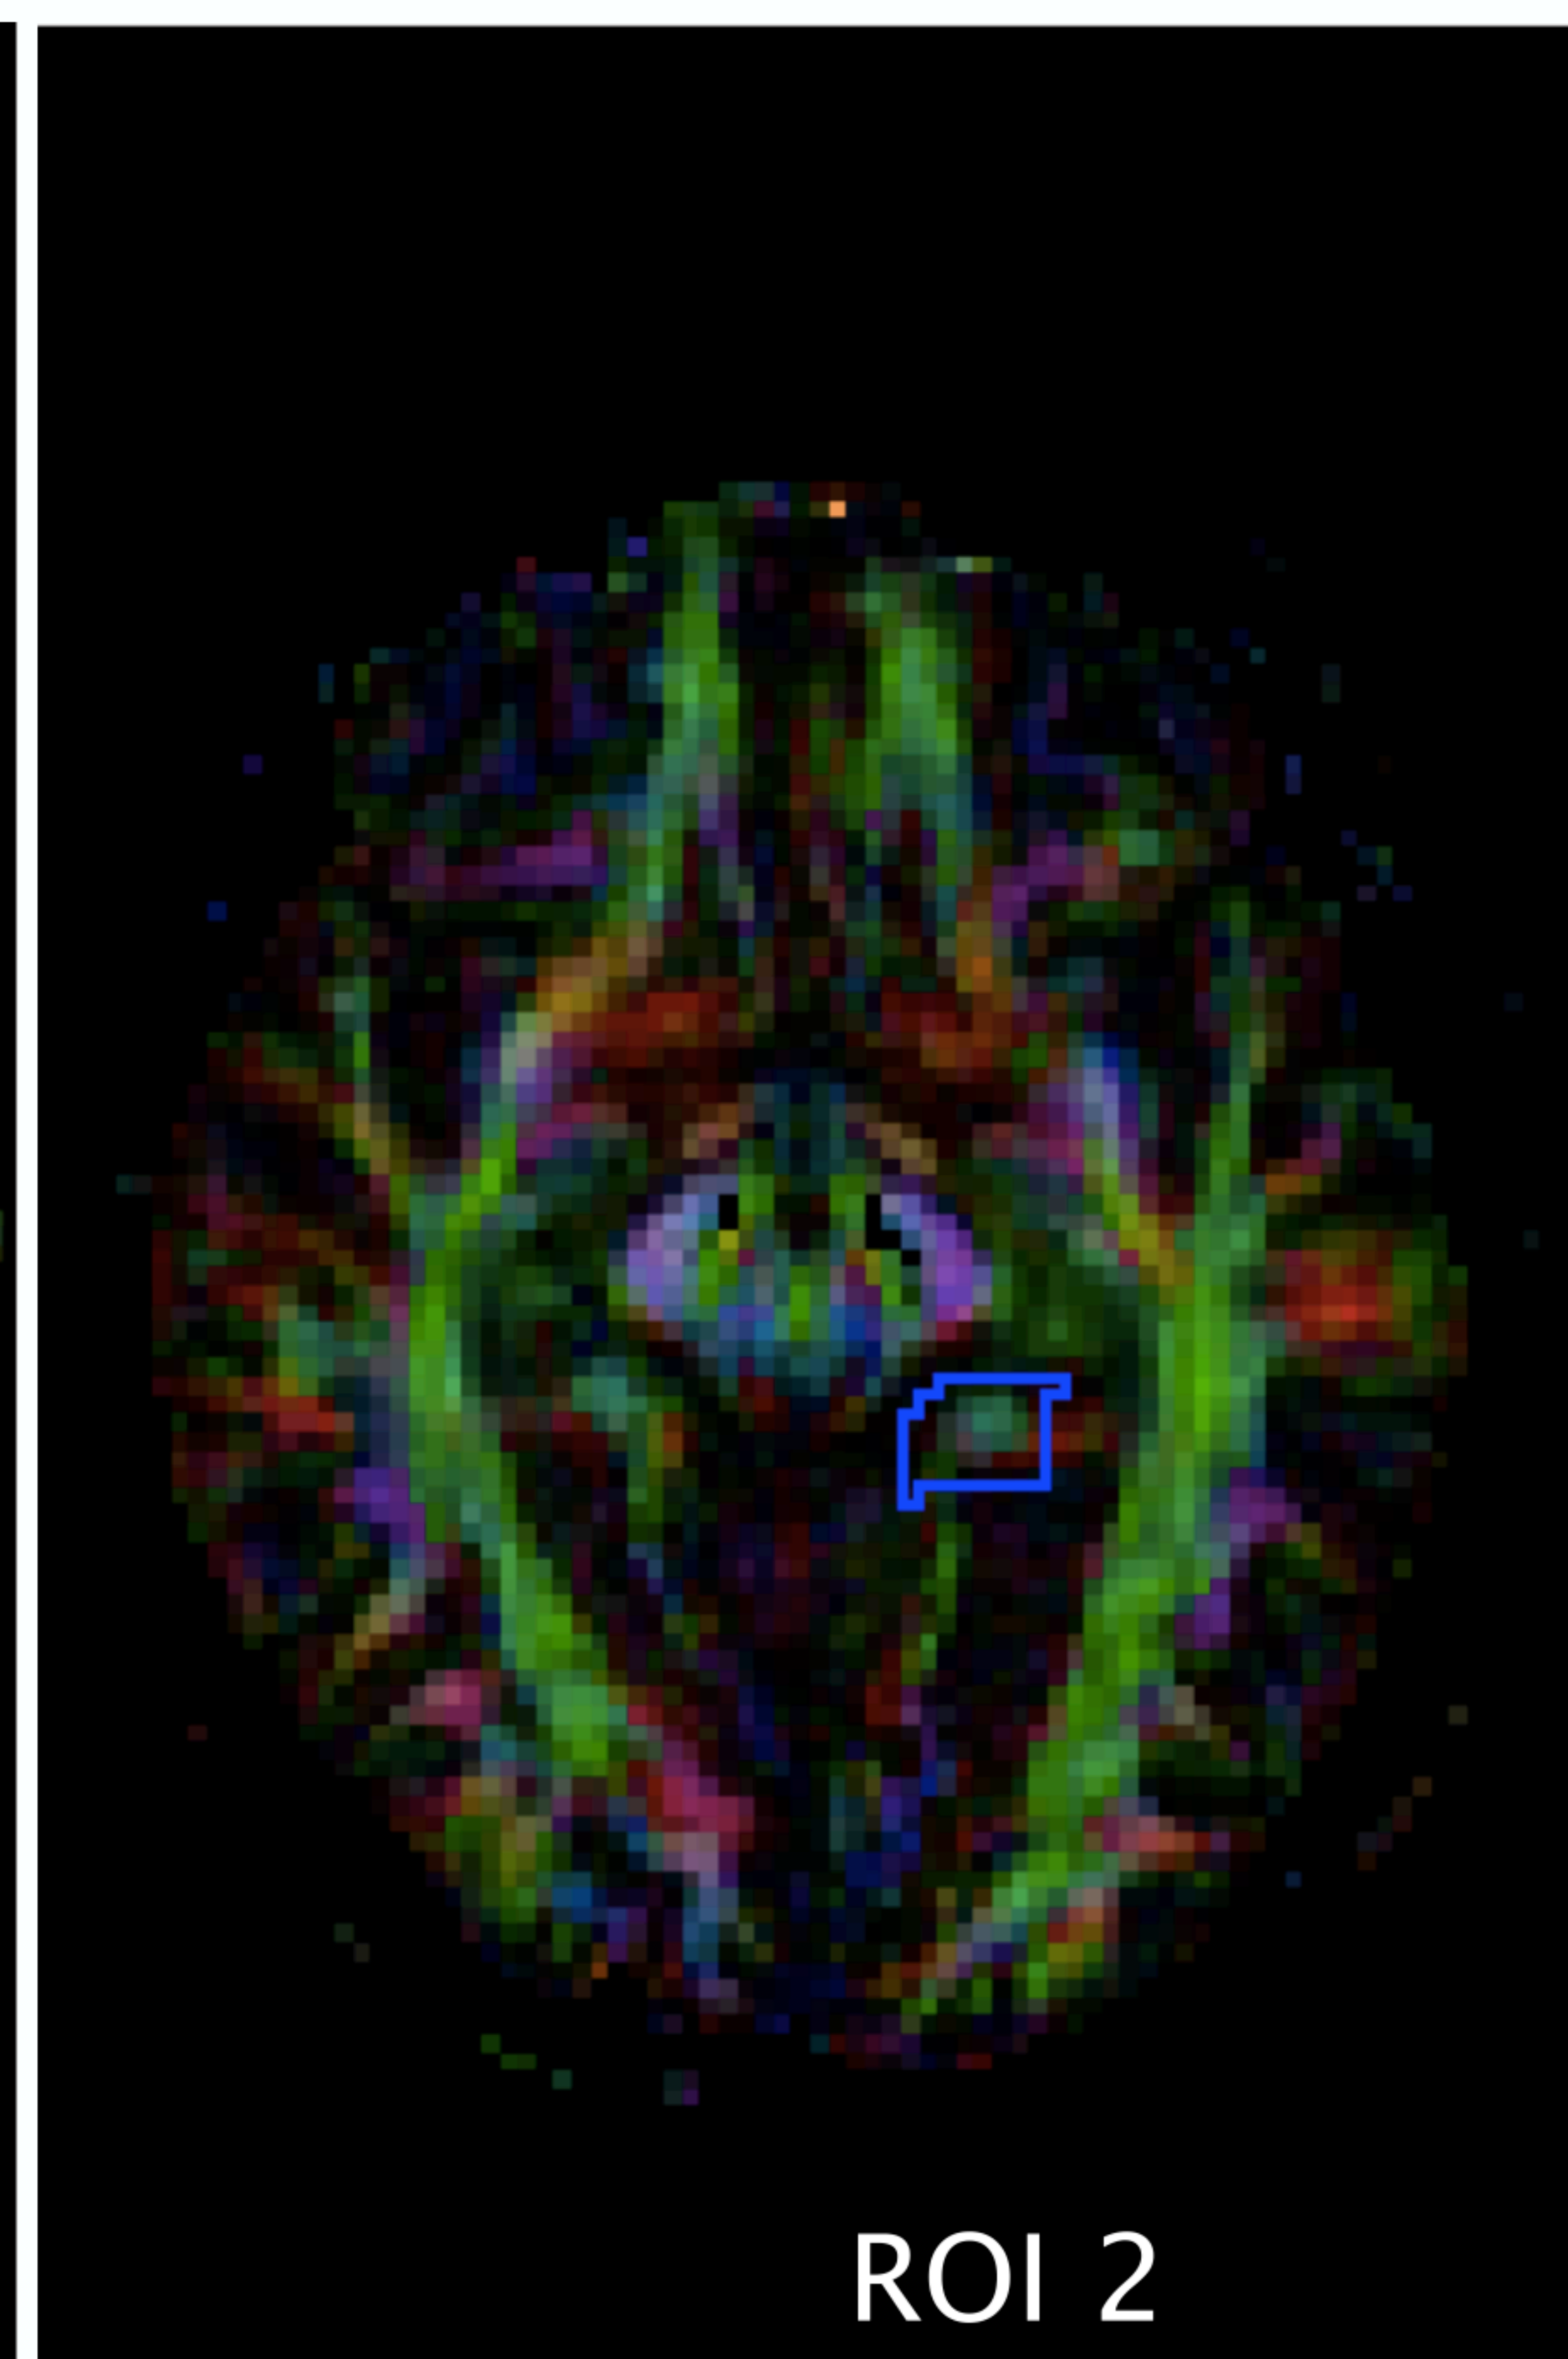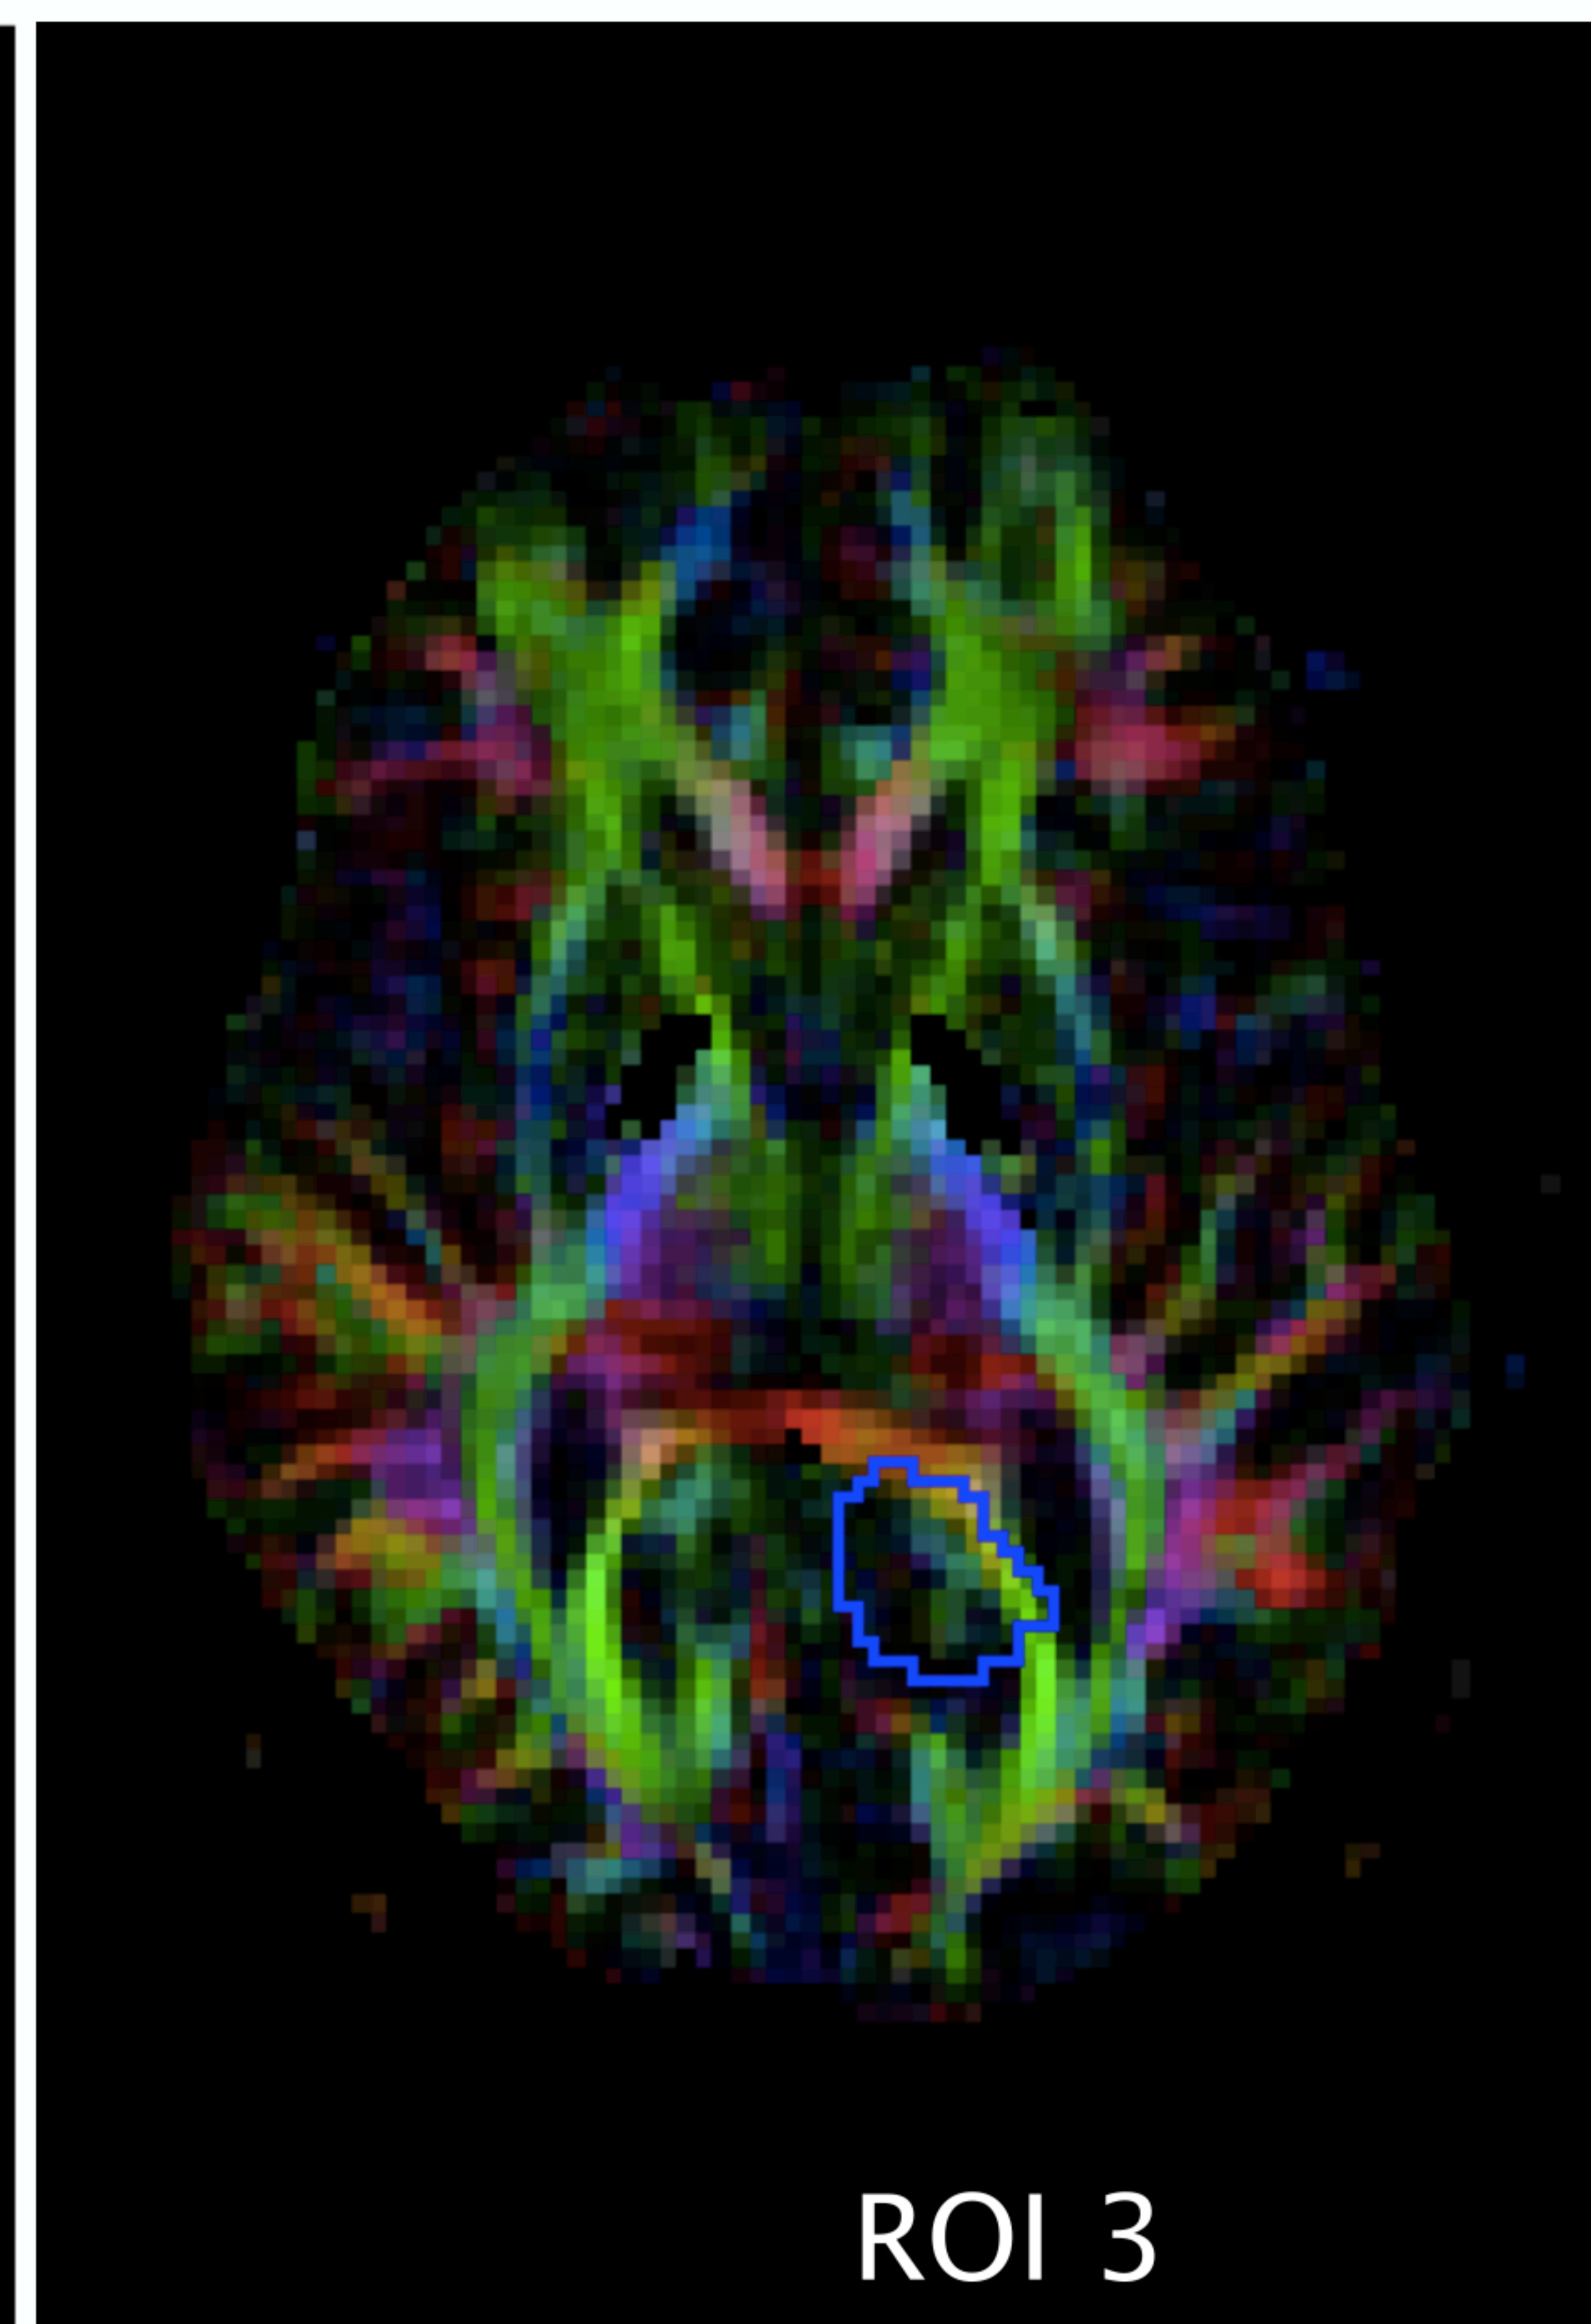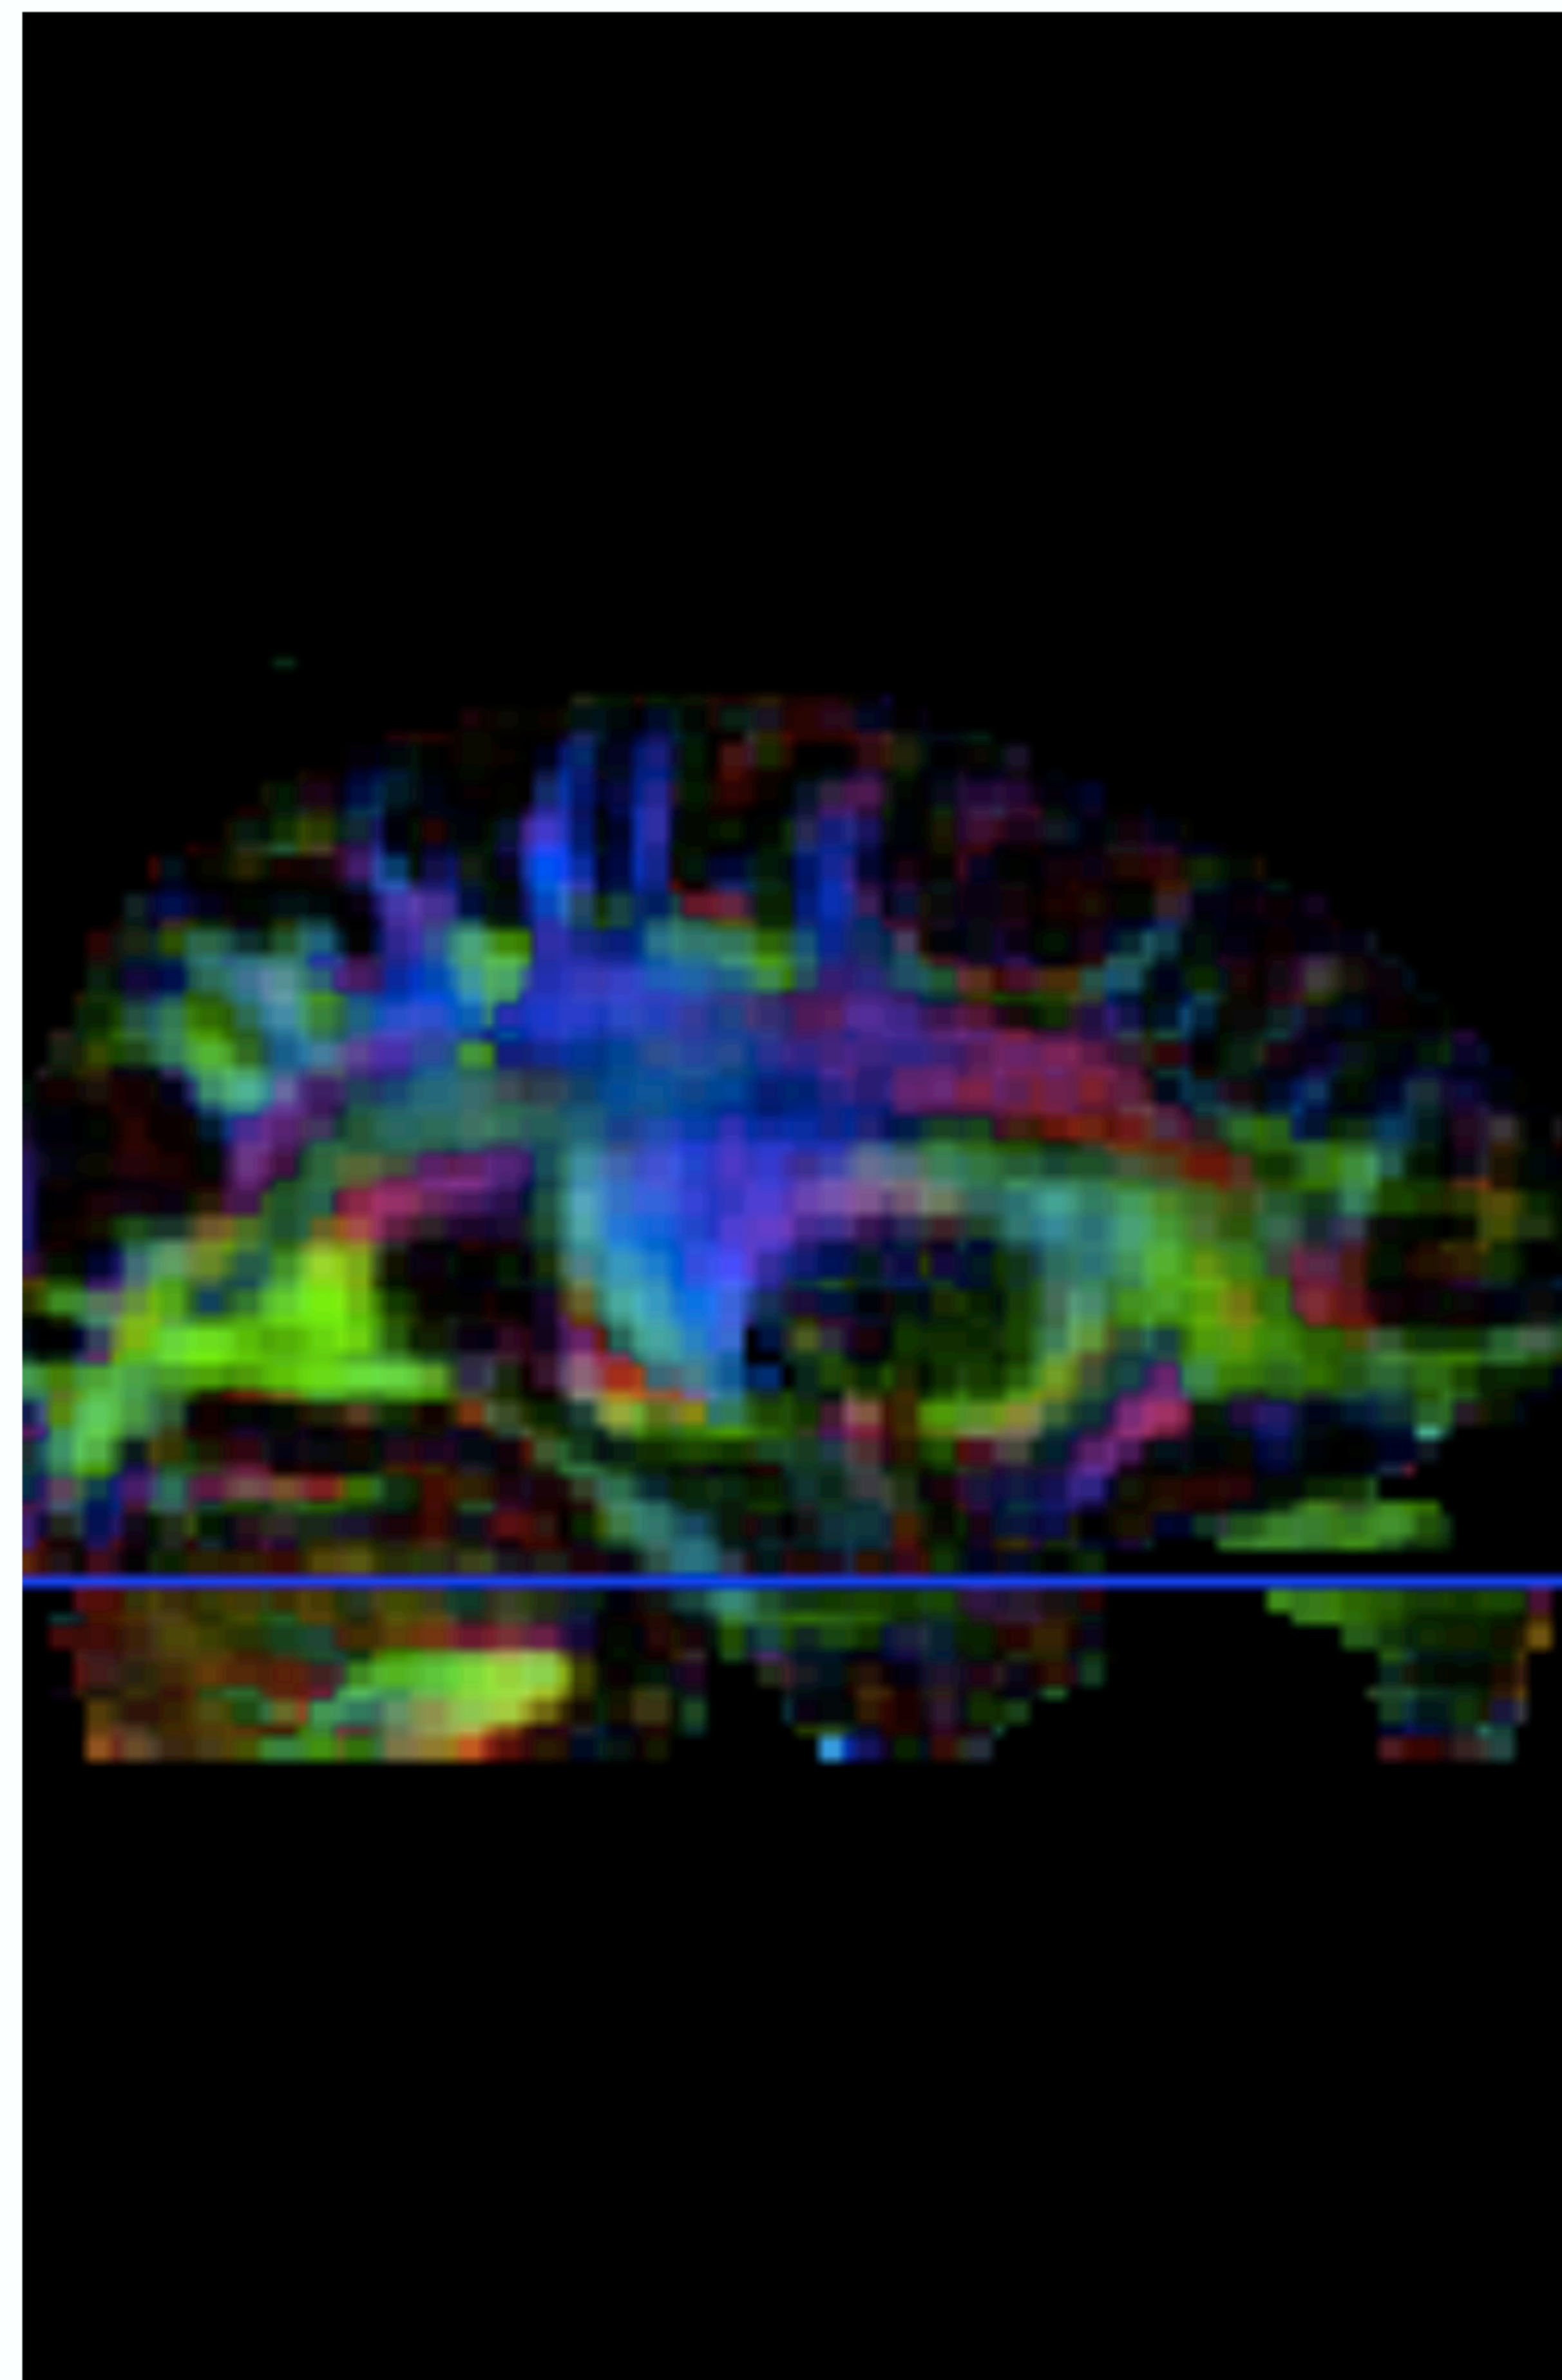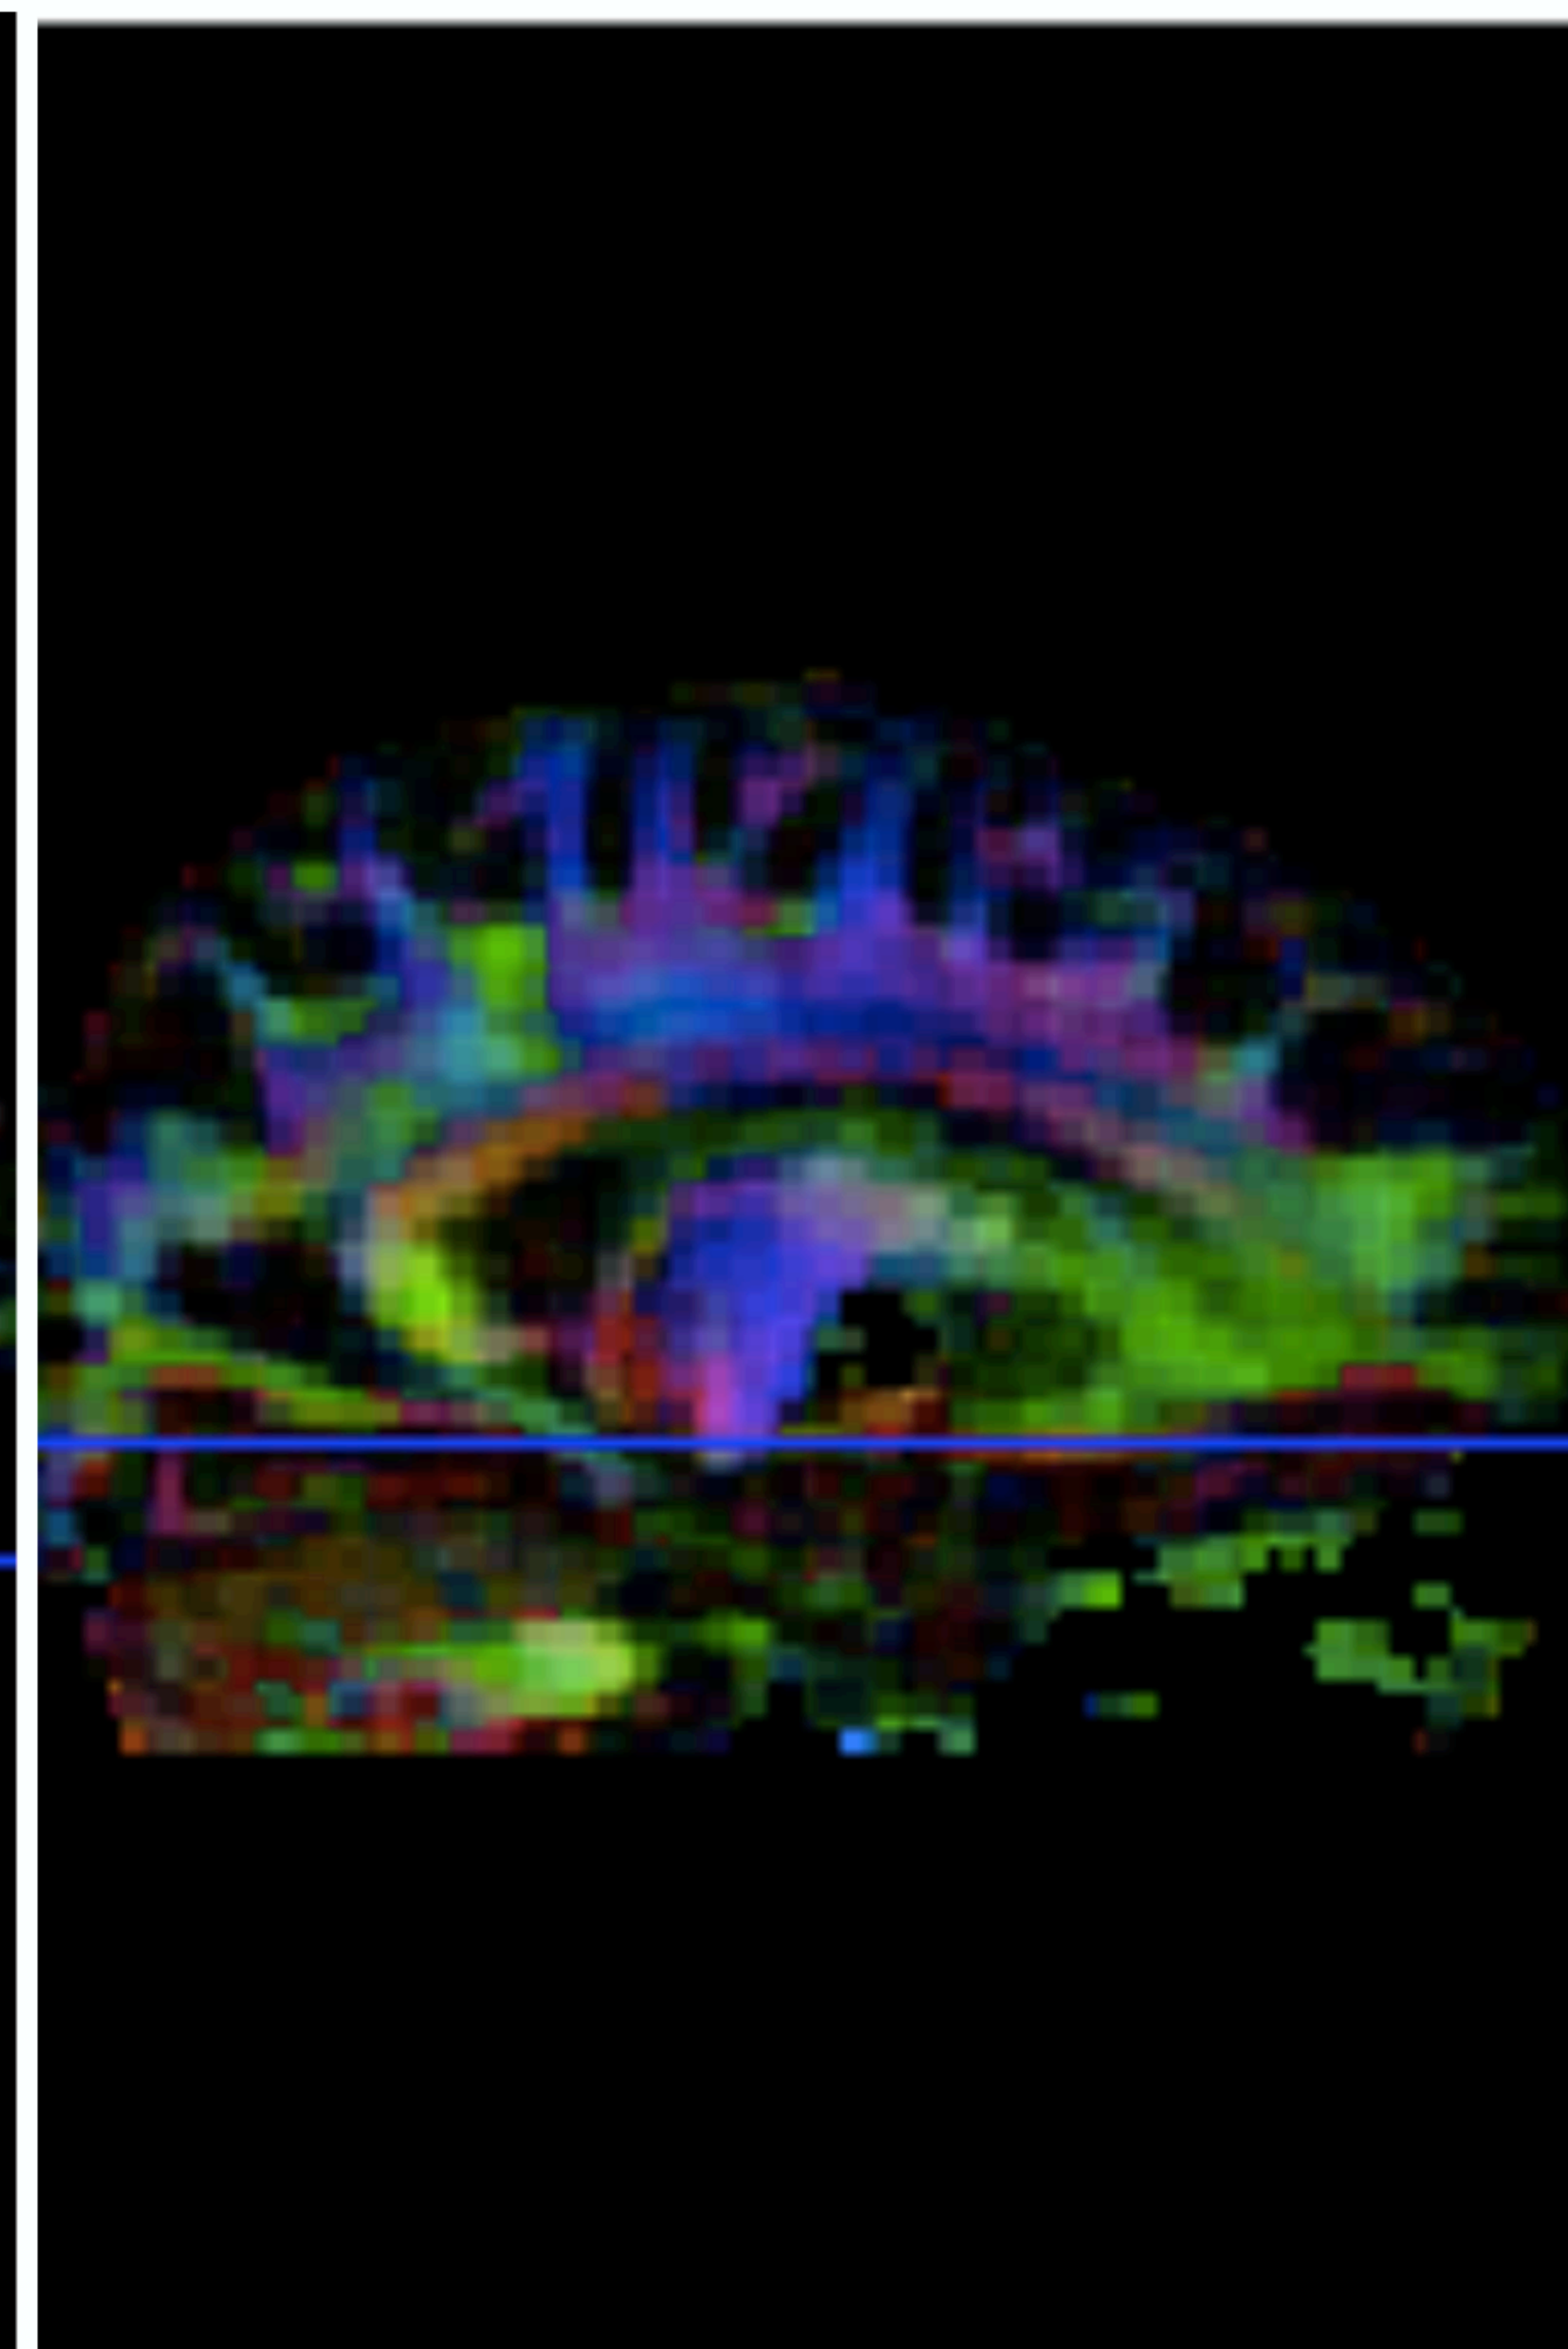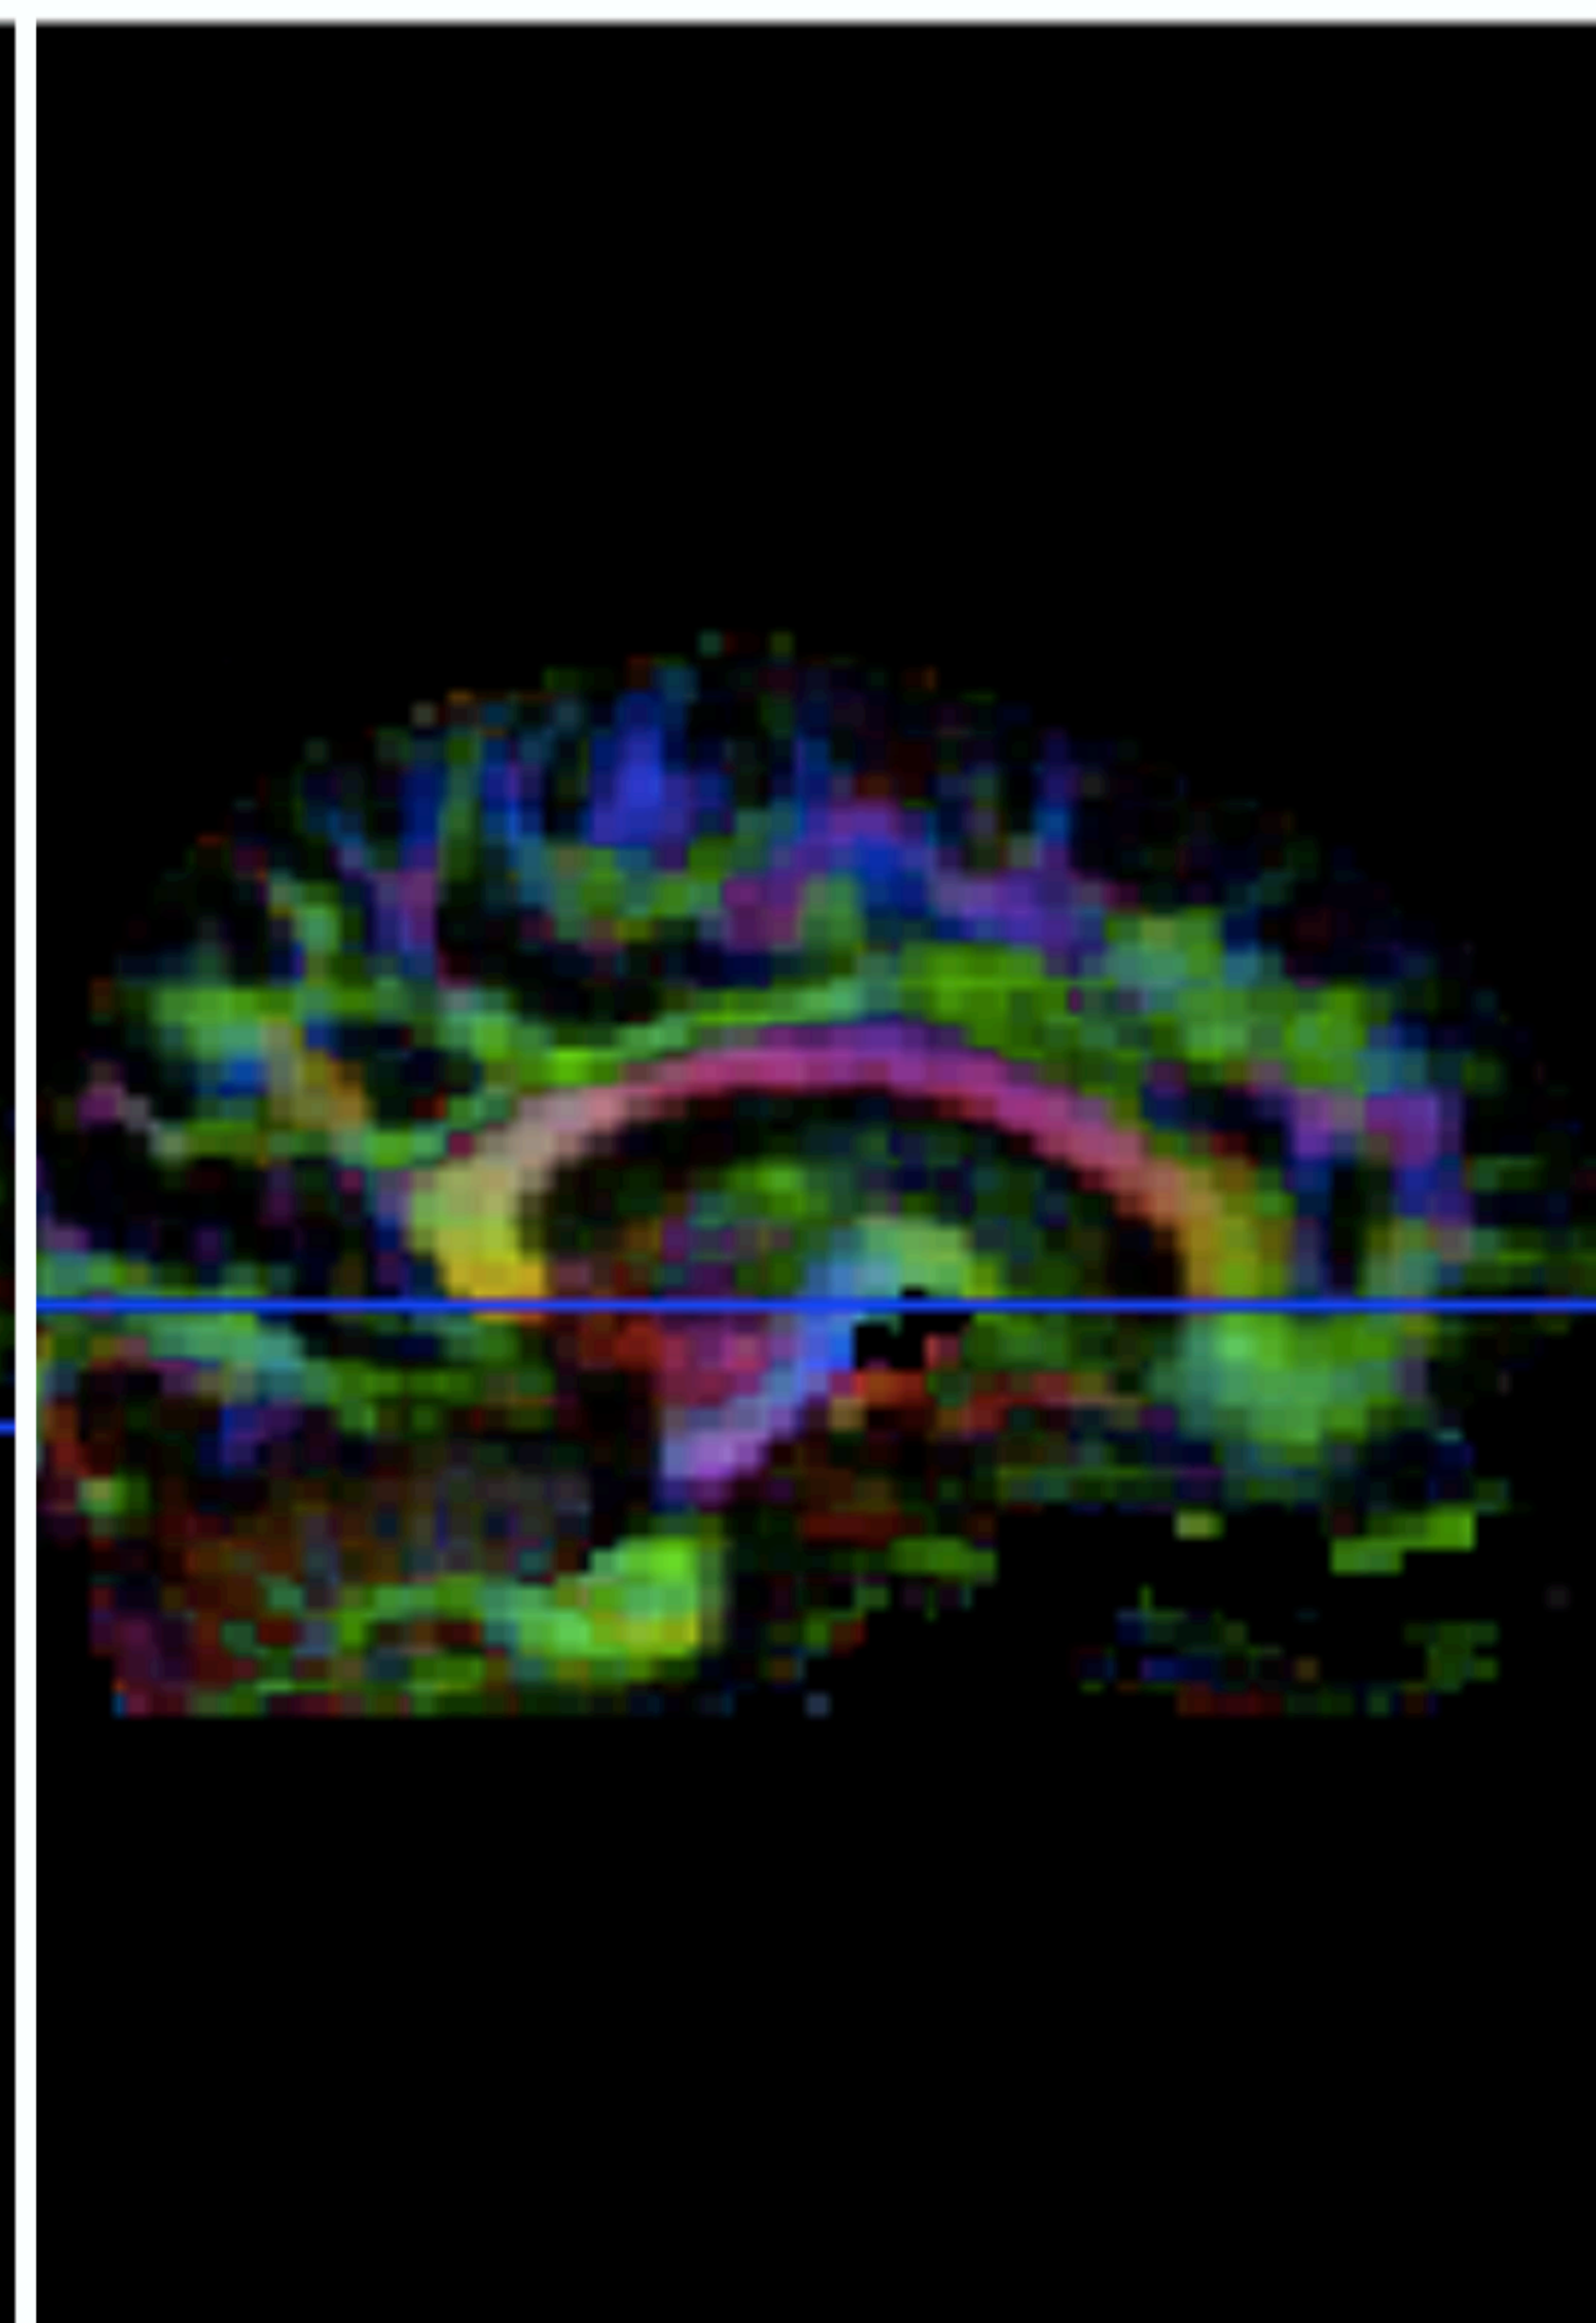

e.

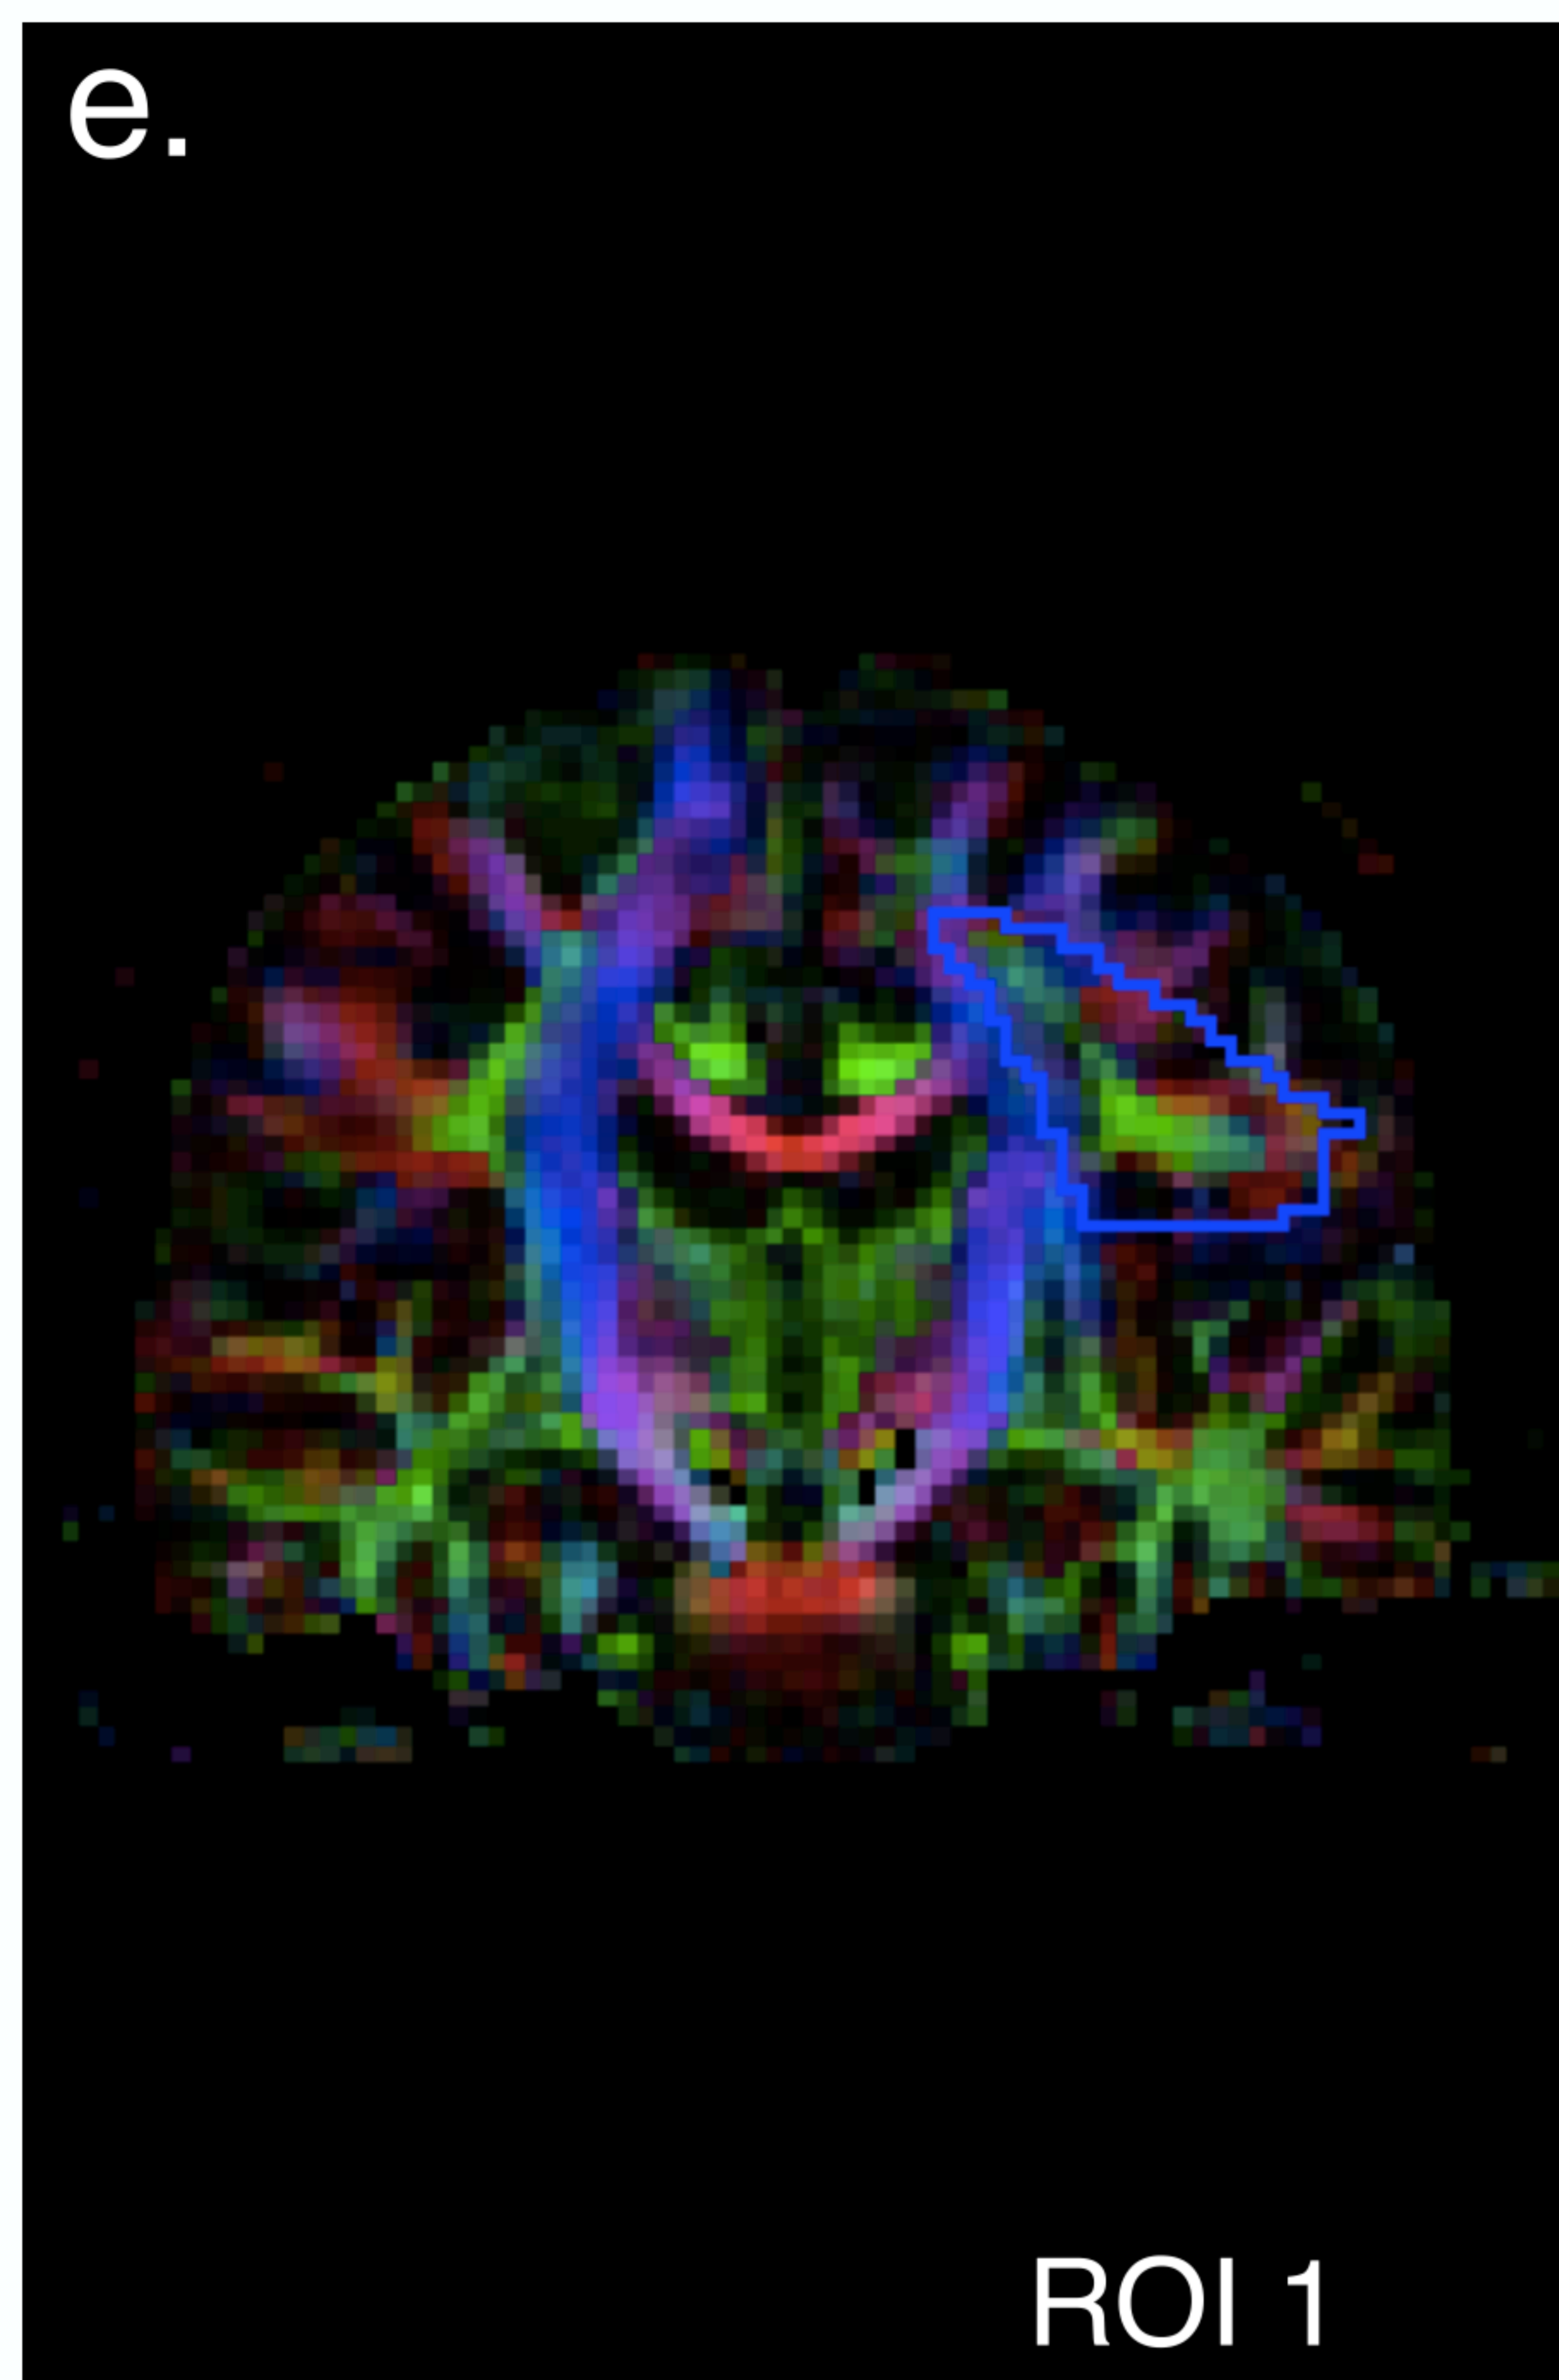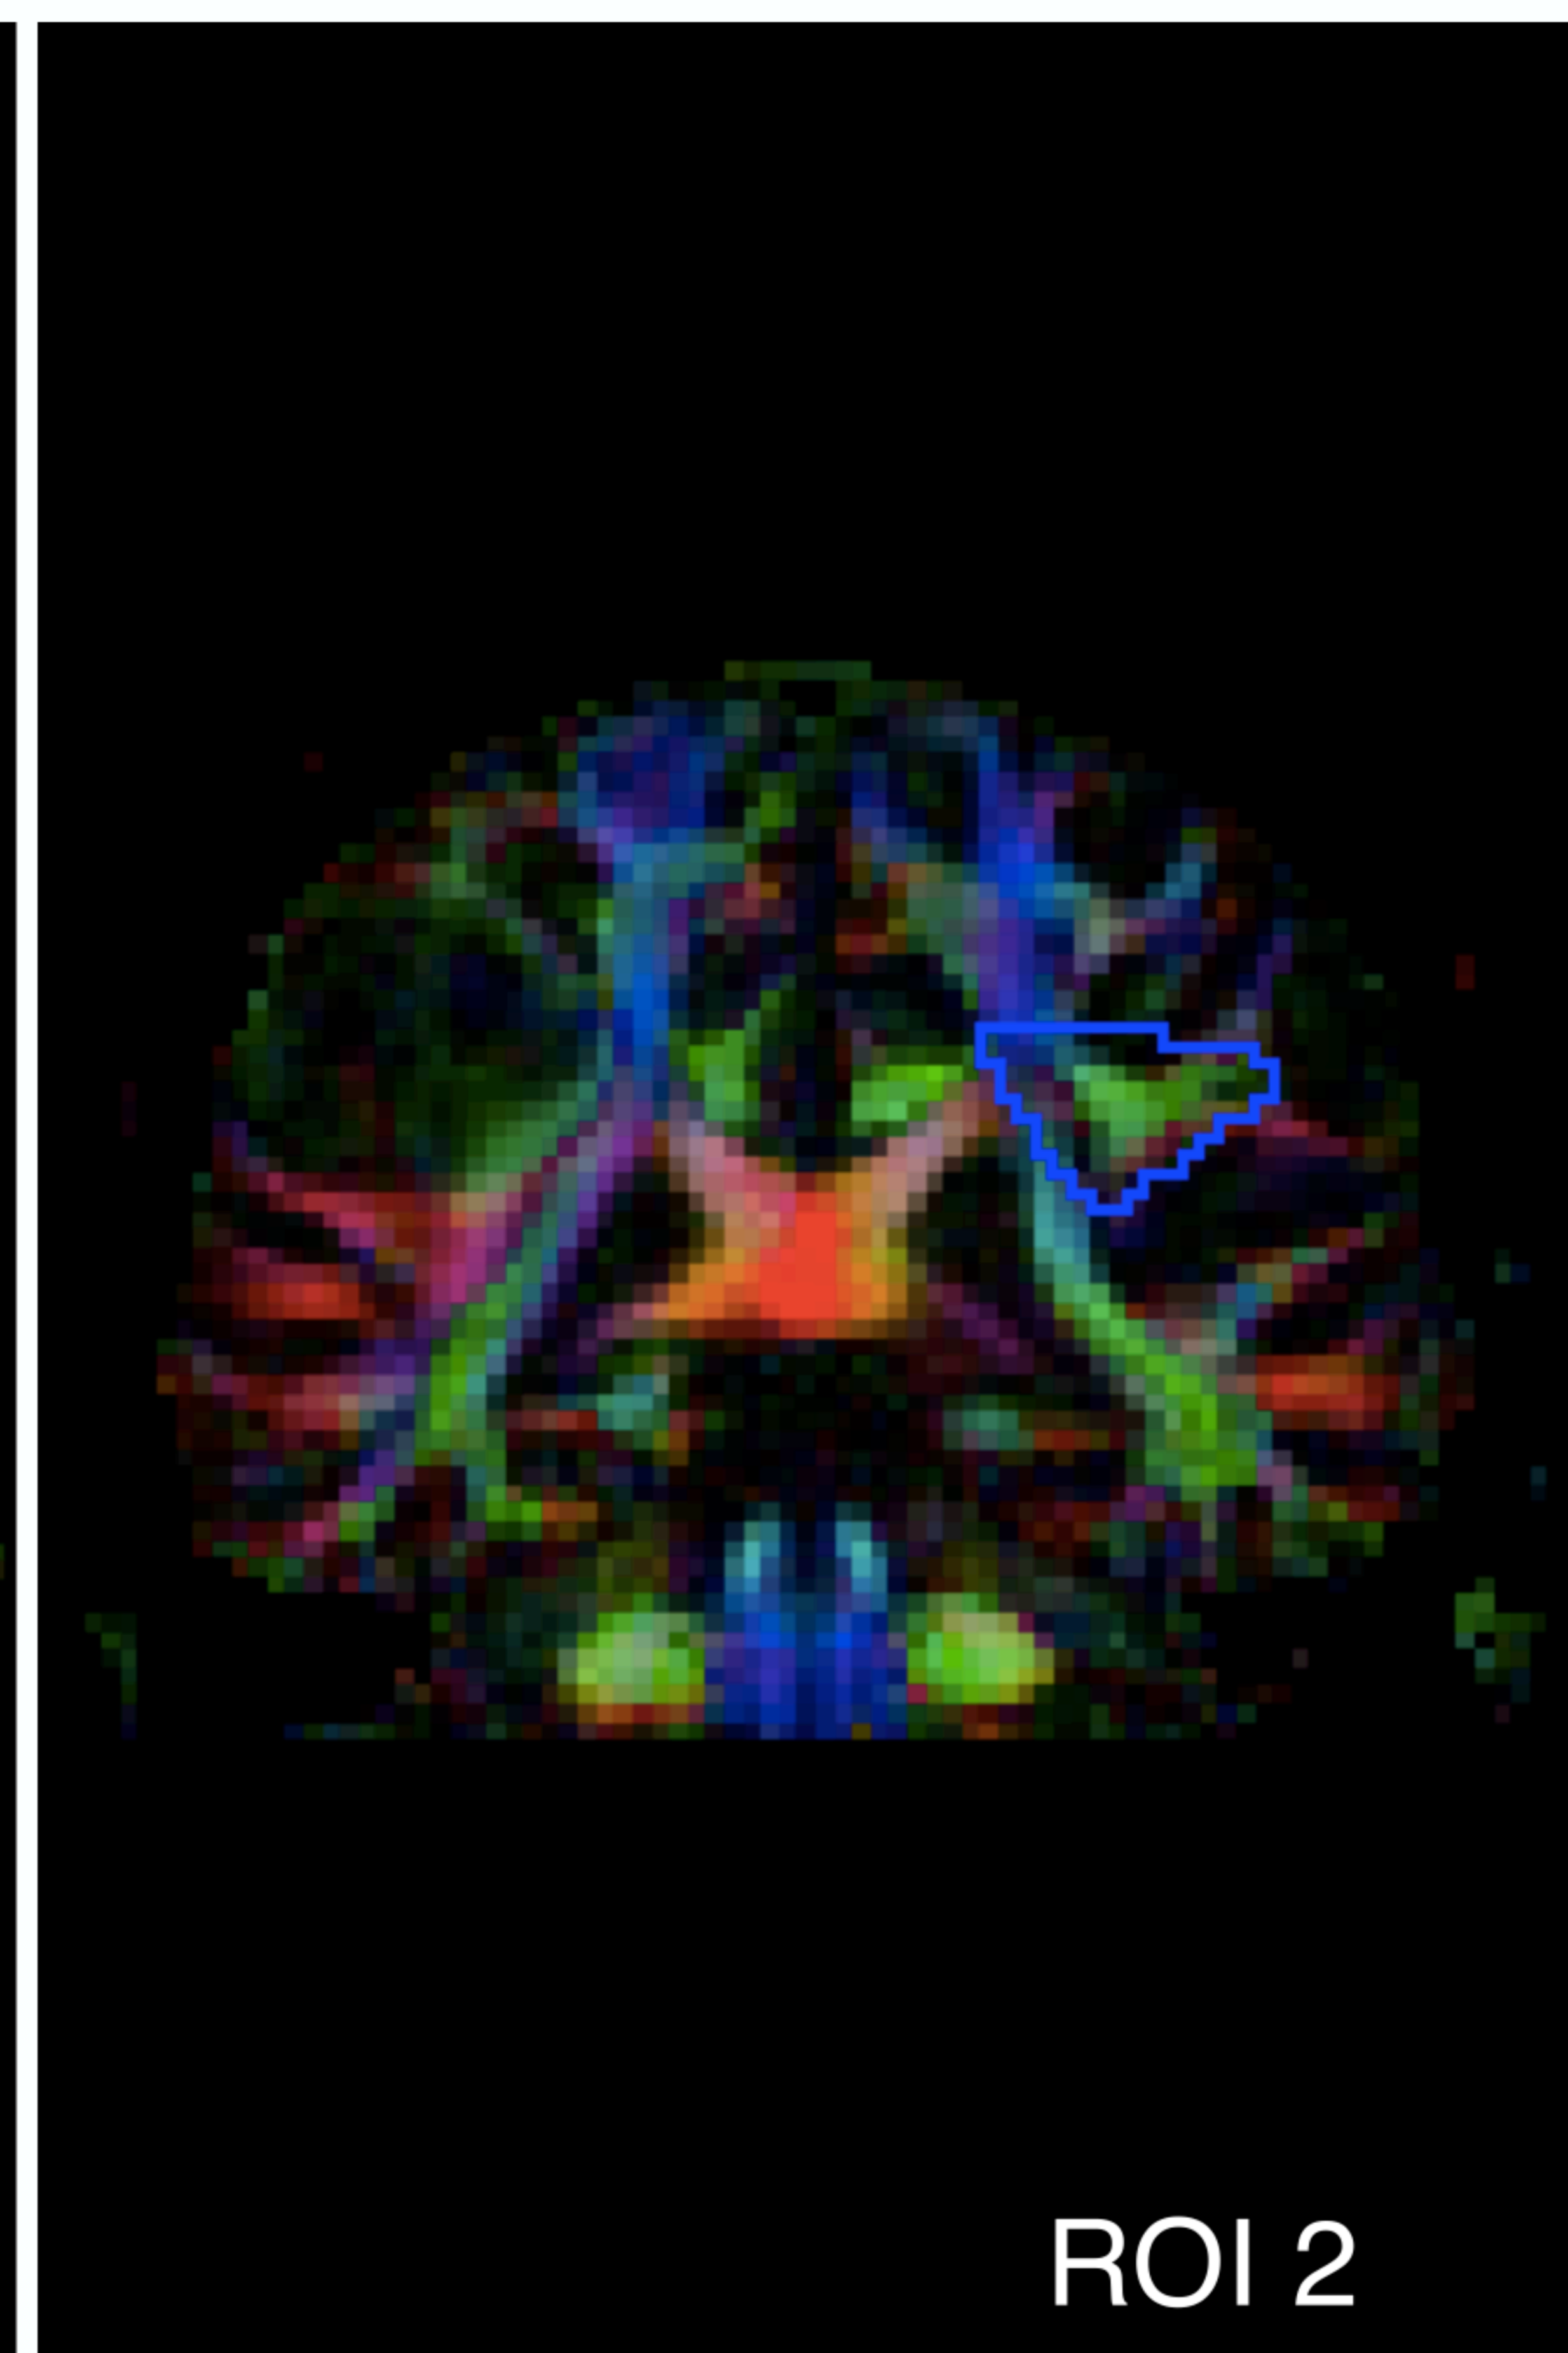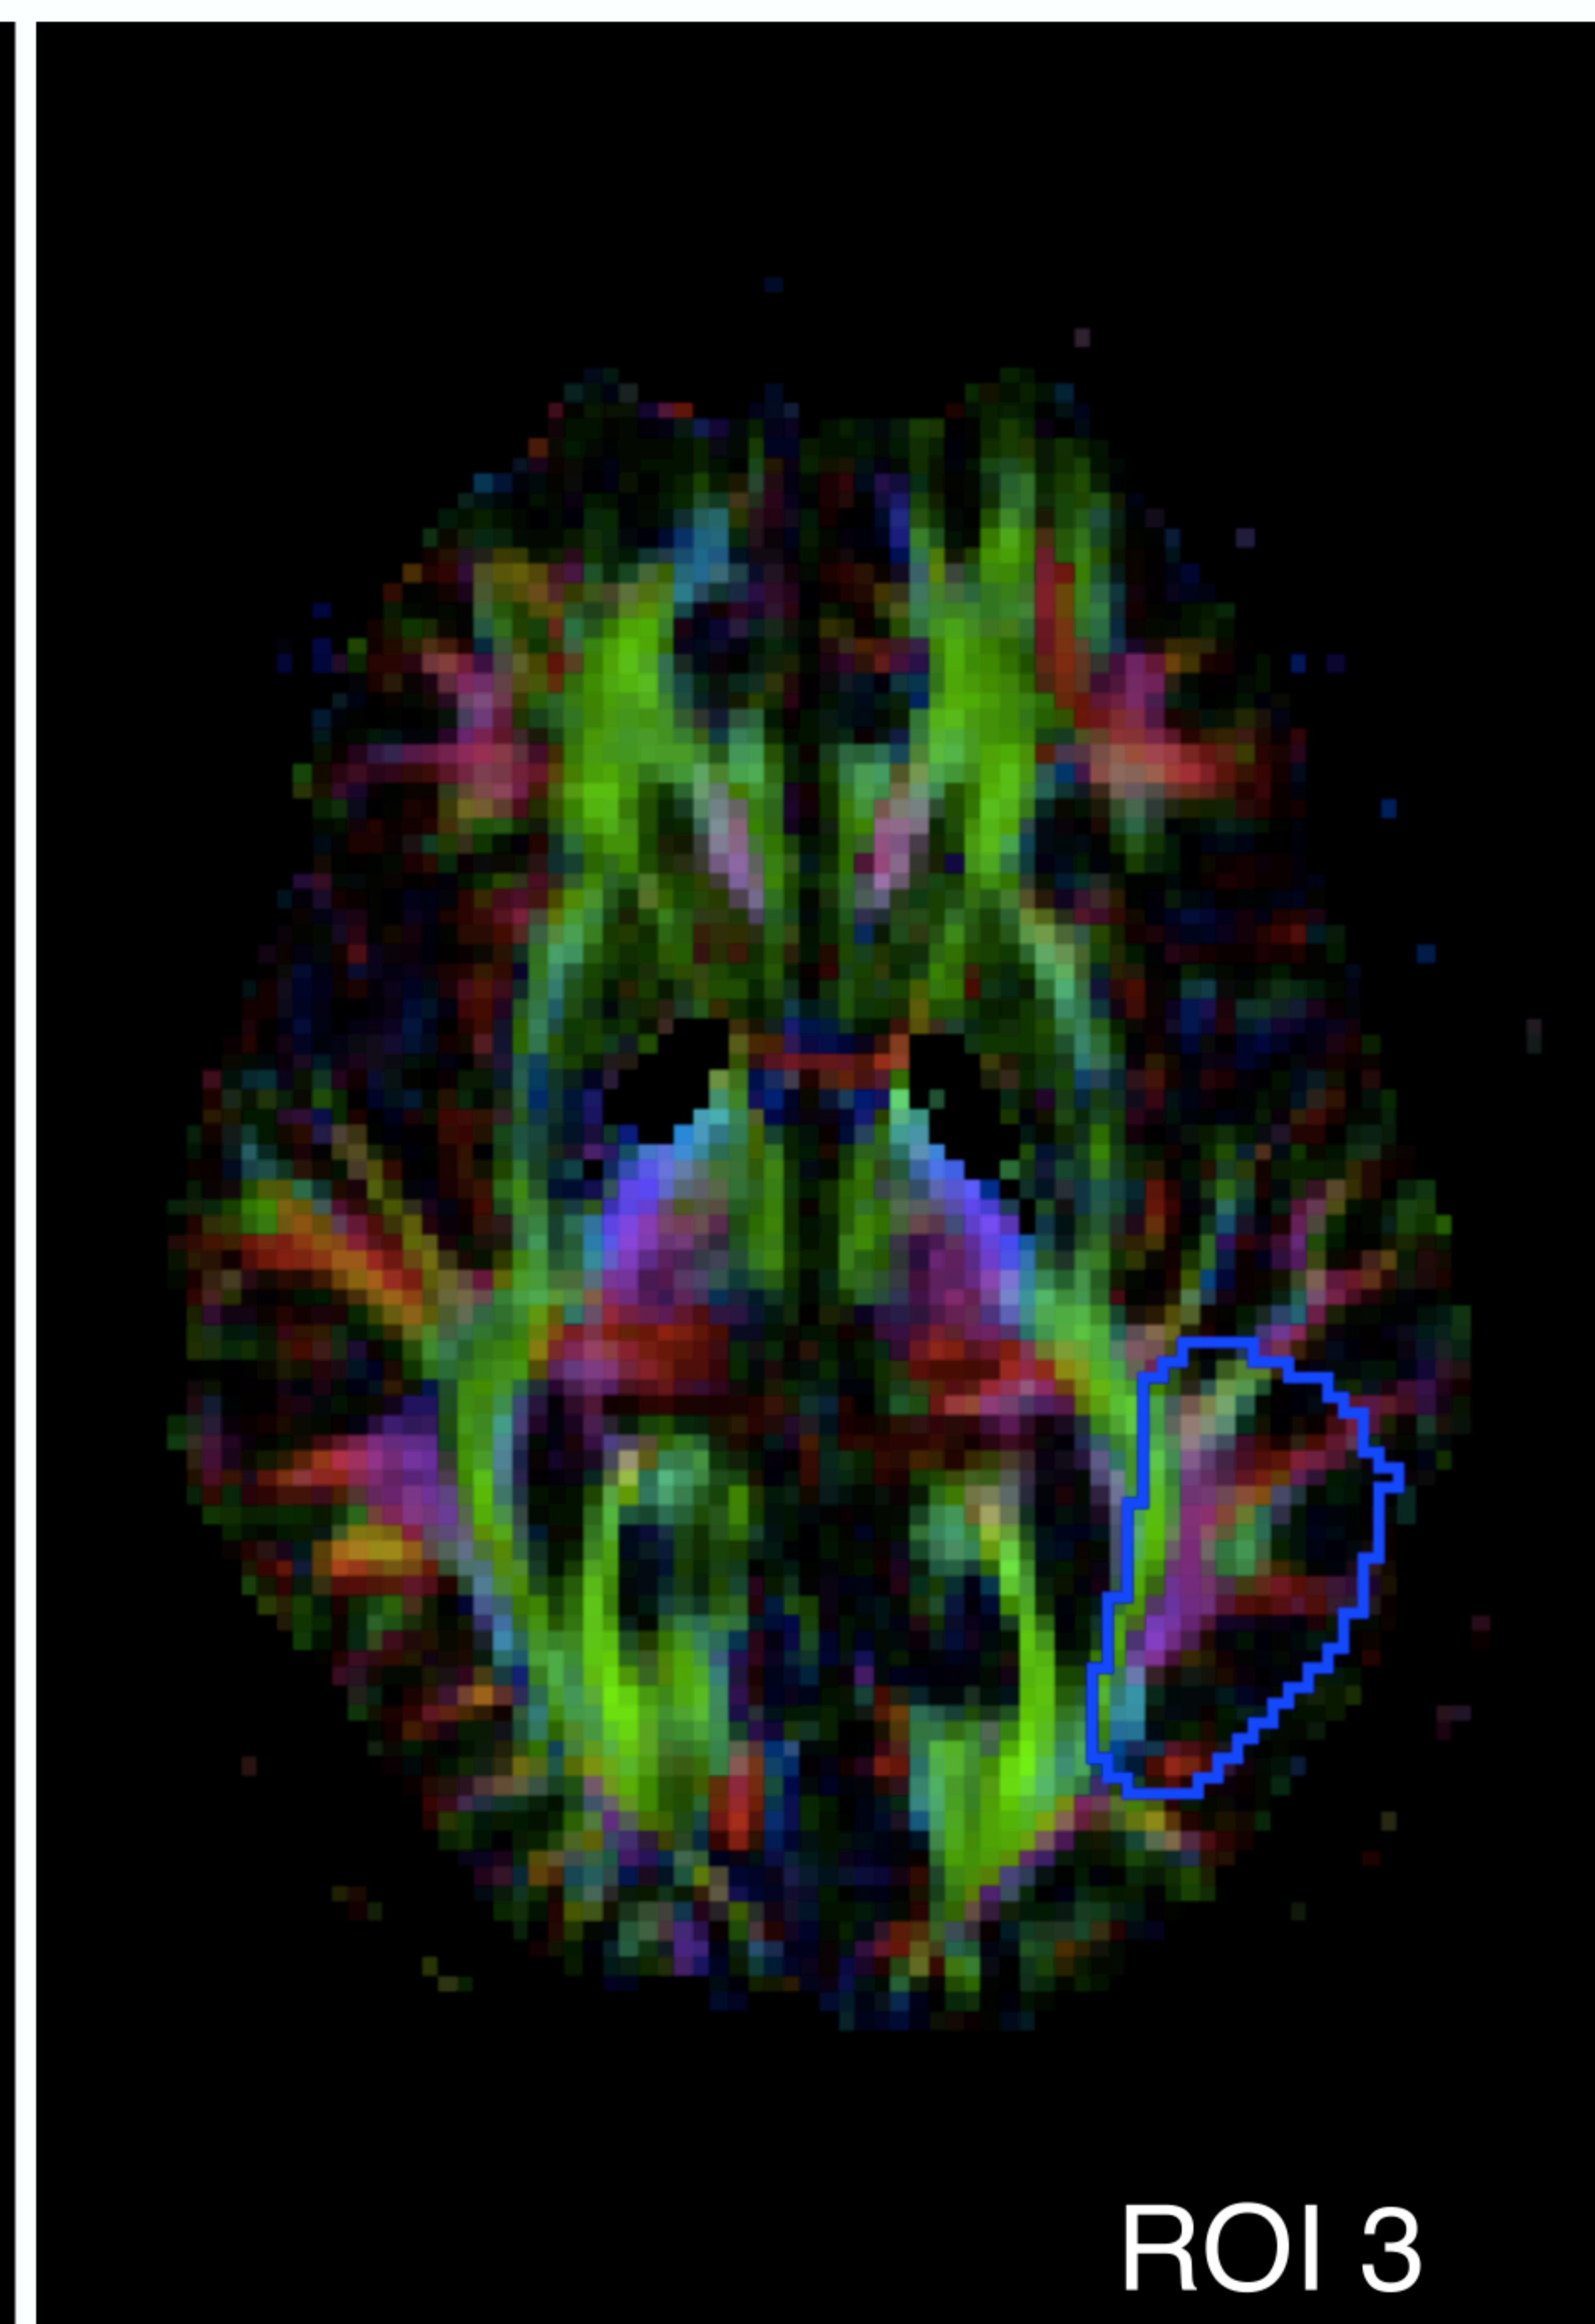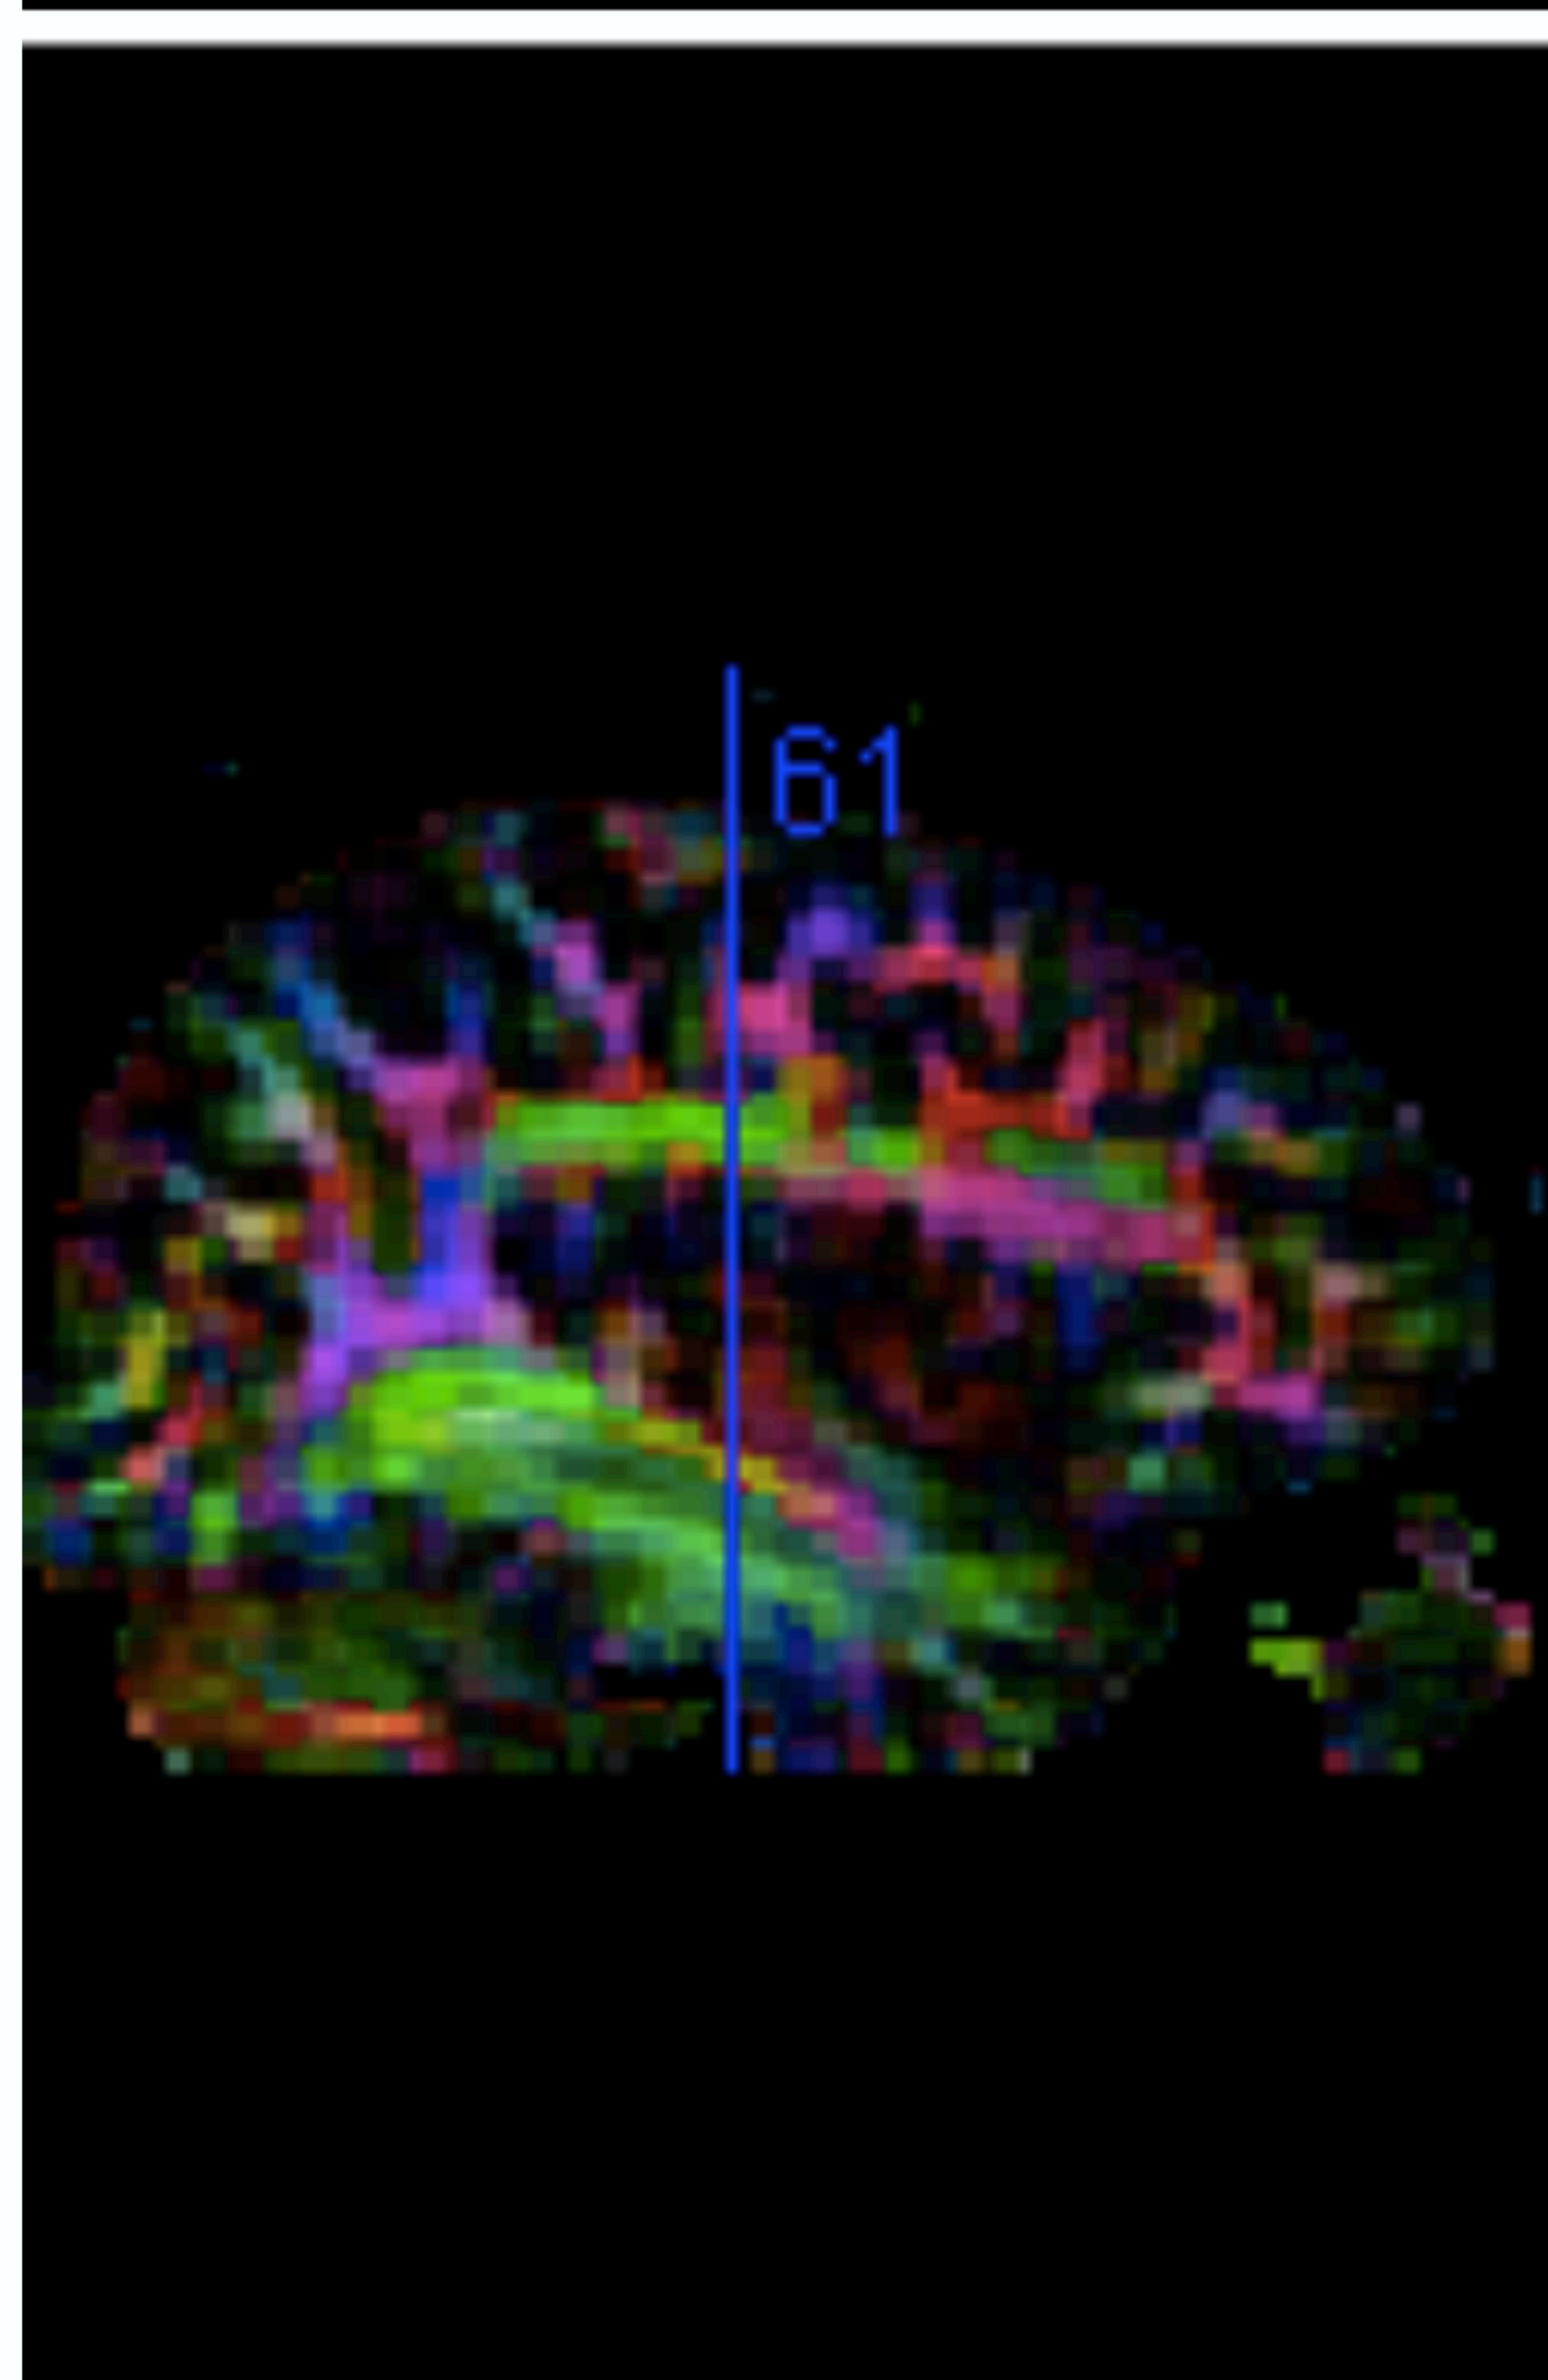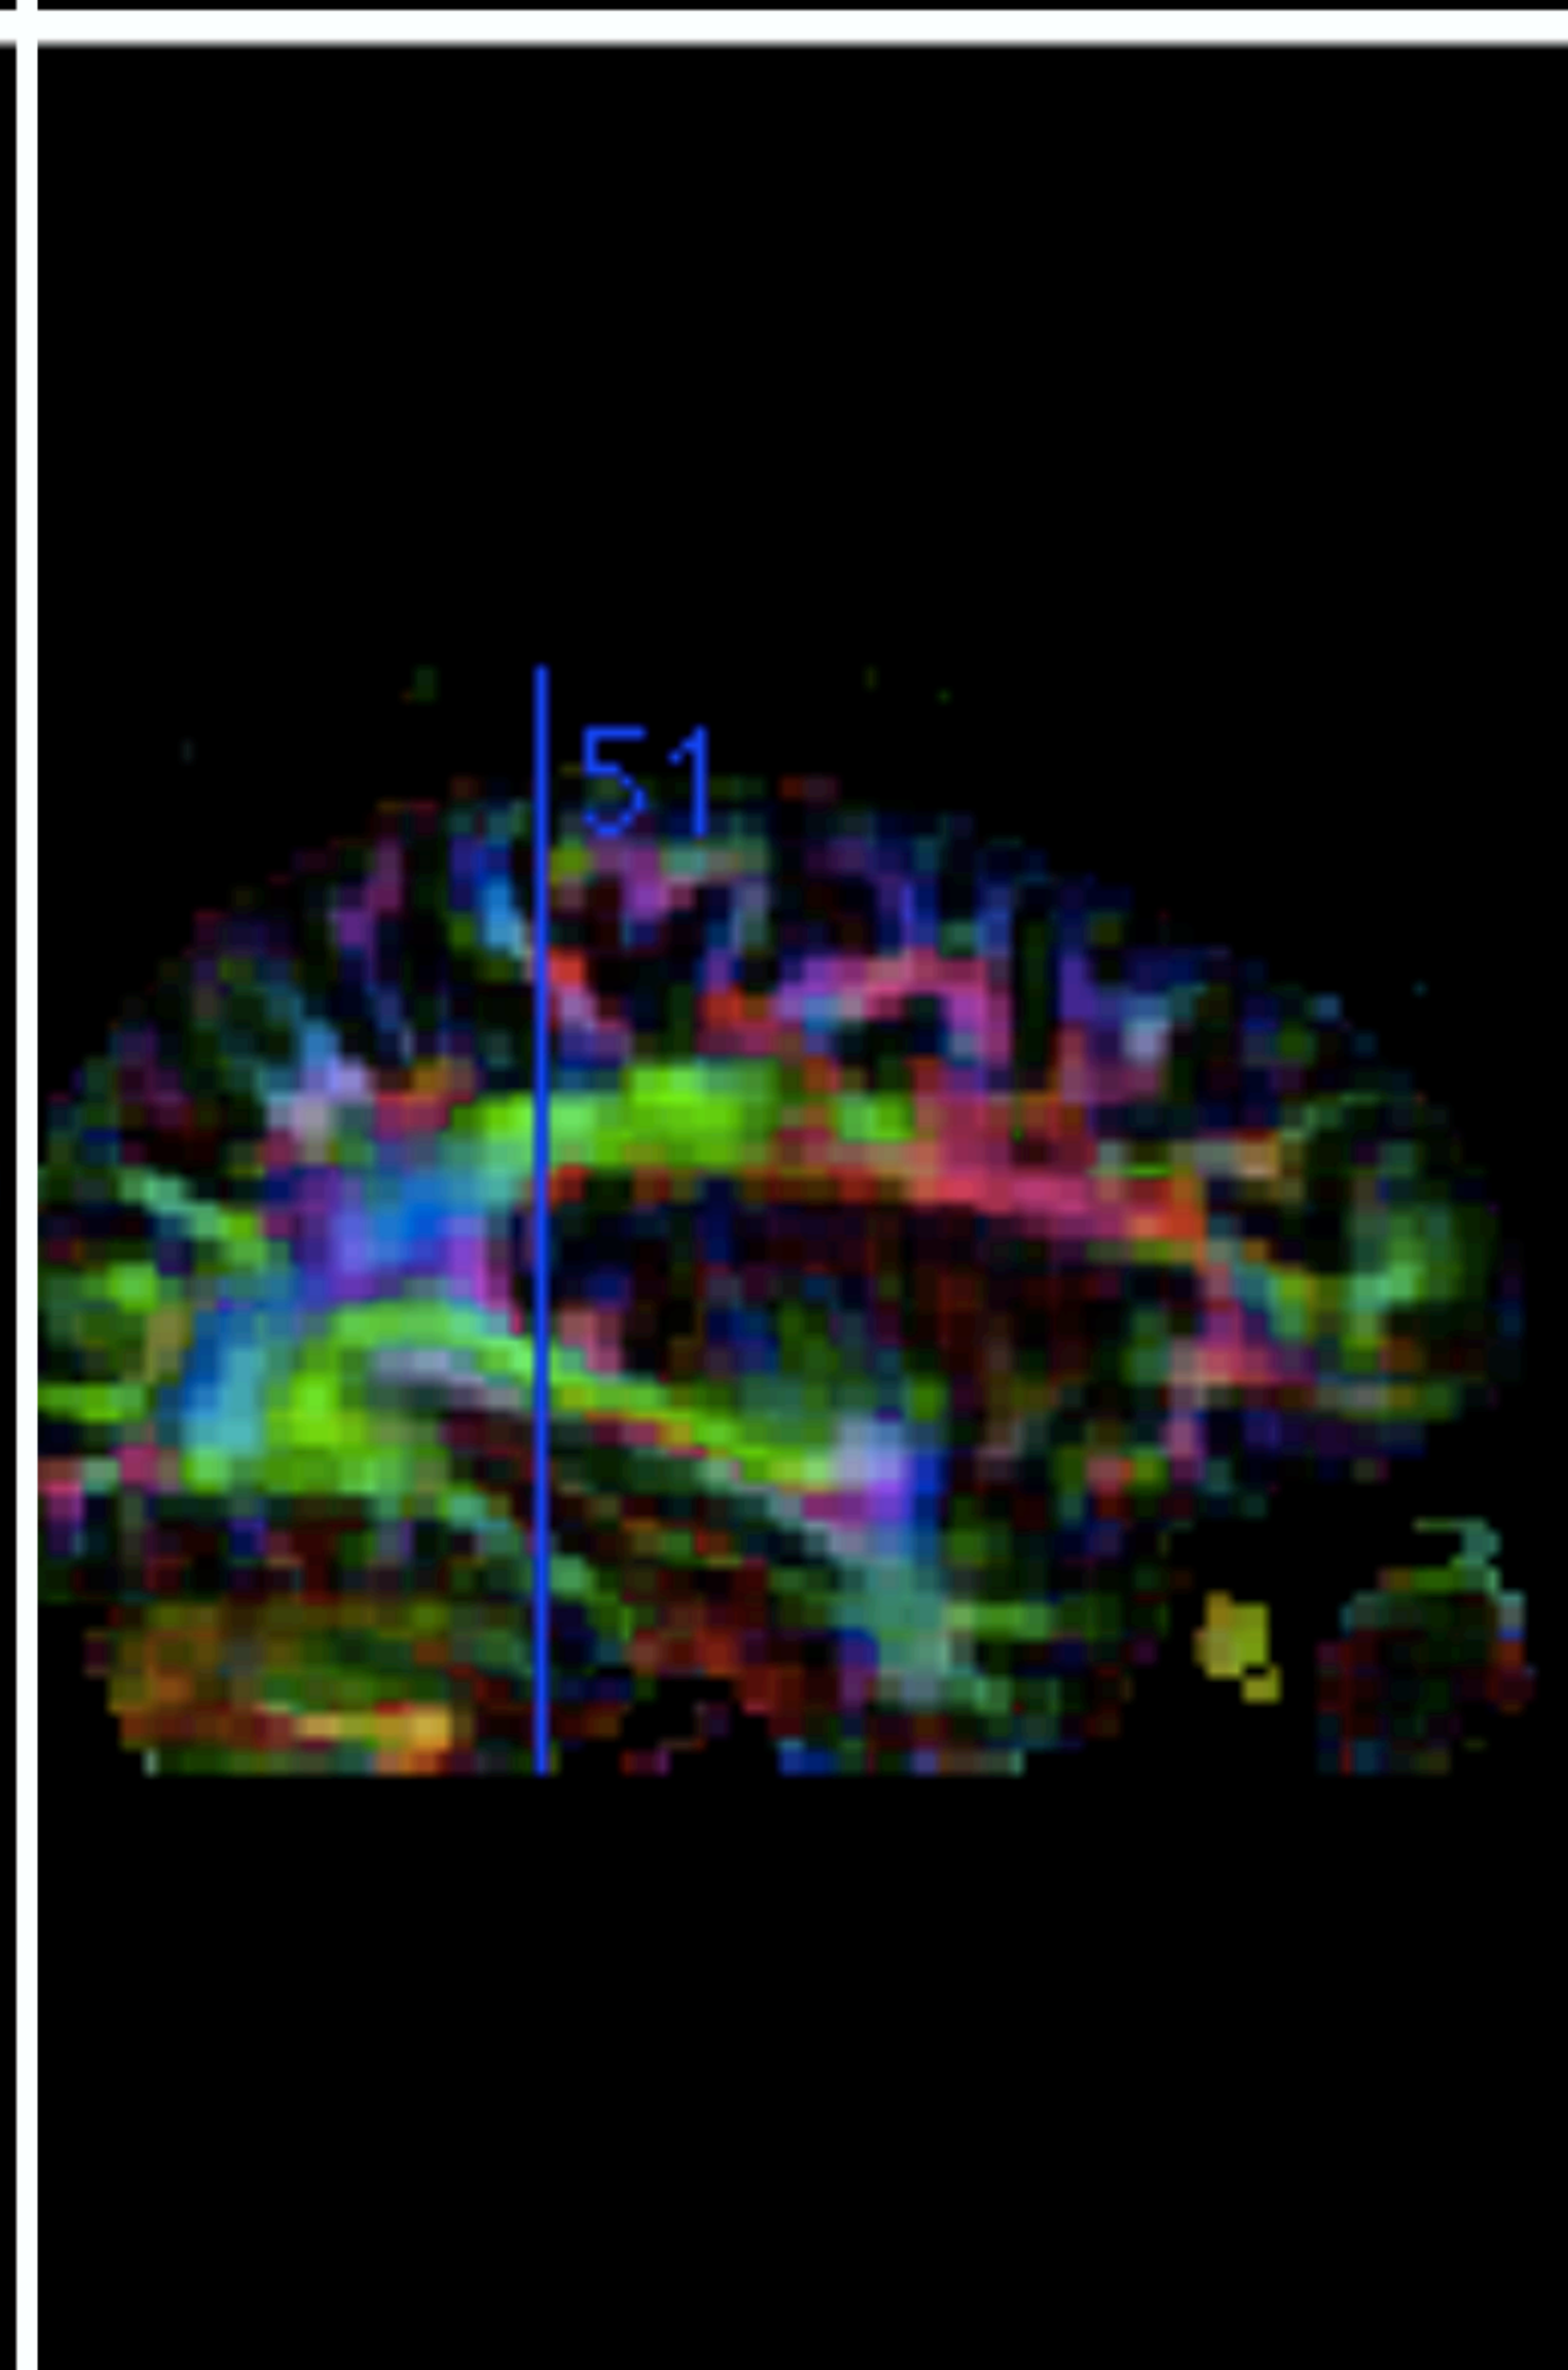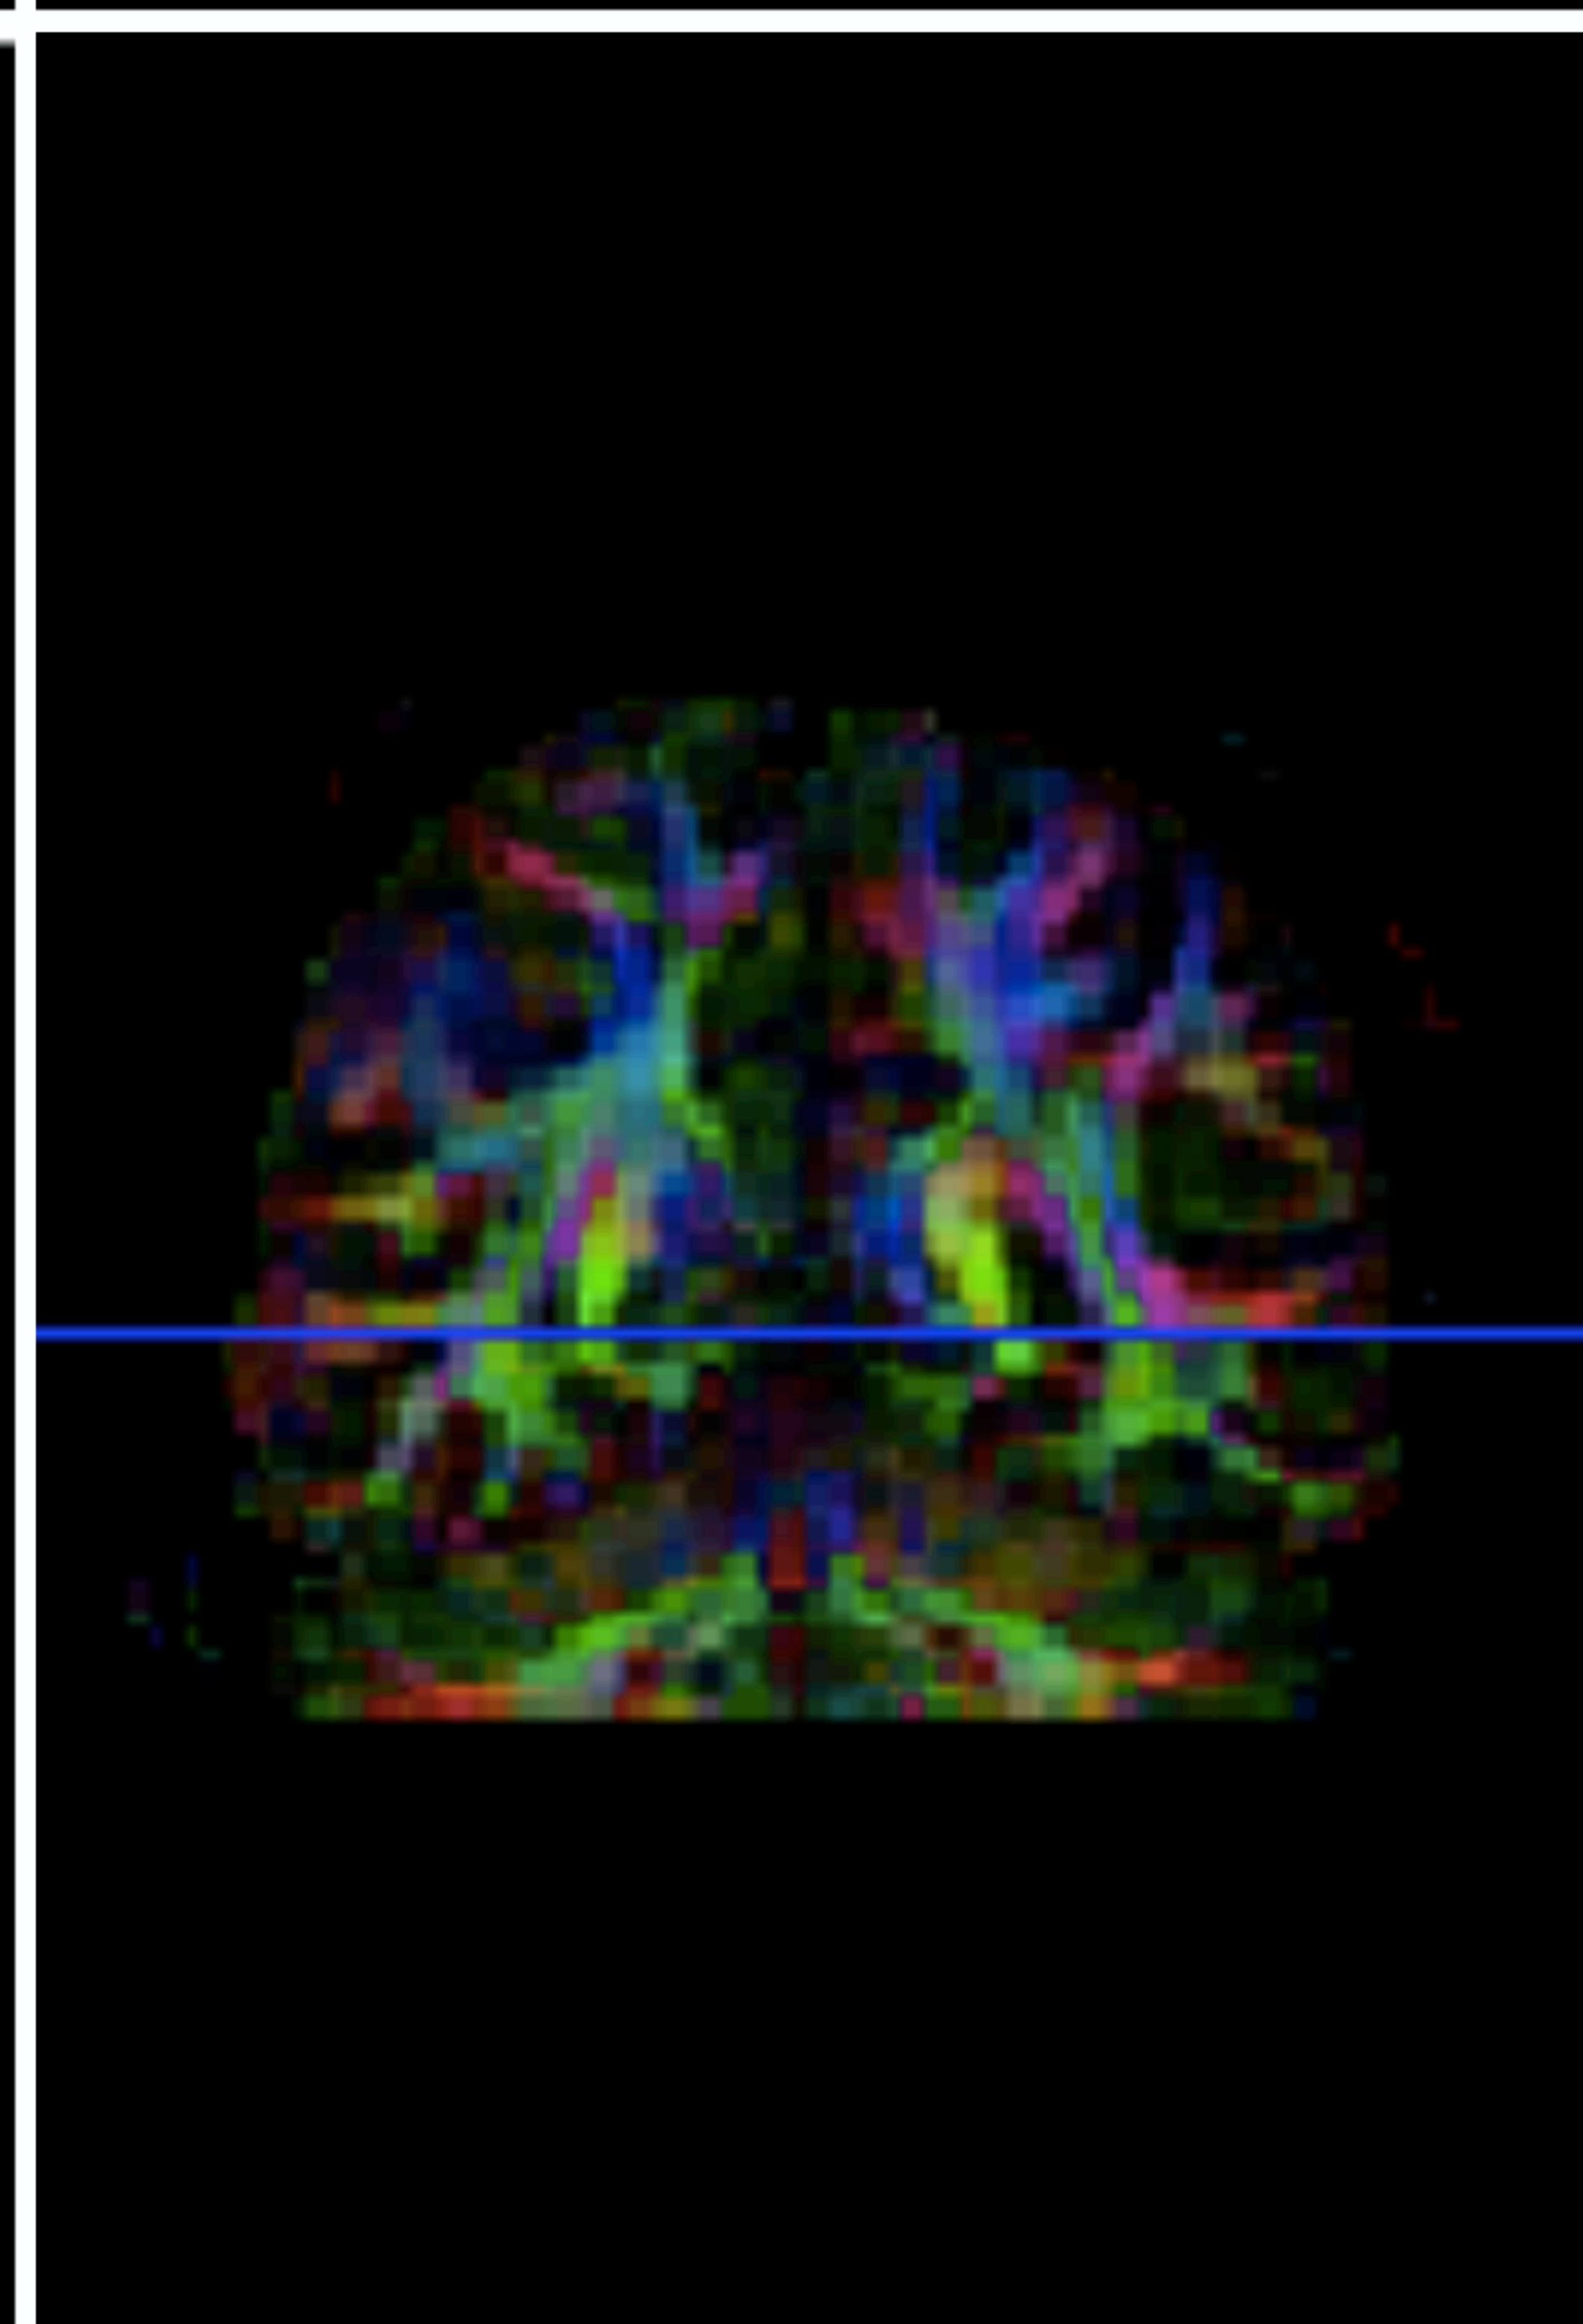

f.

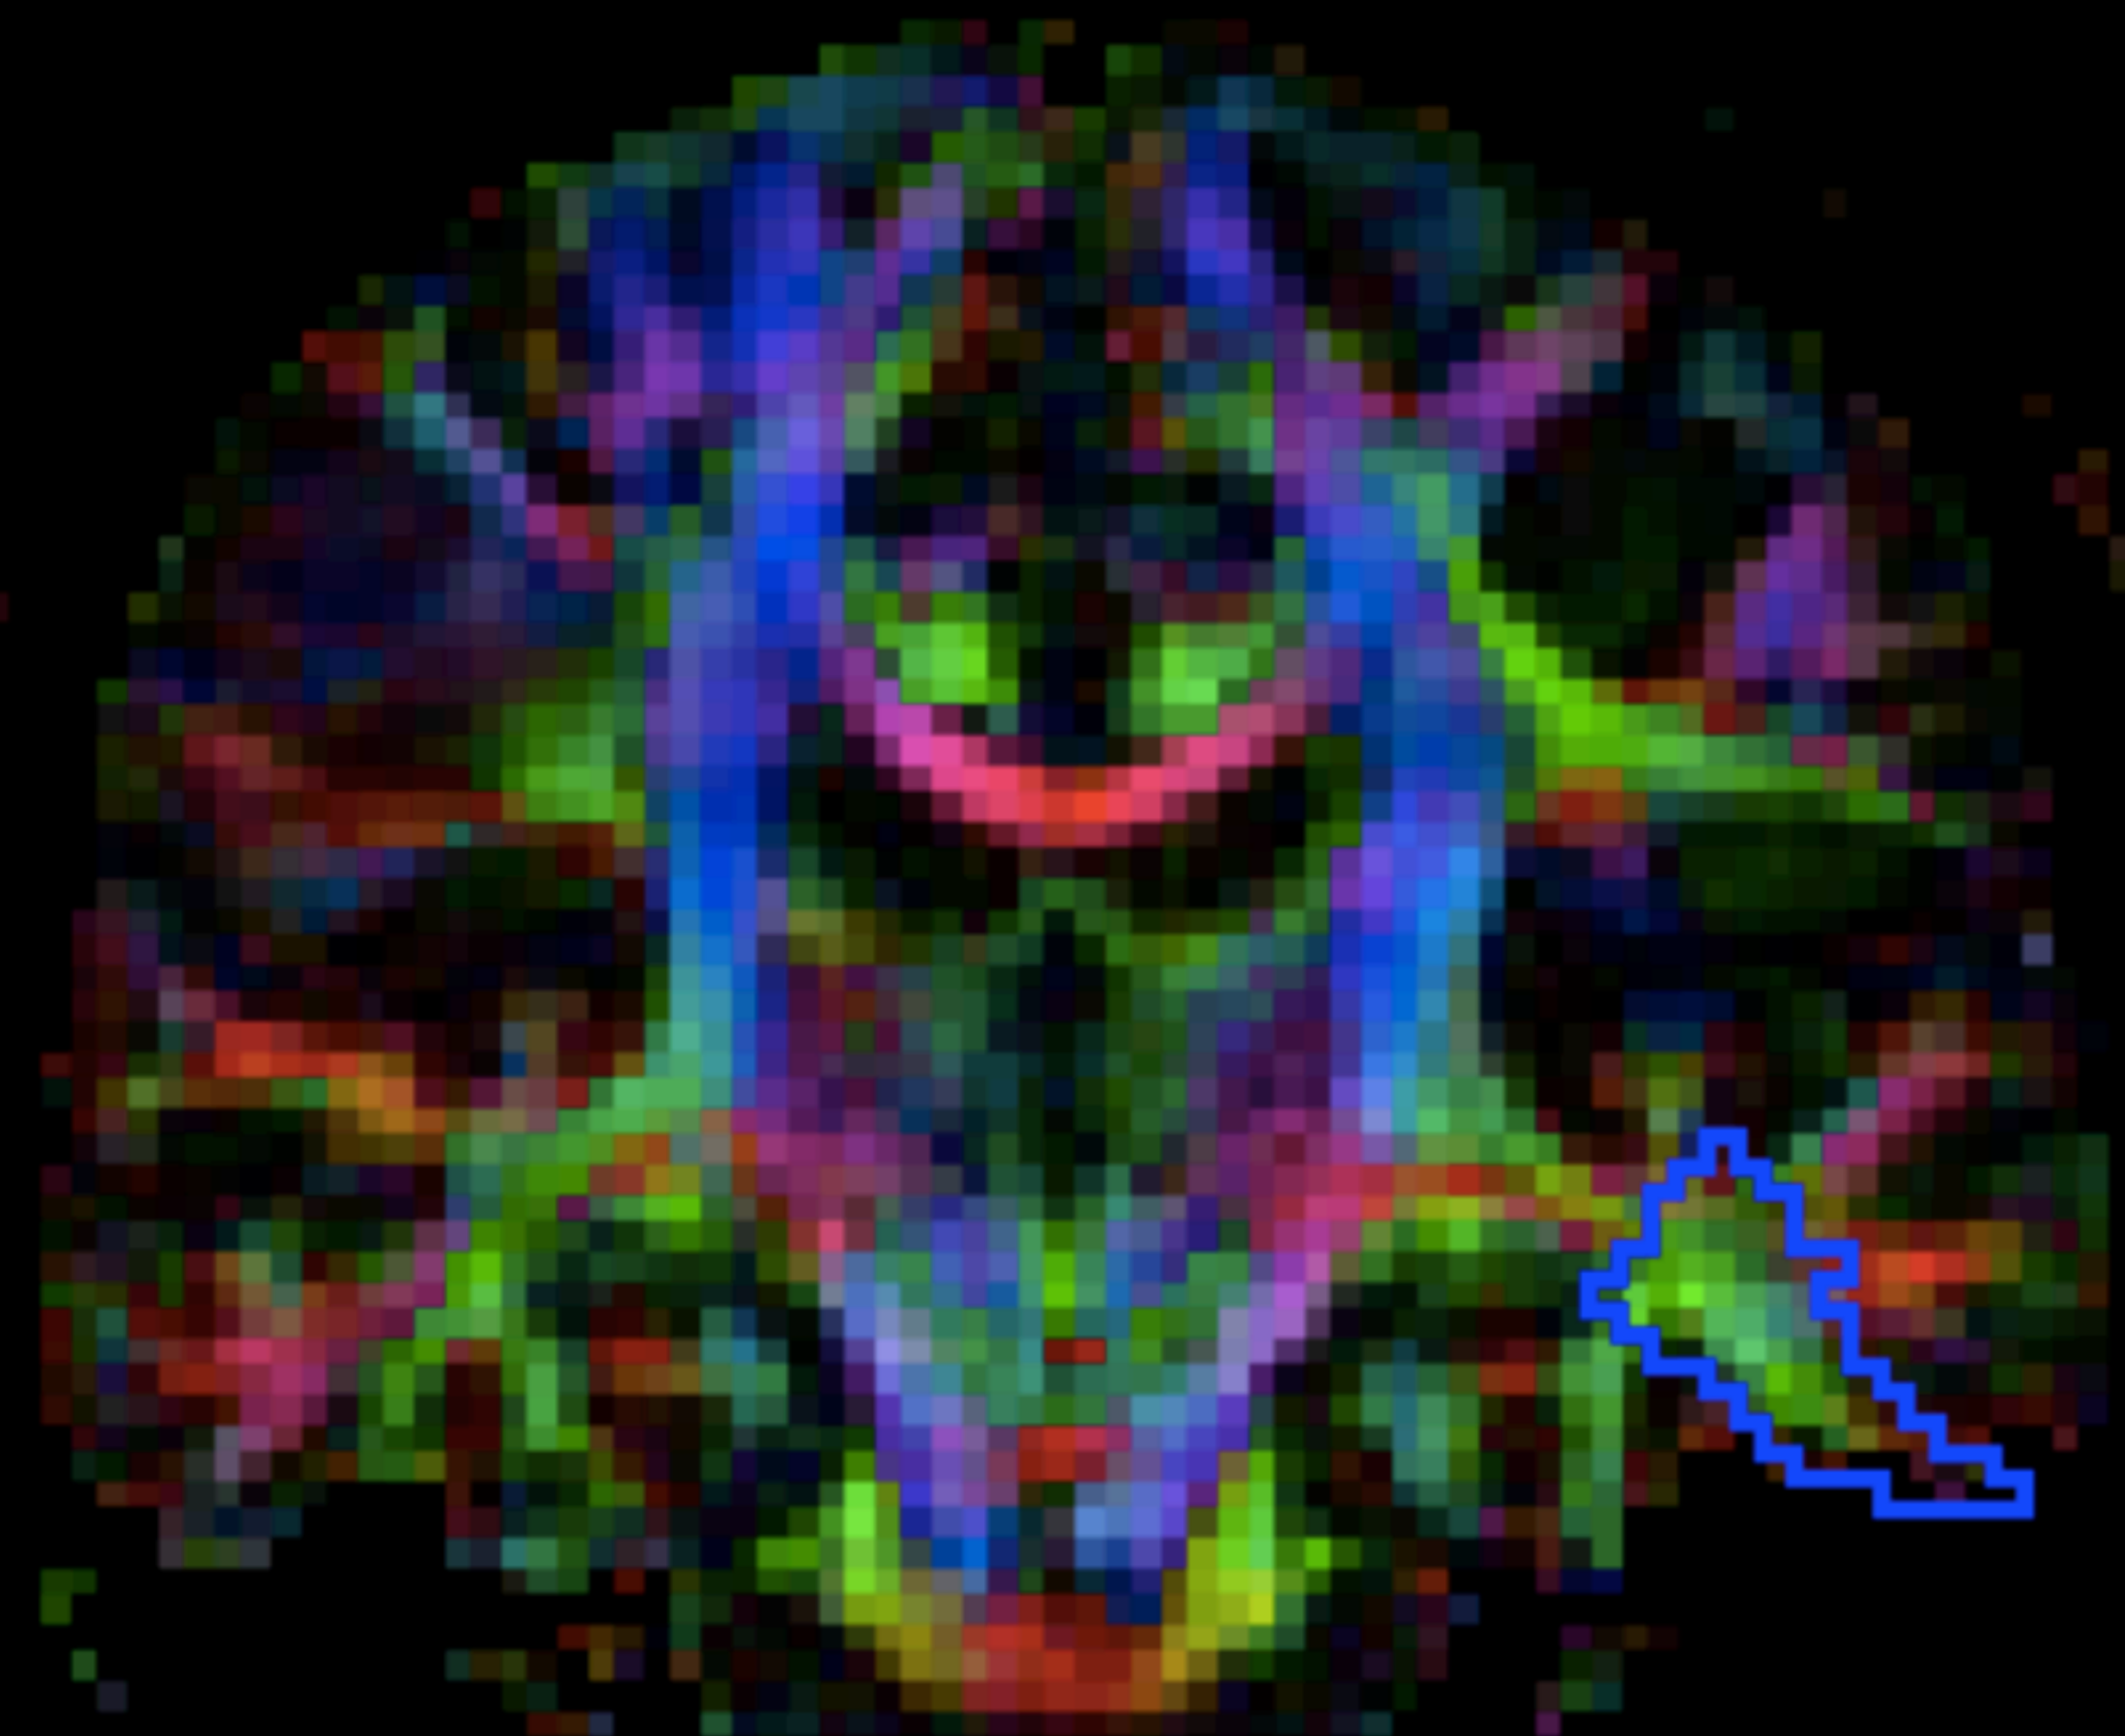

ROI 1

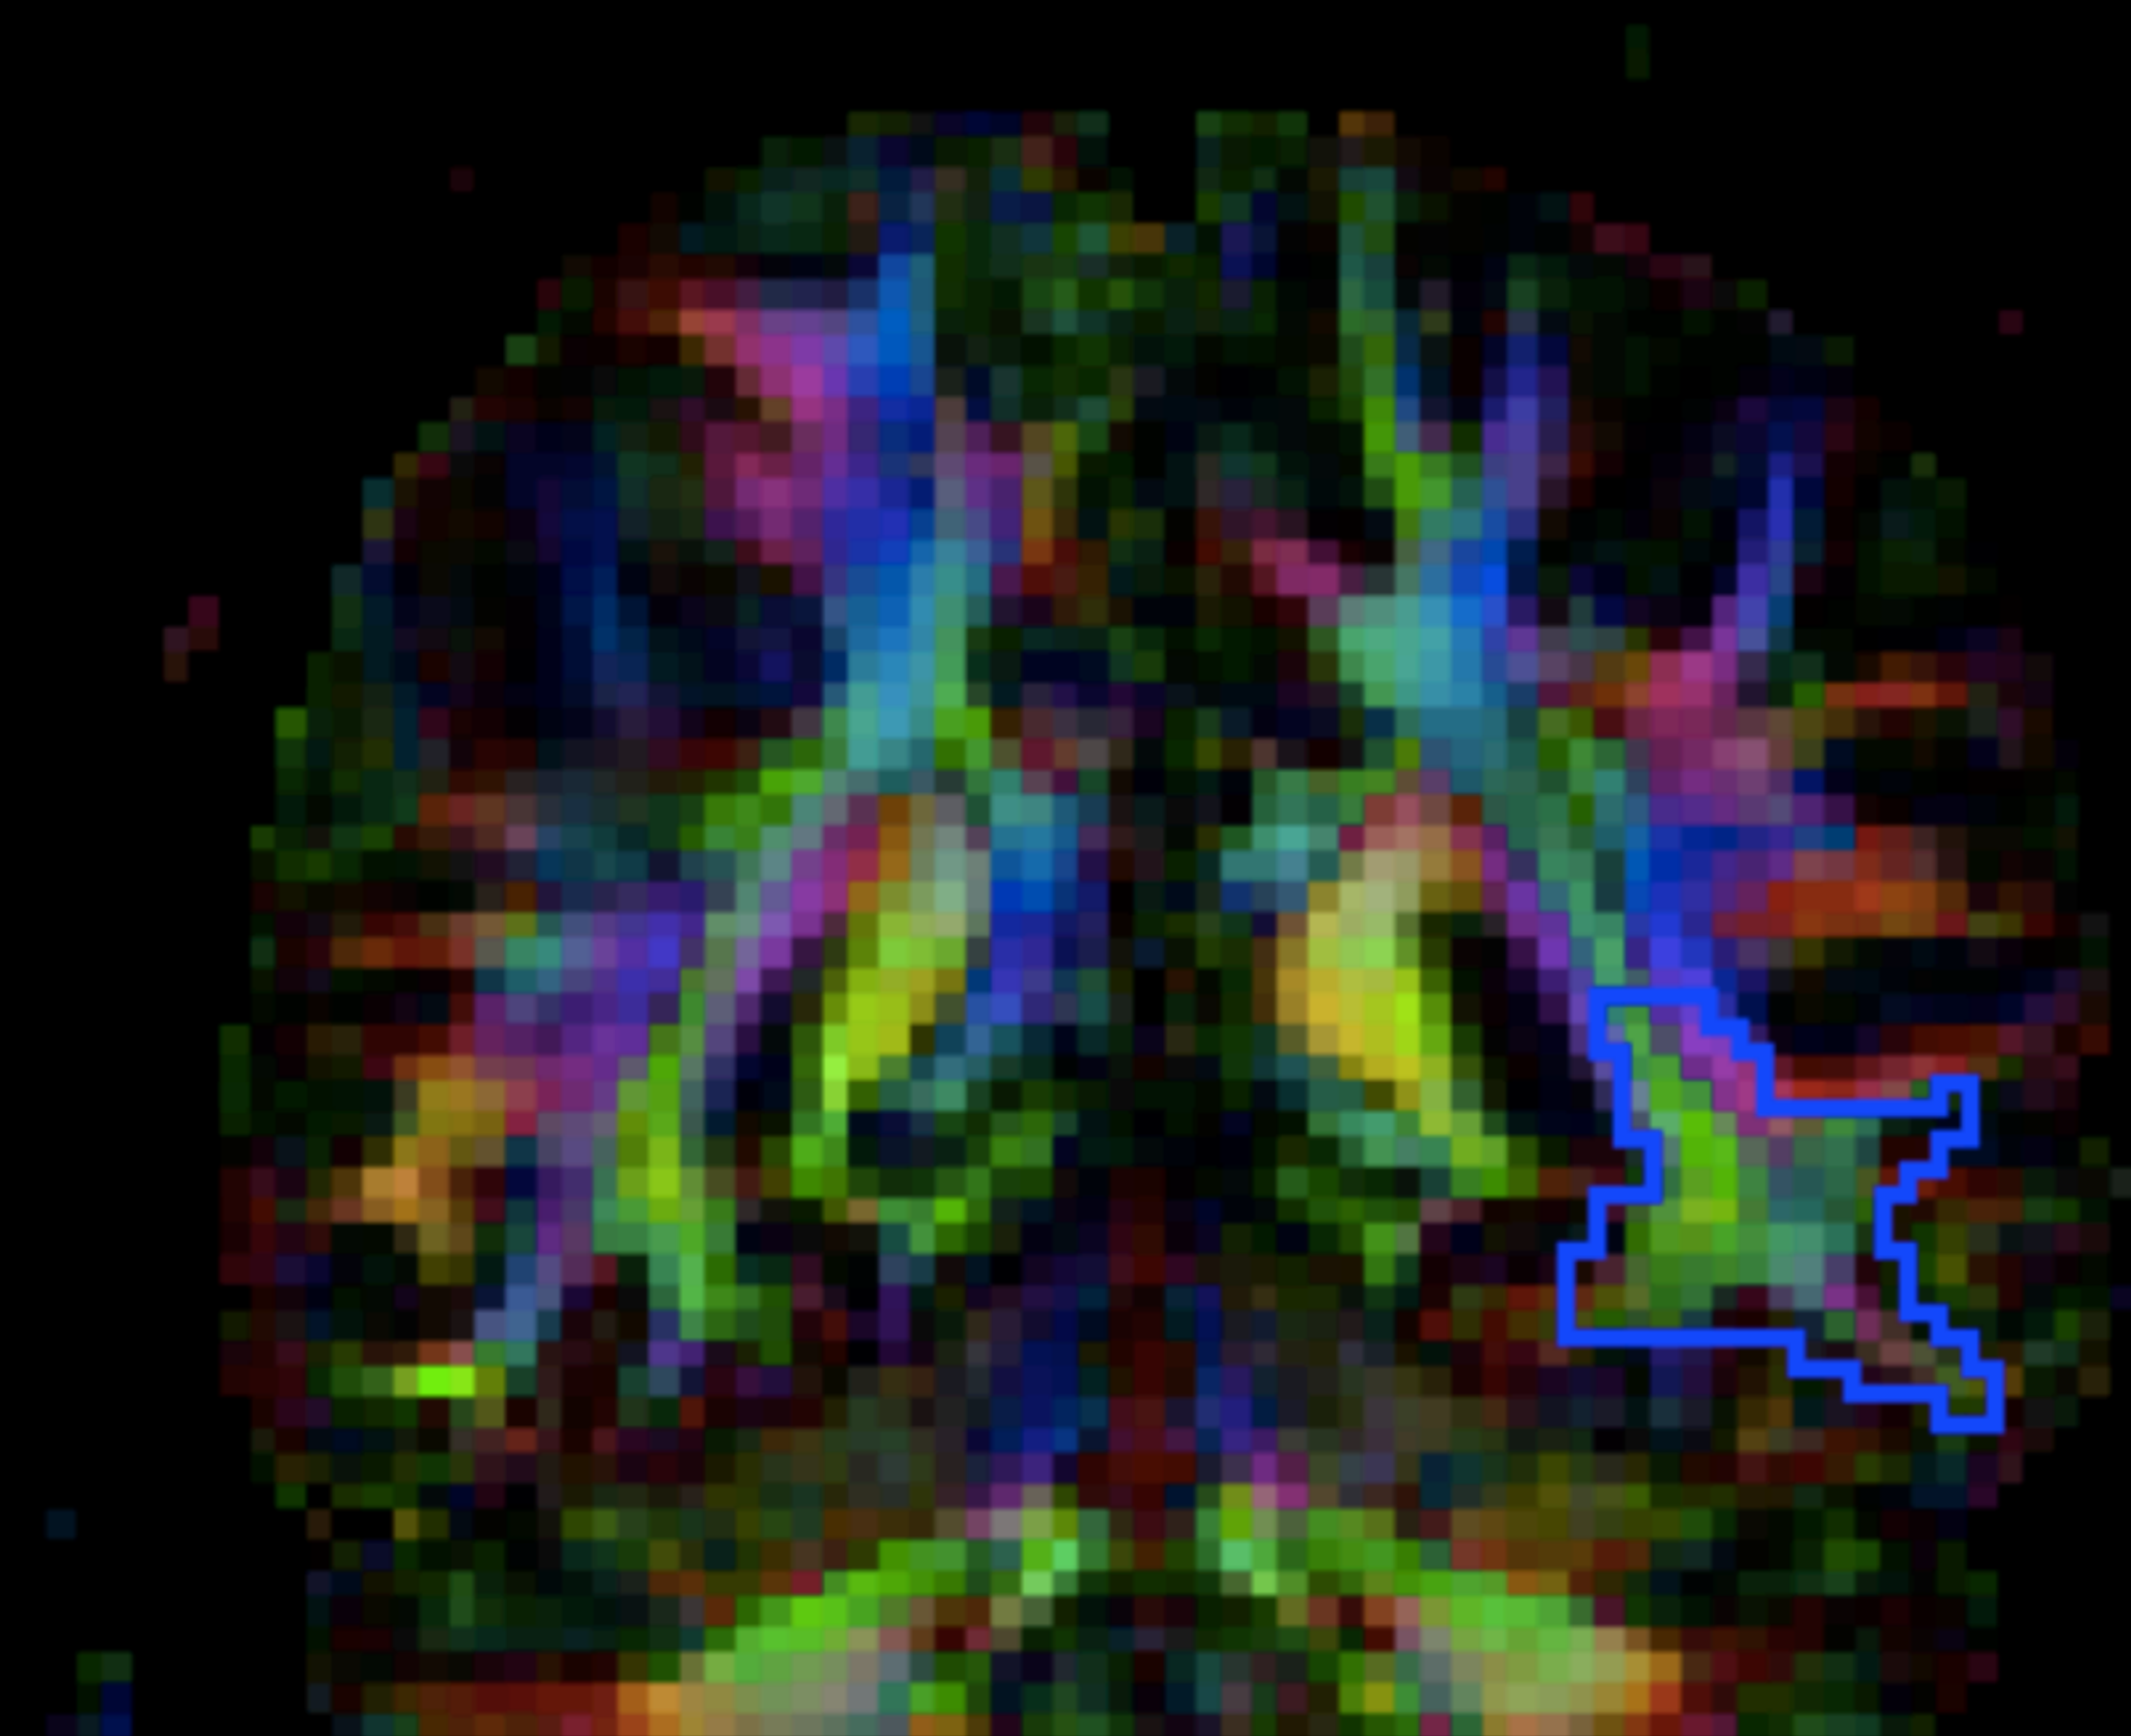

ROI 2

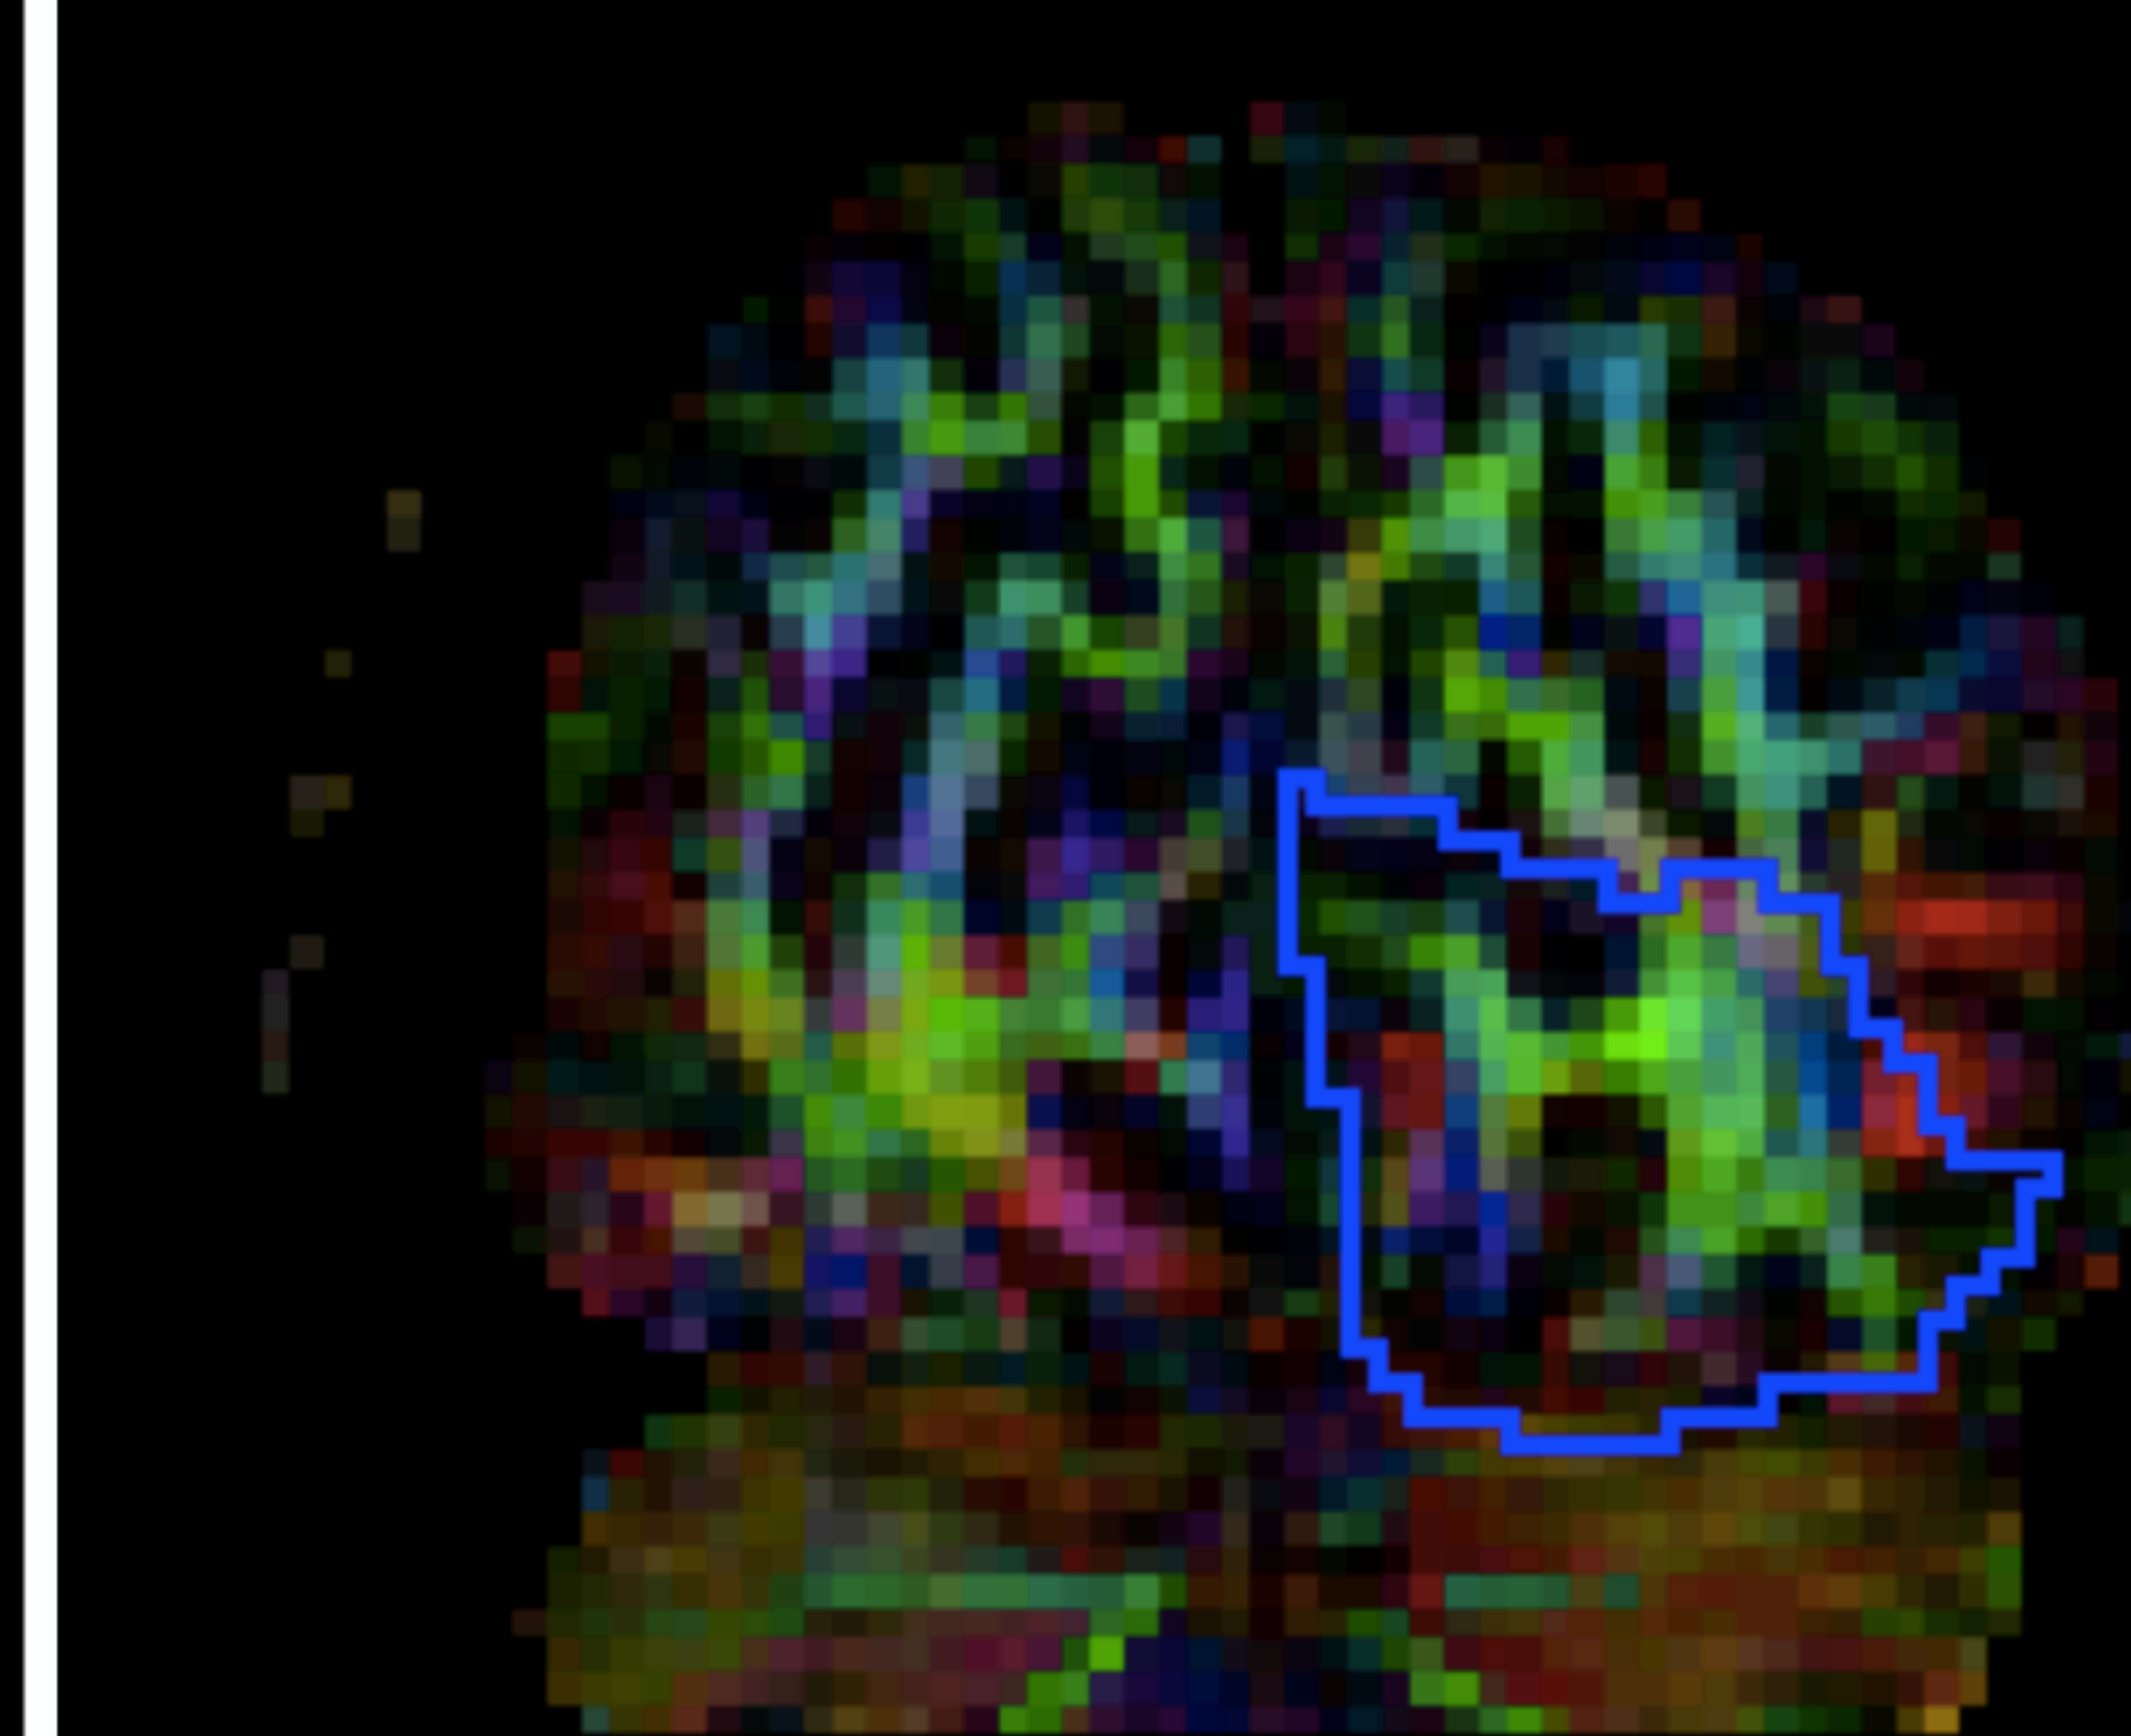

ROI 3

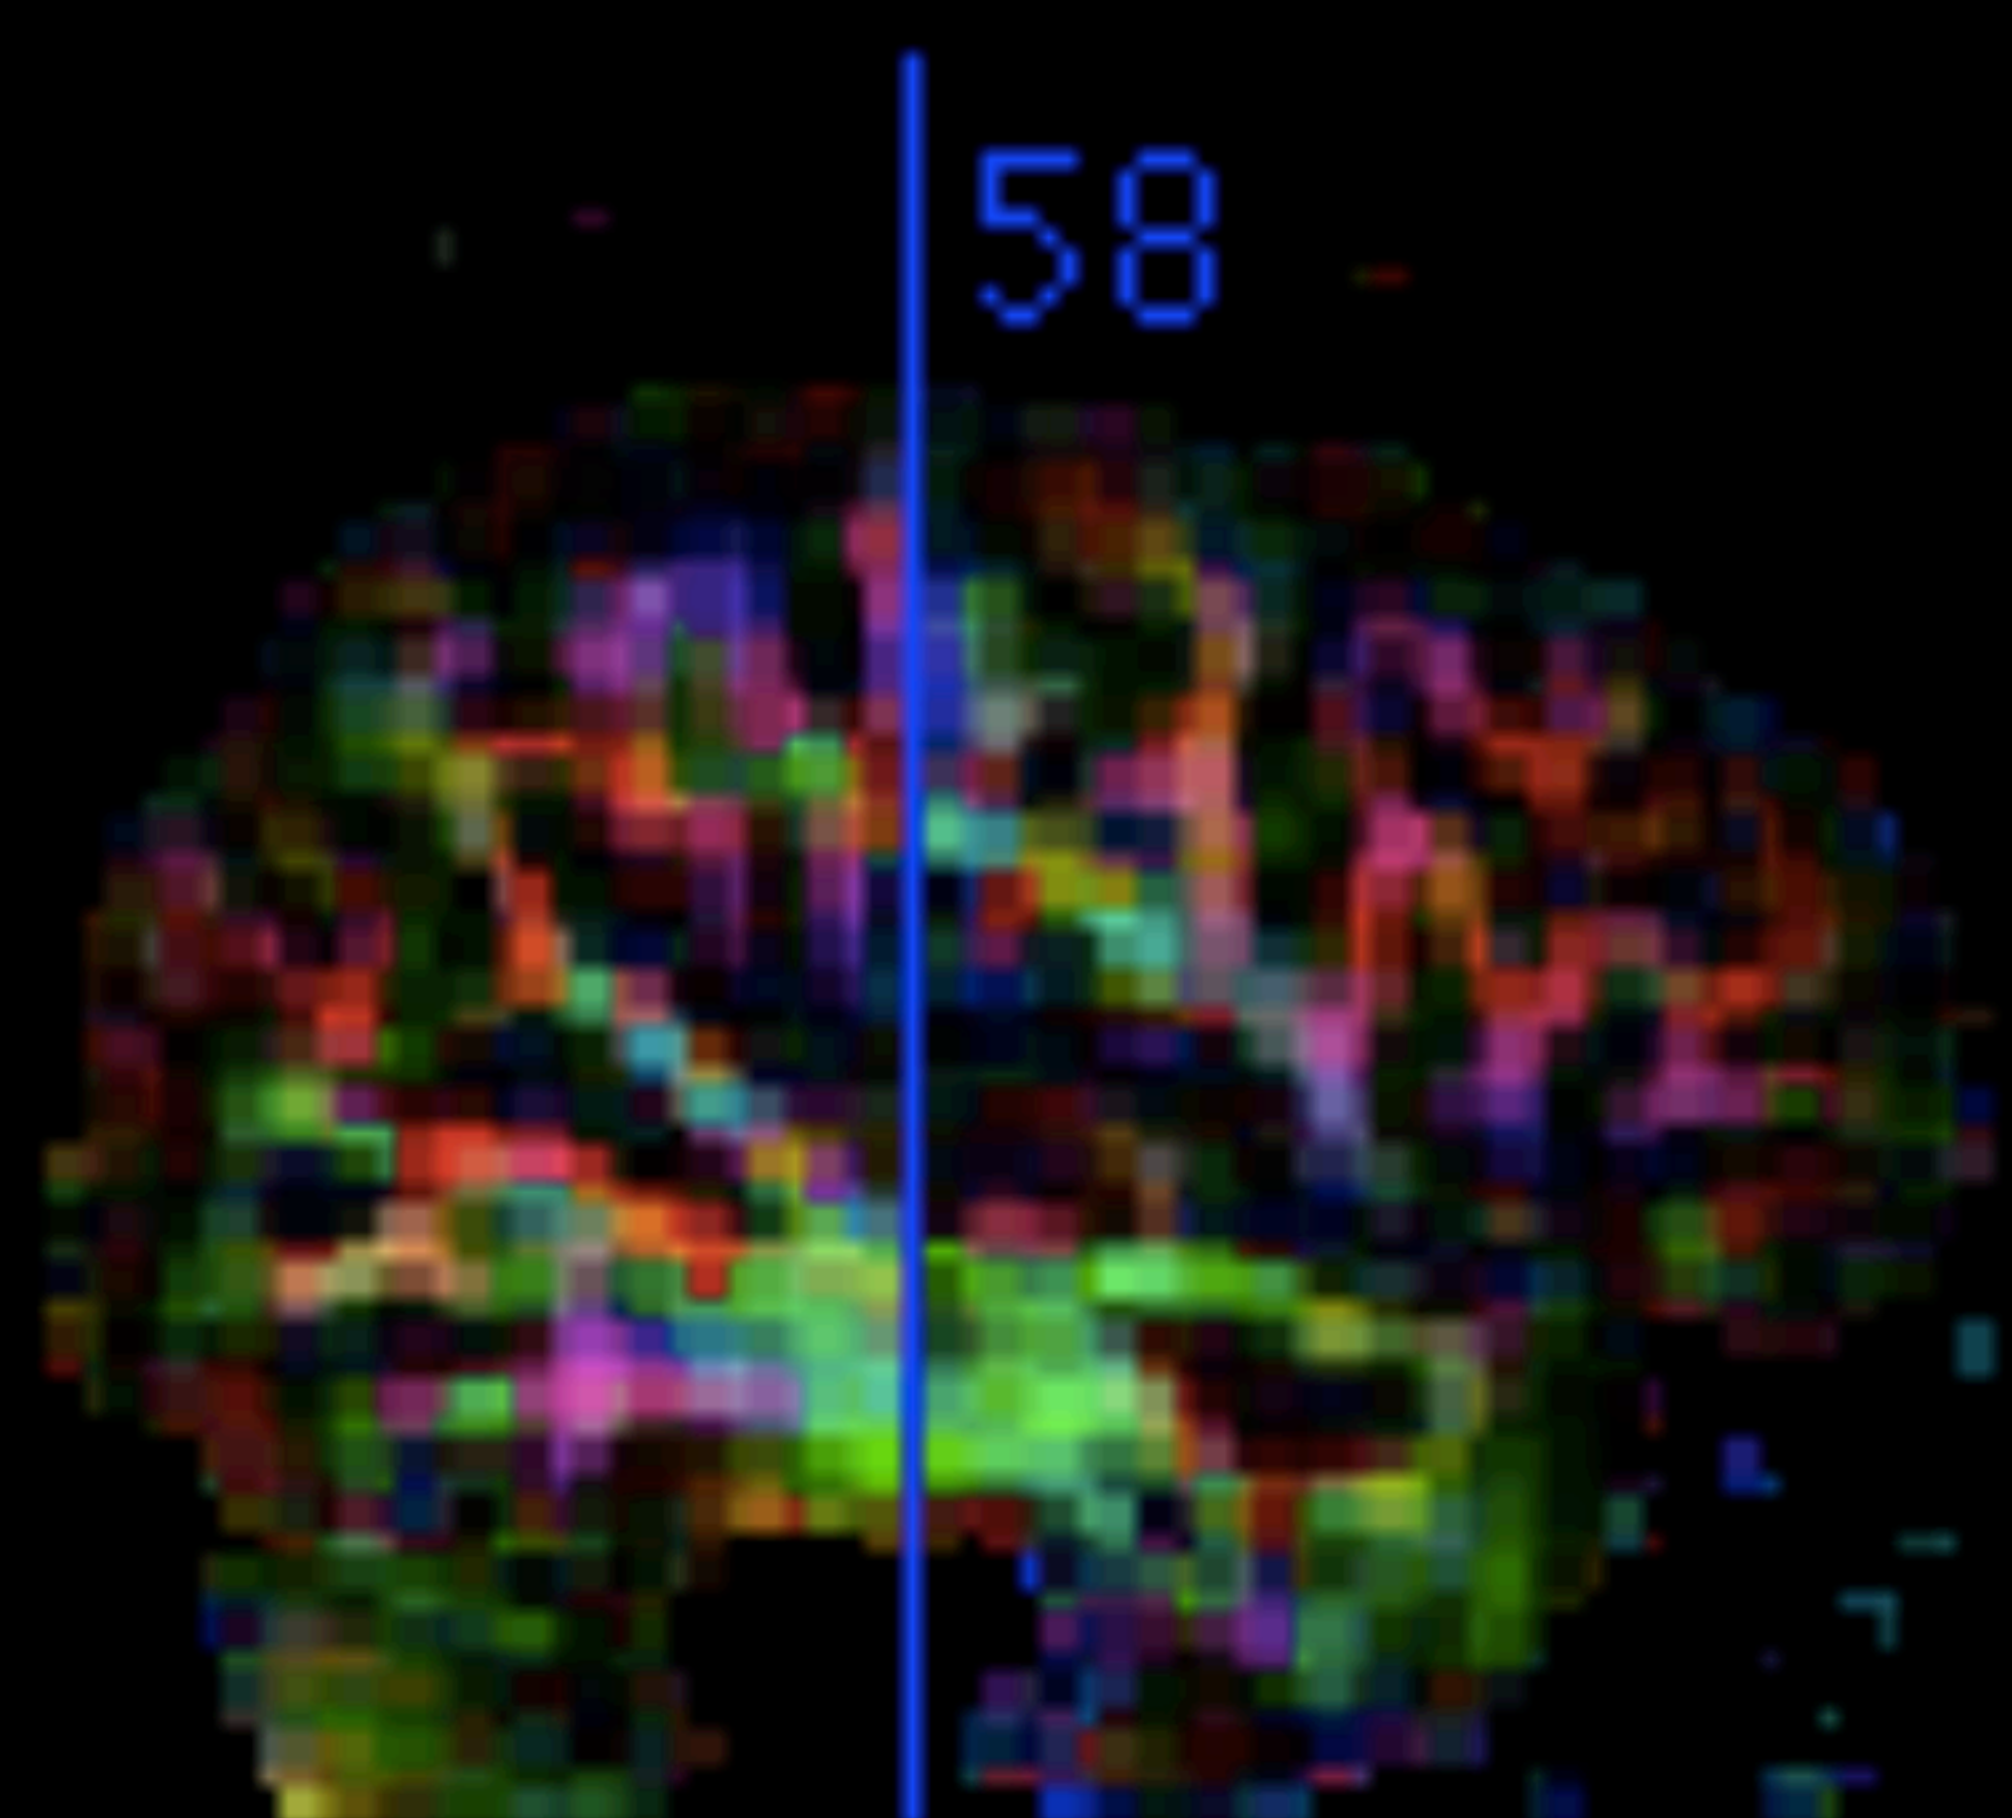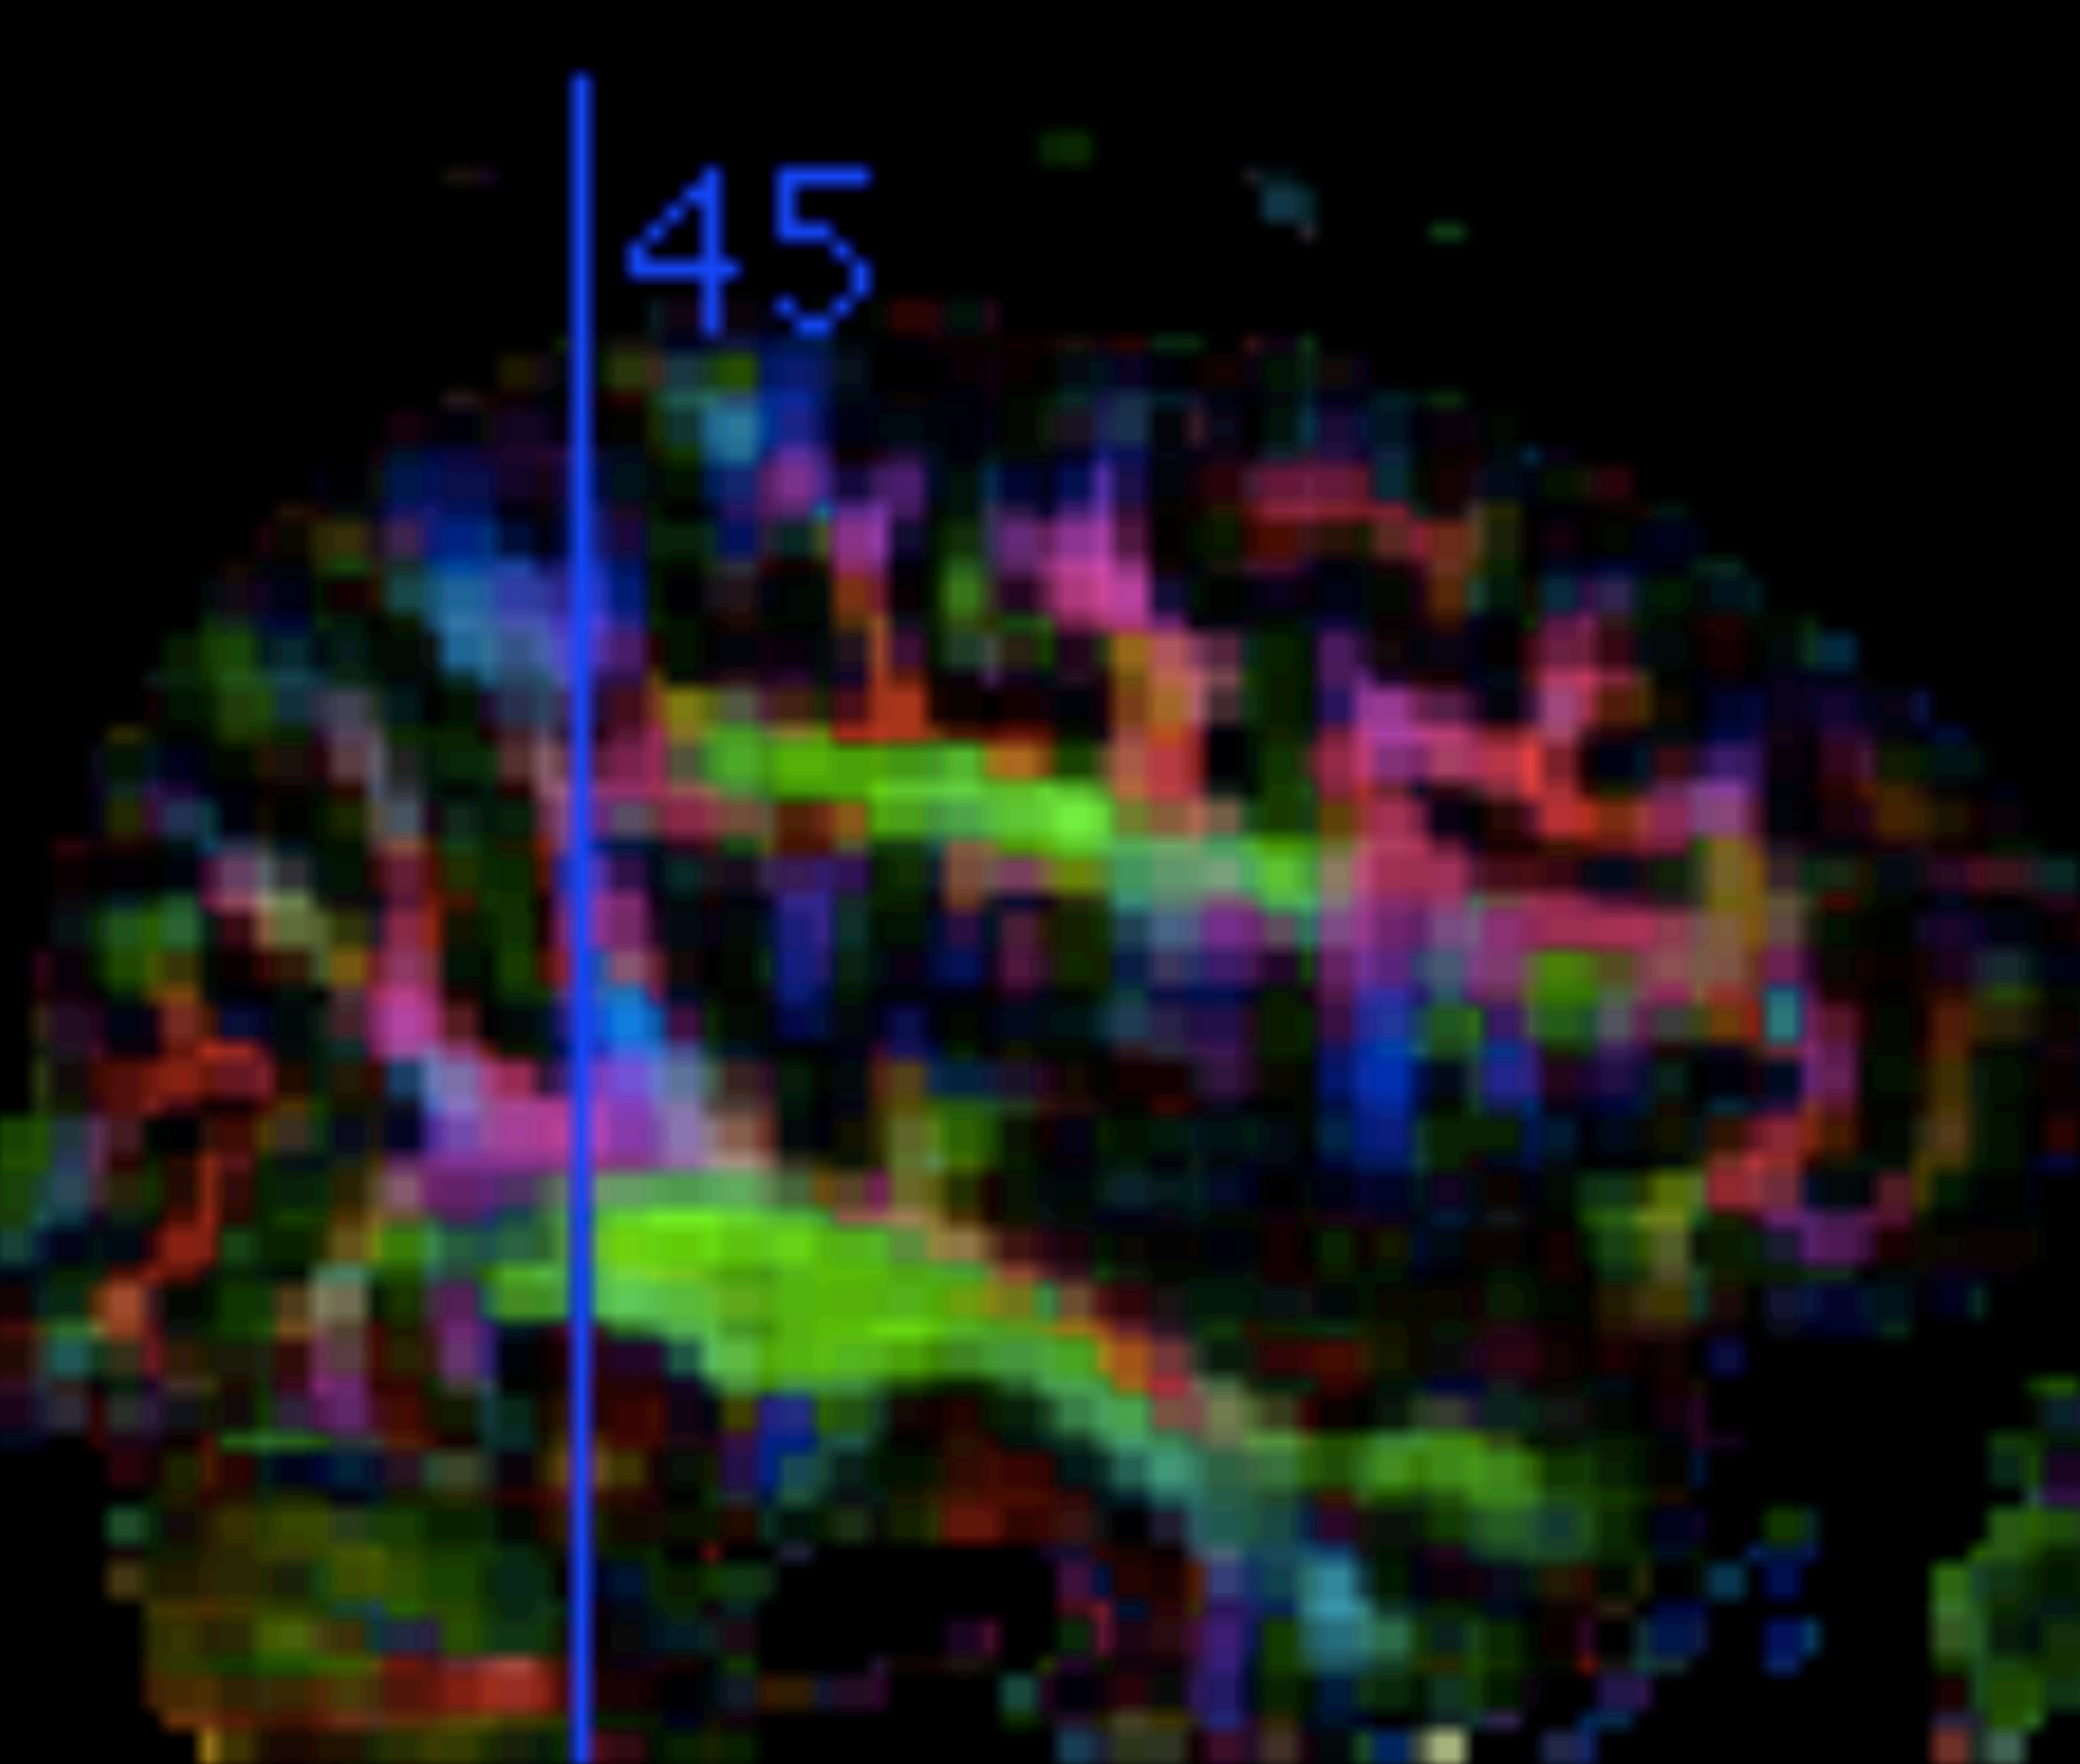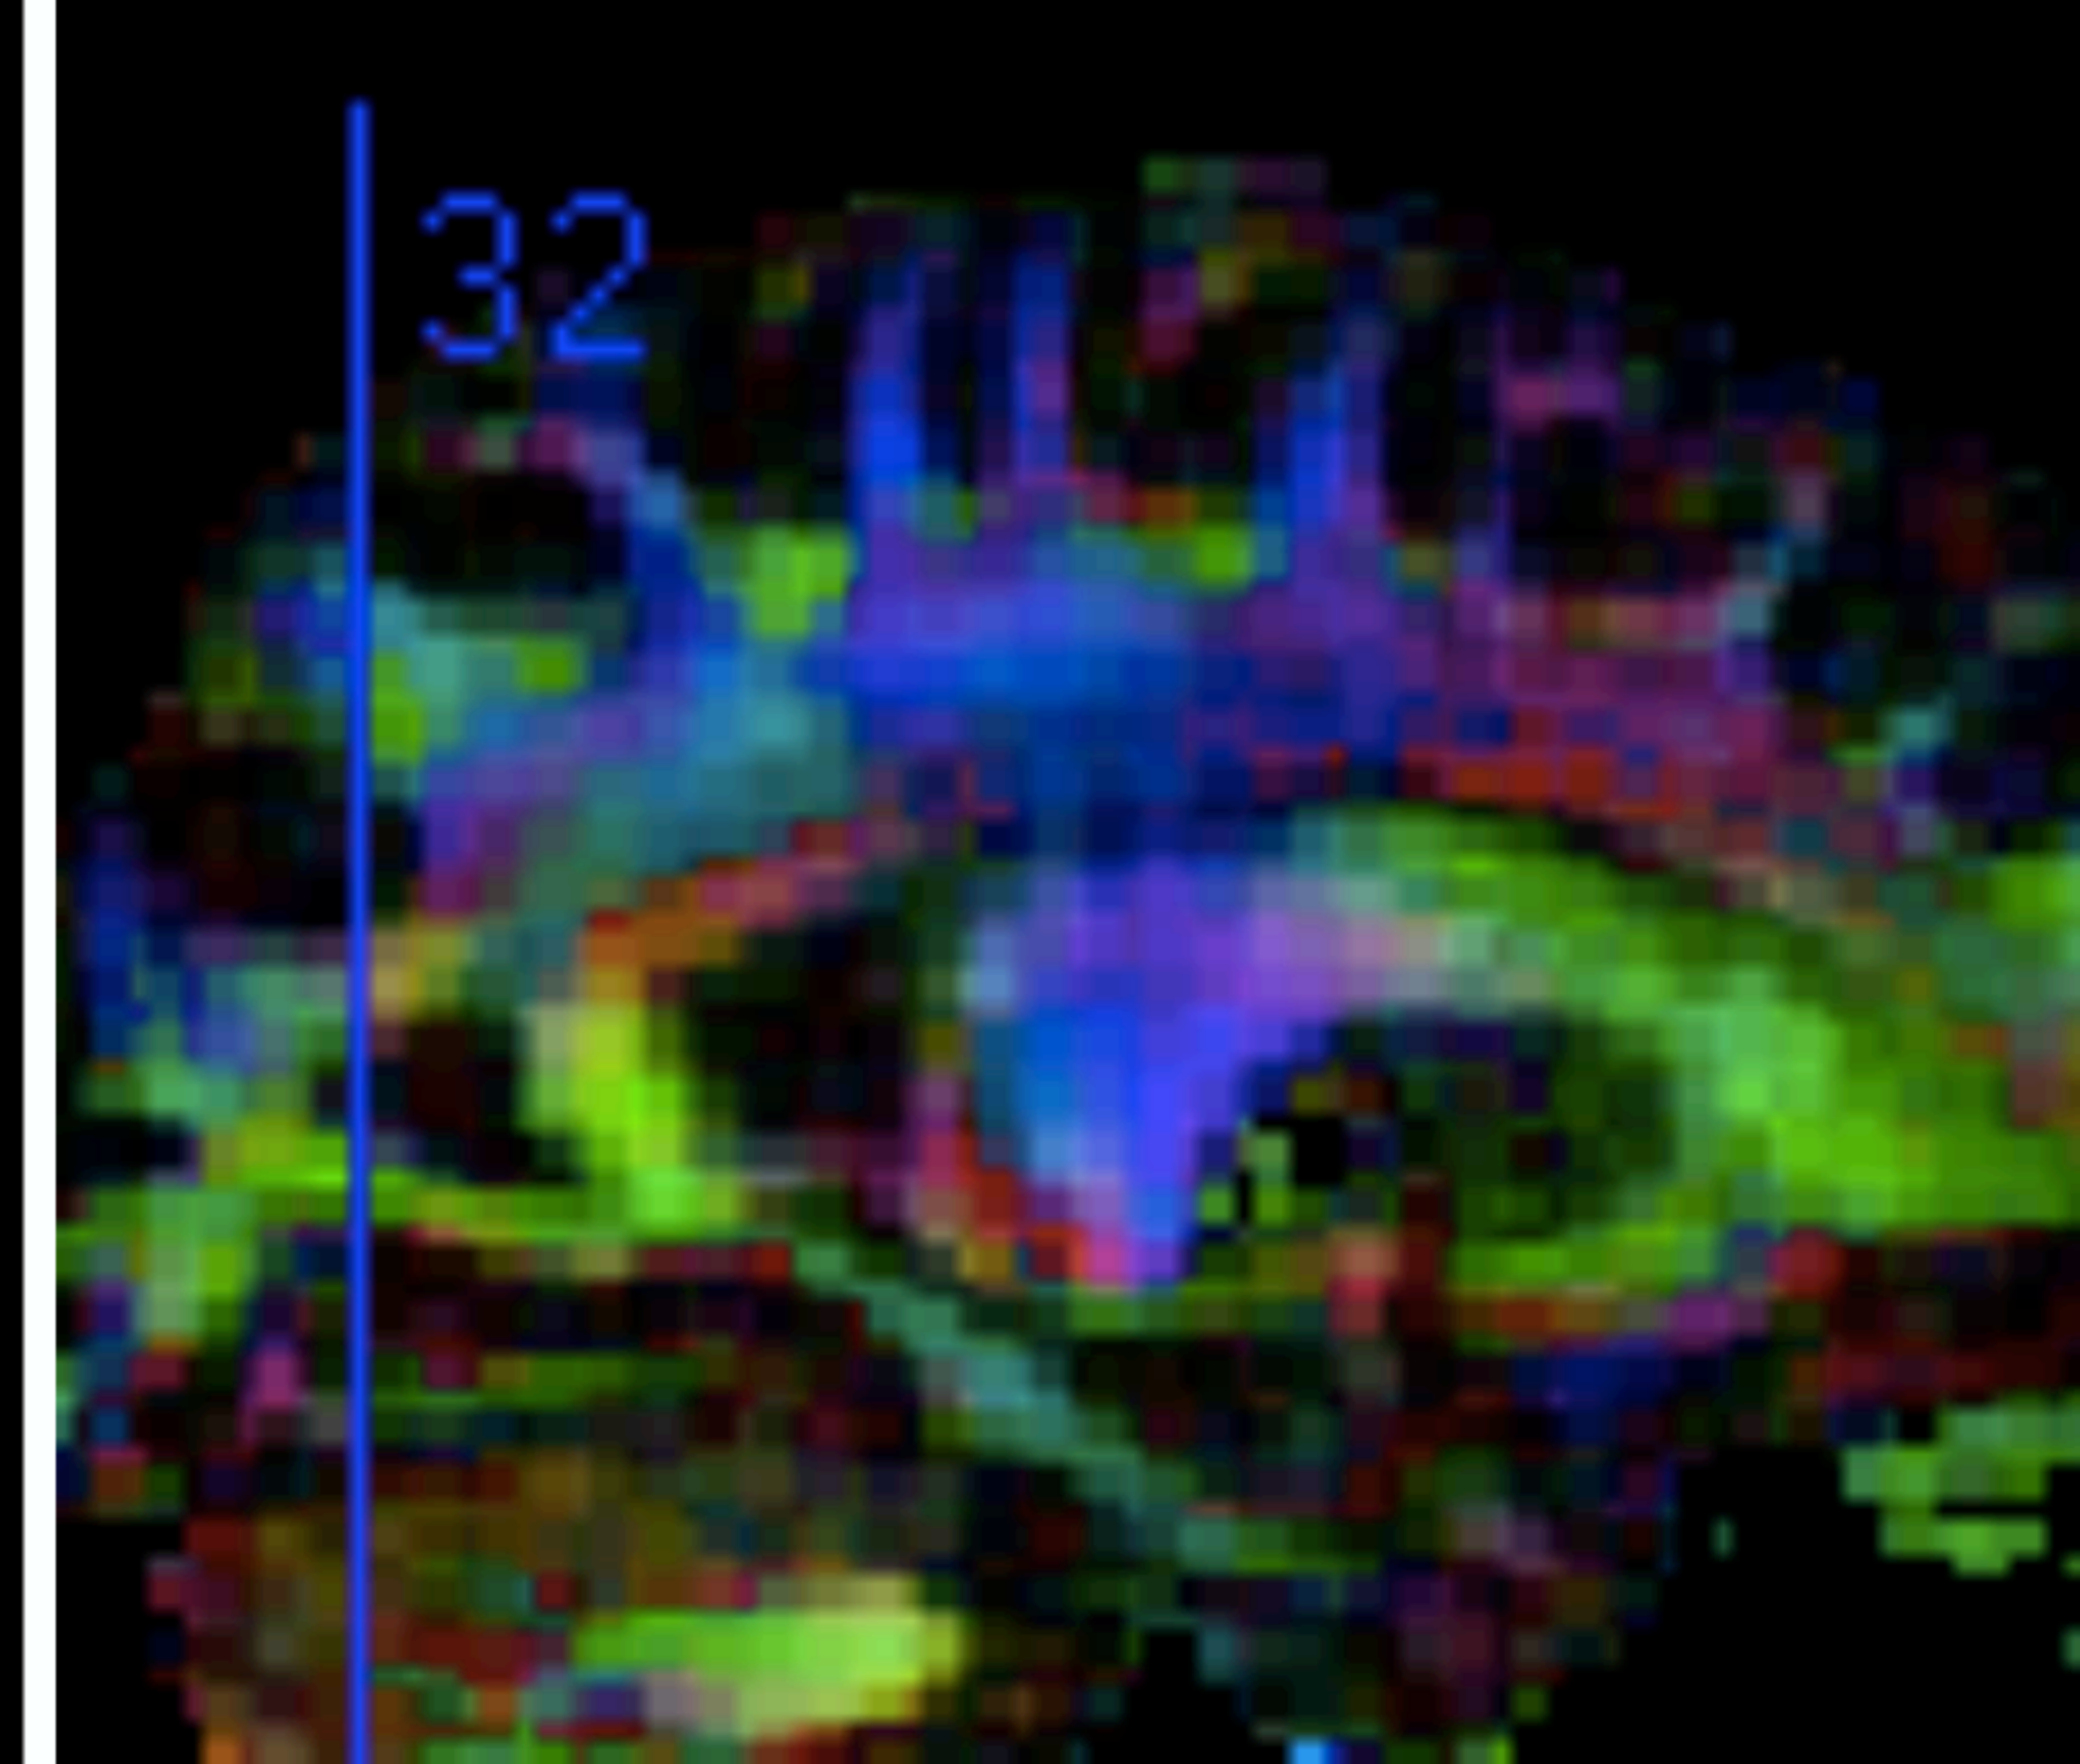

g.

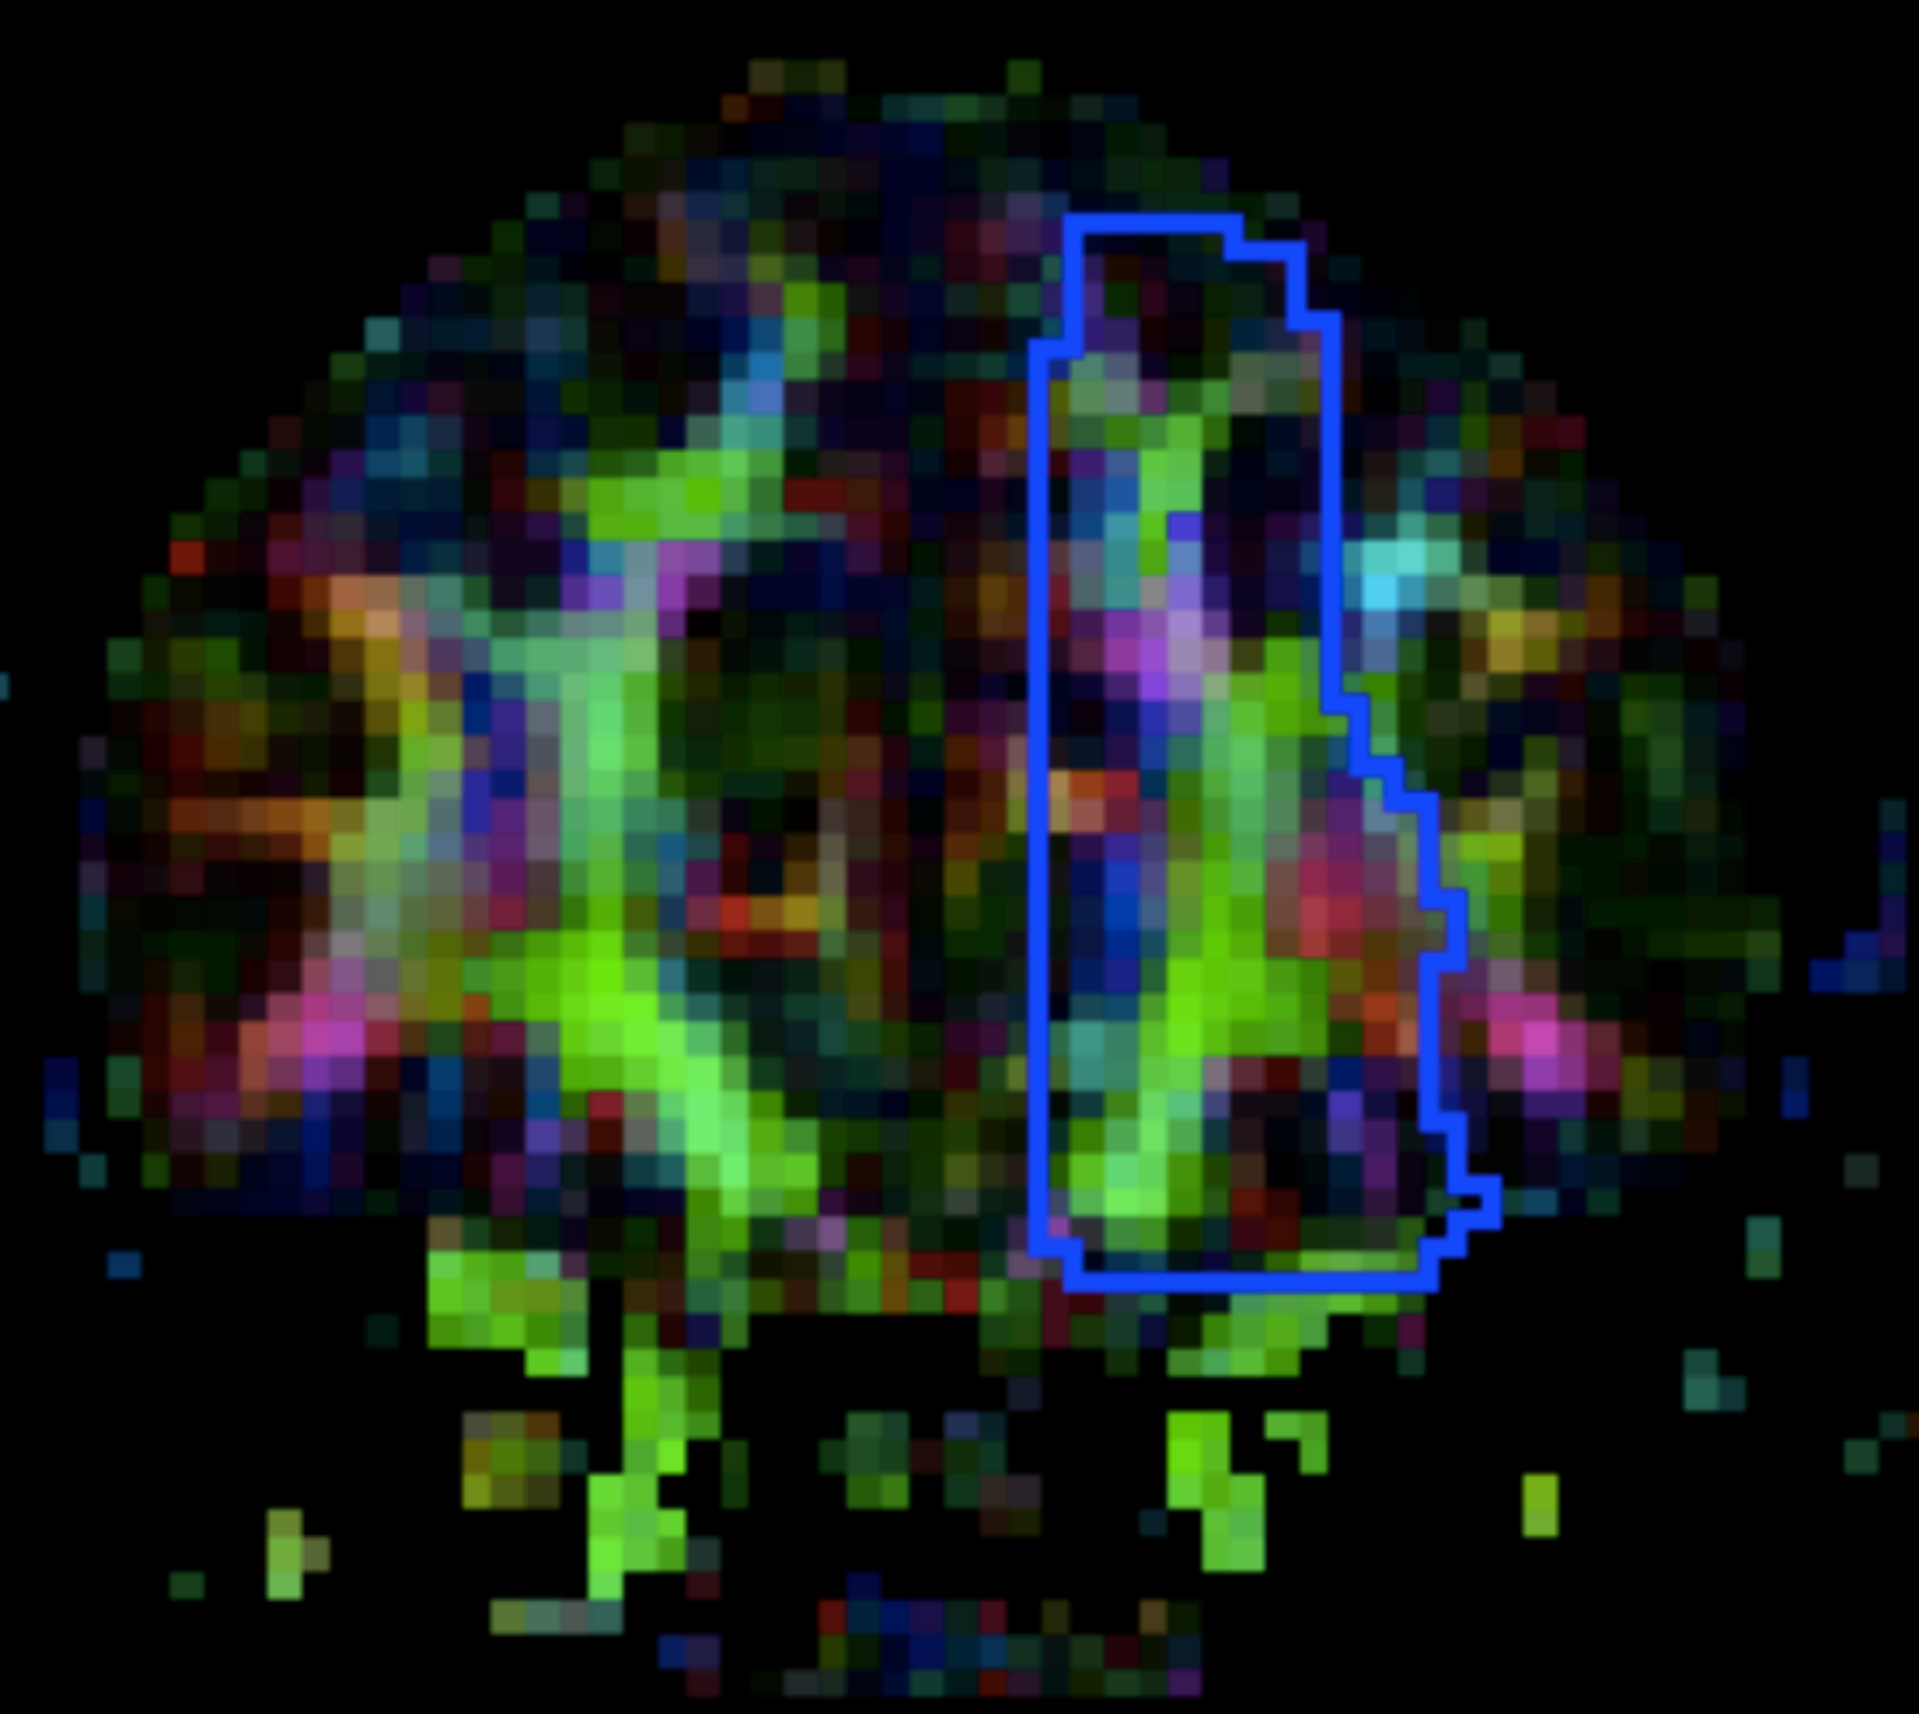

ROI 1

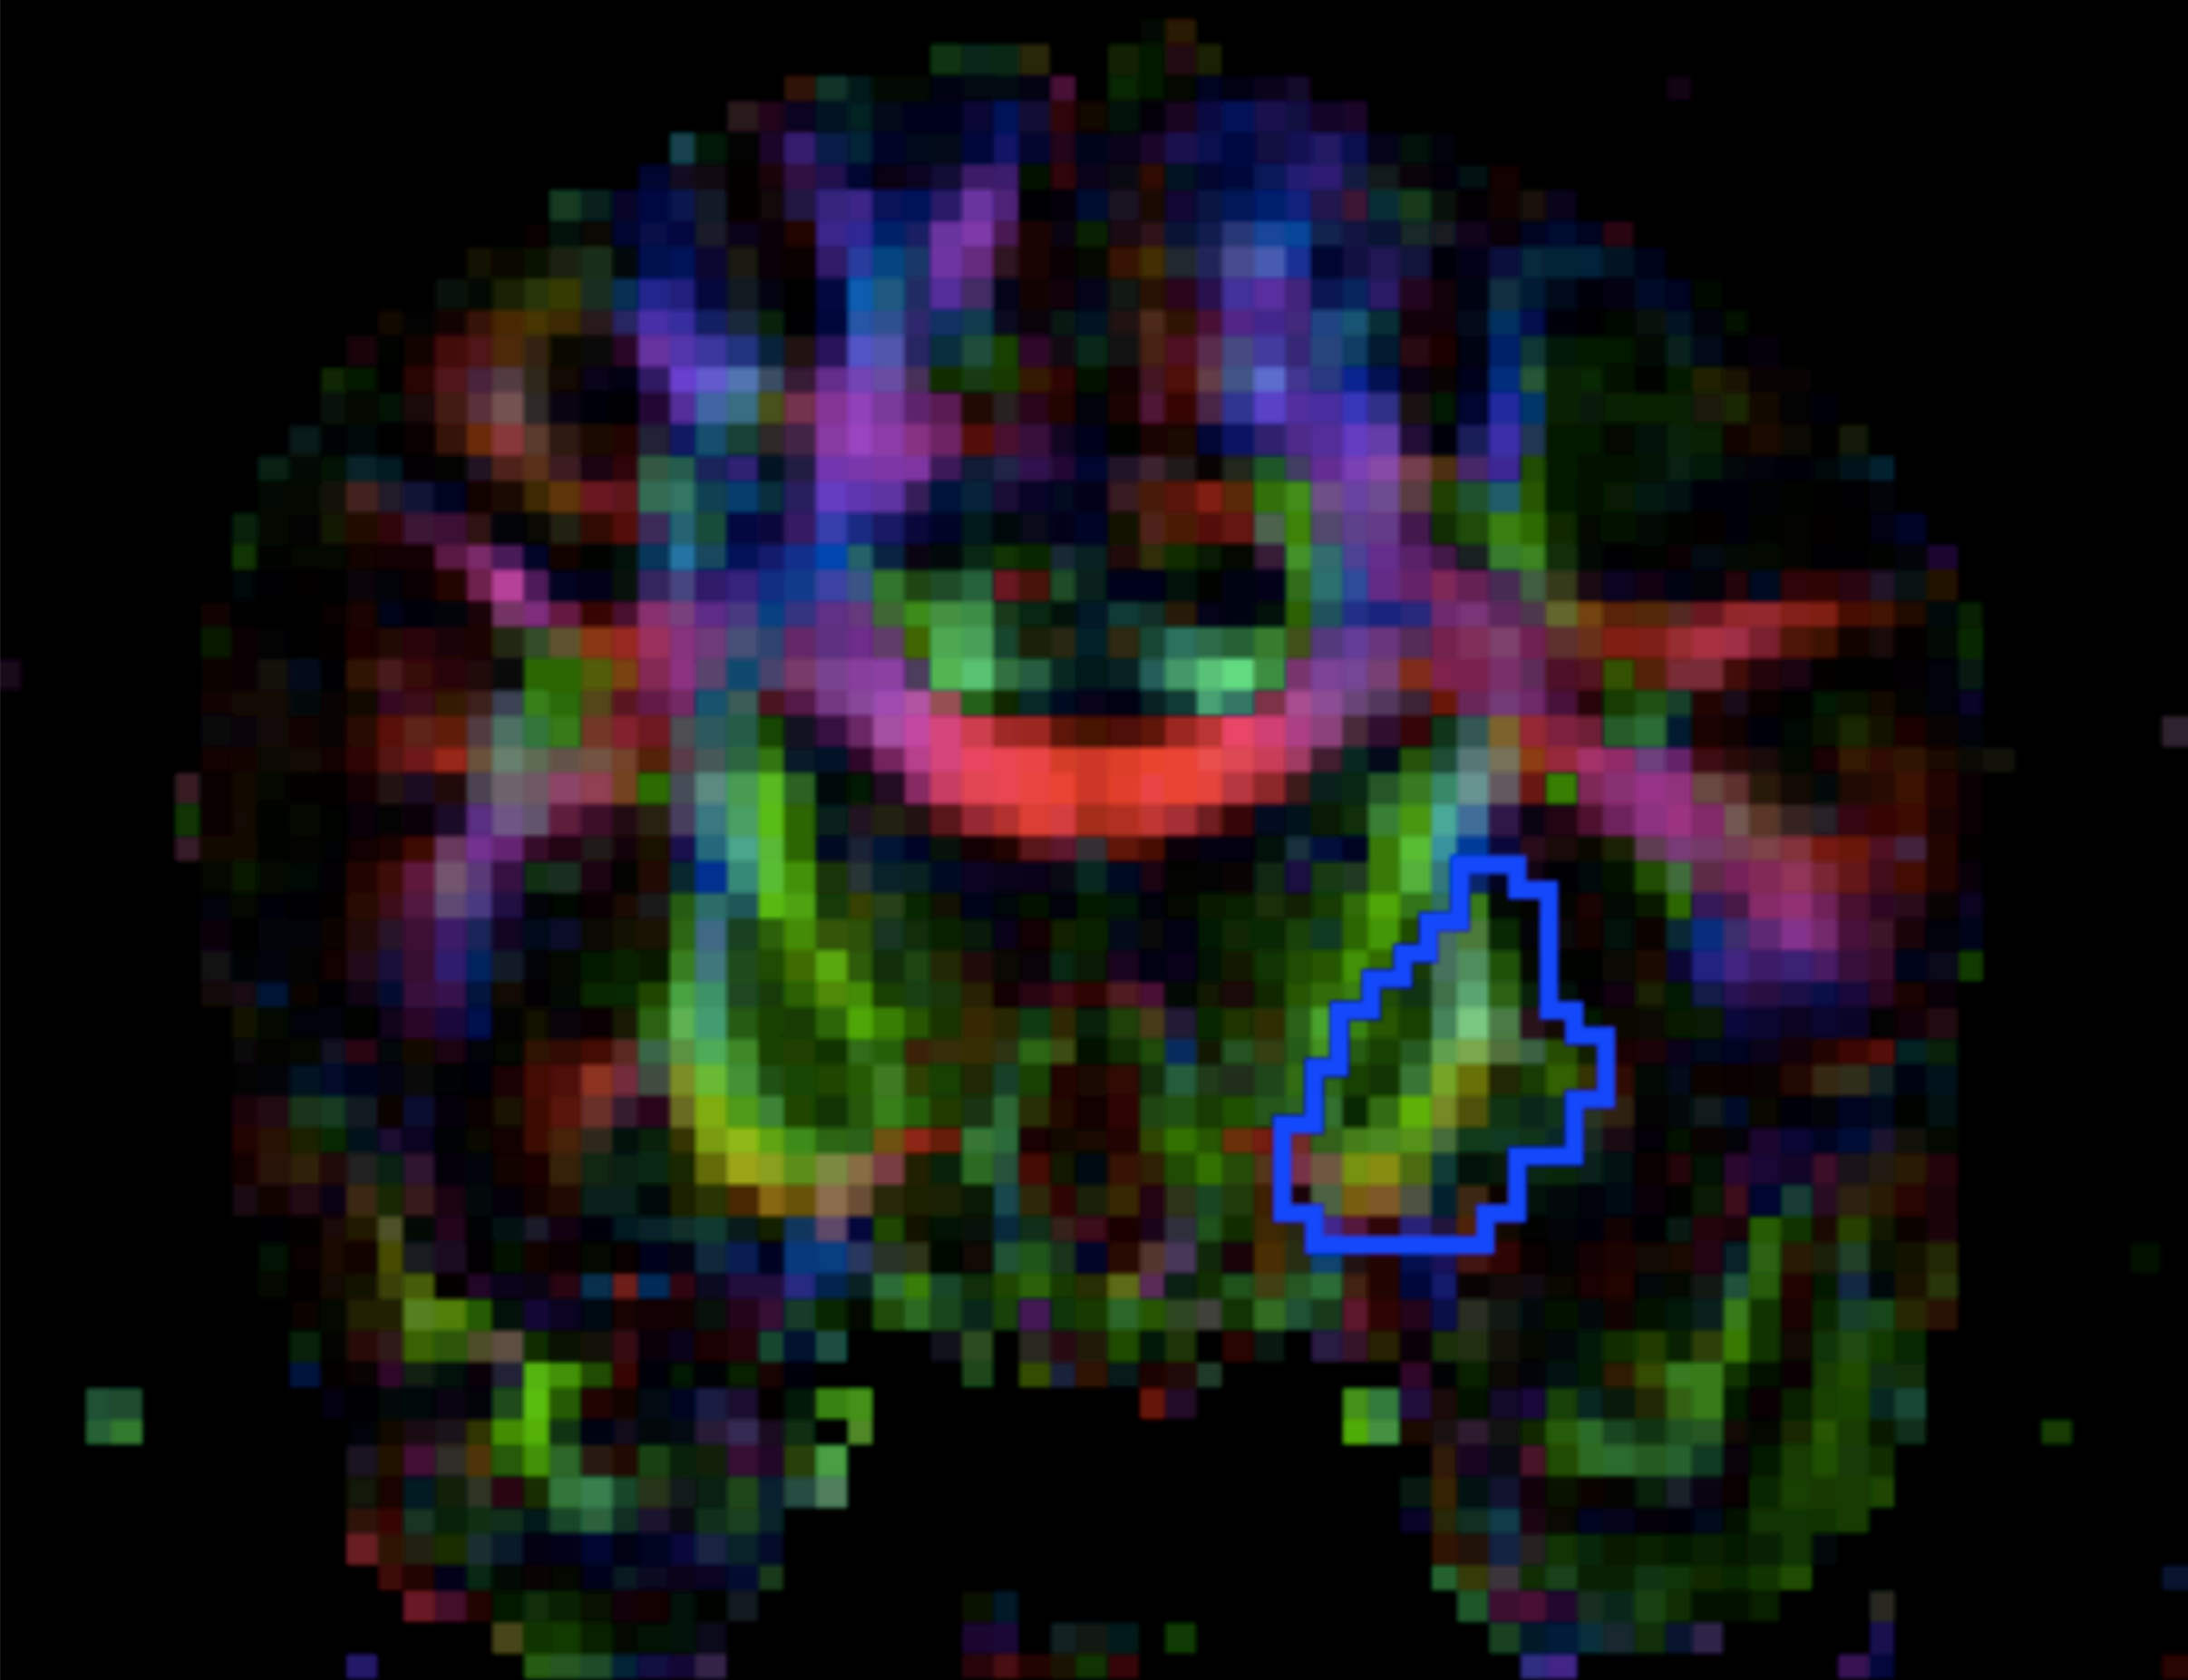

ROI 2

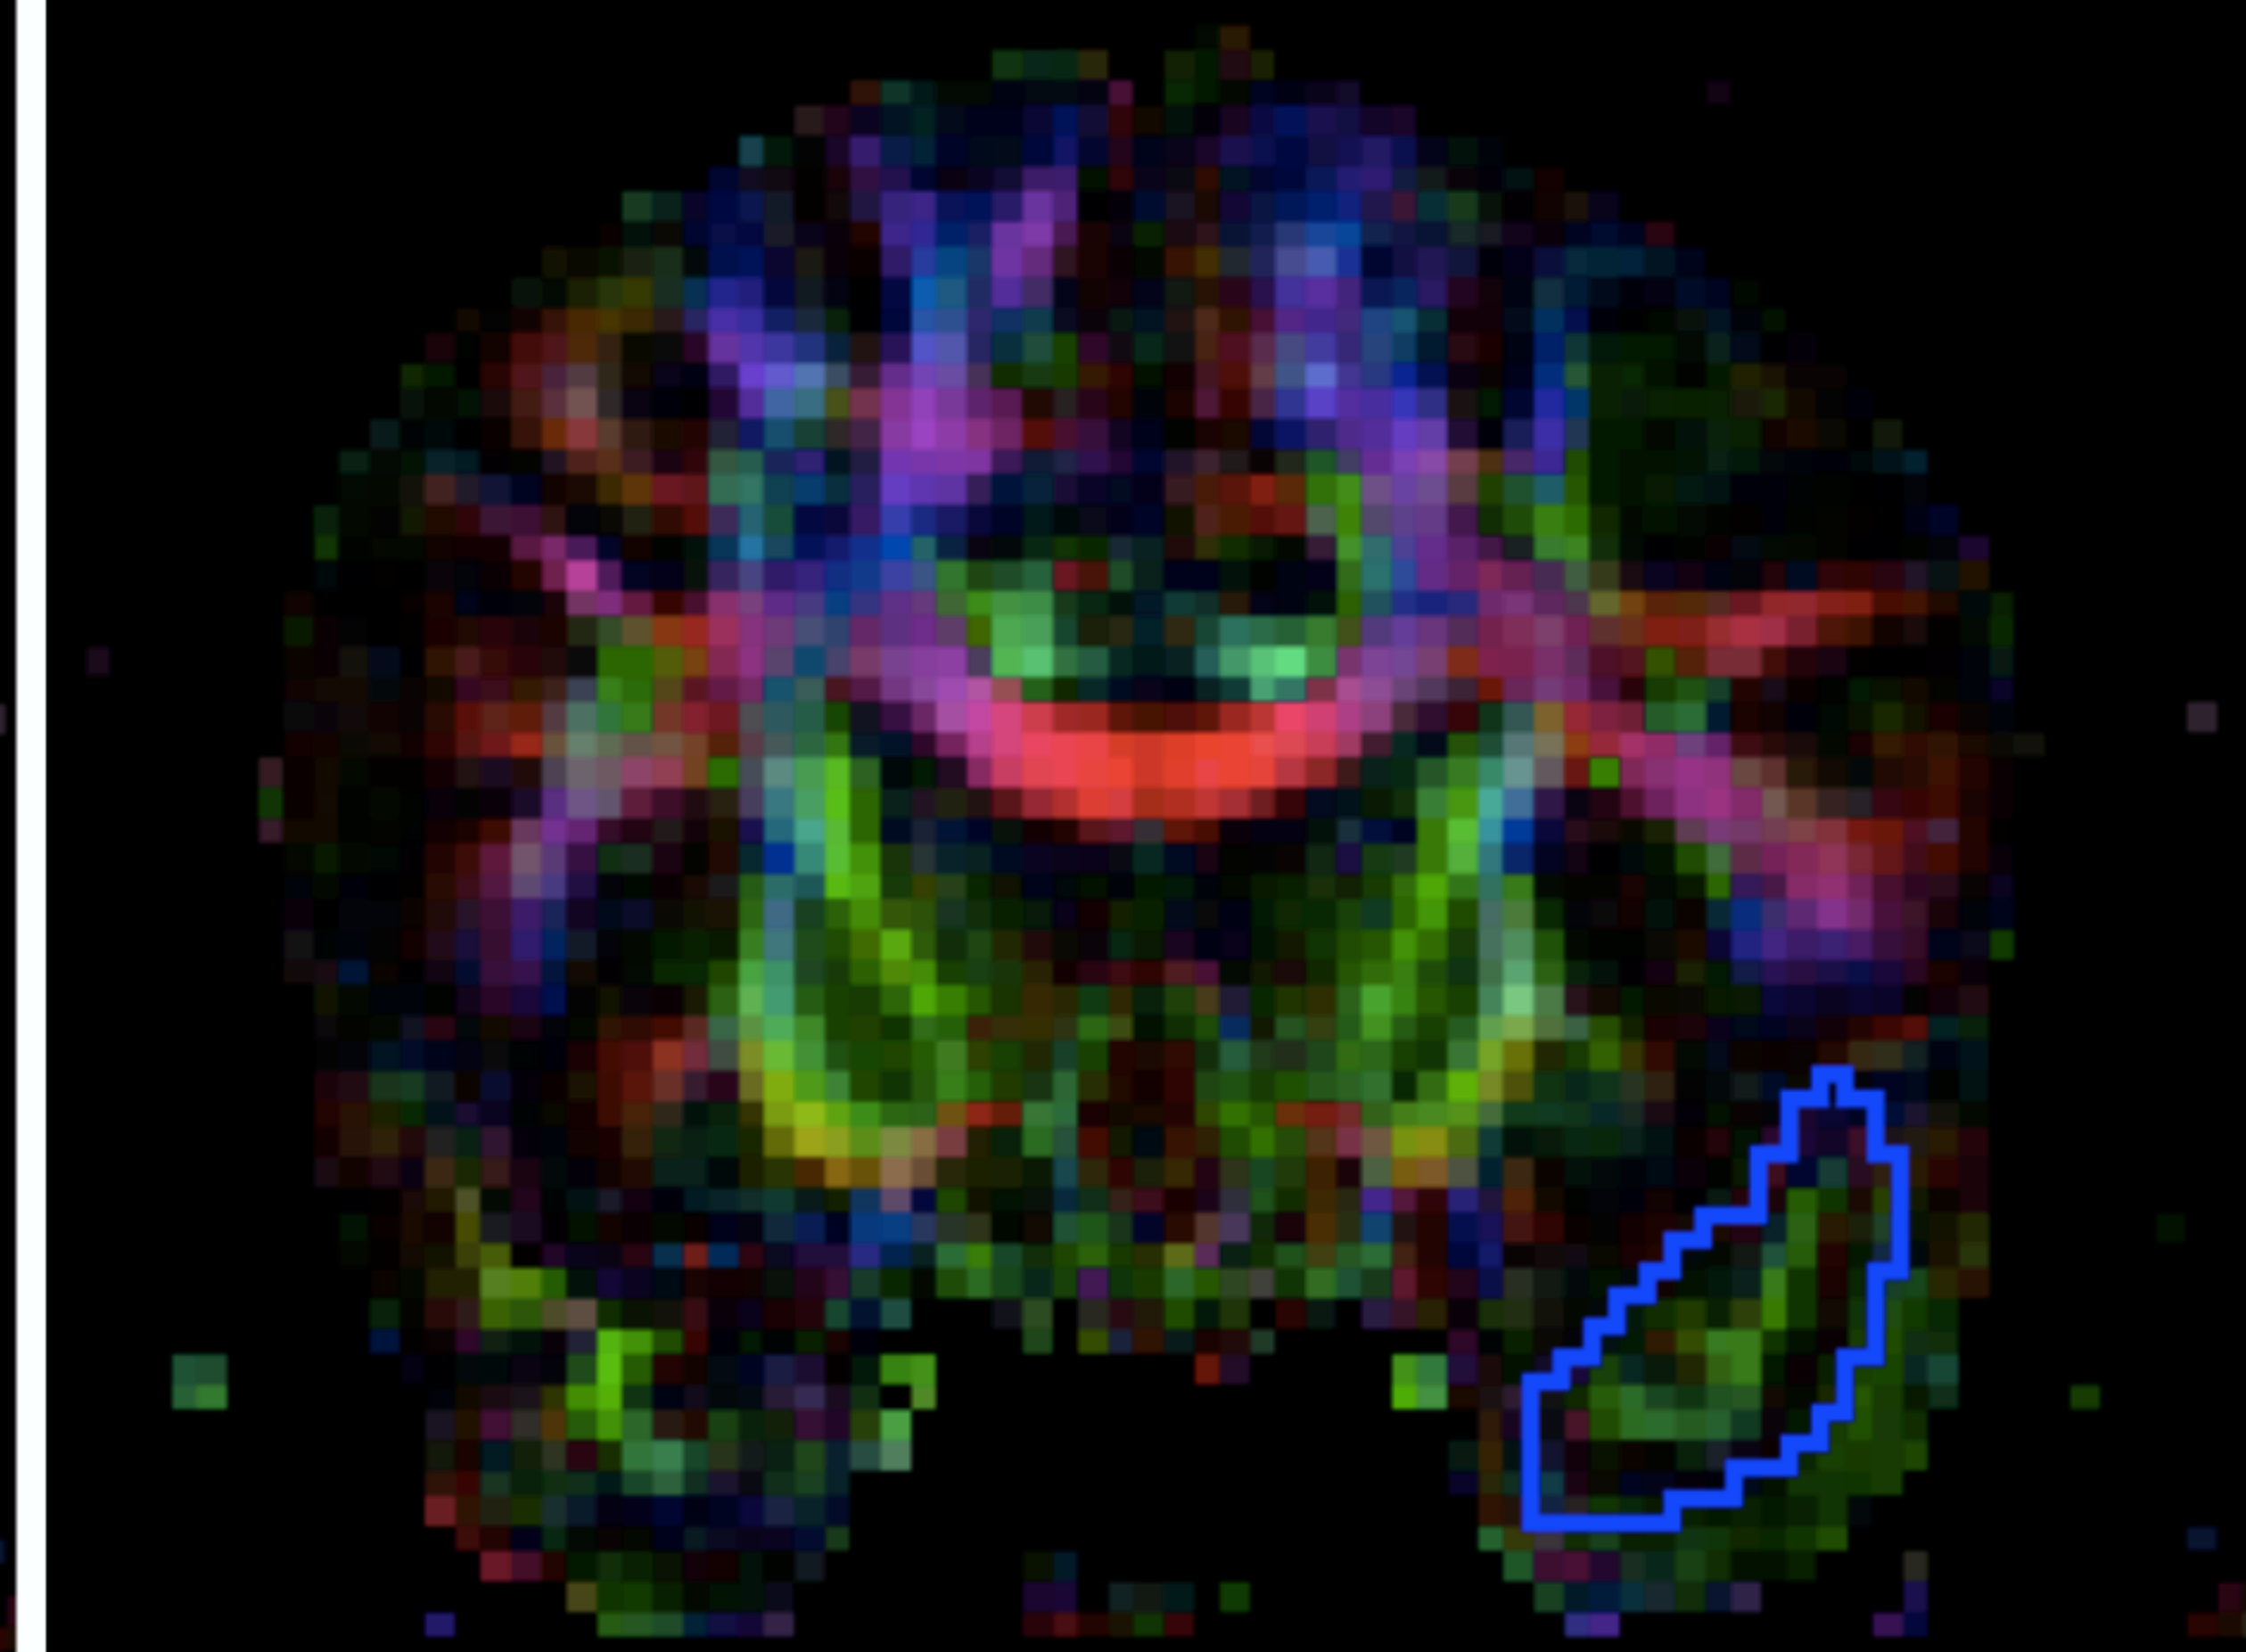

ROI 3

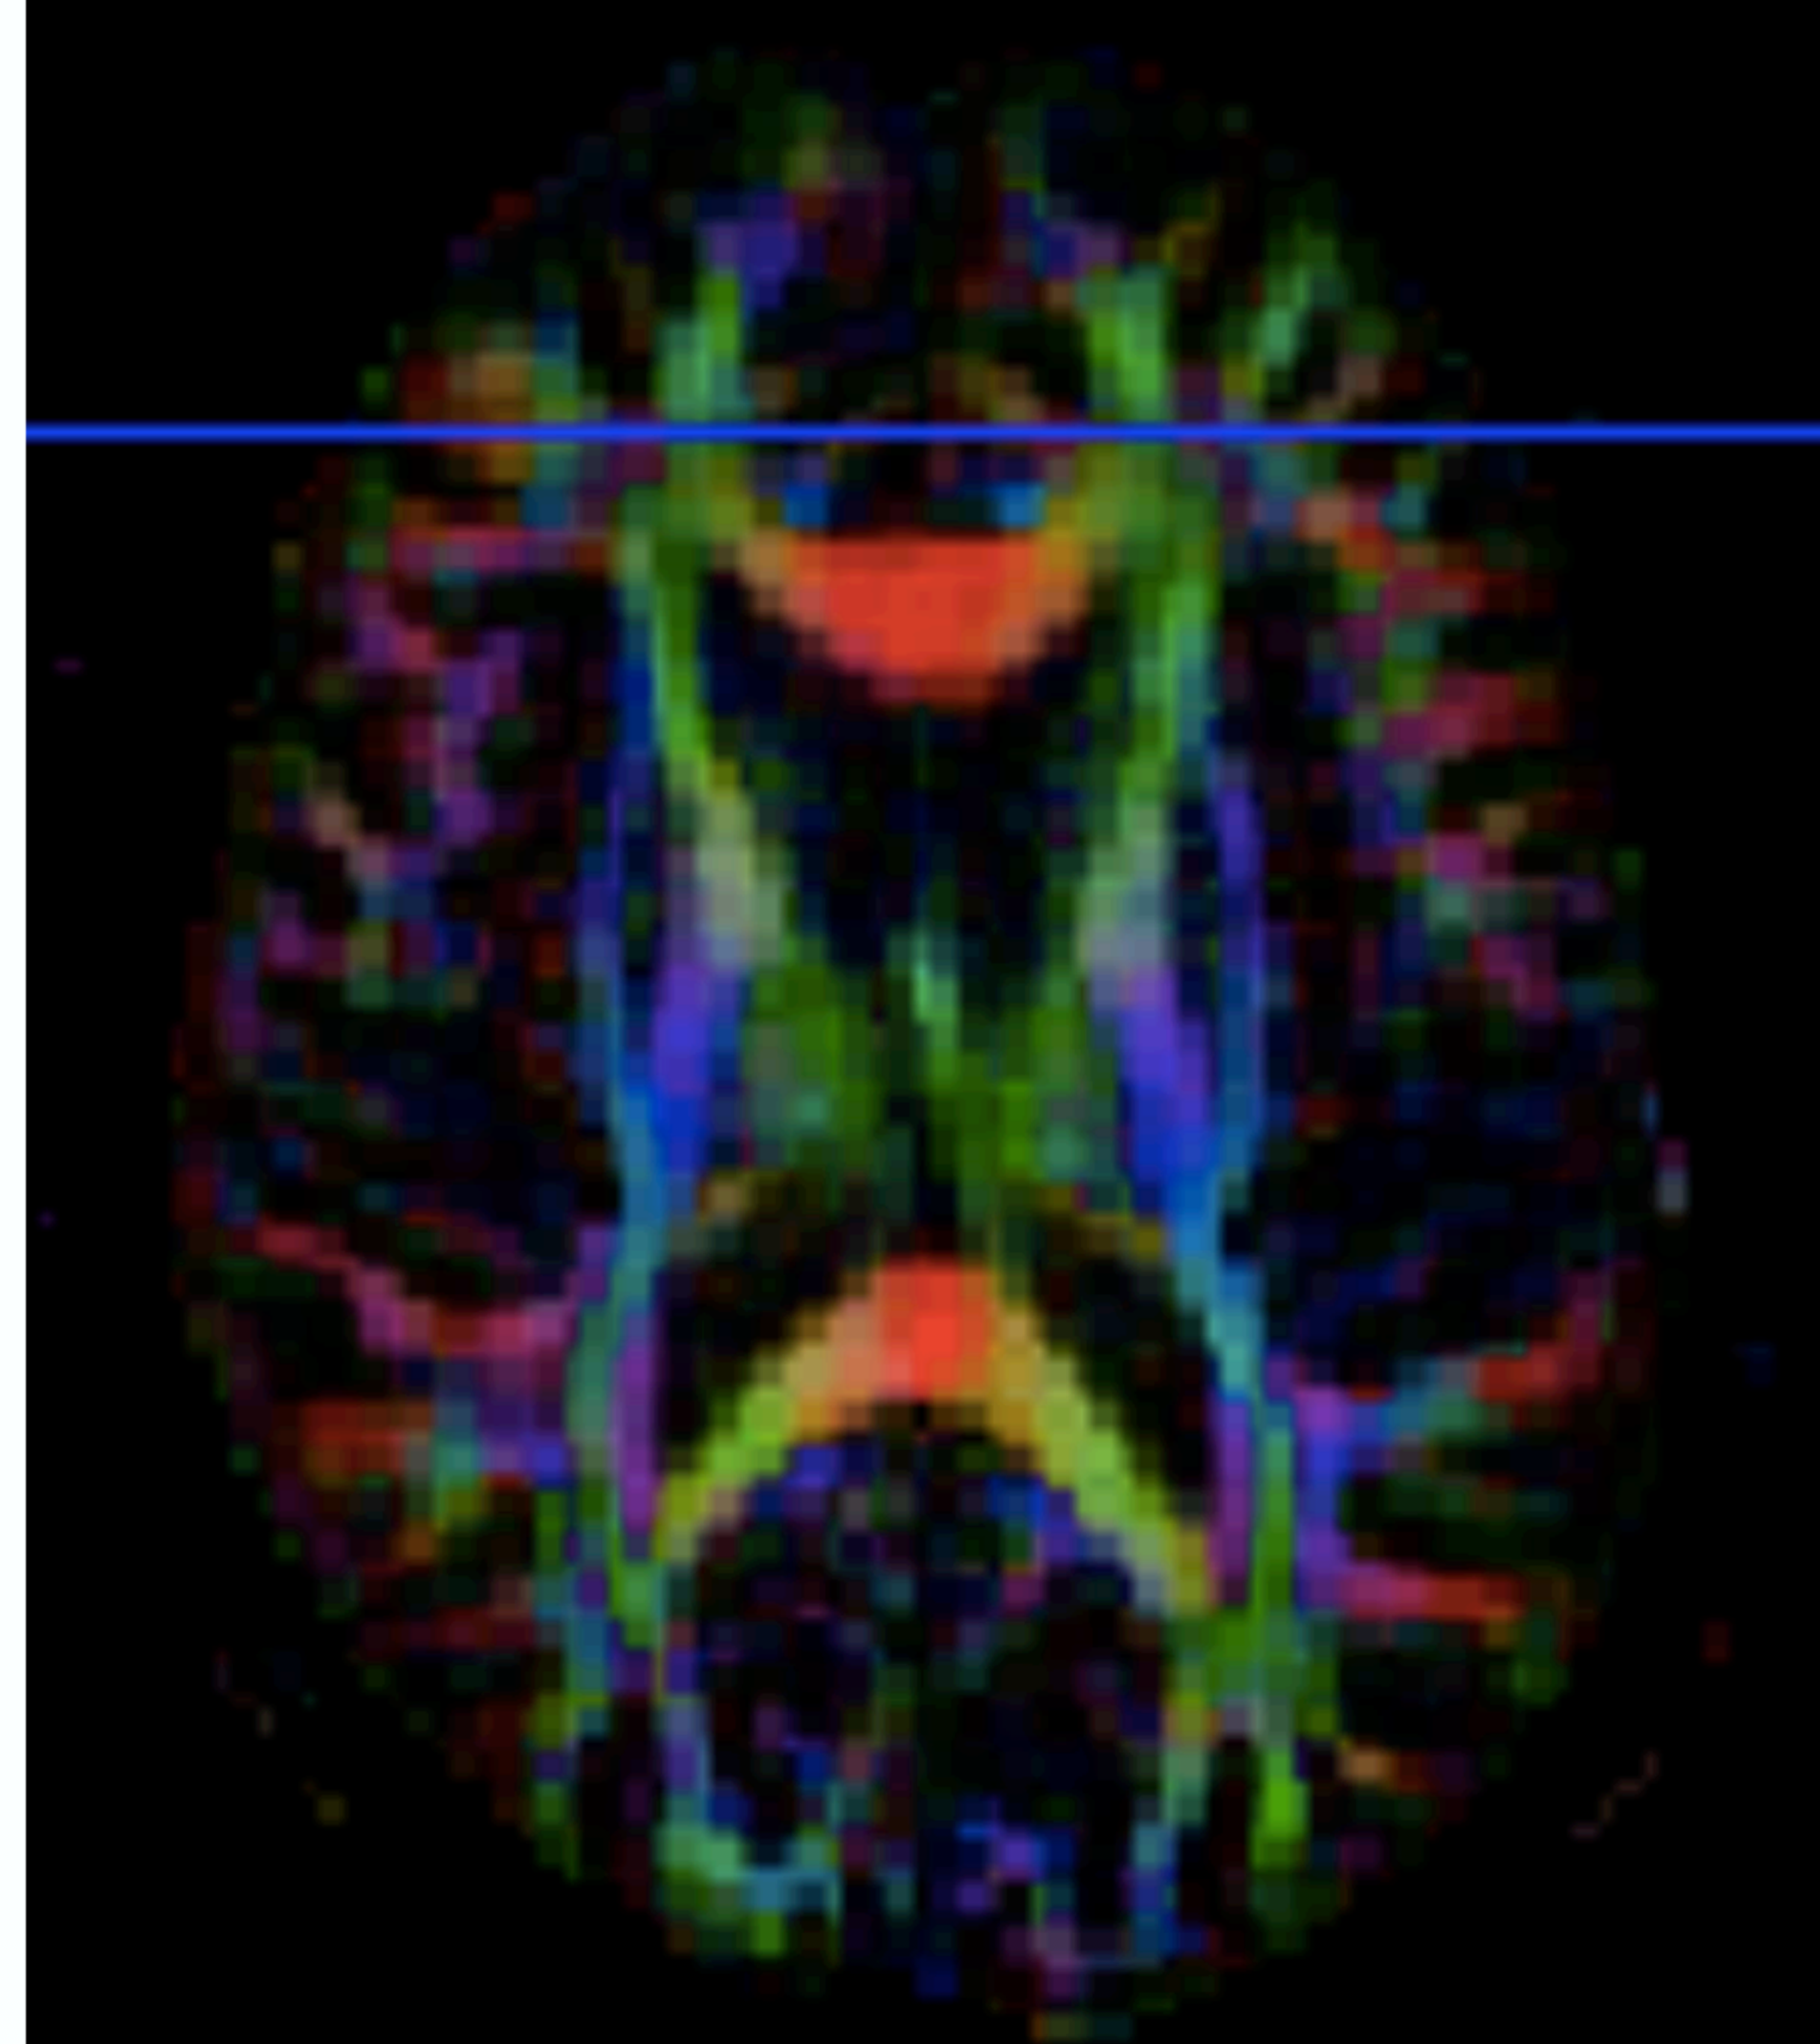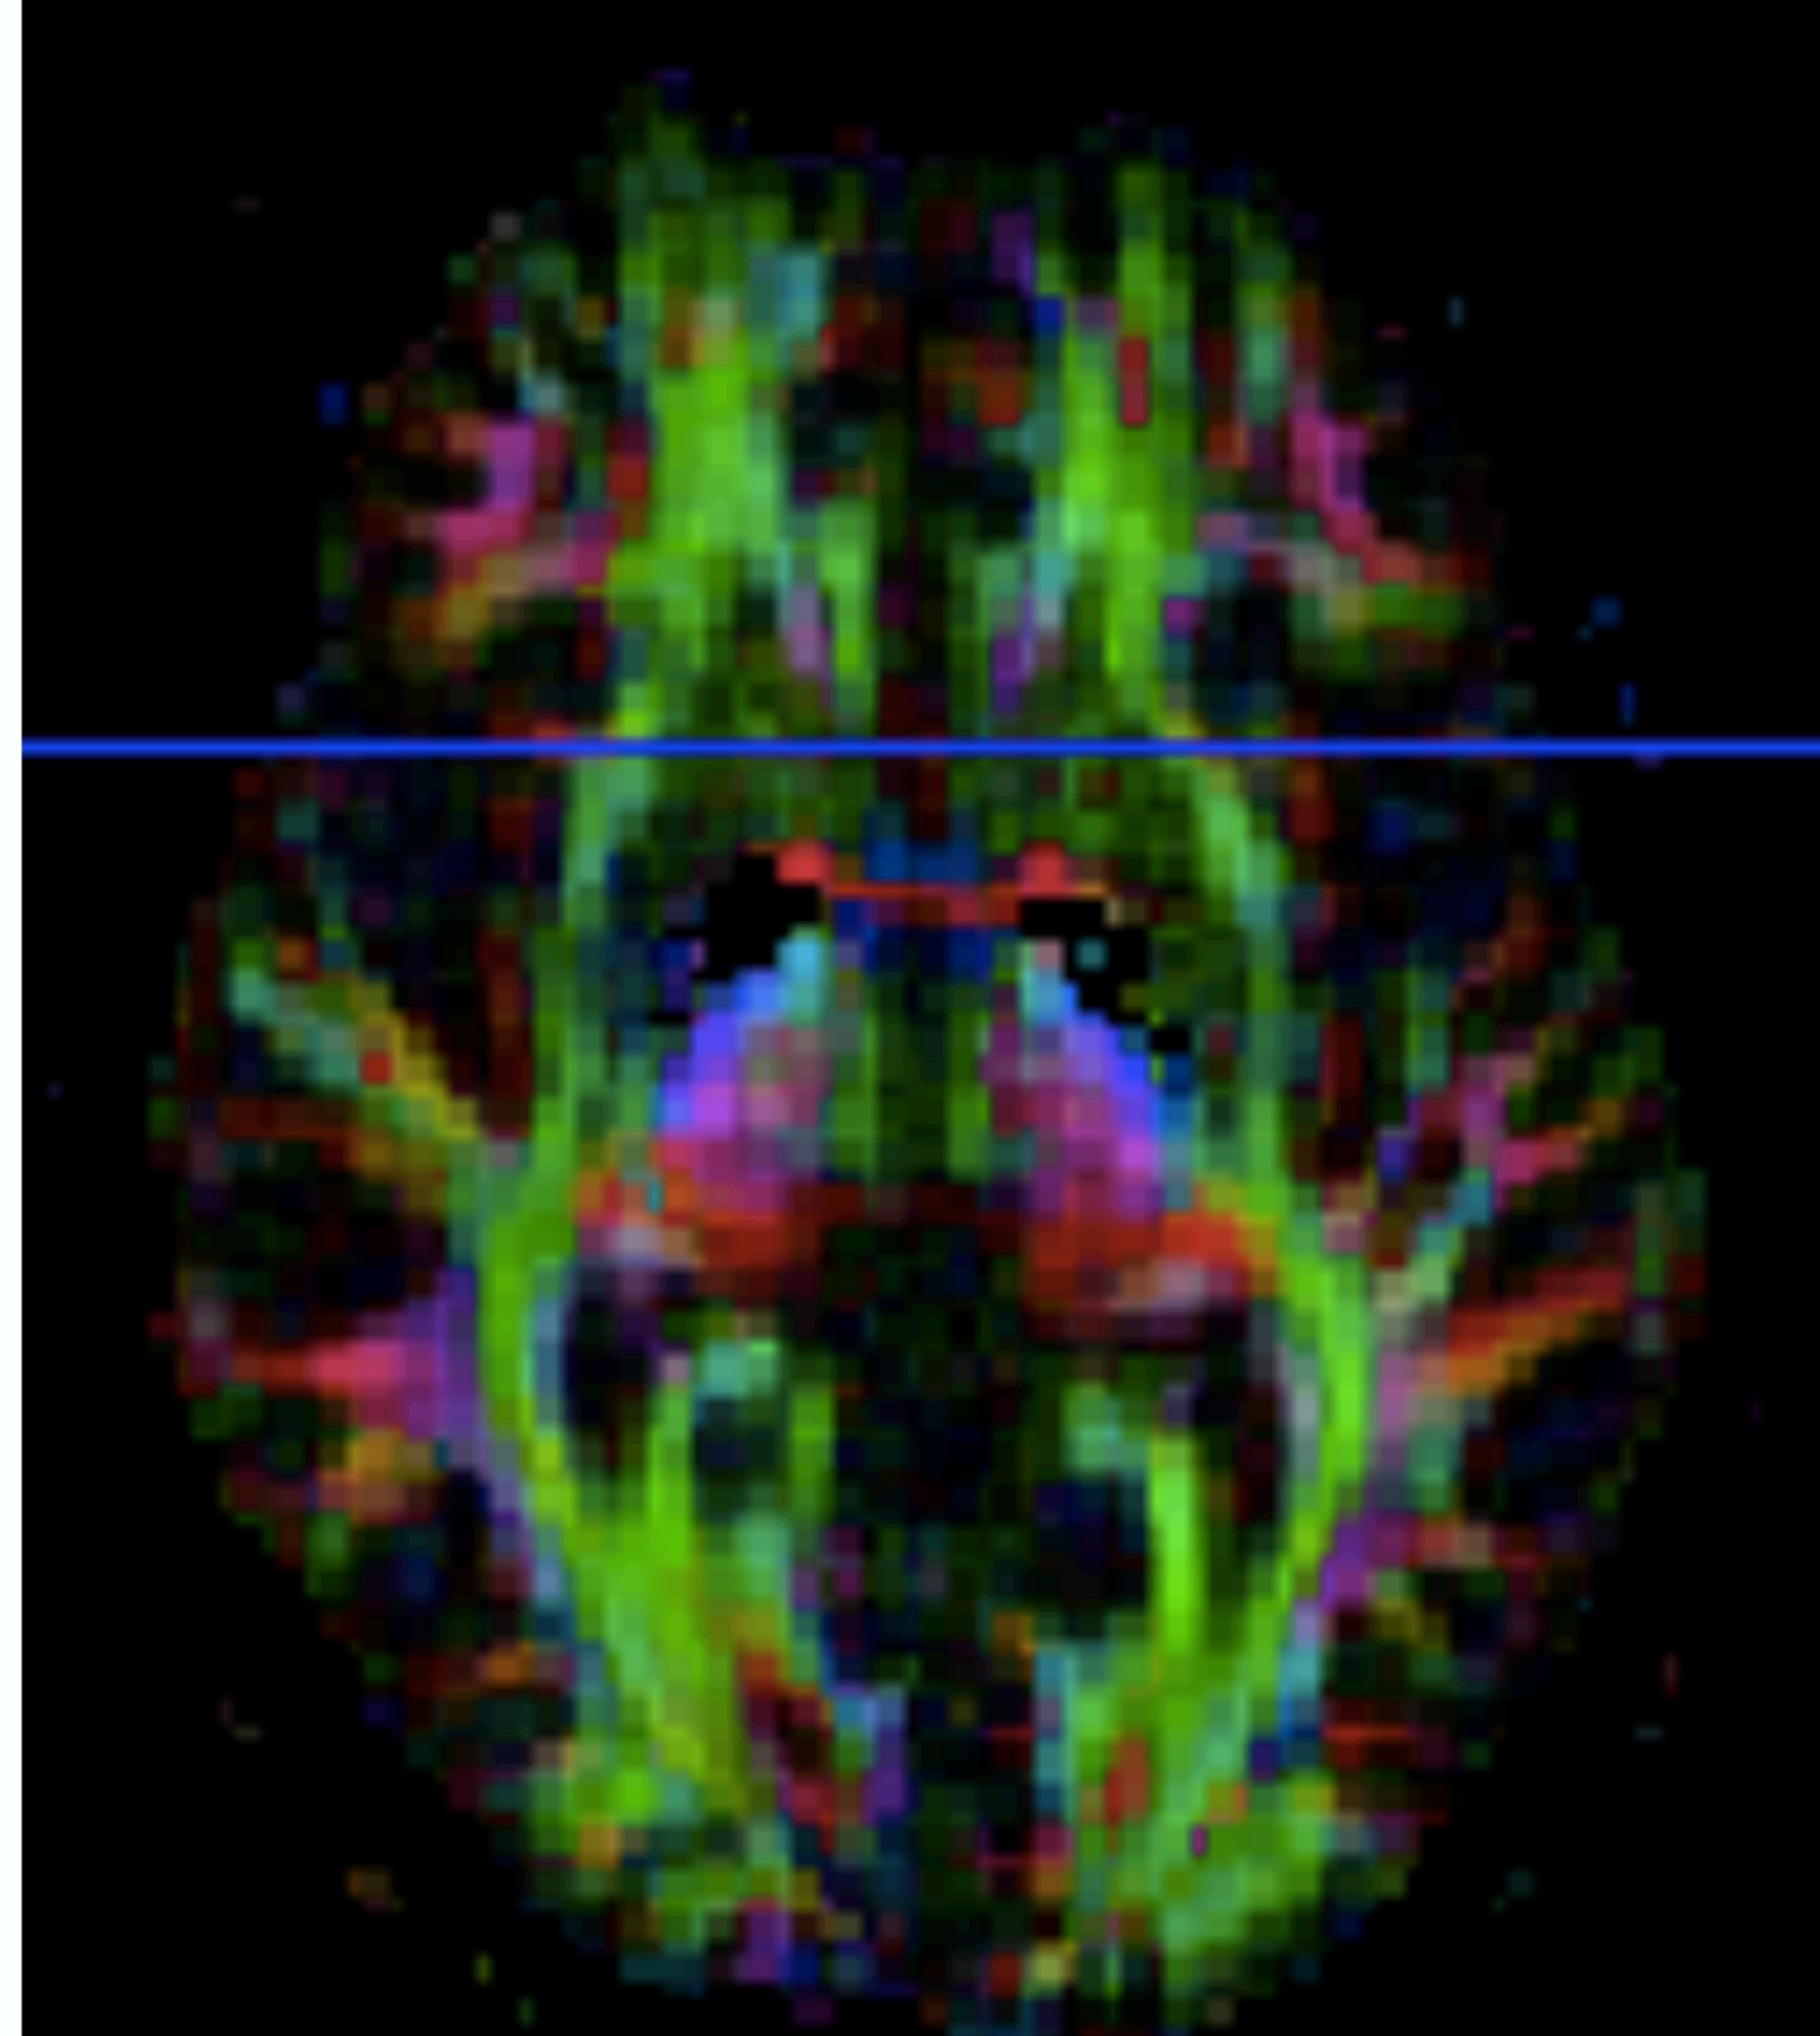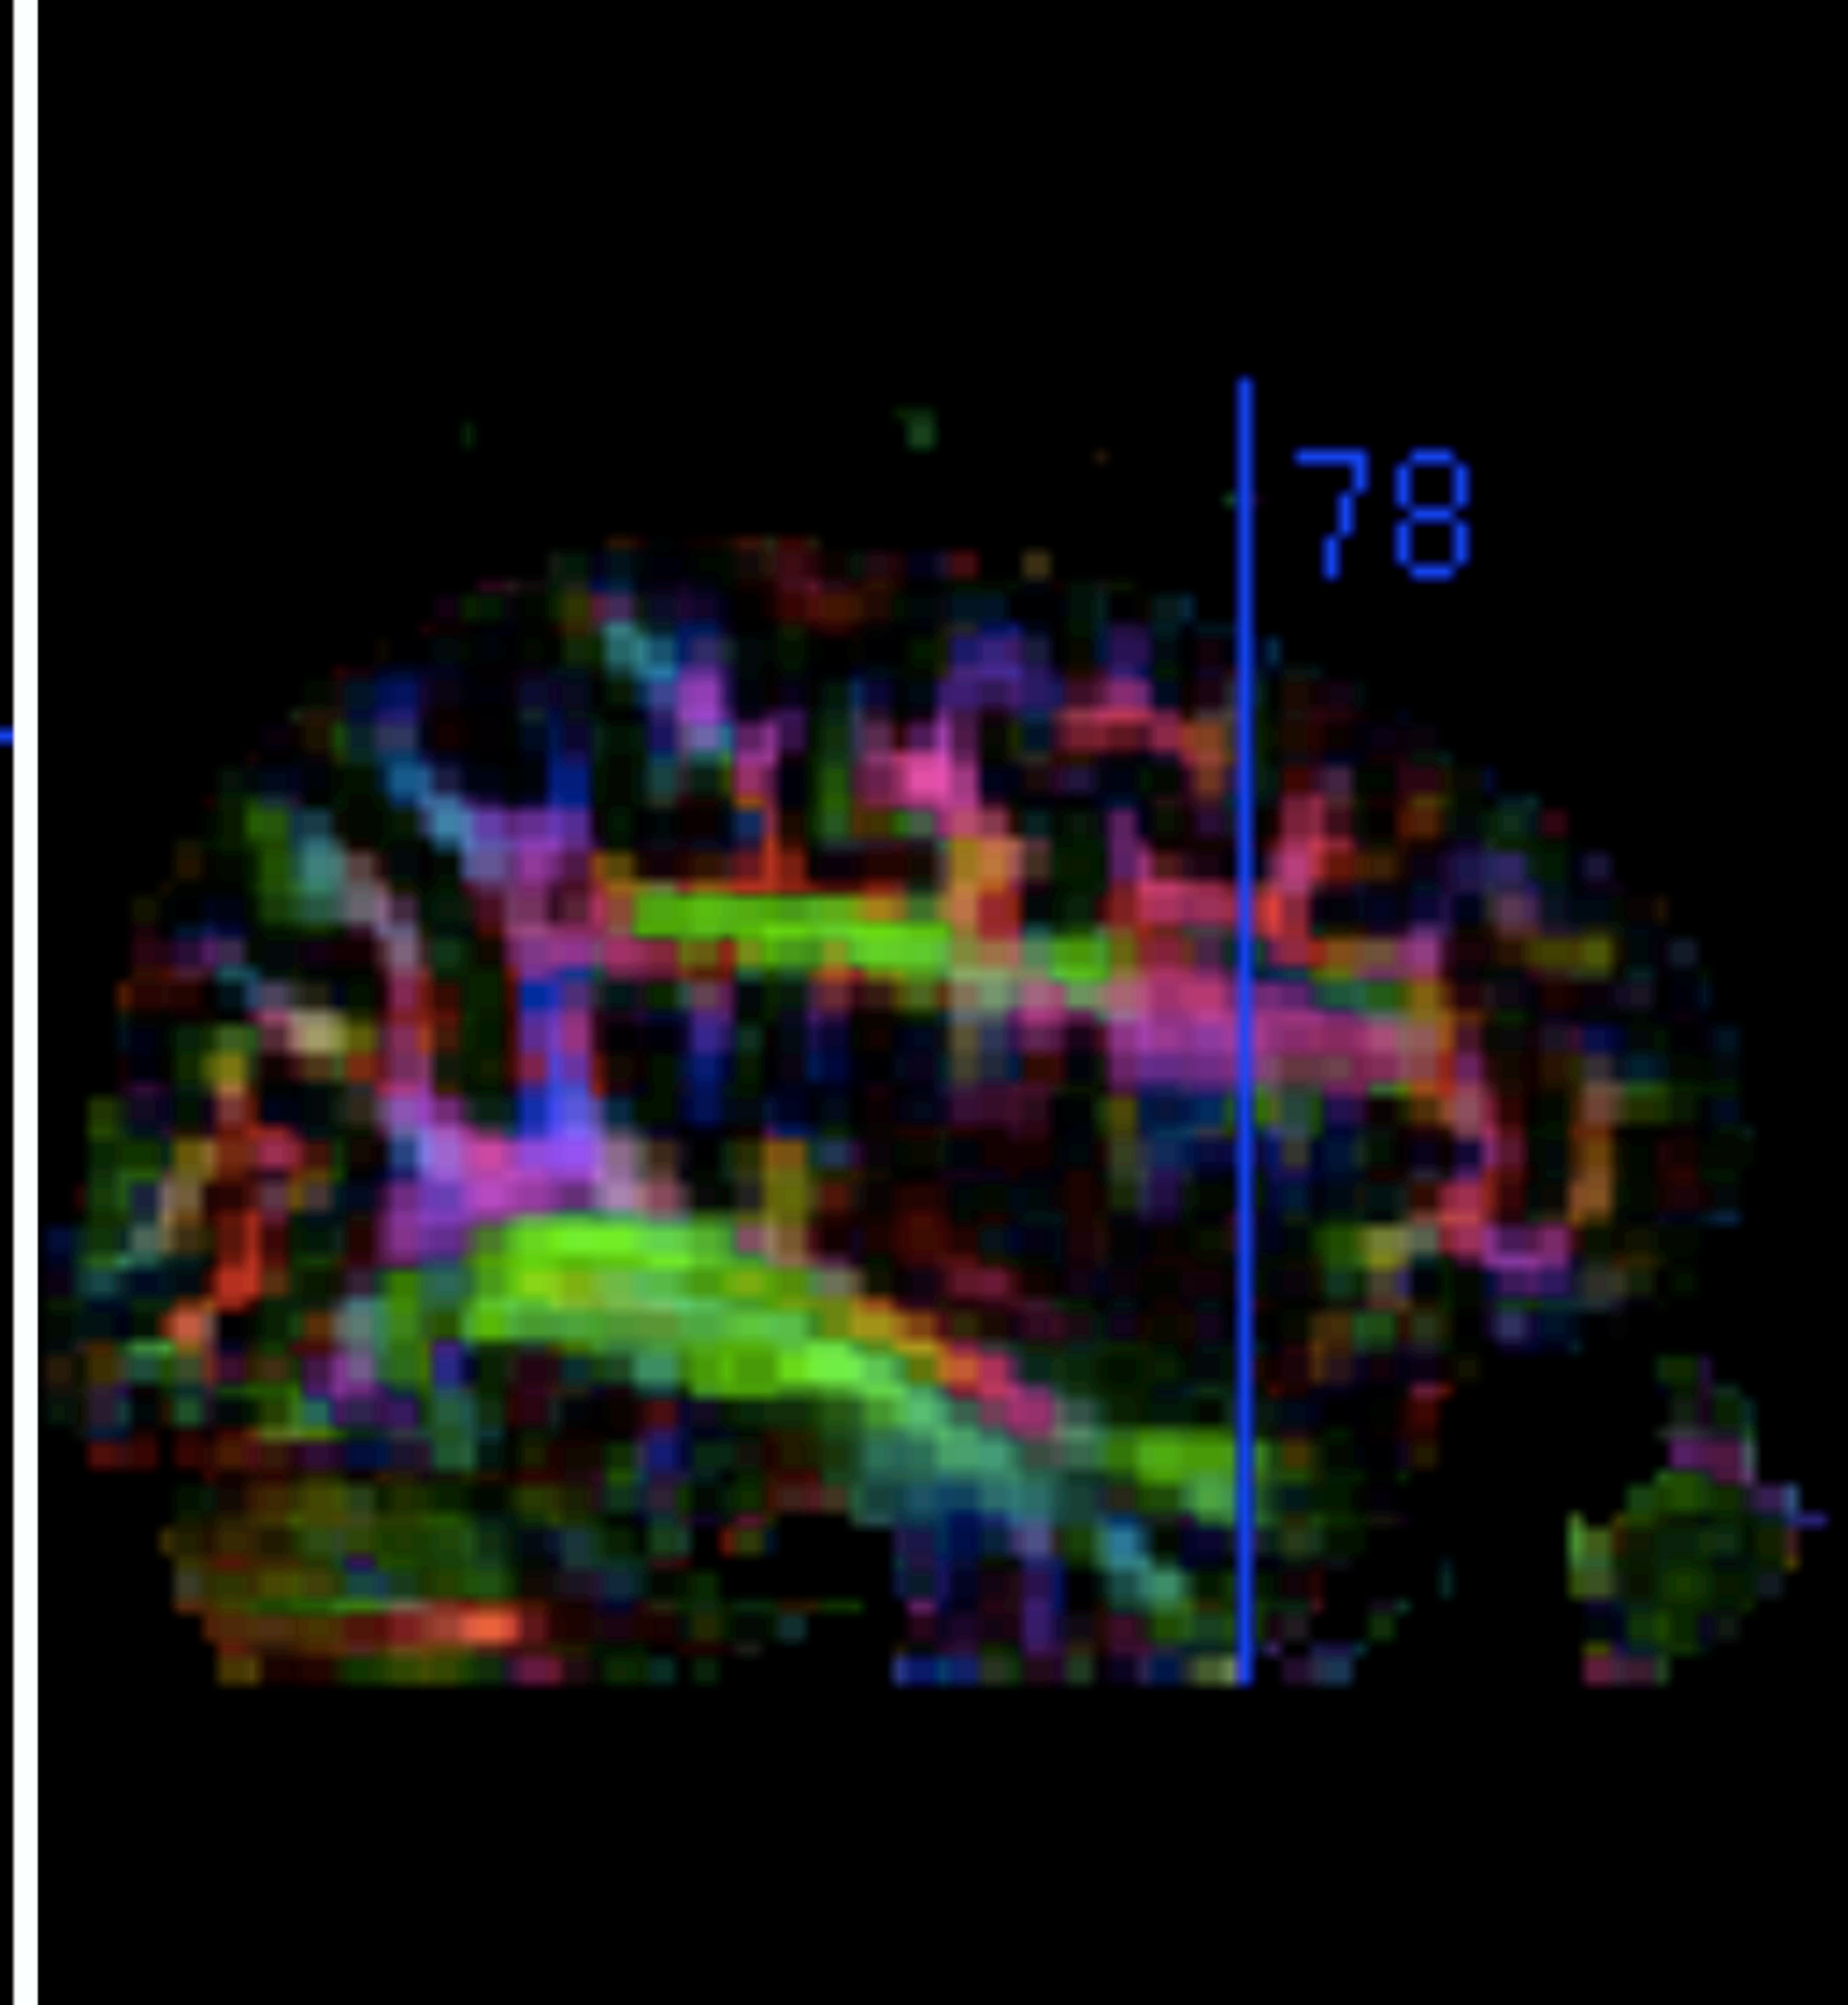



h.

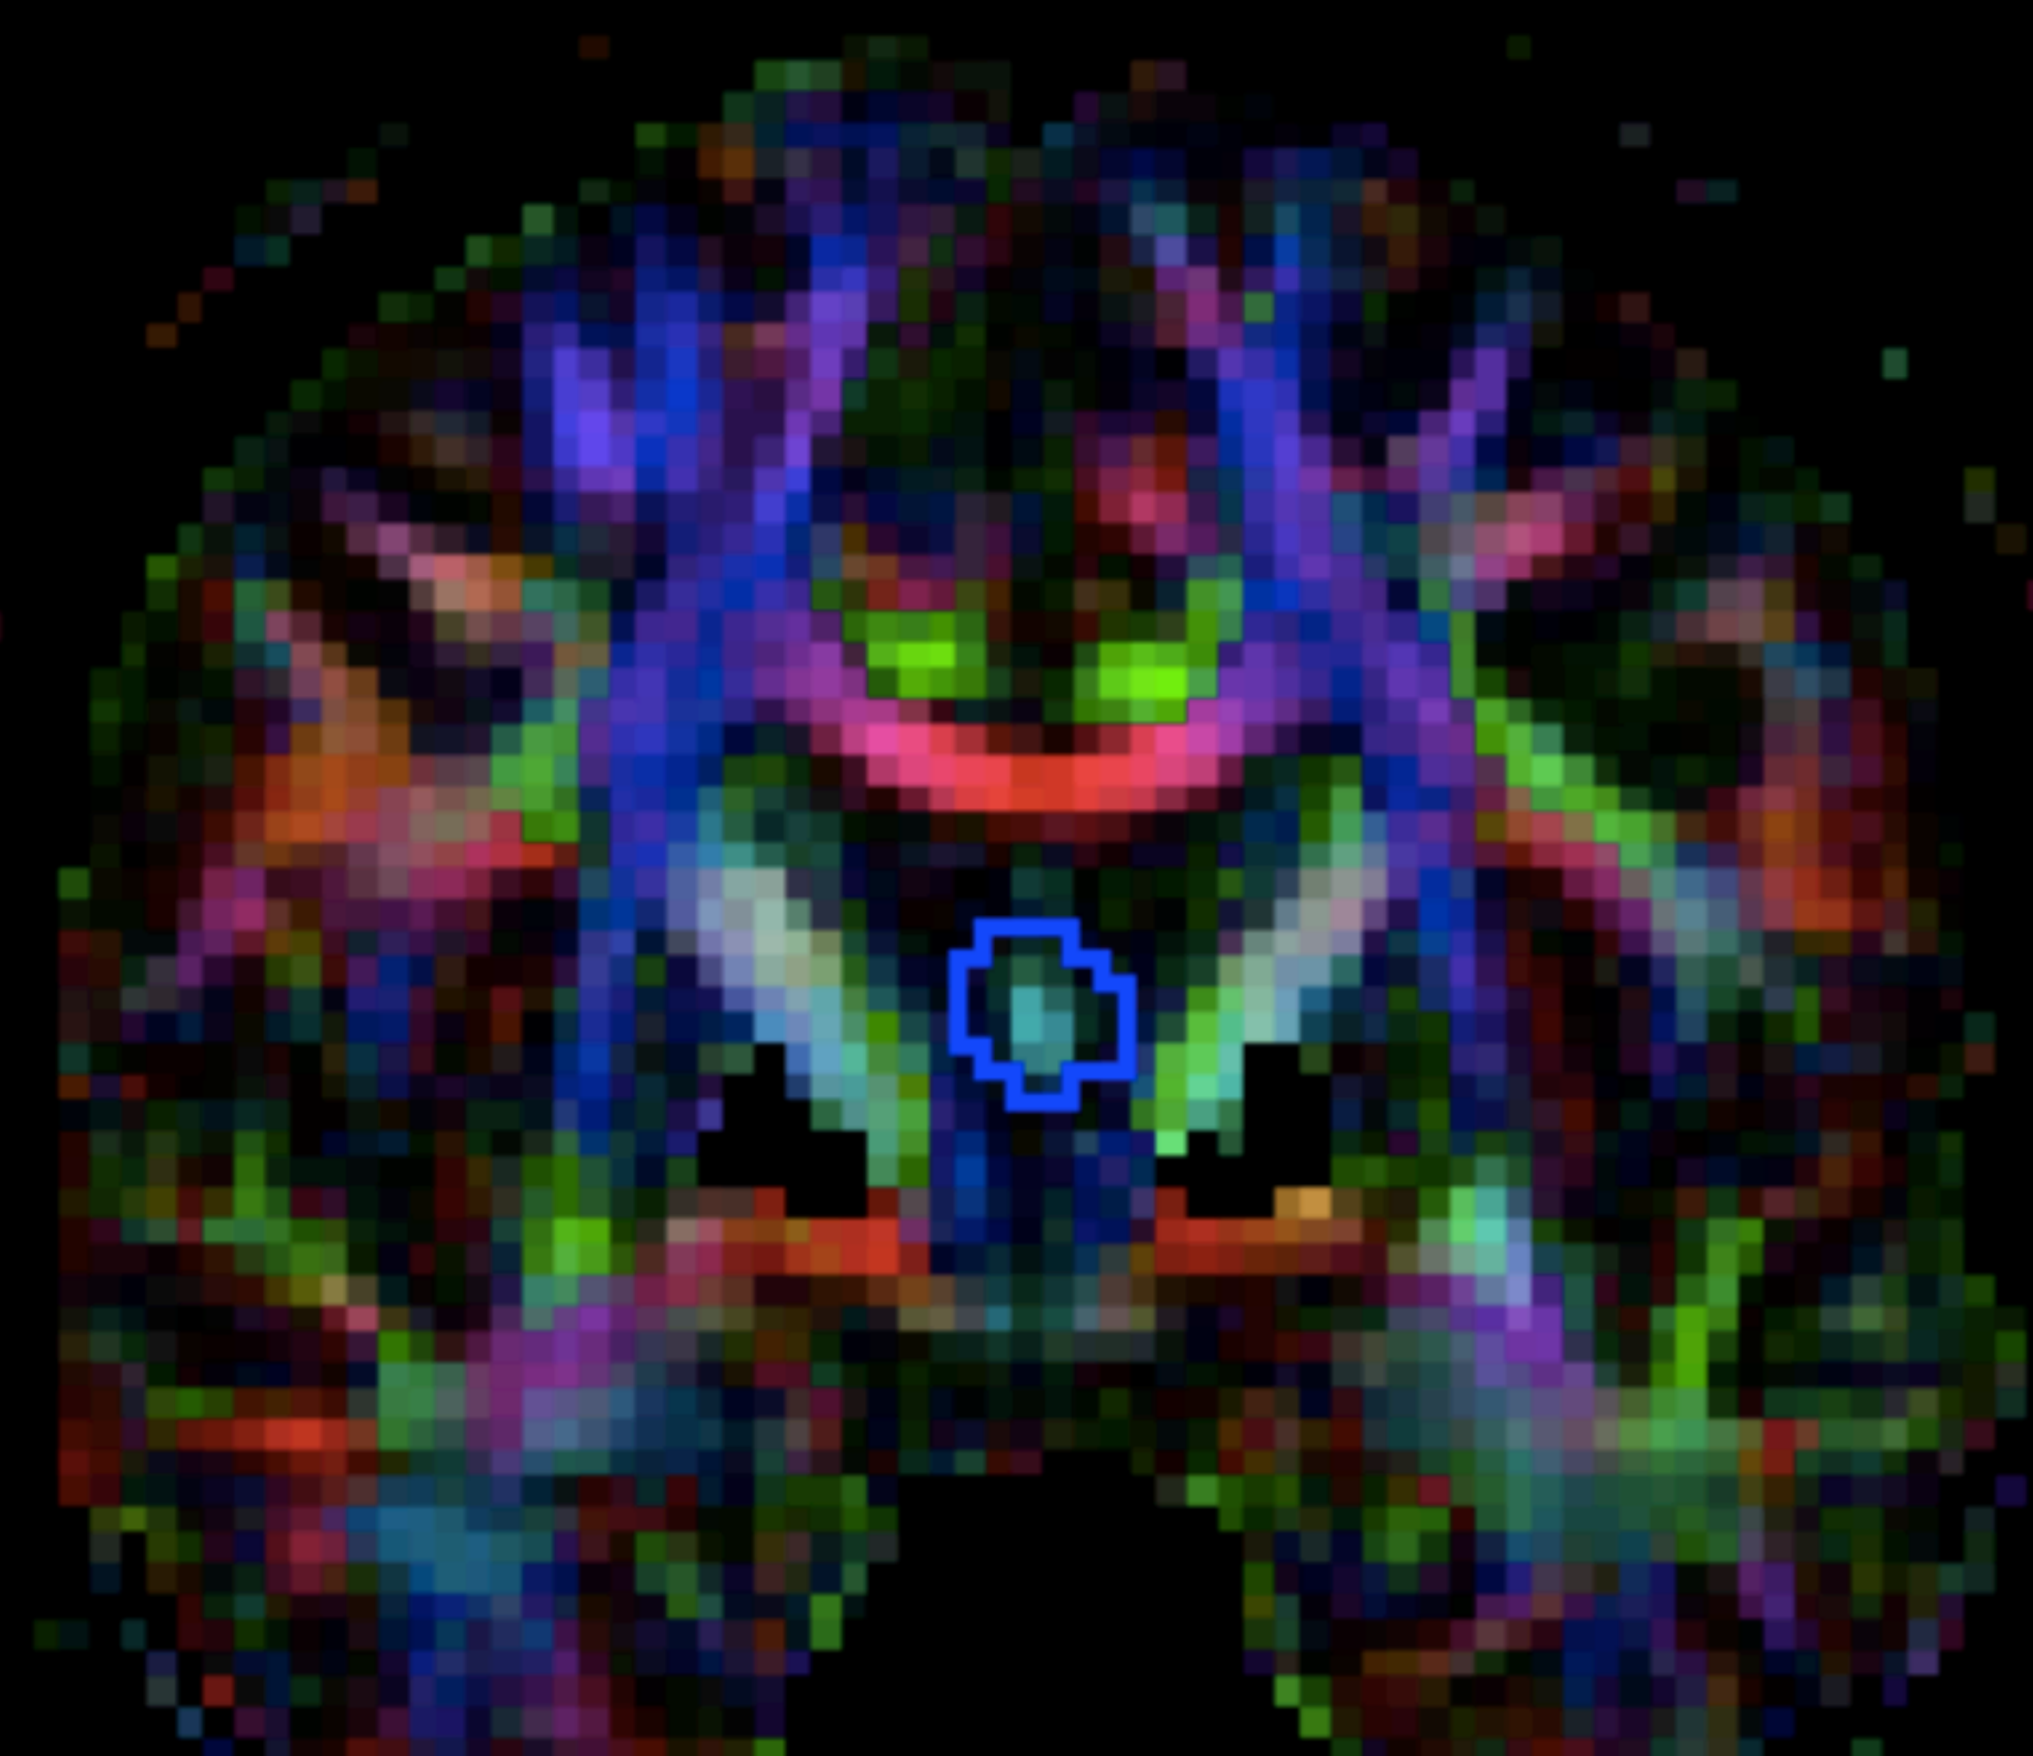

ROI 1

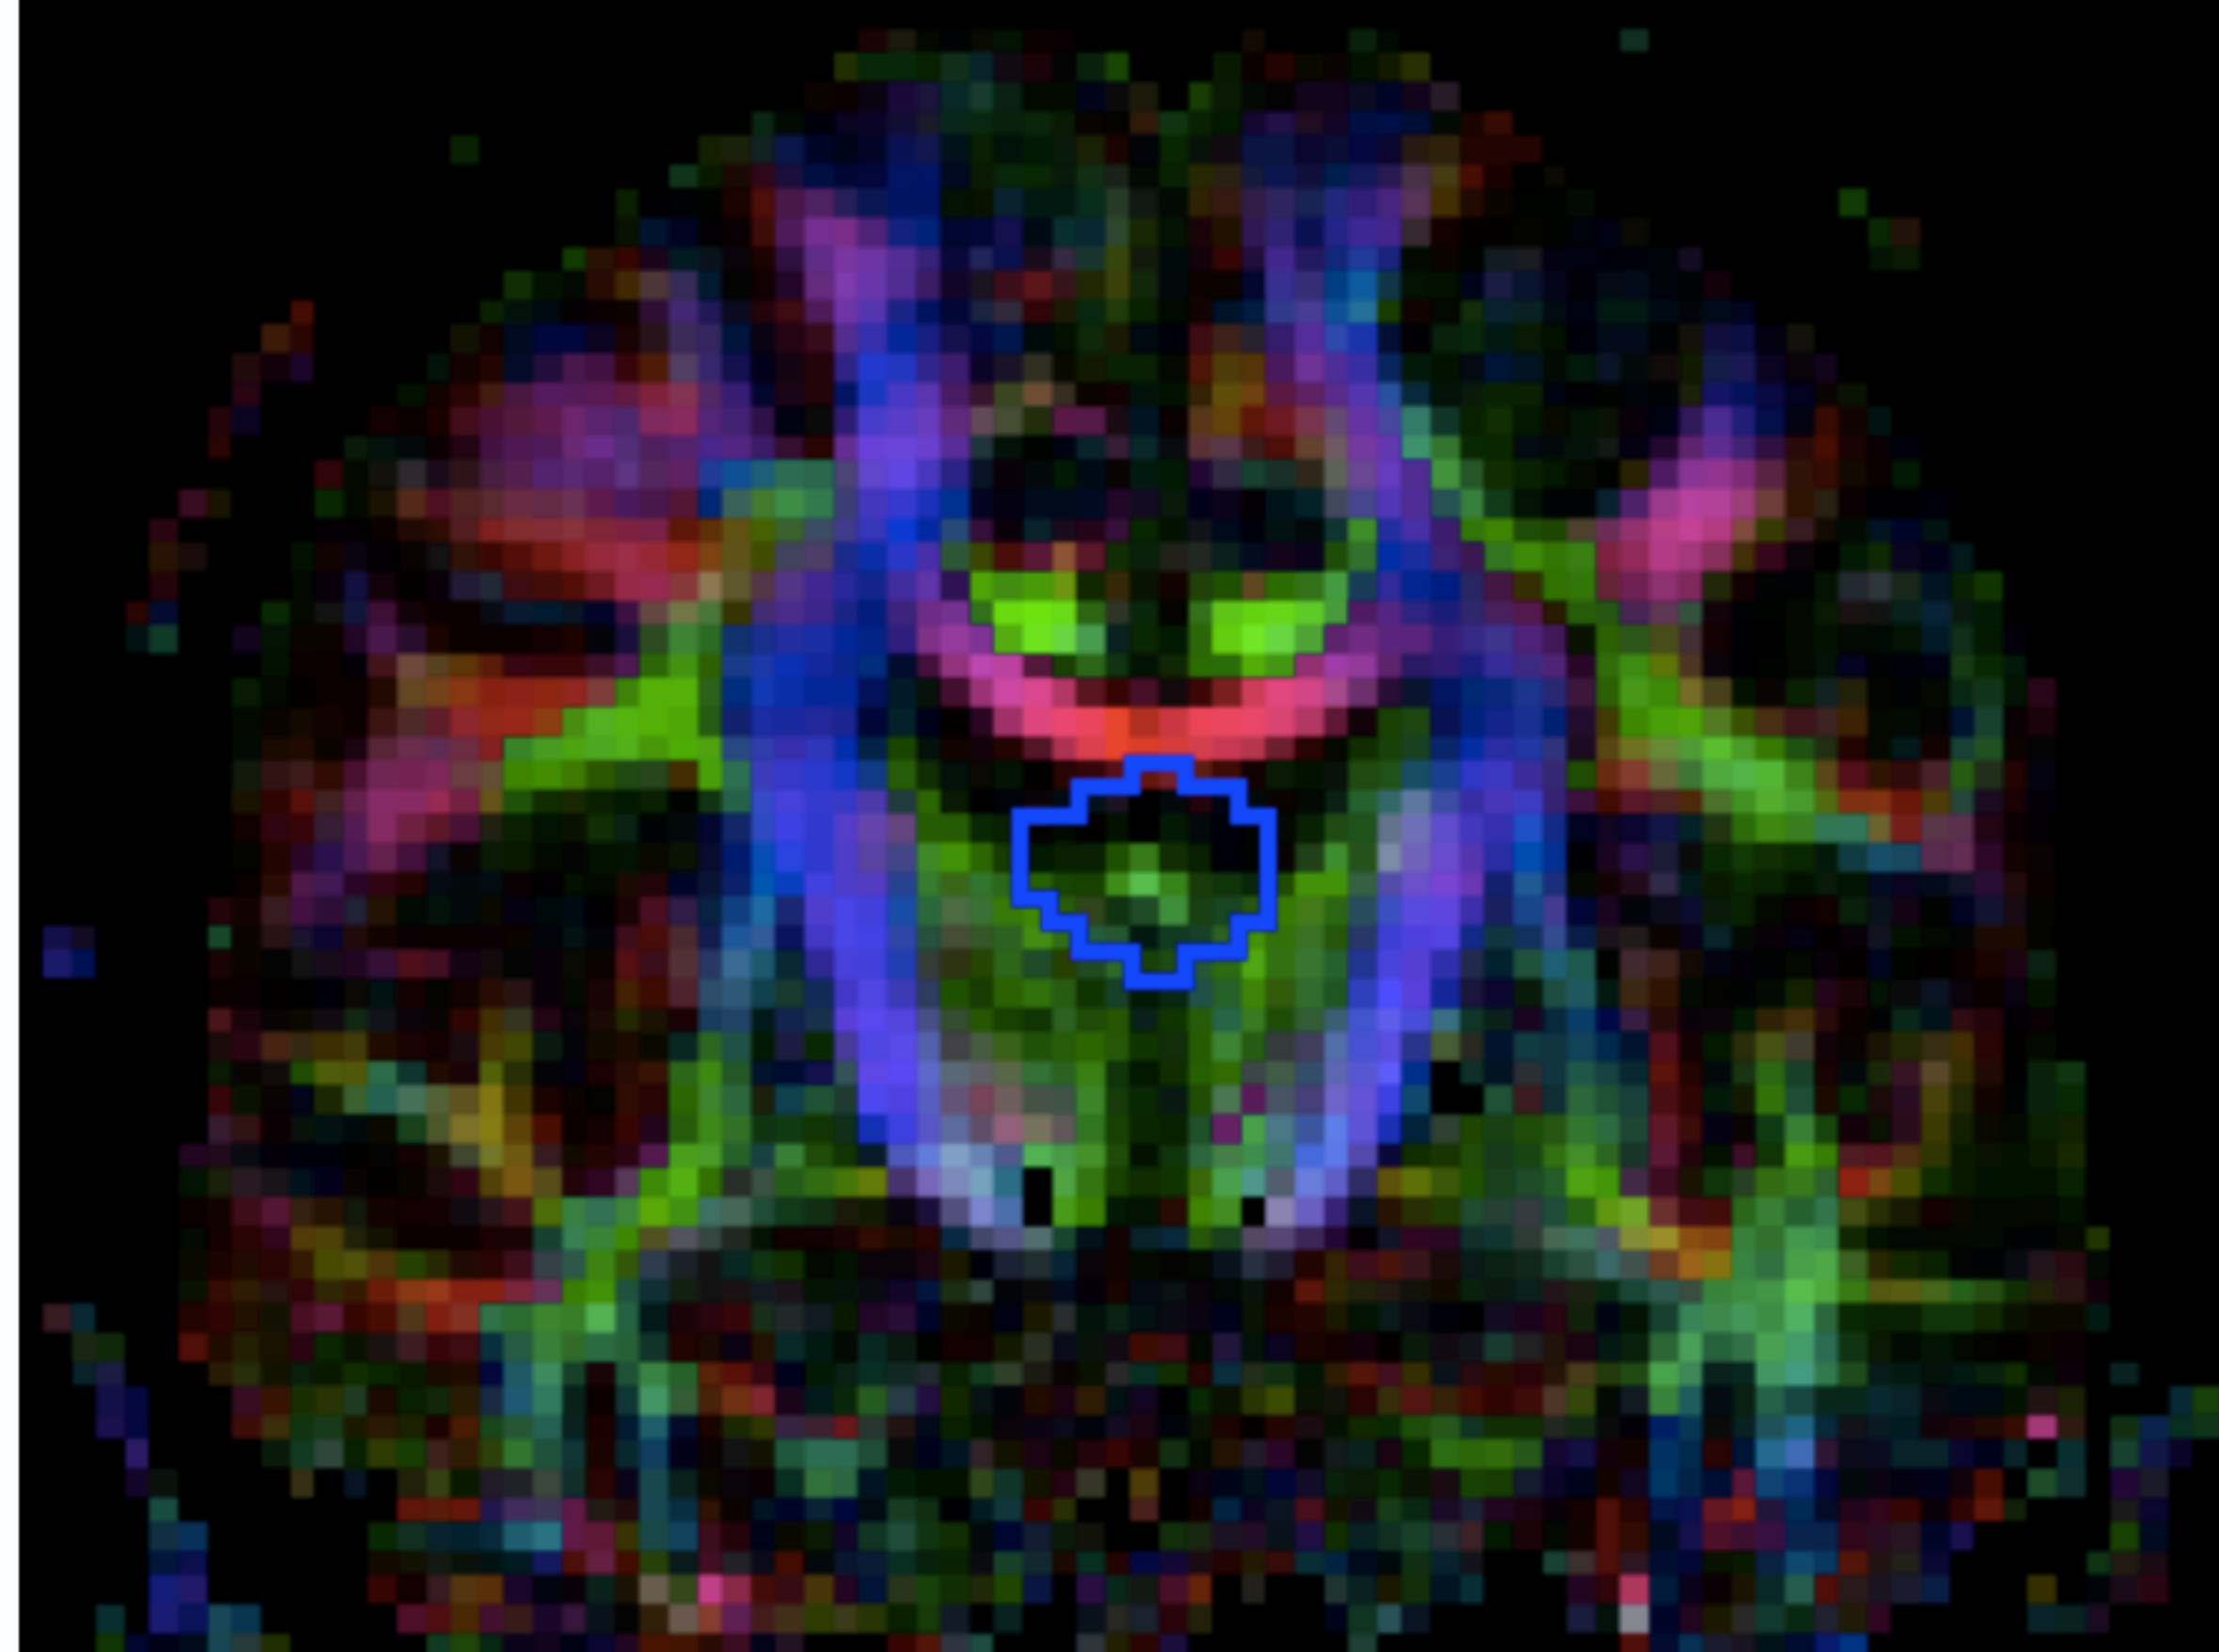

ROI 2

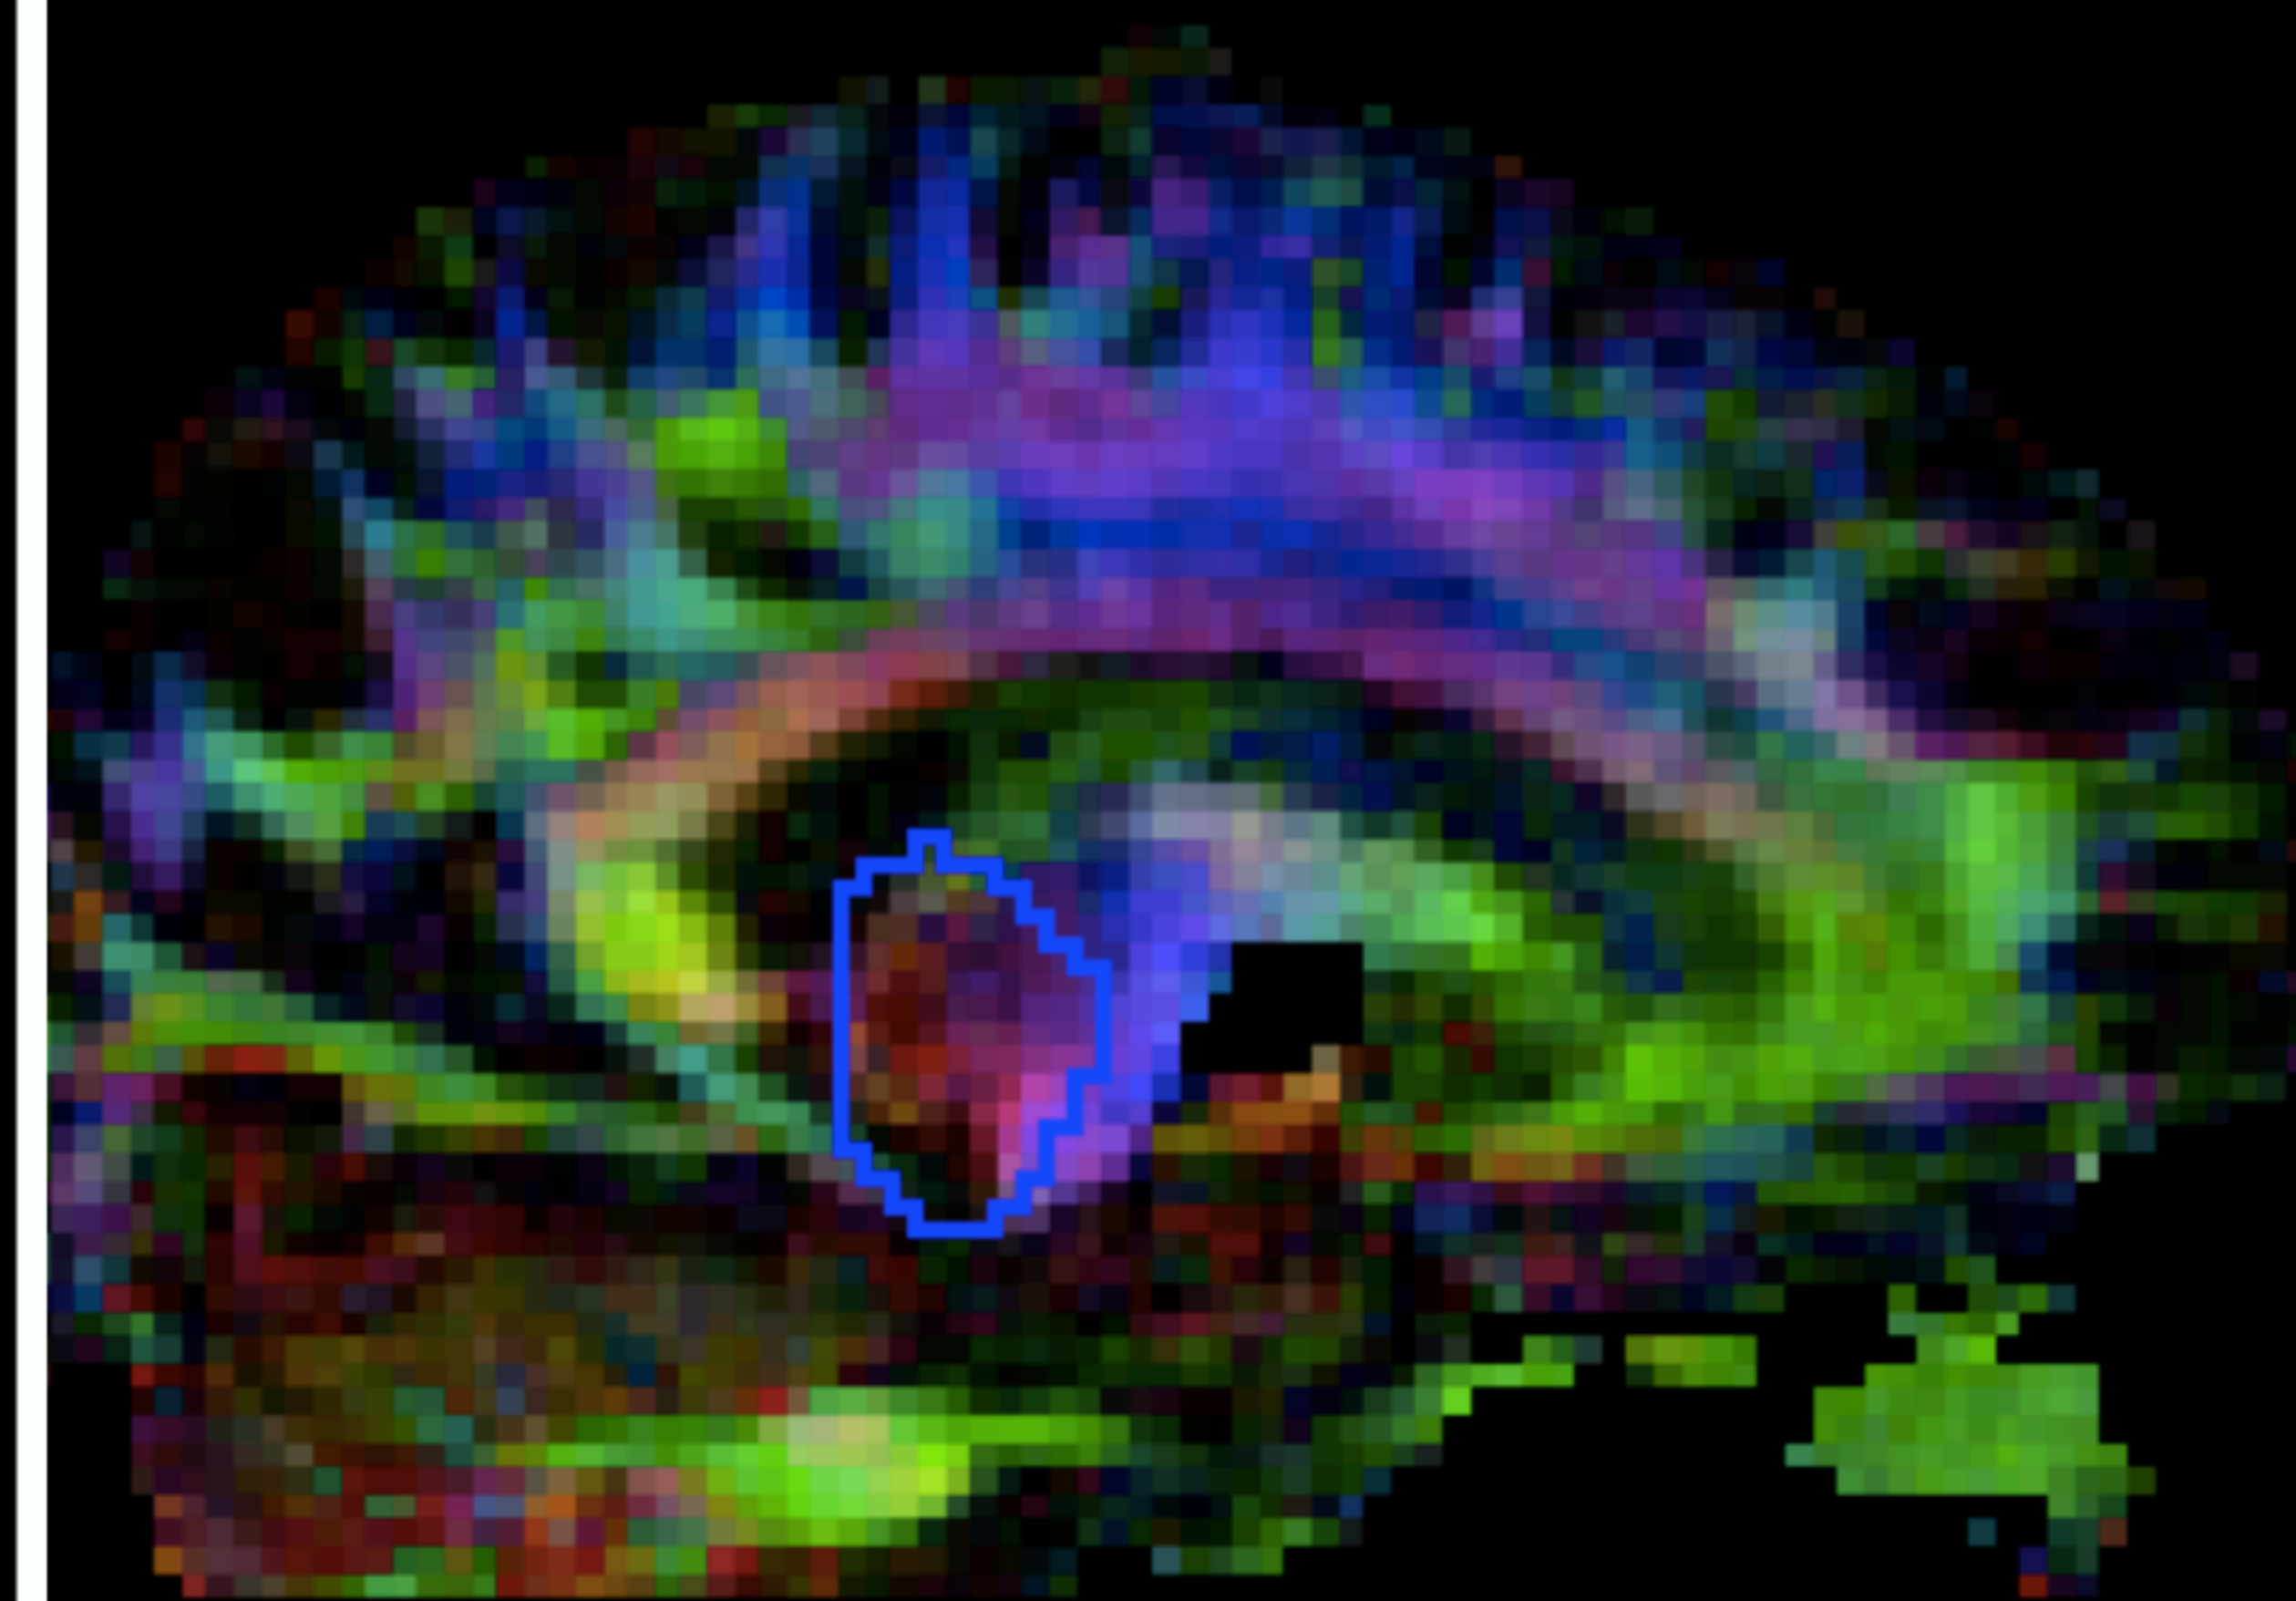

ROI 3

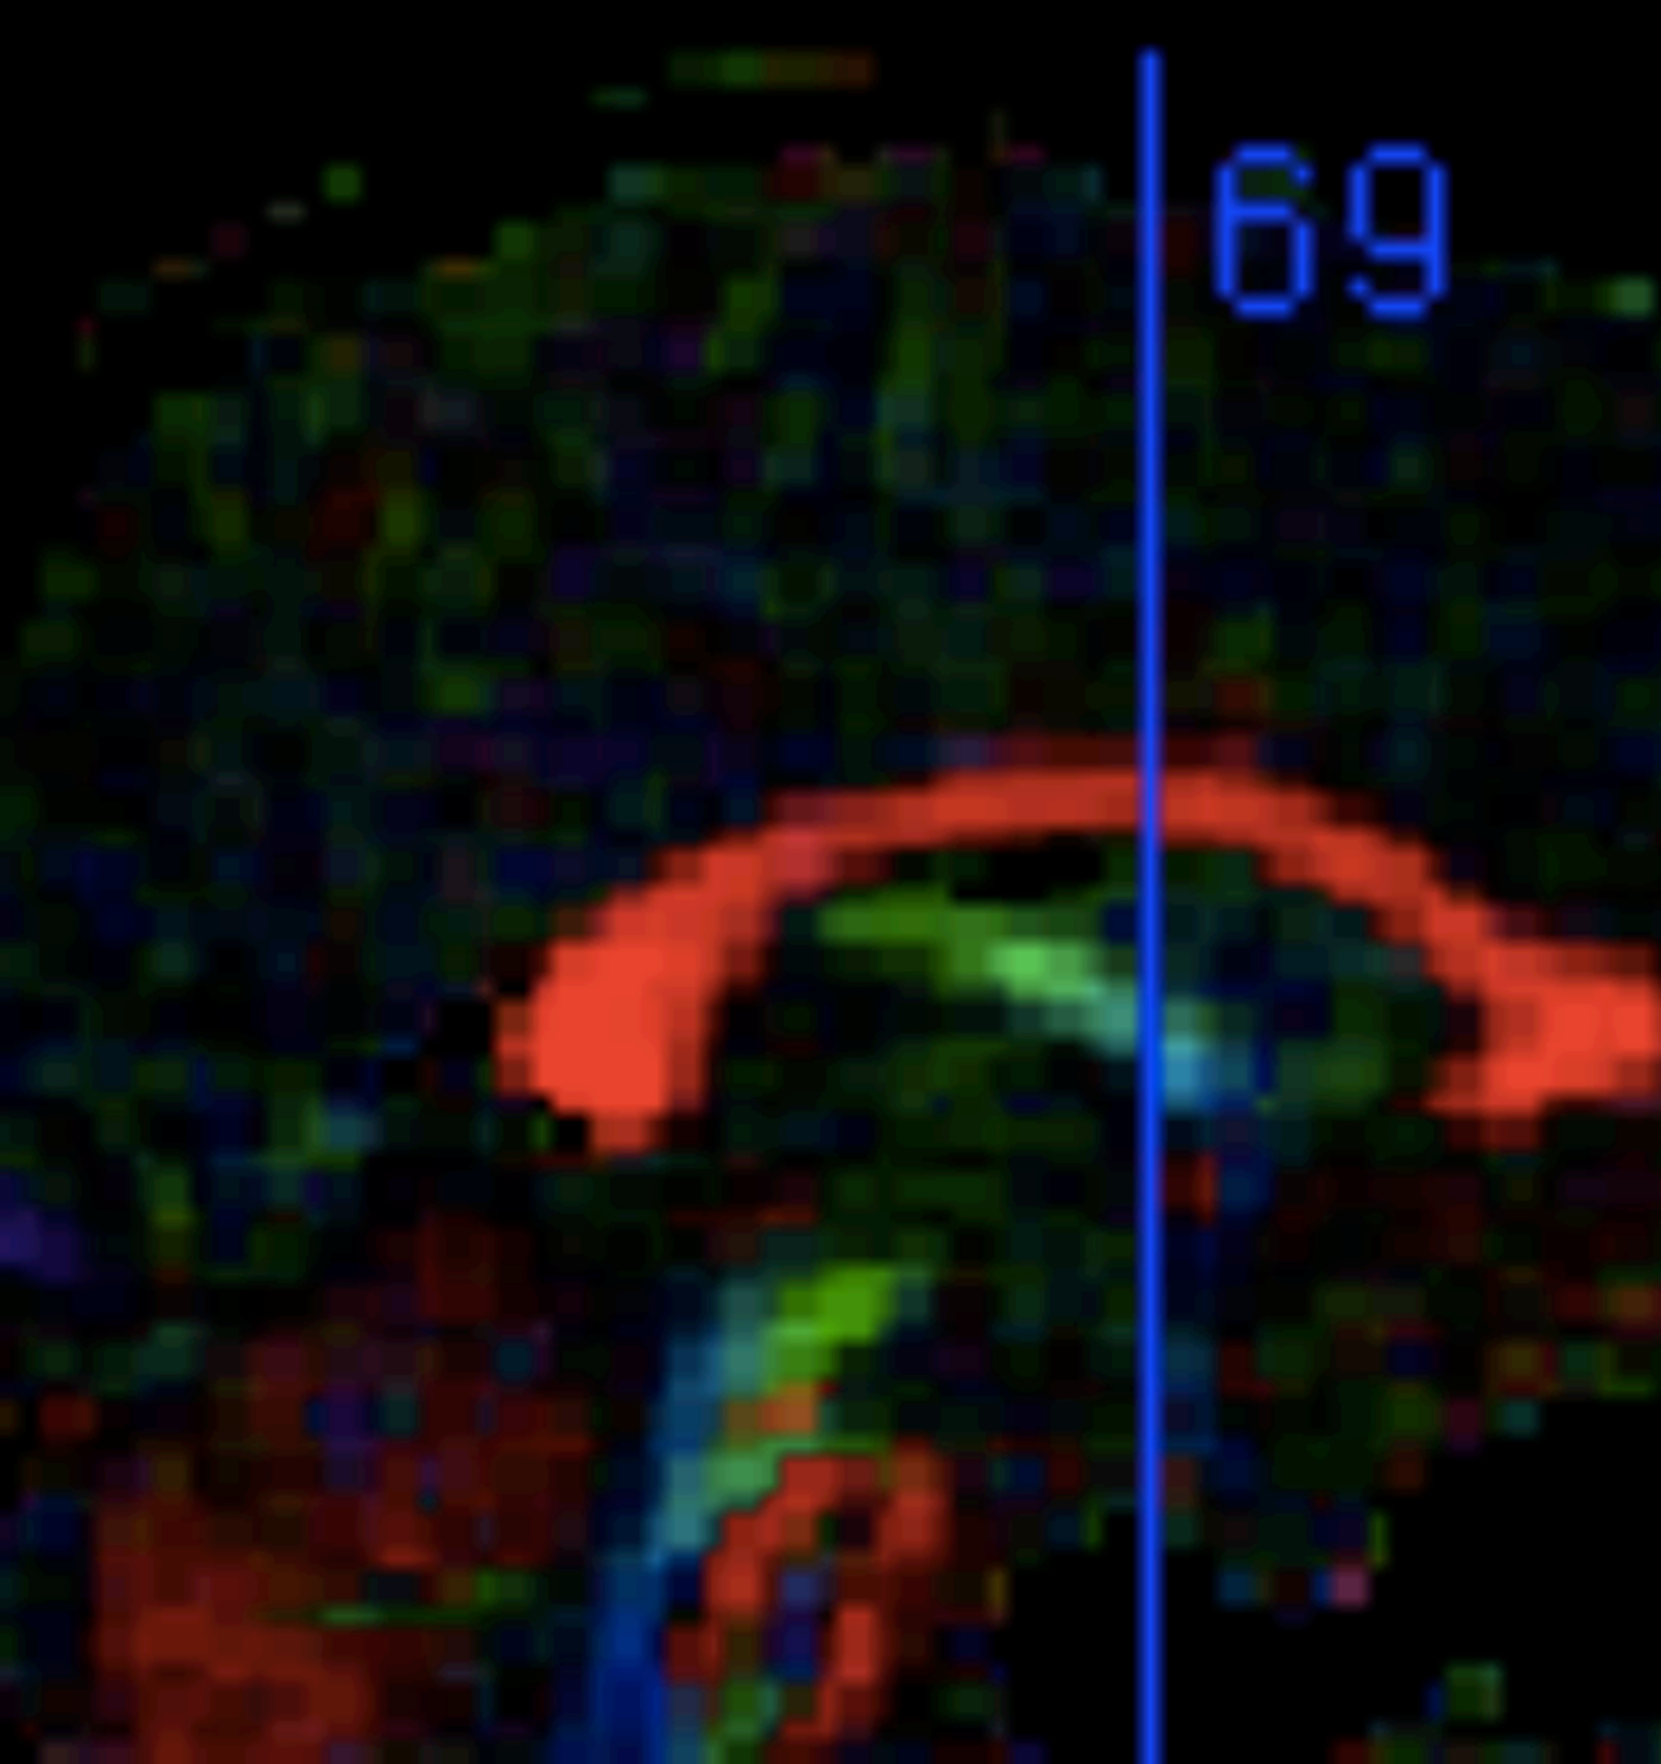

69

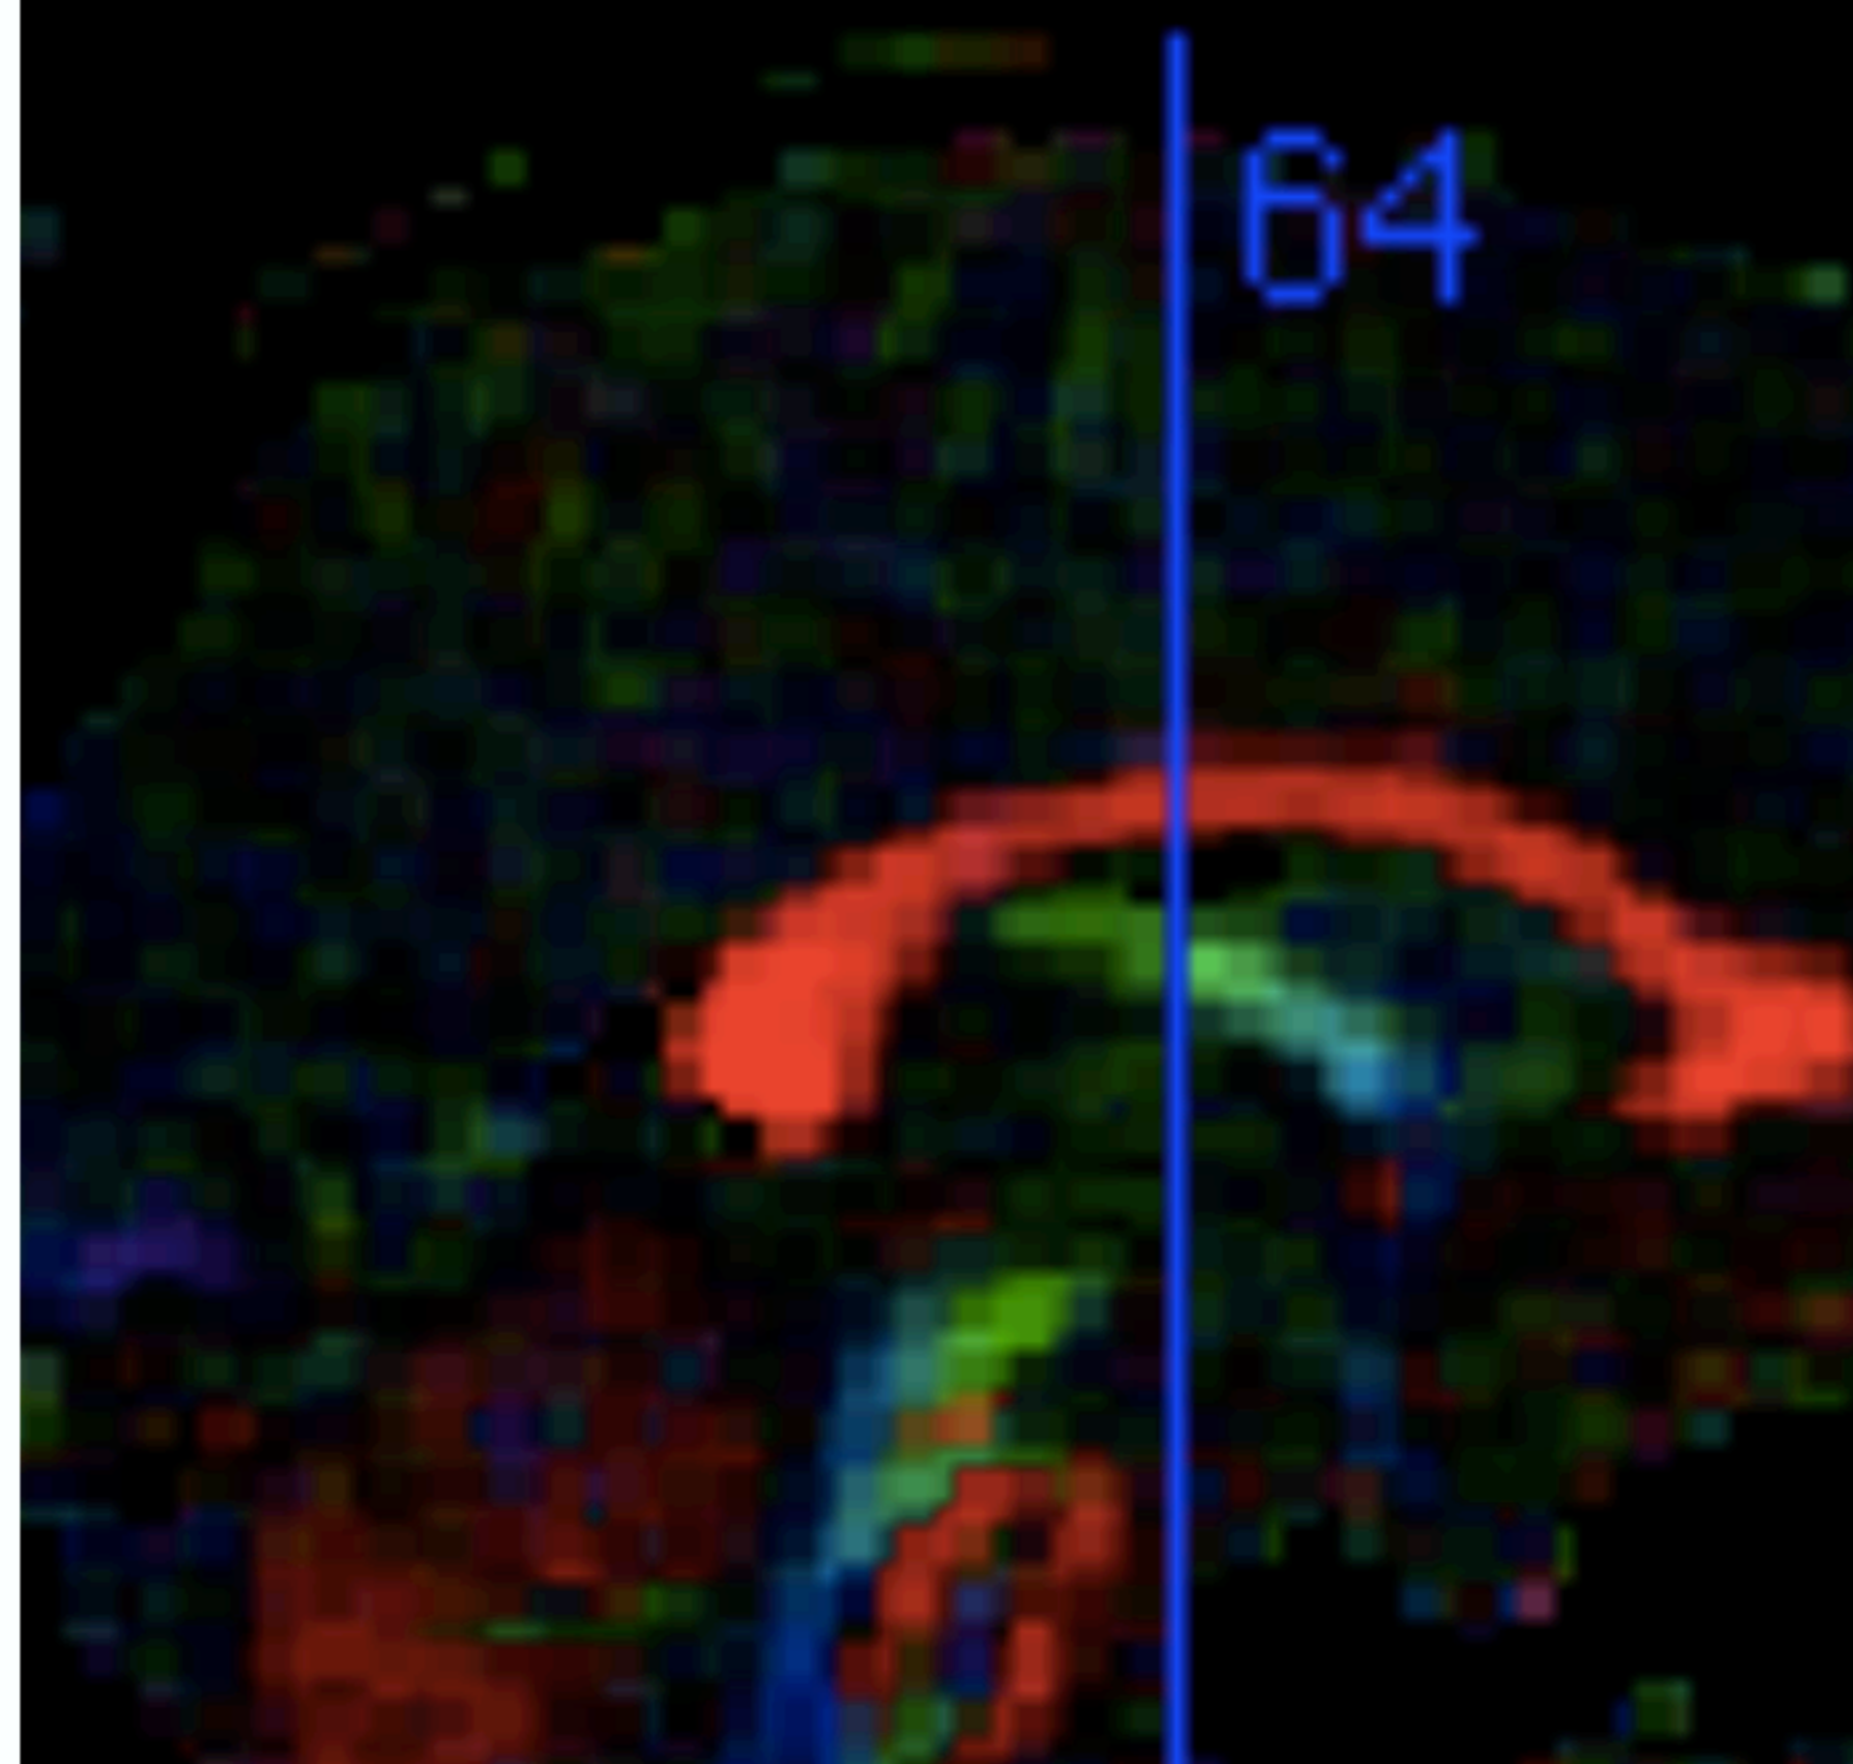

64

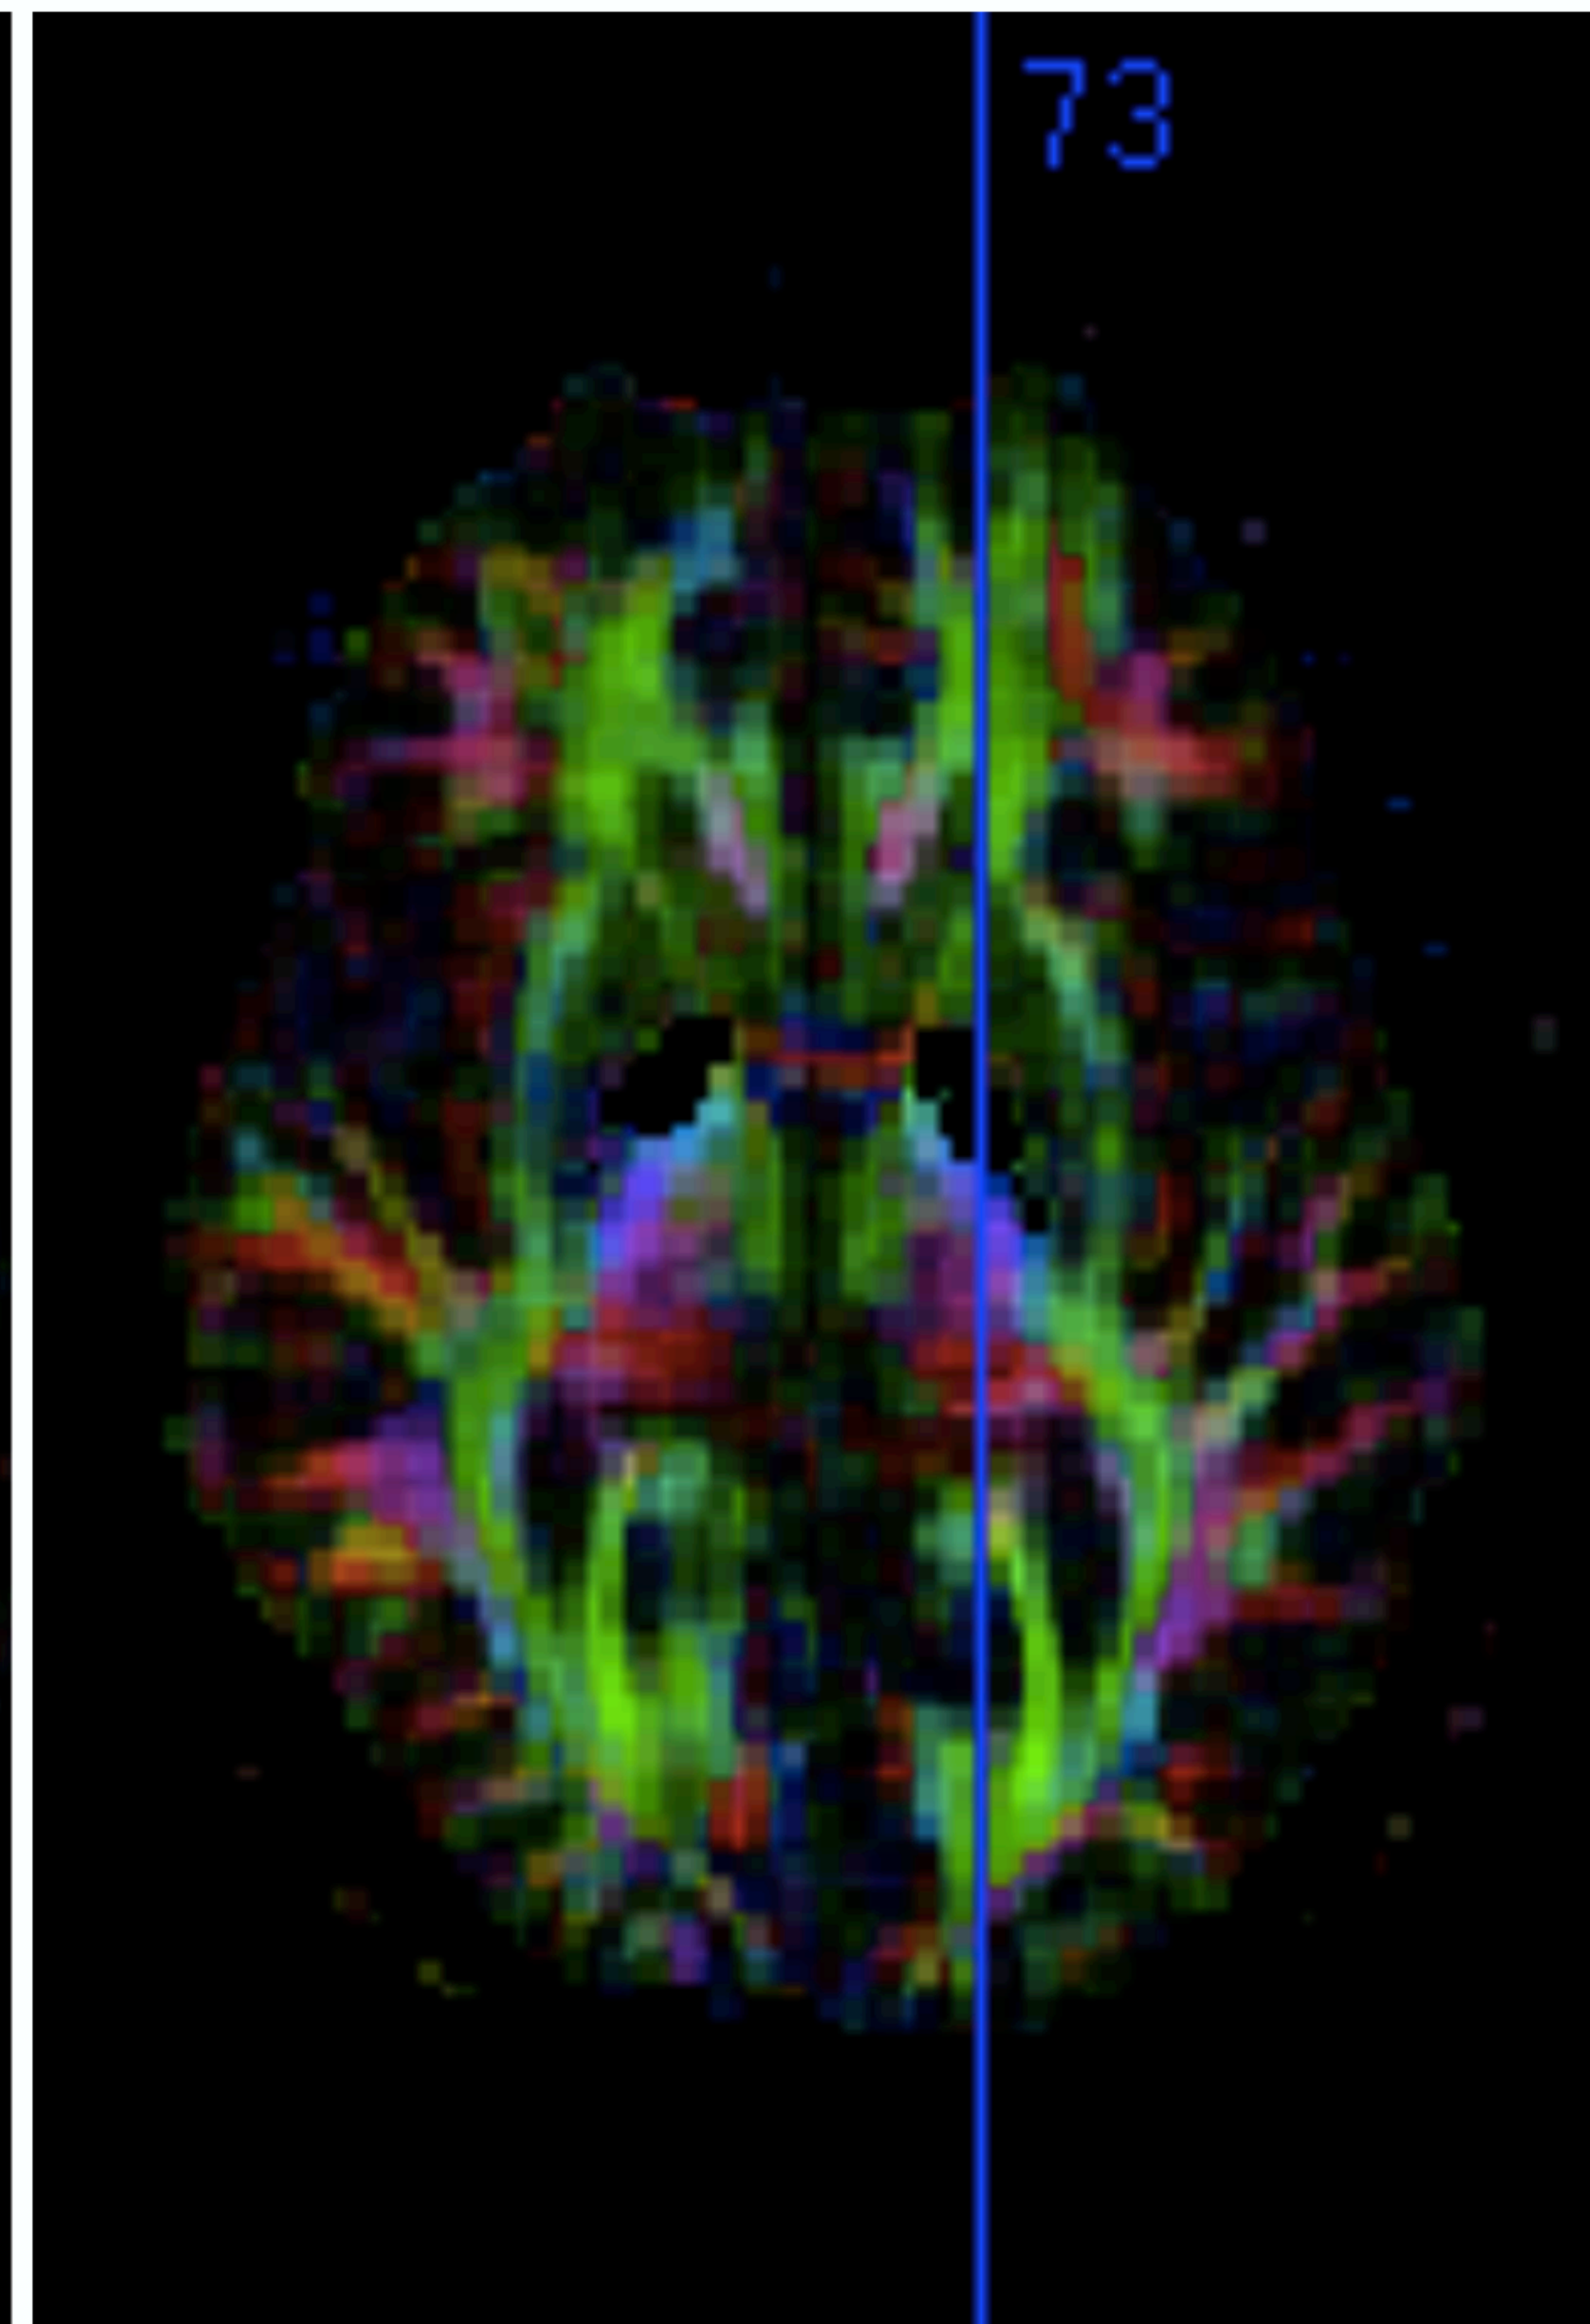

73

i.

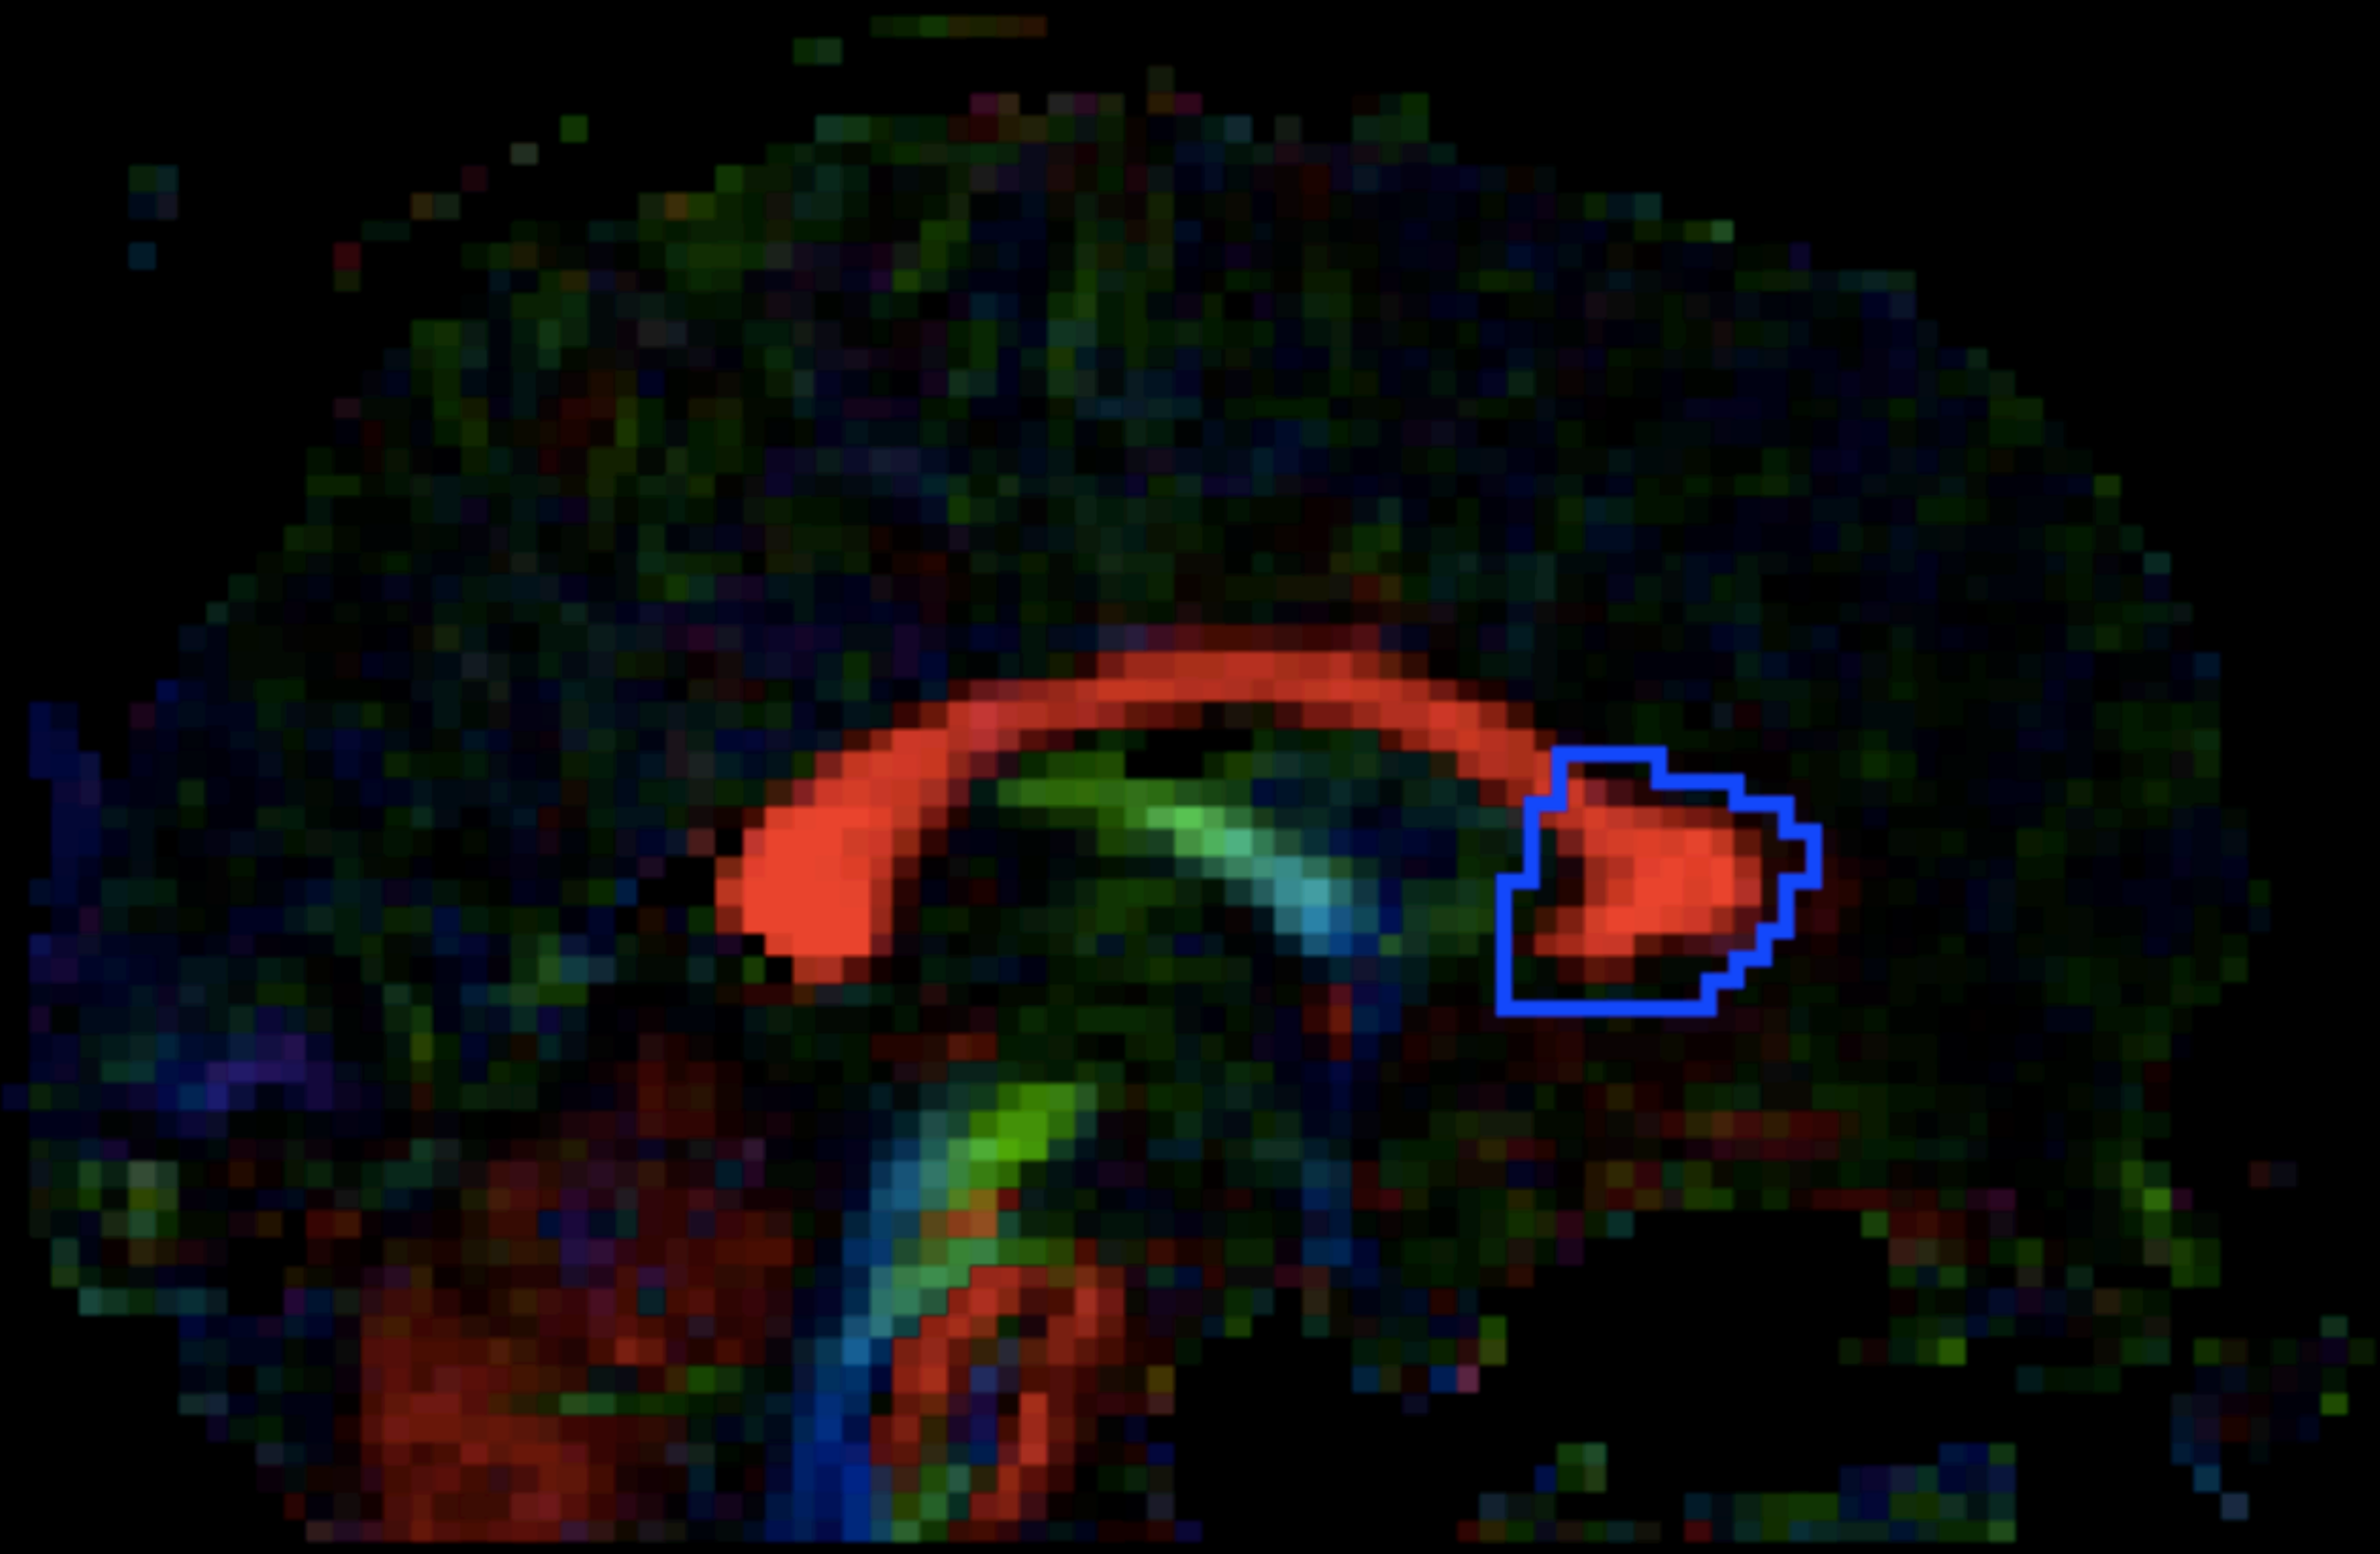

ROI 1

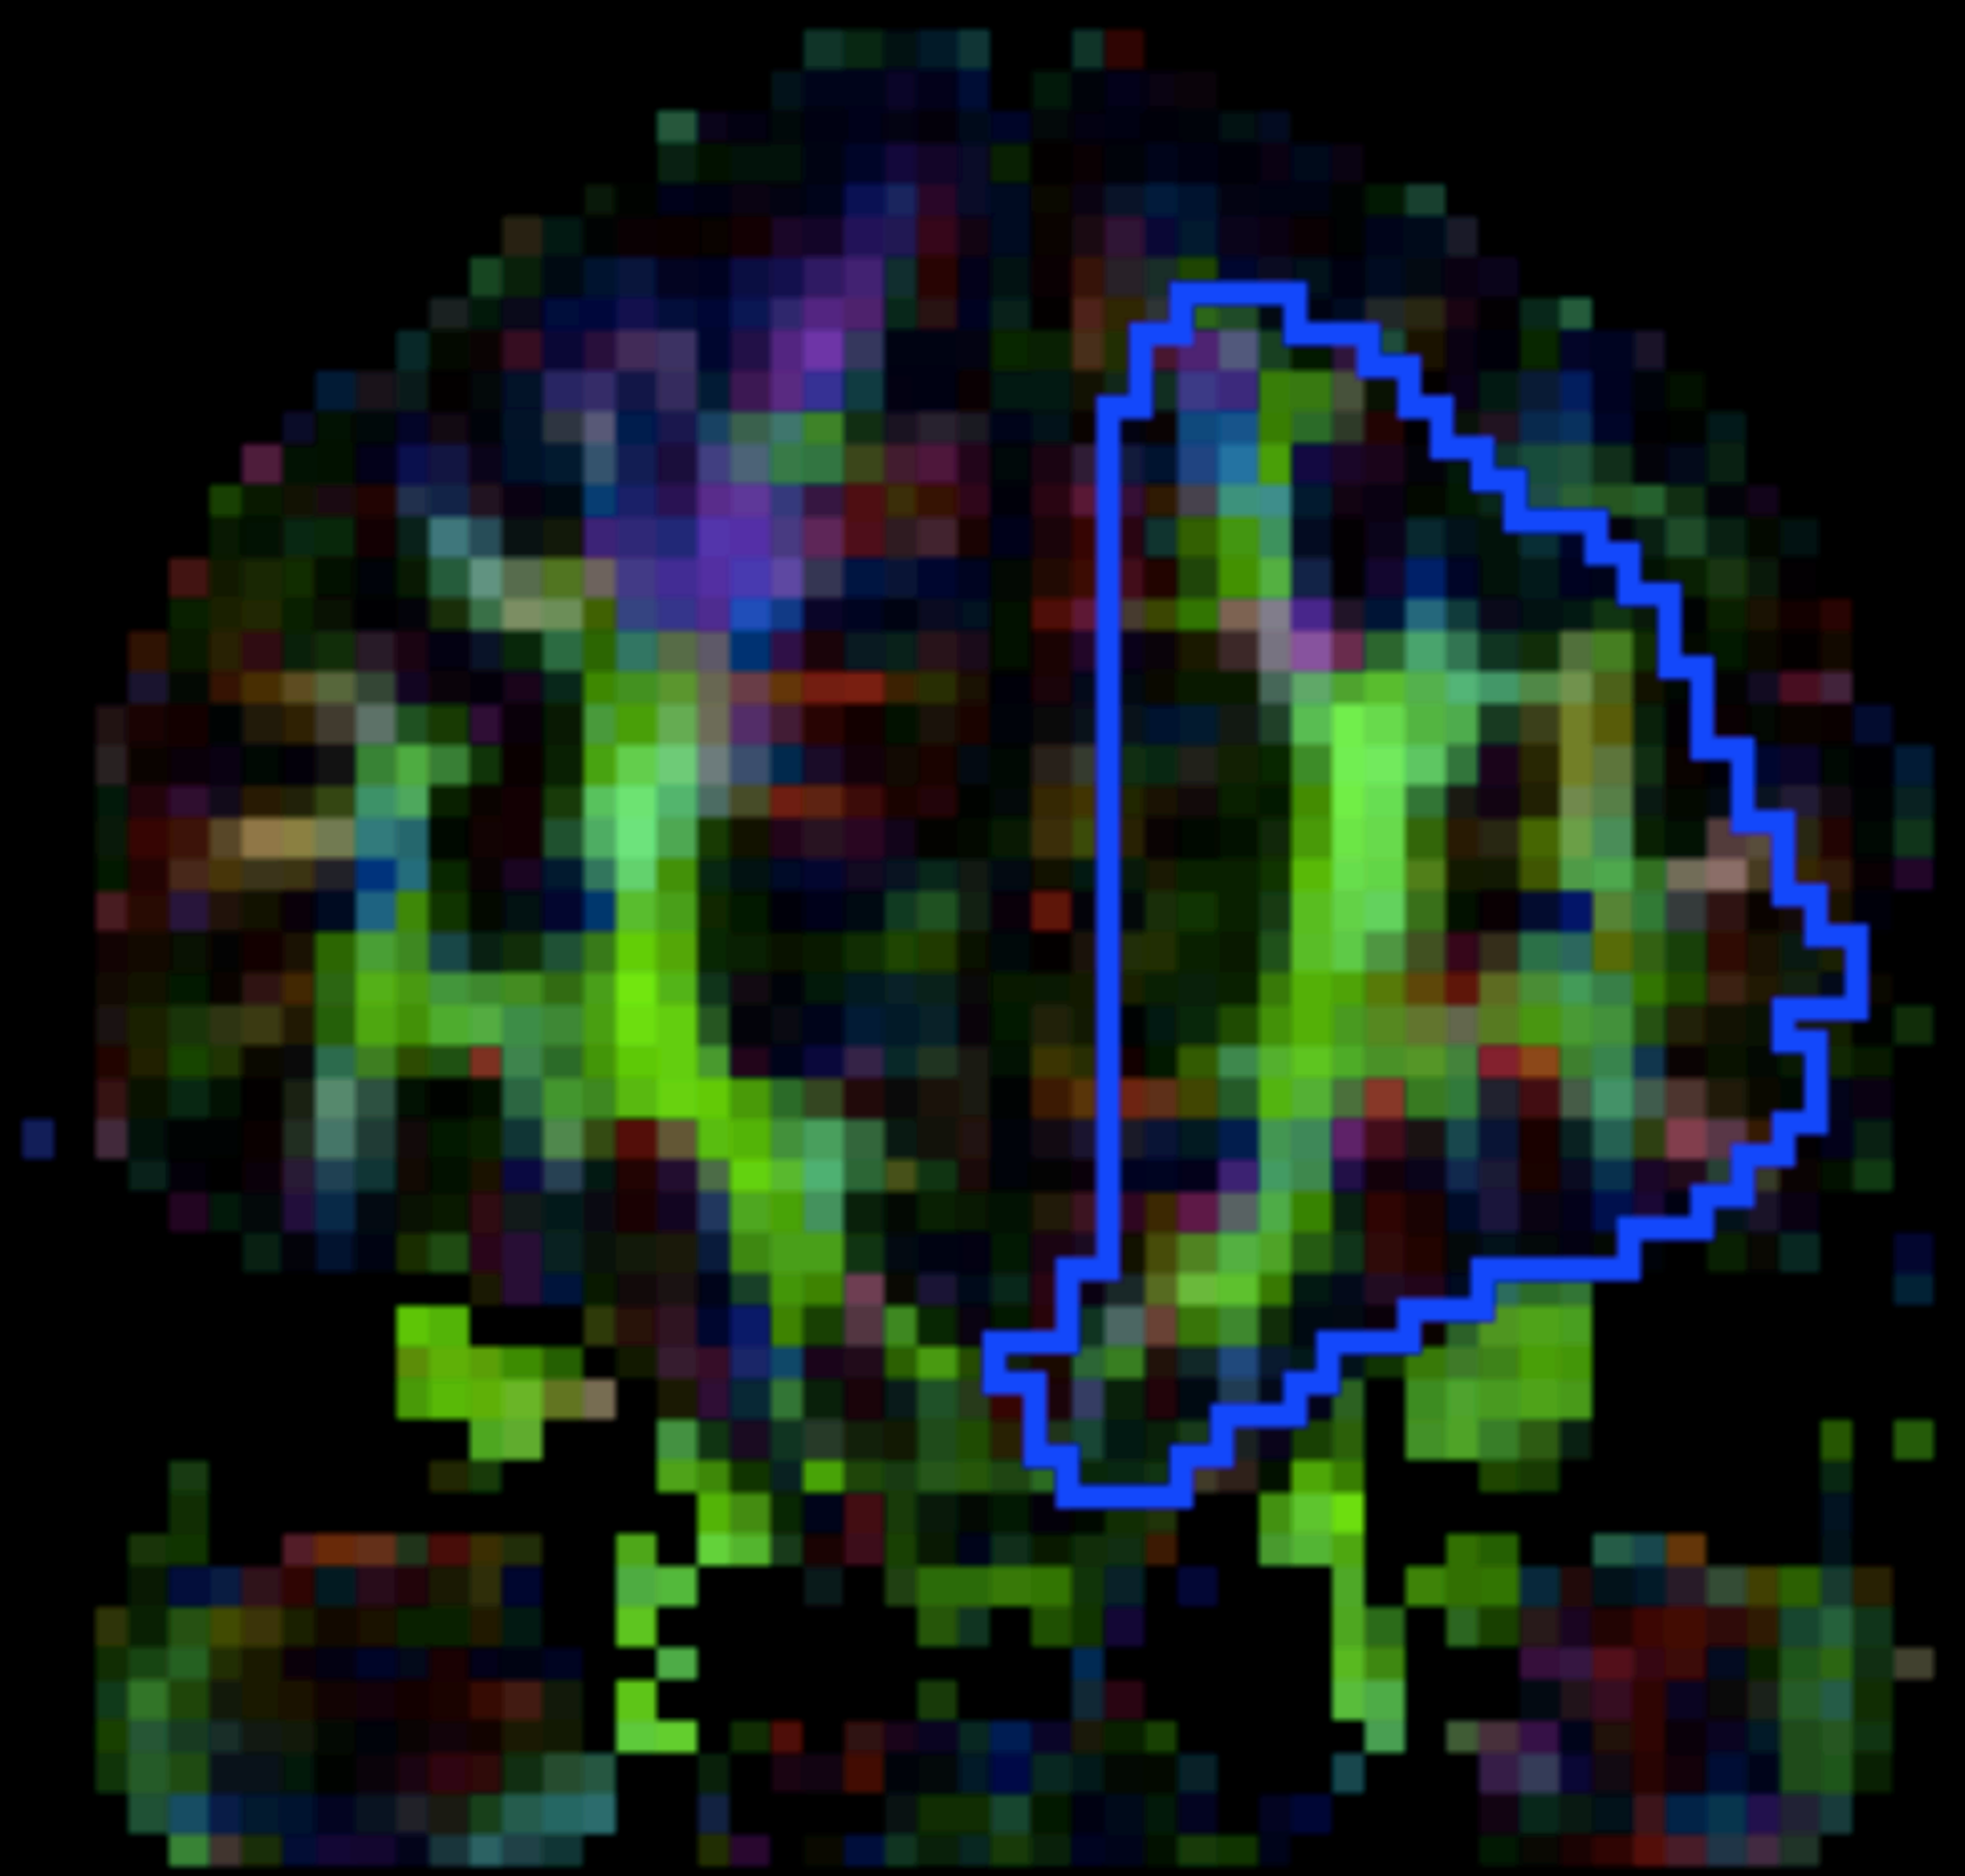

ROI 2

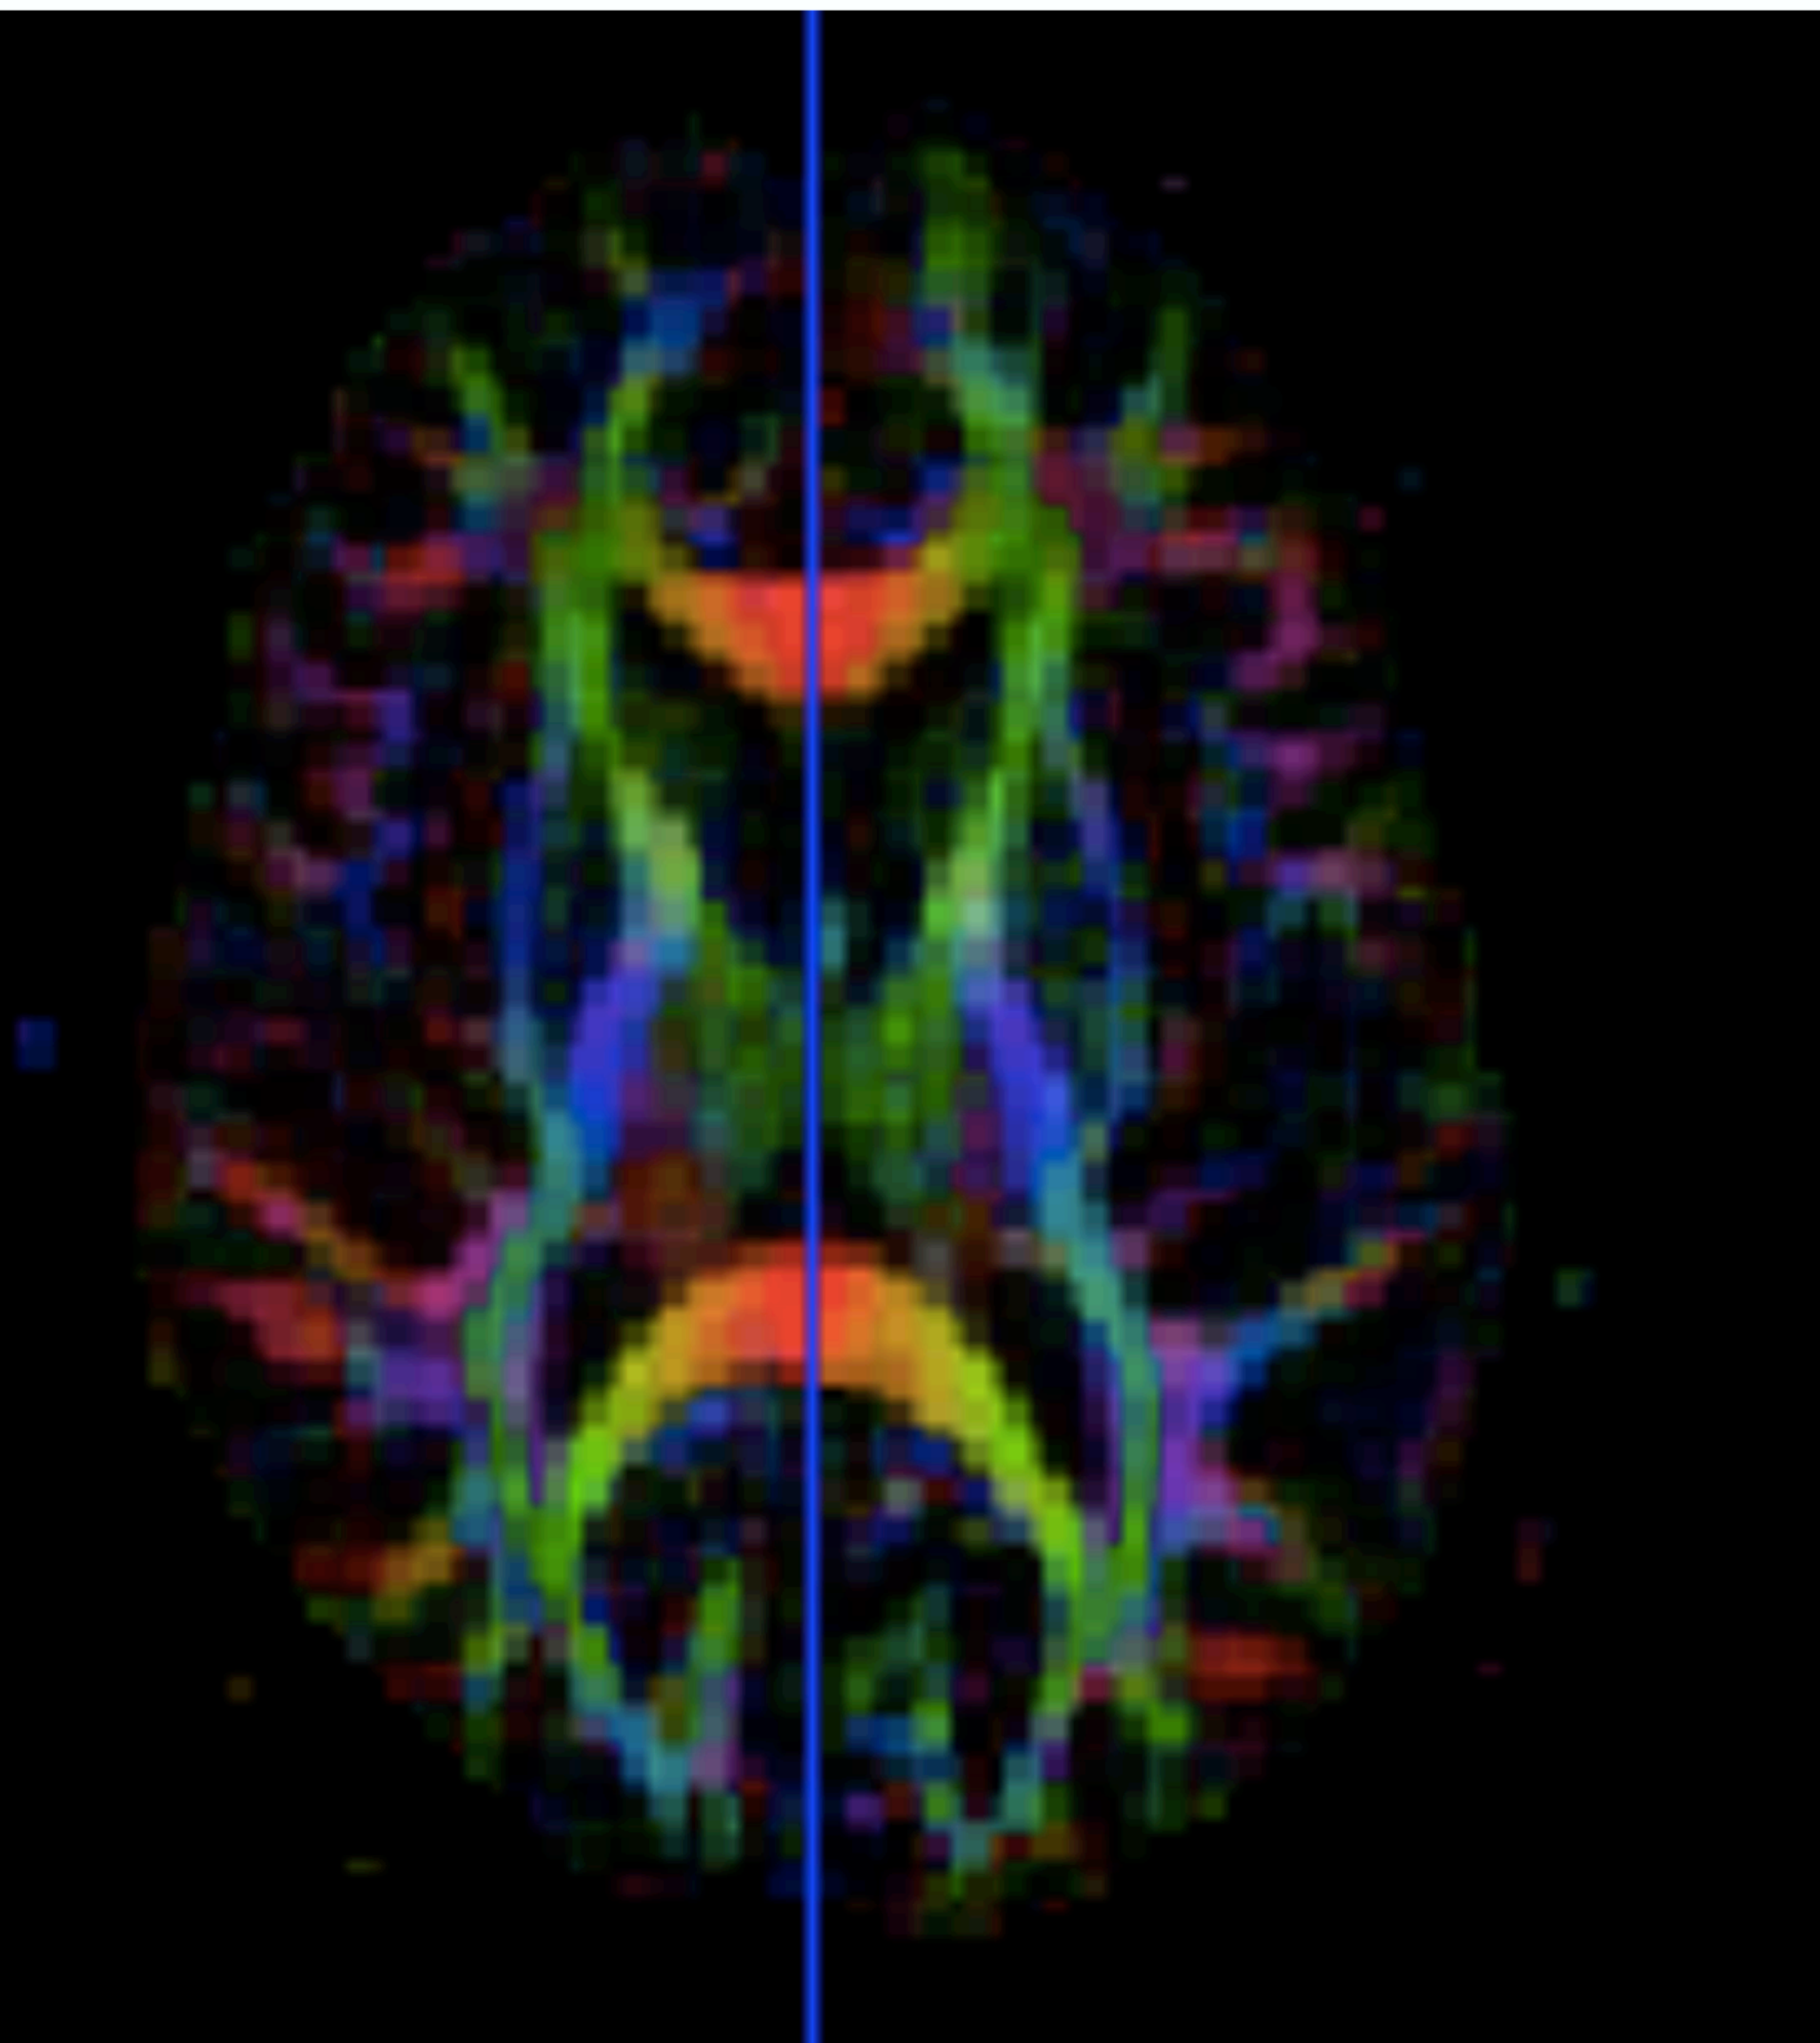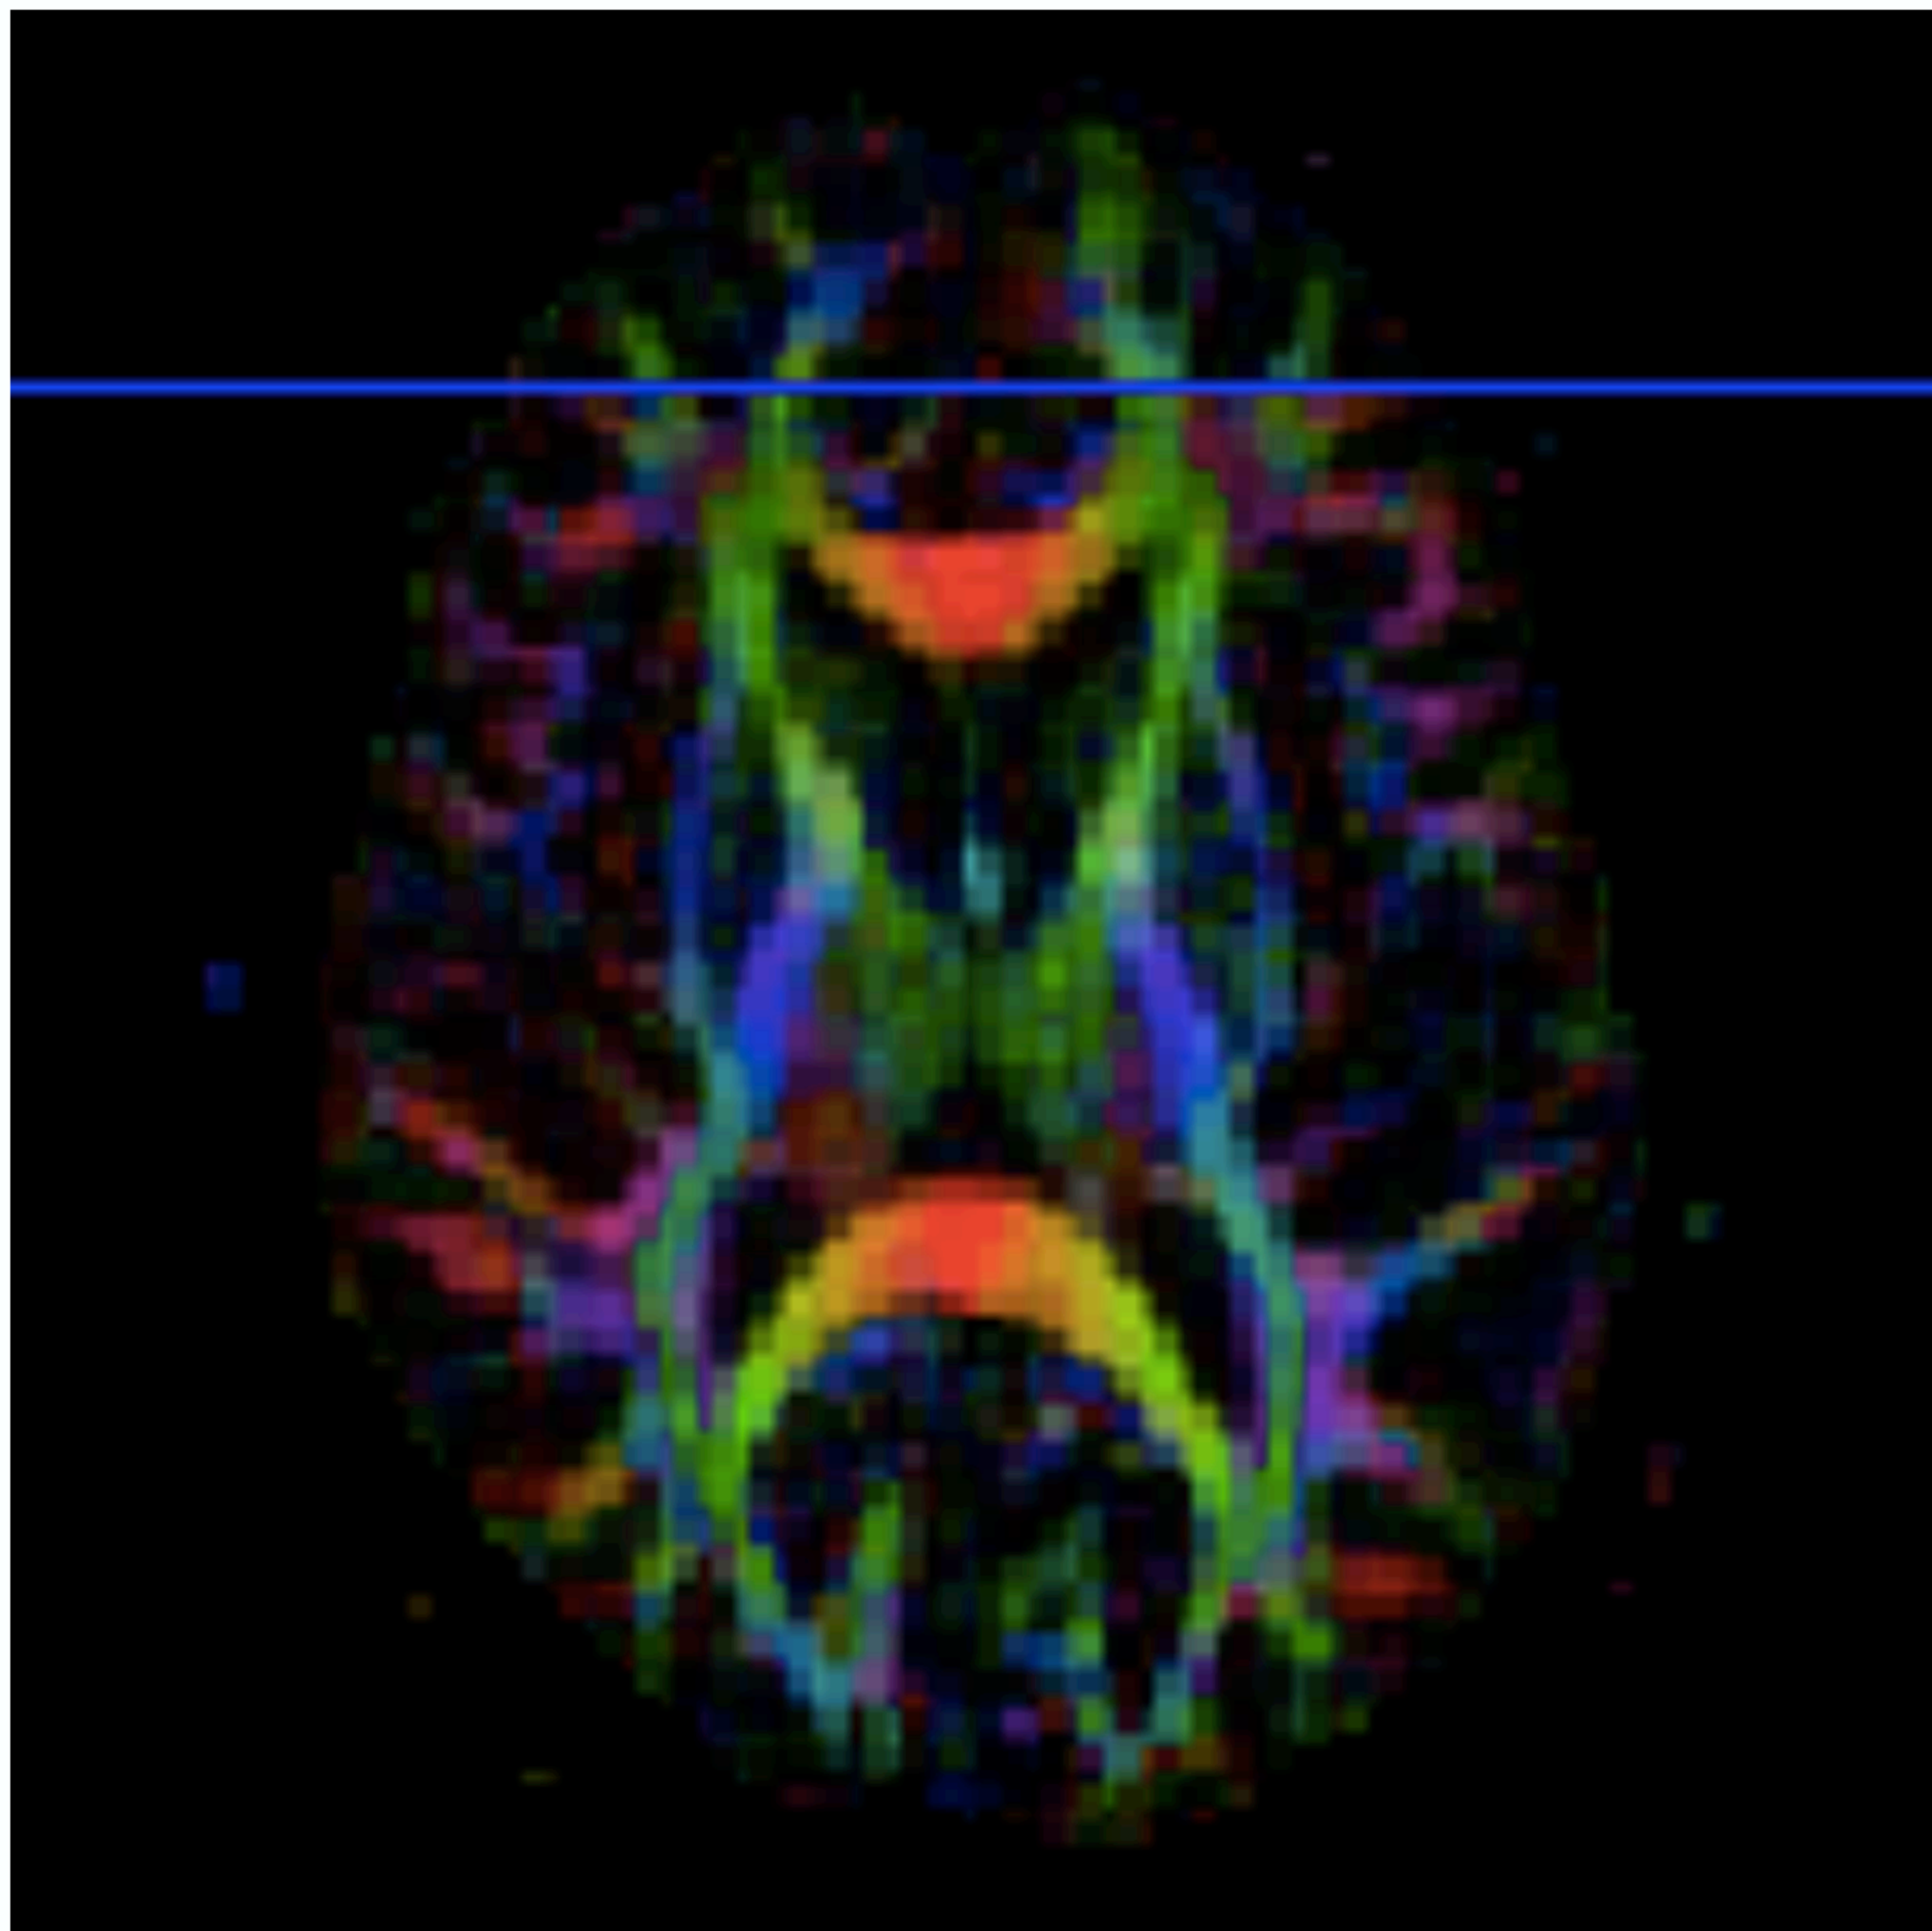

**Supplementary images 1 a-i.** Regions of interest delineation (ROI) = anatomical landmarks for all tract segments in one hemisphere contralateral to the tumor, overlaid on FA-color maps.

Upper images contain delineated ROIs while lower images indicate the position on an orthogonal slice.

1a. Cortico-spinal tract. ROI 1: Superior level of the pons. ROI 2: Inferior part of the posterior limb of the internal capsule at the horizontal level of the anterior commissure. ROI 3: Superior part of the posterior limb of the internal capsule. ROI 4: Superior to the cingulum in the corona radiata.

1b. Inferior fronto-occipital fasciculus. ROI 1: Anterior to the genu of the callosal body. ROI 2: Anterior aspect of the external capsule. ROI 3: Posterior to the anterior commissure in the external capsule. ROI 4: Posterior to the splenium of the callosal body.

1c. Cingulum. ROI 1: Superior to the anterior part of the callosal body. ROI 2: Superior to the middle part of the callosal body. ROI 3: Superior to the posterior part of the callosal body.

1d. Parahippocampal part of the cingulum. ROI 1: Medially in the temporal lobe at the level of the superior part of the pons. ROI 2: Parasagittal, superior to the cerebellum. ROI 3: Inferior to the splenium of the callosal body.

1e. Arcuate fasciculus. ROI 1: Lateral to the corona radiata, at a vertical level of the thalamus. ROI 2: Posterior to ROI number one, at a vertical level of the anterior aspect of the cerebellum. ROI 3: In the occipito-temporal region at the level of the thalamus.

1f. Inferior longitudinal fasciculus. ROI 1: In the temporal lobe at the horizontal level of the mesencephalon. ROI 2: In the occipito-temporal region at the horizontal level of the thalamus.

ROI 3: In the occipital lobe at the horizontal level of the mesencephalon.

1g. Uncinate fasciculus. ROI 1: Anterior to genu of the callosal body. ROI 2: Anterior region of the external capsule. ROI 3: Anterior region of the temporal lobe. A negative ROI (not-ROI) was positioned posterior to ROI number two.

1h. Fornix. ROI 1: Midline, below the callosal body. ROI 2: posterior to ROI number one. ROI 3: Below the thalamus.

1i. Forceps minor of the callosal body. ROI 2: Genu of the callosal body. ROI 2: Anterior to the genu of the callosal body.

Supplementary table 1. Tractography details

| Tract                                | Segment   | Side          | N voxels mean (SD) | Length mm mean (SD) |
|--------------------------------------|-----------|---------------|--------------------|---------------------|
| Corticospinal tract                  | Segment 1 | Ipsilateral   | 342 (91)           | 27 (2)              |
|                                      |           | Contralateral | 374 (89)           | 28 (1)              |
|                                      | Segment 2 | Ipsilateral   | 712 (152)          | 26 (1)              |
|                                      |           | Contralateral | 721 (199)          | 25 (1)              |
|                                      | Segment 3 | Ipsilateral   | 735 (176)          | 26 (2)              |
|                                      |           | Contralateral | 775 (164)          | 25 (1)              |
| Inferior fronto-occipital fasciculus | Segment 1 | Ipsilateral   | 356 (143)*         | 35 (2)*             |
|                                      |           | Contralateral | 409 (124)*         | 35 (1)*             |
|                                      | Segment 2 | Ipsilateral   | 236 (73)           | 30 (2)              |
|                                      |           | Contralateral | 219 (48)           | 30 (1)              |
|                                      | Segment 3 | Ipsilateral   | 541 (267)†         | 63 (4)†             |
|                                      |           | Contralateral | 661 (214)†         | 63 (2)†             |
| Cingulum                             | Segment 1 | Ipsilateral   | 176 (40)           | 32 (3)              |
|                                      |           | Contralateral | 183 (41)           | 32 (3)              |
|                                      | Segment 2 | Ipsilateral   | 231 (54)           | 32 (3)              |
|                                      |           | Contralateral | 235 (62)           | 32 (3)              |
| Parahippocampal cingulum             | Segment 1 | Ipsilateral   | 151 (42)           | 22 (3)              |
|                                      |           | Contralateral | 151 (34)           | 23 (2)              |
|                                      | Segment 2 | Ipsilateral   | 102 (32)           | 25 (4)              |
|                                      |           | Contralateral | 107 (25)           | 25 (2)              |
| Arcuate fasciculus                   | Segment 1 | Ipsilateral   | 416 (124)          | 22 (2)              |
|                                      |           | Contralateral | 457 (115)          | 22 (1)              |
|                                      | Segment 2 | Ipsilateral   | 311 (121)‡         | 37 (9)‡             |
|                                      |           | Contralateral | 323 (111)‡         | 36 (6)‡             |
| Inferior longitudinal fasciculus     | Segment 1 | Ipsilateral   | 604 (153)          | 29 (1)              |
|                                      |           | Contralateral | 631 (166)          | 29 (1)              |
|                                      | Segment 2 | Ipsilateral   | 599 (170)          | 30 (1)              |
|                                      |           | Contralateral | 569 (122)          | 30 (1)              |
| Uncinate fasciculus                  | Segment 1 | Ipsilateral   | 356 (154)§         | 35 (3)§             |
|                                      |           | Contralateral | 436 (150)§         | 35 (2)§             |
|                                      | Segment 2 | Ipsilateral   | 276 (117)¶         | 48 (9)¶             |
|                                      |           | Contralateral | 312 (108)¶         | 47 (5)¶             |
| Fornix                               | Segment 1 | Midline       | 168 (41)¶¶         | 11 (1)¶¶            |
|                                      | Segment 2 | Ipsilateral   | 160 (62)**         | 31 (2)**            |
|                                      |           | Contralateral | 173 (56)**         | 31 (1)**            |
| Corpus callosum Forceps minor        | Segment 1 | Ipsilateral   | 950 (289)          | 34 (2)              |
|                                      |           | Contralateral | 890 (237)          | 35 (3)              |

\*Patient number 26 excluded from the analysis.

†Patient number 34 excluded from analysis

‡Patient number 6, 8 and 20 excluded from analysis.

§Patient number 32 excluded from the analysis.

¶Patient number 27 excluded from the analysis.

¶¶Patient number 12 and 14 excluded from analysis.

\*\*Patient number 12 and 25 excluded from analysis.

Supplementary table 2. Full tractography results

| Track                | n  | Cortico-spinal tract                 | <i>p</i>        | n  | Cortico-spinal tract                 | <i>p</i>        | n  | Cortico-spinal tract                 | <i>p</i>        |
|----------------------|----|--------------------------------------|-----------------|----|--------------------------------------|-----------------|----|--------------------------------------|-----------------|
| DTI scalars          |    | FA ratio - mean (SD)                 |                 |    | FA ratio - mean (SD)                 |                 |    | FA ratio - mean (SD)                 |                 |
| Segment              |    | 1                                    |                 |    | 2                                    |                 |    | 3                                    |                 |
| Dislocated tract     | 8  | 1.01 (0.05)                          | 0.361           | 8  | 1.02 (0.07)                          | <b>0.044464</b> | 8  | 1.04 (0.09)                          | 0.1             |
| Not dislocated tract | 26 | 0.99 (0.05)                          |                 | 26 | 0.97 (0.06)                          |                 | 26 | 0.98 (0.08)                          |                 |
| Tumour type AC       | 18 | 1.00 (0.05)                          | 0.692           | 18 | 0.98 (0.07)                          | 0.617           | 18 | 1.00 (0.08)                          | 0.184           |
| Tumor type OD        | 16 | 1.00 (0.04)                          |                 | 16 | 0.99 (0.06)                          |                 | 16 | 0.98 (0.08)                          |                 |
| Tumour grade II      | 22 | 0.99 (0.04)                          | 0.117           | 22 | 0.97 (0.06)                          | 0.227           | 22 | 0.98 (0.09)                          | 0.126           |
| Tumour grade III     | 12 | 1.02 (0.06)                          |                 | 12 | 1.00 (0.07)                          |                 | 12 | 1.02 (0.07)                          |                 |
| Tumour side left     | 18 | 1.03 (0.04)                          | <b>0.000273</b> | 18 | 1.01 (0.05)                          | <b>0.007496</b> | 18 | 0.99 (0.08)                          | 0.692           |
| Tumour side right    | 16 | 0.97 (0.03)                          |                 | 16 | 0.95 (0.07)                          |                 | 16 | 1.00 (0.09)                          |                 |
| Track                | n  | Cortico-spinal tract                 | <i>p</i>        | n  | Cortico-spinal tract                 | <i>p</i>        | n  | Cortico-spinal tract                 | <i>p</i>        |
| DTI scalars          |    | MD ratio - mean (SD)                 |                 |    | MD ratio - mean (SD)                 |                 |    | MD ratio - mean (SD)                 |                 |
| Segment              |    | 1                                    |                 |    | 2                                    |                 |    | 3                                    |                 |
| Dislocated tract     | 8  | 0.99 (0.02)                          | 0.641           | 8  | 1.02 (0.02)                          | 0.077           | 8  | 1.00 (0.03)                          | 0.529           |
| Not dislocated tract | 26 | 0.99 (0.04)                          |                 | 26 | 1.01 (0.04)                          |                 | 26 | 1.02 (0.07)                          |                 |
| Tumour type AC       | 18 | 0.98 (0.03)                          | 0.133           | 18 | 1.02 (0.03)                          | <b>0.007496</b> | 18 | 1.01 (0.06)                          | 0.931           |
| Tumor type OD        | 16 | 1.00 (0.04)                          |                 | 16 | 1.00 (0.04)                          |                 | 16 | 1.02 (0.08)                          |                 |
| Tumour grade II      | 22 | 0.99 (0.04)                          | 0.843           | 22 | 1.01 (0.04)                          | 0.397           | 22 | 1.03 (0.08)                          | 0.188           |
| Tumour grade III     | 12 | 0.99 (0.04)                          |                 | 12 | 1.01 (0.02)                          |                 | 12 | 0.99 (0.02)                          |                 |
| Tumour side left     | 18 | 1.00 (0.04)                          | 0.162           | 18 | 1.00 (0.04)                          | 0.438           | 18 | 1.00 (0.05)                          | <b>0.013626</b> |
| Tumour side right    | 16 | 0.98 (0.04)                          |                 | 16 | 1.01 (0.03)                          |                 | 16 | 1.04 (0.08)                          |                 |
| Track                | n  | Inferior fronto-occipital fasciculus | <i>p</i>        | n  | Inferior fronto-occipital fasciculus | <i>p</i>        | n  | Inferior fronto-occipital fasciculus | <i>p</i>        |
| DTI scalars          |    | FA ratio - mean (SD)                 |                 |    | FA ratio - mean (SD)                 |                 |    | FA ratio - mean (SD)                 |                 |
| Segment              |    | 1                                    |                 |    | 2                                    |                 |    | 3                                    |                 |
| Dislocated tract     | 4  | 1.00 (0.09)                          | 0.28            | 4  | 0.99 (0.07)                          | 0.103           | 4  | 1.00 (0.09)                          | 0.639           |
| Not dislocated tract | 29 | 0.90 (0.15)                          |                 | 30 | 0.86 (0.18)                          |                 | 29 | 0.97 (0.12)                          |                 |
| Tumour type AC       | 17 | 0.93 (0.11)                          | 0.46            | 18 | 0.88 (0.17)                          | 0.849           | 18 | 0.96 (0.11)                          | 0.303           |
| Tumor type OD        | 16 | 0.89 (0.17)                          |                 | 16 | 0.87 (0.18)                          |                 | 15 | 0.99 (0.12)                          |                 |
| Tumour grade II      | 22 | 0.93 (0.12)                          | 0.456           | 22 | 0.88 (0.16)                          | 0.843           | 22 | 0.98 (0.12)                          | 0.606           |
| Tumour grade III     | 11 | 0.87 (0.18)                          |                 | 12 | 0.87 (0.20)                          |                 | 11 | 0.96 (0.10)                          |                 |
| Tumour side left     | 17 | 0.89 (0.17)                          | 0.627           | 18 | 0.86 (0.22)                          | 0.617           | 17 | 0.96 (0.14)                          | 0.986           |
| Tumour side right    | 16 | 0.93 (0.11)                          |                 | 16 | 0.89 (0.09)                          |                 | 16 | 0.98 (0.08)                          |                 |
| Track                | n  | Inferior fronto-occipital fasciculus | <i>p</i>        | n  | Inferior fronto-occipital fasciculus | <i>p</i>        | n  | Inferior fronto-occipital fasciculus | <i>p</i>        |
| DTI scalars          |    | MD ratio - mean (SD)                 |                 |    | MD ratio - mean (SD)                 |                 |    | MD ratio - mean (SD)                 |                 |

| Segment              |    | 1           |       | 2  |             | 3     |    |             |       |
|----------------------|----|-------------|-------|----|-------------|-------|----|-------------|-------|
| Dislocated tract     | 4  | 1.00 (0.03) | 0.215 | 4  | 1.03 (0.02) | 0.979 | 4  | 1.03 (0.06) | 0.934 |
| Not dislocated tract | 29 | 1.09 (0.18) |       | 30 | 1.11 (0.21) |       | 29 | 1.03 (0.08) |       |
| Tumour type AC       | 17 | 1.05 (0.08) | 0.601 | 18 | 1.10 (0.18) | 0.309 | 18 | 1.04 (0.09) | 0.551 |
| Tumor type OD        | 16 | 1.12 (0.22) |       | 16 | 1.10 (0.21) |       | 15 | 1.01 (0.07) |       |
| Tumour grade II      | 22 | 1.05 (0.08) | 0.48  | 22 | 1.11 (0.21) | 0.871 | 22 | 1.03 (0.08) | 0.456 |
| Tumour grade III     | 11 | 1.15 (0.26) |       | 12 | 1.07 (0.16) |       | 11 | 1.02 (0.09) |       |
| Tumour side left     | 17 | 1.12 (0.22) | 0.957 | 18 | 1.15 (0.26) | 0.986 | 17 | 1.04 (0.09) | 0.482 |
| Tumour side right    | 16 | 1.04 (0.07) |       | 16 | 1.04 (0.04) |       | 16 | 1.01 (0.08) |       |

| Track                | n  | Cingulum             | <i>p</i>        | n  | Cingulum             | <i>p</i>        |
|----------------------|----|----------------------|-----------------|----|----------------------|-----------------|
| DTI scalars          |    | FA ratio - mean (SD) |                 |    | FA ratio - mean (SD) |                 |
| Segment              |    | 1                    |                 | 2  |                      |                 |
| Dislocated tract     | 4  | 0.89 (0.19)          | 0.35            | 4  | 0.98 (0.08)          | 0.575           |
| Not dislocated tract | 30 | 0.98 (0.21)          |                 | 30 | 0.97 (0.18)          |                 |
| Tumour type AC       | 18 | 0.95 (0.20)          | 0.501           | 18 | 0.94 (0.22)          | 0.208           |
| Tumor type OD        | 16 | 0.99 (0.22)          |                 | 16 | 1.02 (0.08)          |                 |
| Tumour grade II      | 22 | 0.95 (0.22)          | 0.576           | 22 | 0.97 (0.20)          | 0.843           |
| Tumour grade III     | 12 | 1.01 (0.18)          |                 | 12 | 0.99 (0.12)          |                 |
| Tumour side left     | 18 | 1.13 (0.10)          | <b>0.000002</b> | 18 | 1.06 (0.06)          | <b>0.000238</b> |
| Tumour side right    | 16 | 0.80 (0.15)          |                 | 16 | 0.88 (0.21)          |                 |

| Track                | n  | Cingulum             | <i>p</i> | n  | Cingulum             | <i>p</i> |
|----------------------|----|----------------------|----------|----|----------------------|----------|
| DTI scalars          |    | MD ratio - mean (SD) |          |    | MD ratio - mean (SD) |          |
| Segment              |    | 1                    |          | 2  |                      |          |
| Dislocated tract     | 4  | 1.04 (0.03)          | 0.936    | 4  | 1.01 (0.05)          | 0.769    |
| Not dislocated tract | 30 | 1.05 (0.08)          |          | 30 | 1.07 (0.24)          |          |
| Tumour type AC       | 18 | 1.05 (0.04)          | 0.234    | 18 | 1.10 (0.31)          | 1,000    |
| Tumor type OD        | 16 | 1.05 (0.11)          |          | 16 | 1.01 (0.04)          |          |
| Tumour grade II      | 22 | 1.05 (0.09)          | 0.871    | 22 | 1.07 (0.28)          | 0.358    |
| Tumour grade III     | 12 | 1.04 (0.05)          |          | 12 | 1.04 (0.07)          |          |
| Tumour side left     | 18 | 1.03 (0.04)          | 0.593    | 18 | 1.02 (0.02)          | 0.479    |
| Tumour side right    | 16 | 1.06 (0.11)          |          | 16 | 1.11 (0.33)          |          |

| Track                | n  | Parahippocampal cg   | <i>p</i> | n  | Parahippocampal cg   | <i>p</i> |
|----------------------|----|----------------------|----------|----|----------------------|----------|
| DTI scalars          |    | FA ratio - mean (SD) |          |    | FA ratio - mean (SD) |          |
| Segment              |    | 1                    |          | 2  |                      |          |
| Dislocated tract     | 1  | 0.75                 | 1,000    | 1  | 0.73                 | 1,000    |
| Not dislocated tract | 33 | 0.93 (0.18)          |          | 33 | 0.92 (0.19)          |          |
| Tumour type AC       | 18 | 0.90 (0.22)          | 0.717    | 18 | 0.87 (0.23)          | 0.208    |

|                      |    |                      |                 |    |                      |                 |
|----------------------|----|----------------------|-----------------|----|----------------------|-----------------|
| Tumor type OD        | 16 | 0.96 (0.11)          |                 | 16 | 0.96 (0.11)          |                 |
| Tumour grade II      | 22 | 0.96 (0.14)          | 0.109           | 22 | 0.95 (0.14)          | 0.256           |
| Tumour grade III     | 12 | 0.85 (0.22)          |                 | 12 | 0.84 (0.25)          |                 |
| Tumour side left     | 18 | 0.88 (0.18)          | <b>0.0238</b>   | 18 | 0.89 (0.15)          | 0.184           |
| Tumour side right    | 16 | 0.97 (0.16)          |                 | 16 | 0.94 (0.23)          |                 |
| Track                | n  | Parahippocampal cg   | <i>p</i>        | n  | Parahippocampal cg   | <i>p</i>        |
| DTI scalars          |    | MD ratio - mean (SD) |                 |    | MD ratio - mean (SD) |                 |
| Segment              |    | 1                    |                 |    | 2                    |                 |
| Dislocated tract     | 1  | 1.24                 | 1,000           | 1  | 1.23                 | 1,000           |
| Not dislocated tract | 33 | 1.09 (0.21)          |                 | 33 | 1.06 (0.17)          |                 |
| Tumour type AC       | 18 | 1.13 (0.26)          | 0.501           | 18 | 1.10 (0.22)          | 0.523           |
| Tumor type OD        | 16 | 1.06 (0.12)          |                 | 16 | 1.02 (0.09)          |                 |
| Tumour grade II      | 22 | 1.06 (0.14)          | 0.227           | 22 | 1.03 (0.10)          | 0.256           |
| Tumour grade III     | 12 | 1.16 (0.29)          |                 | 12 | 1.13 (0.25)          |                 |
| Tumour side left     | 18 | 1.13 (0.25)          | 0.593           | 18 | 1.09 (0.19)          | 0.051           |
| Tumour side right    | 16 | 1.05 (0.14)          |                 | 16 | 1.03 (0.15)          |                 |
| Track                | n  | Arcuate fasciculus   | <i>p</i>        | n  | Arcuate fasciculus   | <i>p</i>        |
| DTI scalars          |    | FA ratio - mean (SD) |                 |    | FA ratio - mean (SD) |                 |
| Segment              |    | 1                    |                 |    | 2                    |                 |
| Dislocated tract     | 4  | 0.99 (0.08)          | 0.229           | 3  | 0.99 (0.08)          | 0.57            |
| Not dislocated tract | 30 | 0.89 (0.15)          |                 | 28 | 0.91 (0.15)          |                 |
| Tumour type AC       | 18 | 0.88 (0.16)          | 0.361           | 16 | 0.86 (0.16)          | <b>0.03445</b>  |
| Tumor type OD        | 16 | 0.93 (0.13)          |                 | 15 | 0.99 (0.08)          |                 |
| Tumour grade II      | 22 | 0.90 (0.15)          | 0.9             | 21 | 0.91 (0.14)          | 0.657           |
| Tumour grade III     | 12 | 0.91 (0.15)          |                 | 10 | 0.94 (0.15)          |                 |
| Tumour side left     | 18 | 0.95 (0.11)          | 0.081           | 16 | 1.00 (0.12)          | <b>0.000347</b> |
| Tumour side right    | 16 | 0.85 (0.16)          |                 | 15 | 0.84 (0.12)          |                 |
| Track                | n  | Arcuate fasciculus   | <i>p</i>        | n  | Arcuate fasciculus   | <i>p</i>        |
| DTI scalars          |    | MD ratio - mean (SD) |                 |    | MD ratio - mean (SD) |                 |
| Segment              |    | 1                    |                 |    | 2                    |                 |
| Dislocated tract     | 4  | 1.00 (0.03)          | 0.323           | 3  | 1.00 (0.02)          | 0.404           |
| Not dislocated tract | 30 | 1.14 (0.24)          |                 | 28 | 1.08 (0.16)          |                 |
| Tumour type AC       | 18 | 1.19 (0.27)          | <b>0.008303</b> | 16 | 1.14 (0.19)          | <b>0.003231</b> |
| Tumor type OD        | 16 | 1.05 (0.15)          |                 | 15 | 1.01 (0.04)          |                 |
| Tumour grade II      | 22 | 1.10 (0.17)          | 0.871           | 21 | 1.07 (0.15)          | 0.434           |
| Tumour grade III     | 12 | 1.16 (0.32)          |                 | 10 | 1.09 (0.17)          |                 |
| Tumour side left     | 18 | 1.05 (0.15)          | <b>0.01237</b>  | 16 | 1.05 (0.14)          | 0.333           |



|                      |    |                                  |              |    |                                  |              |
|----------------------|----|----------------------------------|--------------|----|----------------------------------|--------------|
| Tumour side right    | 16 | 1.21 (0.28)                      |              | 15 | 1.10 (0.17)                      |              |
| Track                | n  | Inferior longitudinal fasciculus | <i>p</i>     | n  | Inferior longitudinal fasciculus | <i>p</i>     |
| DTI scalars          |    | FA ratio - mean (SD)             |              |    | FA ratio - mean (SD)             |              |
| Segment              |    | 1                                |              |    | 2                                |              |
| Dislocated tract     | 3  | 0.95 (0.09)                      | 0.903        | 3  | 0.97 (0.06)                      | 1,000        |
| Not dislocated tract | 31 | 0.93 (0.15)                      |              | 31 | 0.96 (0.10)                      |              |
| Tumour type AC       | 18 | 0.89 (0.16)                      | <b>0.026</b> | 18 | 0.93 (0.11)                      | 0.076        |
| Tumor type OD        | 16 | 0.99 (0.11)                      |              | 16 | 0.99 (0.08)                      |              |
| Tumour grade II      | 22 | 0.95 (0.13)                      | 0.46         | 22 | 0.97 (0.10)                      | 0.652        |
| Tumour grade III     | 12 | 0.90 (0.17)                      |              | 12 | 0.95 (0.10)                      |              |
| Tumour side left     | 18 | 0.93 (0.15)                      | 0.769        | 18 | 0.93 (0.11)                      | <b>0.028</b> |
| Tumour side right    | 16 | 0.94 (0.14)                      |              | 16 | 1.00 (0.08)                      |              |
| Track                | n  | Inferior longitudinal fasciculus | <i>p</i>     | n  | Inferior longitudinal fasciculus | <i>p</i>     |
| DTI scalars          |    | MD ratio - mean (SD)             |              |    | MD ratio - mean (SD)             |              |
| Segment              |    | 1                                |              |    | 2                                |              |
| Dislocated tract     | 3  | 1.04 (0.09)                      | 0.808        | 3  | 1.03 (0.08)                      | 0.808        |
| Not dislocated tract | 31 | 1.05 (0.11)                      |              | 31 | 1.02 (0.09)                      |              |
| Tumour type AC       | 18 | 1.08 (0.14)                      | 0.056        | 18 | 1.04 (0.11)                      | 0.343        |
| Tumor type OD        | 16 | 1.01 (0.06)                      |              | 16 | 1.00 (0.06)                      |              |
| Tumour grade II      | 22 | 1.04 (0.10)                      | 0.552        | 22 | 1.02 (0.09)                      | 0.652        |
| Tumour grade III     | 12 | 1.07 (0.14)                      |              | 12 | 1.04 (0.09)                      |              |
| Tumour side left     | 18 | 1.06 (0.11)                      | 0.617        | 18 | 1.05 (0.10)                      | 0.162        |
| Tumour side right    | 16 | 1.04 (0.11)                      |              | 16 | 1.00 (0.07)                      |              |
| Track                | n  | Uncinate fasciculus              | <i>p</i>     | n  | Uncinate fasciculus              | <i>p</i>     |
| DTI scalars          |    | FA ratio - mean (SD)             |              |    | FA ratio - mean (SD)             |              |
| Segment              |    | 1                                |              |    | 2                                |              |
| Dislocated tract     | 0  | NA*                              | NA*          | 0  | NA*                              | NA*          |
| Not dislocated tract | 33 | 0.91 (0.15)                      |              | 33 | 0.91 (0.17)                      |              |
| Tumour type AC       | 18 | 0.92 (0.13)                      | 1,000        | 18 | 0.91 (0.17)                      | 0.899        |
| Tumor type OD        | 15 | 0.91 (0.17)                      |              | 15 | 0.92 (0.18)                      |              |
| Tumour grade II      | 22 | 0.93 (0.14)                      | 0.633        | 21 | 0.93 (0.16)                      | 0.443        |
| Tumour grade III     | 11 | 0.90 (0.16)                      |              | 12 | 0.88 (0.18)                      |              |
| Tumour side left     | 17 | 0.88 (0.15)                      | 0.358        | 17 | 0.89 (0.21)                      | 0.928        |
| Tumour side right    | 16 | 0.95 (0.13)                      |              | 16 | 0.94 (0.11)                      |              |
| Track                | n  | Uncinate fasciculus              | <i>p</i>     | n  | Uncinate fasciculus              | <i>p</i>     |
| DTI scalars          |    | MD ratio - mean (SD)             |              |    | MD ratio - mean (SD)             |              |

| Segment              |    | 1           |       | 2  |             |
|----------------------|----|-------------|-------|----|-------------|
| Dislocated tract     | 0  | NA*         | NA*   | 0  | NA*         |
| Not dislocated tract | 33 | 1.07 (0.12) |       | 33 | 1.10 (0.20) |
| Tumour type AC       | 18 | 1.06 (0.10) | 0.551 | 18 | 1.11 (0.21) |
| Tumour type OD       | 15 | 1.09 (0.15) |       | 15 | 1.08 (0.19) |
| Tumour grade II      | 22 | 1.06 (0.09) | 0.985 | 21 | 1.10 (0.22) |
| Tumour grade III     | 11 | 1.10 (0.17) |       | 12 | 1.09 (0.16) |
| Tumour side left     | 17 | 1.09 (0.15) | 0.787 | 17 | 1.17 (0.24) |
| Tumour side right    | 16 | 1.05 (0.07) |       | 16 | 1.02 (0.10) |

| Track                | n   | Fornix      | <i>p</i> | n  | Fornix             | <i>p</i> |
|----------------------|-----|-------------|----------|----|--------------------|----------|
| DTI scalars          |     | FA ratio    |          |    | FA ratio mean (SD) |          |
| Segment              |     | 1 - midline |          |    | 2                  |          |
| Dislocated tract     | NA† | NA†         | NA†      | 8  | NA*                | NA*      |
| Not dislocated tract | NA† | NA†         |          | 26 | NA*                |          |
| Tumour type AC       | NA† | NA†         | NA†      | 17 | 1.02 (0.11)        | 0.521    |
| Tumour type OD       | NA† | NA†         |          | 15 | 1.01 (0.08)        |          |
| Tumour grade II      | NA† | NA†         | NA†      | 21 | 1.02 (0.08)        | 0.552    |
| Tumour grade III     | NA† | NA†         |          | 11 | 1.00 (0.11)        |          |
| Tumour side left     | NA† | NA†         | NA†      | 17 | 1.03 (0.09)        | 0.497    |
| Tumour side right    | NA† | NA†         |          | 15 | 1.00 (0.09)        |          |

| Track                | n   | Fornix      | <i>p</i> | n  | Fornix               | <i>p</i>        |
|----------------------|-----|-------------|----------|----|----------------------|-----------------|
| DTI scalars          |     | MD ratio    |          |    | MD ratio - mean (SD) |                 |
| Segment              |     | 1 - midline |          |    | 2                    |                 |
| Dislocated tract     | NA† | NA†         | NA†      | 8  | NA*                  | NA*             |
| Not dislocated tract | NA† | NA†         |          | 26 | NA*                  |                 |
| Tumour type AC       | NA† | NA†         | NA†      | 17 | 1.04 (0.18)          | 0.91            |
| Tumour type OD       | NA† | NA†         |          | 15 | 1.03 (0.20)          |                 |
| Tumour grade II      | NA† | NA†         | NA†      | 21 | 1.06 (0.19)          | 0.19            |
| Tumour grade III     | NA† | NA†         |          | 11 | 0.98 (0.17)          |                 |
| Tumour side left     | NA† | NA†         | NA†      | 17 | 0.95 (0.12)          | <b>0.011403</b> |
| Tumour side right    | NA† | NA†         |          | 15 | 1.12 (0.20)          |                 |

| Track                | n  | Callosal body minor forceps | <i>p</i> |
|----------------------|----|-----------------------------|----------|
| DTI scalars          |    | FA ratio - mean (SD)        |          |
| Segment              |    | 1                           |          |
| Dislocated tract     | 0  | NA*                         | NA*      |
| Not dislocated tract | 34 | 0.97 (0.09)                 |          |
| Tumour type AC       | 18 | 0.99 (0.06)                 | 0.501    |

|                      |    |                             |          |
|----------------------|----|-----------------------------|----------|
| Tumor type OD        | 16 | 0.95 (0.12)                 |          |
| Tumour grade II      | 22 | 0.97 (0.09)                 | 0.928    |
| Tumour grade III     | 12 | 0.97 (0.09)                 |          |
| Tumour side left     | 18 | 1.00 (0.07)                 | 0.133    |
| Tumour side right    | 16 | 0.94 (0.10)                 |          |
| Track                | n  | Callosal body minor forceps | <i>p</i> |
| DTI scalars          |    | MD ratio - mean (SD)        |          |
| Segment              |    | 1                           |          |
| Dislocated tract     | 0  | NA*                         | NA*      |
| Not dislocated tract | 34 | 1.04 (0.07)                 |          |
| Tumour type AC       | 18 | 1.01 (0.03)                 | 0.133    |
| Tumor type OD        | 16 | 1.07 (0.09)                 |          |
| Tumour grade II      | 22 | 1.04 (0.07)                 | 0.601    |
| Tumour grade III     | 12 | 1.05 (0.08)                 |          |
| Tumour side left     | 18 | 1.04 (0.07)                 | 0.309    |
| Tumour side right    | 16 | 1.04 (0.07)                 |          |

\*No dislocated tracts

†No ratio due to tract segment in midline

FA and MD ratios were compared between groups (FA ratio= ipsilateral mean FA divided with contralateral mean FA, MD ratio = ipsilateral mean MD divided with contralateral mean MD). Mann-whitney U tests.  $p < 0.05$  was regarded as statistically significant

FA = fractional anisotropy, MD = mean diffusivity, cg = cingulum
